# Supplementary material for: Comparative Transcriptome Analysis of Onion in Response to Infection by Alternaria porri (Ellis) Cifferi
Source: Frontiers journal article supplement (doi:10.3389/fpls.2022.857306), 2022-04-11
Supplement: Data_Sheet_3.ZIP [file Data_Sheet_3.ZIP]

```

ONEWAY VAR00002 BY VAR00001
  /STATISTICS DESCRIPTIVES HOMOGENEITY
  /MISSING ANALYSIS
  /POSTHOC=TUKEY DUNCAN LSD ALPHA(0.05) .

```

## Oneway

### Notes

|                        |                                                                                                                                          |                                                                                                        |
|------------------------|------------------------------------------------------------------------------------------------------------------------------------------|--------------------------------------------------------------------------------------------------------|
| Output Created         | 13-Feb-2022 18:24:44                                                                                                                     |                                                                                                        |
| Comments               |                                                                                                                                          |                                                                                                        |
| Input                  | Active Dataset                                                                                                                           | DataSet0                                                                                               |
|                        | Filter                                                                                                                                   | <none>                                                                                                 |
|                        | Weight                                                                                                                                   | <none>                                                                                                 |
|                        | Split File                                                                                                                               | <none>                                                                                                 |
|                        | N of Rows in Working Data File                                                                                                           | 12                                                                                                     |
| Missing Value Handling | Definition of Missing                                                                                                                    | User-defined missing values are treated as missing.                                                    |
|                        | Cases Used                                                                                                                               | Statistics for each analysis are based on cases with no missing data for any variable in the analysis. |
| Syntax                 | ONEWAY VAR00002 BY VAR00001<br>/STATISTICS DESCRIPTIVES<br>HOMOGENEITY<br>/MISSING ANALYSIS<br>/POSTHOC=TUKEY DUNCAN LSD<br>ALPHA(0.05). |                                                                                                        |
| Resources              | Processor Time                                                                                                                           | 00:00:00.031                                                                                           |
|                        | Elapsed Time                                                                                                                             | 00:00:00.026                                                                                           |

[DataSet0]

### Descriptives

VAR00002

|   | N | Mean     | Std. Deviation | Std. Error | 95% Confidence Interval for Mean |             | Minimum | Maximum |
|---|---|----------|----------------|------------|----------------------------------|-------------|---------|---------|
|   |   |          |                |            | Lower Bound                      | Upper Bound |         |         |
| 1 | 3 | 67.6267  | 5.03220        | 2.90534    | 55.1260                          | 80.1273     | 62.32   | 72.33   |
| 2 | 3 | 2.1816E2 | 24.93600       | 14.39681   | 156.2122                         | 280.1011    | 198.23  | 246.12  |
| 3 | 3 | 58.9433  | 7.02721        | 4.05716    | 41.4868                          | 76.3999     | 52.30   | 66.30   |

### Descriptives

VAR00002

|       | N  | Mean     | Std. Deviation | Std. Error | 95% Confidence Interval for Mean |             | Minimum | Maximum |
|-------|----|----------|----------------|------------|----------------------------------|-------------|---------|---------|
|       |    |          |                |            | Lower Bound                      | Upper Bound |         |         |
| 4     | 3  | 1.8683E2 | 32.27906       | 18.63632   | 106.6423                         | 267.0136    | 155.24  | 219.76  |
| Total | 12 | 1.3289E2 | 75.79773       | 21.88092   | 84.7291                          | 181.0482    | 52.30   | 246.12  |

### Test of Homogeneity of Variances

VAR00002

| Levene Statistic | df1 | df2 | Sig. |
|------------------|-----|-----|------|
| 2.411            | 3   | 8   | .142 |

### ANOVA

VAR00002

|                | Sum of Squares | df | Mean Square | F      | Sig. |
|----------------|----------------|----|-------------|--------|------|
| Between Groups | 59721.359      | 3  | 19907.120   | 45.804 | .000 |
| Within Groups  | 3476.893       | 8  | 434.612     |        |      |
| Total          | 63198.252      | 11 |             |        |      |

## Post Hoc Tests

### Multiple Comparisons

Dependent Variable: VAR00002

|           | (I) VAR00001 | (J) VAR00001 | Mean Difference (I-J) | Std. Error | Sig. | 95% Confidence Interval |             |
|-----------|--------------|--------------|-----------------------|------------|------|-------------------------|-------------|
|           |              |              |                       |            |      | Lower Bound             | Upper Bound |
| Tukey HSD | 1            | 2            | -150.53000 *          | 17.02178   | .000 | -205.0397               | -96.0203    |
|           |              | 3            | 8.68333               | 17.02178   | .954 | -45.8264                | 63.1931     |
|           |              | 4            | -119.20129 *          | 17.02178   | .001 | -173.7110               | -64.6916    |
|           | 2            | 1            | 150.53000 *           | 17.02178   | .000 | 96.0203                 | 205.0397    |
|           |              | 3            | 159.21333 *           | 17.02178   | .000 | 104.7036                | 213.7231    |
|           |              | 4            | 31.32871              | 17.02178   | .323 | -23.1810                | 85.8384     |
|           | 3            | 1            | -8.68333              | 17.02178   | .954 | -63.1931                | 45.8264     |
|           |              | 2            | -159.21333 *          | 17.02178   | .000 | -213.7231               | -104.7036   |
|           |              | 4            | -127.88462 *          | 17.02178   | .000 | -182.3944               | -73.3749    |
|           | 4            | 1            | 119.20129 *           | 17.02178   | .001 | 64.6916                 | 173.7110    |
|           |              | 2            | -31.32871             | 17.02178   | .323 | -85.8384                | 23.1810     |

\*. The mean difference is significant at the 0.05 level.

### Multiple Comparisons

Dependent Variable: VAR00002

|           | (I)<br>VAR0<br>0001 | (J)<br>VAR0<br>0001 | Mean<br>Difference (I-<br>J) | Std. Error | Sig. | 95% Confidence Interval |             |
|-----------|---------------------|---------------------|------------------------------|------------|------|-------------------------|-------------|
|           |                     |                     |                              |            |      | Lower Bound             | Upper Bound |
| Tukey HSD | 4                   | 3                   | 127.88462 *                  | 17.02178   | .000 | 73.3749                 | 182.3944    |
| LSD       | 1                   | 2                   | -150.53000 *                 | 17.02178   | .000 | -189.7823               | -111.2777   |
|           |                     | 3                   | 8.68333                      | 17.02178   | .624 | -30.5690                | 47.9356     |
|           |                     | 4                   | -119.20129 *                 | 17.02178   | .000 | -158.4536               | -79.9490    |
|           | 2                   | 1                   | 150.53000 *                  | 17.02178   | .000 | 111.2777                | 189.7823    |
|           |                     | 3                   | 159.21333 *                  | 17.02178   | .000 | 119.9610                | 198.4656    |
|           |                     | 4                   | 31.32871                     | 17.02178   | .103 | -7.9236                 | 70.5810     |
|           | 3                   | 1                   | -8.68333                     | 17.02178   | .624 | -47.9356                | 30.5690     |
|           |                     | 2                   | -159.21333 *                 | 17.02178   | .000 | -198.4656               | -119.9610   |
|           |                     | 4                   | -127.88462 *                 | 17.02178   | .000 | -167.1369               | -88.6323    |
|           | 4                   | 1                   | 119.20129 *                  | 17.02178   | .000 | 79.9490                 | 158.4536    |
|           |                     | 2                   | -31.32871                    | 17.02178   | .103 | -70.5810                | 7.9236      |
|           |                     | 3                   | 127.88462 *                  | 17.02178   | .000 | 88.6323                 | 167.1369    |

\*. The mean difference is significant at the 0.05 level.

### Homogeneous Subsets

VAR00002

|                           | VAR0<br>0001 | N | Subset for alpha = 0.05 |          |
|---------------------------|--------------|---|-------------------------|----------|
|                           |              |   | 1                       | 2        |
| Tukey<br>HSD <sup>a</sup> | 3            | 3 | 58.9433                 |          |
|                           | 1            | 3 | 67.6267                 |          |
|                           | 4            | 3 |                         | 186.8280 |
|                           | 2            | 3 |                         | 218.1567 |
|                           | Sig.         |   | .954                    | .323     |
| Duncan <sup>a</sup>       | 3            | 3 | 58.9433                 |          |
|                           | 1            | 3 | 67.6267                 |          |
|                           | 4            | 3 |                         | 186.8280 |
|                           | 2            | 3 |                         | 218.1567 |
|                           | Sig.         |   | .624                    | .103     |

Means for groups in homogeneous subsets are displayed.

a. Uses Harmonic Mean Sample Size = 3.000.
