# Supplementary material for: Comparative Transcriptome Analysis of Onion in Response to Infection by Alternaria porri (Ellis) Cifferi
Source: Frontiers journal article supplement (doi:10.3389/fpls.2022.857306), 2022-04-11
Supplement: Data_Sheet_3.ZIP [file Data_Sheet_3.ZIP]

```

ONEWAY VAR00002 BY VAR00001
  /STATISTICS DESCRIPTIVES HOMOGENEITY
  /MISSING ANALYSIS
  /POSTHOC=TUKEY DUNCAN LSD ALPHA(0.05) .

```

## Oneway

### Notes

|                        |                                                                                                                                          |                                                                                                        |  |
|------------------------|------------------------------------------------------------------------------------------------------------------------------------------|--------------------------------------------------------------------------------------------------------|--|
| Output Created         |                                                                                                                                          | 13-Feb-2022 17:35:02                                                                                   |  |
| Comments               |                                                                                                                                          |                                                                                                        |  |
| Input                  | Active Dataset                                                                                                                           | DataSet0                                                                                               |  |
|                        | Filter                                                                                                                                   | <none>                                                                                                 |  |
|                        | Weight                                                                                                                                   | <none>                                                                                                 |  |
|                        | Split File                                                                                                                               | <none>                                                                                                 |  |
|                        | N of Rows in Working Data File                                                                                                           | 12                                                                                                     |  |
| Missing Value Handling | Definition of Missing                                                                                                                    | User-defined missing values are treated as missing.                                                    |  |
|                        | Cases Used                                                                                                                               | Statistics for each analysis are based on cases with no missing data for any variable in the analysis. |  |
| Syntax                 | ONEWAY VAR00002 BY VAR00001<br>/STATISTICS DESCRIPTIVES<br>HOMOGENEITY<br>/MISSING ANALYSIS<br>/POSTHOC=TUKEY DUNCAN LSD<br>ALPHA(0.05). |                                                                                                        |  |
| Resources              | Processor Time                                                                                                                           | 00:00:00.031                                                                                           |  |
|                        | Elapsed Time                                                                                                                             | 00:00:00.062                                                                                           |  |

[DataSet0]

### Descriptives

VAR00002

|   | N | Mean   | Std. Deviation | Std. Error | 95% Confidence Interval for Mean |             | Minimum | Maximum |
|---|---|--------|----------------|------------|----------------------------------|-------------|---------|---------|
|   |   |        |                |            | Lower Bound                      | Upper Bound |         |         |
| 1 | 3 | 1.2877 | .49733         | .28713     | .0522                            | 2.5231      | .84     | 1.82    |
| 2 | 3 | 4.3000 | .55678         | .32146     | 2.9169                           | 5.6831      | 3.80    | 4.90    |
| 3 | 3 | 1.2300 | .12124         | .07000     | .9288                            | 1.5312      | 1.09    | 1.30    |

### Descriptives

VAR00002

|       | N  | Mean   | Std. Deviation | Std. Error | 95% Confidence Interval for Mean |             | Minimum | Maximum |
|-------|----|--------|----------------|------------|----------------------------------|-------------|---------|---------|
|       |    |        |                |            | Lower Bound                      | Upper Bound |         |         |
| 4     | 3  | 2.7667 | .47721         | .27552     | 1.5812                           | 3.9521      | 2.22    | 3.10    |
| Total | 12 | 2.3961 | 1.37018        | .39554     | 1.5255                           | 3.2667      | .84     | 4.90    |

### Test of Homogeneity of Variances

VAR00002

| Levene Statistic | df1 | df2 | Sig. |
|------------------|-----|-----|------|
| 1.536            | 3   | 8   | .279 |

### ANOVA

VAR00002

|                | Sum of Squares | df | Mean Square | F      | Sig. |
|----------------|----------------|----|-------------|--------|------|
| Between Groups | 19.052         | 3  | 6.351       | 31.762 | .000 |
| Within Groups  | 1.600          | 8  | .200        |        |      |
| Total          | 20.651         | 11 |             |        |      |

## Post Hoc Tests

### Multiple Comparisons

Dependent Variable: VAR00002

|           | (I) VAR00001 | (J) VAR00001 | Mean Difference (I-J) | Std. Error | Sig. | 95% Confidence Interval |             |
|-----------|--------------|--------------|-----------------------|------------|------|-------------------------|-------------|
|           |              |              |                       |            |      | Lower Bound             | Upper Bound |
| Tukey HSD | 1            | 2            | -3.01233*             | .36510     | .000 | -4.1815                 | -1.8432     |
|           |              | 3            | .05767                | .36510     | .998 | -1.1115                 | 1.2268      |
|           |              | 4            | -1.47900*             | .36510     | .016 | -2.6482                 | -.3098      |
|           | 2            | 1            | 3.01233*              | .36510     | .000 | 1.8432                  | 4.1815      |
|           |              | 3            | 3.07000*              | .36510     | .000 | 1.9008                  | 4.2392      |
|           |              | 4            | 1.53333*              | .36510     | .013 | .3642                   | 2.7025      |
|           | 3            | 1            | -.05767               | .36510     | .998 | -1.2268                 | 1.1115      |
|           |              | 2            | -3.07000*             | .36510     | .000 | -4.2392                 | -1.9008     |
|           |              | 4            | -1.53667*             | .36510     | .013 | -2.7058                 | -.3675      |
|           | 4            | 1            | 1.47900*              | .36510     | .016 | .3098                   | 2.6482      |
|           |              | 2            | -1.53333*             | .36510     | .013 | -2.7025                 | -.3642      |

\*. The mean difference is significant at the 0.05 level.

### Multiple Comparisons

Dependent Variable: VAR00002

|           | (I)<br>VAR0<br>0001 | (J)<br>VAR0<br>0001 | Mean<br>Difference (I-<br>J) | Std. Error | Sig. | 95% Confidence Interval |             |
|-----------|---------------------|---------------------|------------------------------|------------|------|-------------------------|-------------|
|           |                     |                     |                              |            |      | Lower Bound             | Upper Bound |
| Tukey HSD | 4                   | 3                   | 1.53667 <sup>*</sup>         | .36510     | .013 | .3675                   | 2.7058      |
| LSD       | 1                   | 2                   | -3.01233 <sup>*</sup>        | .36510     | .000 | -3.8542                 | -2.1704     |
|           |                     | 3                   | .05767                       | .36510     | .878 | -.7842                  | .8996       |
|           |                     | 4                   | -1.47900 <sup>*</sup>        | .36510     | .004 | -2.3209                 | -.6371      |
|           | 2                   | 1                   | 3.01233 <sup>*</sup>         | .36510     | .000 | 2.1704                  | 3.8542      |
|           |                     | 3                   | 3.07000 <sup>*</sup>         | .36510     | .000 | 2.2281                  | 3.9119      |
|           |                     | 4                   | 1.53333 <sup>*</sup>         | .36510     | .003 | .6914                   | 2.3752      |
|           | 3                   | 1                   | -.05767                      | .36510     | .878 | -.8996                  | .7842       |
|           |                     | 2                   | -3.07000 <sup>*</sup>        | .36510     | .000 | -3.9119                 | -2.2281     |
|           |                     | 4                   | -1.53667 <sup>*</sup>        | .36510     | .003 | -2.3786                 | -.6948      |
|           | 4                   | 1                   | 1.47900 <sup>*</sup>         | .36510     | .004 | .6371                   | 2.3209      |
|           |                     | 2                   | -1.53333 <sup>*</sup>        | .36510     | .003 | -2.3752                 | -.6914      |
|           |                     | 3                   | 1.53667 <sup>*</sup>         | .36510     | .003 | .6948                   | 2.3786      |

\*. The mean difference is significant at the 0.05 level.

### Homogeneous Subsets

VAR00002

|                           | VAR0<br>0001 | N | Subset for alpha = 0.05 |        |        |
|---------------------------|--------------|---|-------------------------|--------|--------|
|                           |              |   | 1                       | 2      | 3      |
| Tukey<br>HSD <sup>a</sup> | 3            | 3 | 1.2300                  | 2.7667 | 4.3000 |
|                           | 1            | 3 | 1.2877                  |        |        |
|                           | 4            | 3 |                         |        |        |
|                           | 2            | 3 |                         |        |        |
|                           | Sig.         |   | .998                    | 1.000  | 1.000  |
| Duncan <sup>a</sup>       | 3            | 3 | 1.2300                  | 2.7667 | 4.3000 |
|                           | 1            | 3 | 1.2877                  |        |        |
|                           | 4            | 3 |                         |        |        |
|                           | 2            | 3 |                         |        |        |
|                           | Sig.         |   | .878                    | 1.000  | 1.000  |

Means for groups in homogeneous subsets are displayed.

a. Uses Harmonic Mean Sample Size = 3.000.
