# Supplementary material for: Comparative Transcriptome Analysis of Onion in Response to Infection by Alternaria porri (Ellis) Cifferi
Source: Frontiers journal article supplement (doi:10.3389/fpls.2022.857306), 2022-04-11
Supplement: Data_Sheet_3.ZIP [file Data_Sheet_3.ZIP]

```

ONEWAY VAR00002 BY VAR00001
  /STATISTICS DESCRIPTIVES HOMOGENEITY
  /MISSING ANALYSIS
  /POSTHOC=TUKEY DUNCAN LSD ALPHA(0.05) .

```

## Oneway

### Notes

|                        |                                                                                                                                          |                                                                                                        |
|------------------------|------------------------------------------------------------------------------------------------------------------------------------------|--------------------------------------------------------------------------------------------------------|
| Output Created         | 13-Feb-2022 17:50:10                                                                                                                     |                                                                                                        |
| Comments               |                                                                                                                                          |                                                                                                        |
| Input                  | Active Dataset                                                                                                                           | DataSet0                                                                                               |
|                        | Filter                                                                                                                                   | <none>                                                                                                 |
|                        | Weight                                                                                                                                   | <none>                                                                                                 |
|                        | Split File                                                                                                                               | <none>                                                                                                 |
|                        | N of Rows in Working Data File                                                                                                           | 12                                                                                                     |
| Missing Value Handling | Definition of Missing                                                                                                                    | User-defined missing values are treated as missing.                                                    |
|                        | Cases Used                                                                                                                               | Statistics for each analysis are based on cases with no missing data for any variable in the analysis. |
| Syntax                 | ONEWAY VAR00002 BY VAR00001<br>/STATISTICS DESCRIPTIVES<br>HOMOGENEITY<br>/MISSING ANALYSIS<br>/POSTHOC=TUKEY DUNCAN LSD<br>ALPHA(0.05). |                                                                                                        |
| Resources              | Processor Time                                                                                                                           | 00:00:00.047                                                                                           |
|                        | Elapsed Time                                                                                                                             | 00:00:00.033                                                                                           |

[DataSet0]

### Descriptives

VAR00002

|   | N | Mean     | Std. Deviation | Std. Error | 95% Confidence Interval for Mean |             | Minimum | Maximum |
|---|---|----------|----------------|------------|----------------------------------|-------------|---------|---------|
|   |   |          |                |            | Lower Bound                      | Upper Bound |         |         |
| 1 | 3 | 56.6967  | 7.35469        | 4.24623    | 38.4266                          | 74.9667     | 48.39   | 62.38   |
| 2 | 3 | 1.2299E2 | 10.18676       | 5.88133    | 97.6847                          | 148.2953    | 112.24  | 132.50  |

## Descriptives

VAR00002

|       | N  | Mean     | Std. Deviation | Std. Error | 95% Confidence Interval for Mean |             | Minimum | Maximum |
|-------|----|----------|----------------|------------|----------------------------------|-------------|---------|---------|
|       |    |          |                |            | Lower Bound                      | Upper Bound |         |         |
| 3     | 3  | 58.3633  | 10.20065       | 5.88935    | 33.0235                          | 83.7032     | 48.23   | 68.63   |
| 4     | 3  | 2.5602E2 | 9.42148        | 5.43949    | 232.6124                         | 279.4209    | 246.40  | 265.23  |
| Total | 12 | 1.2352E2 | 85.01366       | 24.54133   | 69.5016                          | 177.5318    | 48.23   | 265.23  |

## Test of Homogeneity of Variances

VAR00002

| Levene Statistic | df1 | df2 | Sig. |
|------------------|-----|-----|------|
| .063             | 3   | 8   | .978 |

## ANOVA

VAR00002

|                | Sum of Squares | df | Mean Square | F       | Sig. |
|----------------|----------------|----|-------------|---------|------|
| Between Groups | 78799.190      | 3  | 26266.397   | 299.606 | .000 |
| Within Groups  | 701.358        | 8  | 87.670      |         |      |
| Total          | 79500.548      | 11 |             |         |      |

## Post Hoc Tests

### Multiple Comparisons

Dependent Variable: VAR00002

|           | (I) | (J) | Mean Difference (I-J) | Std. Error | Sig. | 95% Confidence Interval |             |
|-----------|-----|-----|-----------------------|------------|------|-------------------------|-------------|
|           |     |     |                       |            |      | Lower Bound             | Upper Bound |
| Tukey HSD | 1   | 2   | -66.29333 *           | 7.64503    | .000 | -90.7754                | -41.8112    |
|           |     | 3   | -1.66667              | 7.64503    | .996 | -26.1488                | 22.8154     |
|           |     | 4   | -199.32000 *          | 7.64503    | .000 | -223.8021               | -174.8379   |
|           | 2   | 1   | 66.29333 *            | 7.64503    | .000 | 41.8112                 | 90.7754     |
|           |     | 3   | 64.62667 *            | 7.64503    | .000 | 40.1446                 | 89.1088     |
|           |     | 4   | -133.02667 *          | 7.64503    | .000 | -157.5088               | -108.5446   |
|           | 3   | 1   | 1.66667               | 7.64503    | .996 | -22.8154                | 26.1488     |
|           |     | 2   | -64.62667 *           | 7.64503    | .000 | -89.1088                | -40.1446    |
|           |     | 4   | -197.65333 *          | 7.64503    | .000 | -222.1354               | -173.1712   |
|           | 4   | 1   | 199.32000 *           | 7.64503    | .000 | 174.8379                | 223.8021    |

\*. The mean difference is significant at the 0.05 level.

### Multiple Comparisons

Dependent Variable: VAR00002

|           | (I)<br>VAR0<br>0001 | (J)<br>VAR0<br>0001 | Mean<br>Difference (I-<br>J) | Std. Error | Sig. | 95% Confidence Interval |             |
|-----------|---------------------|---------------------|------------------------------|------------|------|-------------------------|-------------|
|           |                     |                     |                              |            |      | Lower Bound             | Upper Bound |
| Tukey HSD | 4                   | 2                   | 133.02667 *                  | 7.64503    | .000 | 108.5446                | 157.5088    |
|           |                     | 3                   | 197.65333 *                  | 7.64503    | .000 | 173.1712                | 222.1354    |
| LSD       | 1                   | 2                   | -66.29333 *                  | 7.64503    | .000 | -83.9228                | -48.6639    |
|           |                     | 3                   | -1.66667                     | 7.64503    | .833 | -19.2961                | 15.9628     |
|           |                     | 4                   | -199.32000 *                 | 7.64503    | .000 | -216.9495               | -181.6905   |
|           | 2                   | 1                   | 66.29333 *                   | 7.64503    | .000 | 48.6639                 | 83.9228     |
|           |                     | 3                   | 64.62667 *                   | 7.64503    | .000 | 46.9972                 | 82.2561     |
|           |                     | 4                   | -133.02667 *                 | 7.64503    | .000 | -150.6561               | -115.3972   |
|           | 3                   | 1                   | 1.66667                      | 7.64503    | .833 | -15.9628                | 19.2961     |
|           |                     | 2                   | -64.62667 *                  | 7.64503    | .000 | -82.2561                | -46.9972    |
|           |                     | 4                   | -197.65333 *                 | 7.64503    | .000 | -215.2828               | -180.0239   |
|           | 4                   | 1                   | 199.32000 *                  | 7.64503    | .000 | 181.6905                | 216.9495    |
|           |                     | 2                   | 133.02667 *                  | 7.64503    | .000 | 115.3972                | 150.6561    |
|           |                     | 3                   | 197.65333 *                  | 7.64503    | .000 | 180.0239                | 215.2828    |

\*. The mean difference is significant at the 0.05 level.

### Homogeneous Subsets

VAR00002

|                           | VAR0<br>0001 | N | Subset for alpha = 0.05 |          |          |
|---------------------------|--------------|---|-------------------------|----------|----------|
|                           |              |   | 1                       | 2        | 3        |
| Tukey<br>HSD <sup>a</sup> | 1            | 3 | 56.6967                 | 1.2299E2 | 2.5602E2 |
|                           | 3            | 3 | 58.3633                 |          |          |
|                           | 2            | 3 |                         |          |          |
|                           | 4            | 3 |                         |          |          |
|                           | Sig.         |   | .996                    | 1.000    | 1.000    |
| Duncan <sup>a</sup>       | 1            | 3 | 56.6967                 | 1.2299E2 | 2.5602E2 |
|                           | 3            | 3 | 58.3633                 |          |          |
|                           | 2            | 3 |                         |          |          |
|                           | 4            | 3 |                         |          |          |
|                           | Sig.         |   | .833                    | 1.000    | 1.000    |

Means for groups in homogeneous subsets are displayed.

a. Uses Harmonic Mean Sample Size = 3.000.

```

ONEWAY VAR00002 BY VAR00001
  /STATISTICS DESCRIPTIVES HOMOGENEITY
  /MISSING ANALYSIS
  /POSTHOC=TUKEY DUNCAN LSD ALPHA(0.05) .

```

## Oneway

### Notes

|                        |                                                                                                                                          |                                                                                                        |
|------------------------|------------------------------------------------------------------------------------------------------------------------------------------|--------------------------------------------------------------------------------------------------------|
| Output Created         | 13-Feb-2022 17:51:47                                                                                                                     |                                                                                                        |
| Comments               |                                                                                                                                          |                                                                                                        |
| Input                  | Active Dataset                                                                                                                           | DataSet0                                                                                               |
|                        | Filter                                                                                                                                   | <none>                                                                                                 |
|                        | Weight                                                                                                                                   | <none>                                                                                                 |
|                        | Split File                                                                                                                               | <none>                                                                                                 |
|                        | N of Rows in Working Data File                                                                                                           | 12                                                                                                     |
| Missing Value Handling | Definition of Missing                                                                                                                    | User-defined missing values are treated as missing.                                                    |
|                        | Cases Used                                                                                                                               | Statistics for each analysis are based on cases with no missing data for any variable in the analysis. |
| Syntax                 | ONEWAY VAR00002 BY VAR00001<br>/STATISTICS DESCRIPTIVES<br>HOMOGENEITY<br>/MISSING ANALYSIS<br>/POSTHOC=TUKEY DUNCAN LSD<br>ALPHA(0.05). |                                                                                                        |
| Resources              | Processor Time                                                                                                                           | 00:00:00.031                                                                                           |
|                        | Elapsed Time                                                                                                                             | 00:00:00.015                                                                                           |

[DataSet0]

### Descriptives

VAR00002

|   | N | Mean     | Std. Deviation | Std. Error | 95% Confidence Interval for Mean |             | Minimum | Maximum |
|---|---|----------|----------------|------------|----------------------------------|-------------|---------|---------|
|   |   |          |                |            | Lower Bound                      | Upper Bound |         |         |
| 1 | 3 | 56.6967  | 7.35469        | 4.24623    | 38.4266                          | 74.9667     | 48.39   | 62.38   |
| 2 | 3 | 1.2299E2 | 10.18676       | 5.88133    | 97.6847                          | 148.2953    | 112.24  | 132.50  |
| 3 | 3 | 58.3633  | 10.20065       | 5.88935    | 33.0235                          | 83.7032     | 48.23   | 68.63   |

### Descriptives

VAR00002

|       | N  | Mean     | Std. Deviation | Std. Error | 95% Confidence Interval for Mean |             | Minimum | Maximum |
|-------|----|----------|----------------|------------|----------------------------------|-------------|---------|---------|
|       |    |          |                |            | Lower Bound                      | Upper Bound |         |         |
| 4     | 3  | 2.5602E2 | 9.42148        | 5.43949    | 232.6124                         | 279.4209    | 246.40  | 265.23  |
| Total | 12 | 1.2352E2 | 85.01366       | 24.54133   | 69.5016                          | 177.5318    | 48.23   | 265.23  |

### Test of Homogeneity of Variances

VAR00002

| Levene Statistic | df1 | df2 | Sig. |
|------------------|-----|-----|------|
| .063             | 3   | 8   | .978 |

### ANOVA

VAR00002

|                | Sum of Squares | df | Mean Square | F       | Sig. |
|----------------|----------------|----|-------------|---------|------|
| Between Groups | 78799.190      | 3  | 26266.397   | 299.606 | .000 |
| Within Groups  | 701.358        | 8  | 87.670      |         |      |
| Total          | 79500.548      | 11 |             |         |      |

## Post Hoc Tests

### Multiple Comparisons

Dependent Variable: VAR00002

|           | (I) | (J) | Mean Difference (I-J) | Std. Error | Sig. | 95% Confidence Interval |             |
|-----------|-----|-----|-----------------------|------------|------|-------------------------|-------------|
|           |     |     |                       |            |      | Lower Bound             | Upper Bound |
| Tukey HSD | 1   | 2   | -66.29333 *           | 7.64503    | .000 | -90.7754                | -41.8112    |
|           |     | 3   | -1.66667              | 7.64503    | .996 | -26.1488                | 22.8154     |
|           |     | 4   | -199.32000 *          | 7.64503    | .000 | -223.8021               | -174.8379   |
|           | 2   | 1   | 66.29333 *            | 7.64503    | .000 | 41.8112                 | 90.7754     |
|           |     | 3   | 64.62667 *            | 7.64503    | .000 | 40.1446                 | 89.1088     |
|           |     | 4   | -133.02667 *          | 7.64503    | .000 | -157.5088               | -108.5446   |
|           | 3   | 1   | 1.66667               | 7.64503    | .996 | -22.8154                | 26.1488     |
|           |     | 2   | -64.62667 *           | 7.64503    | .000 | -89.1088                | -40.1446    |
|           |     | 4   | -197.65333 *          | 7.64503    | .000 | -222.1354               | -173.1712   |
|           | 4   | 1   | 199.32000 *           | 7.64503    | .000 | 174.8379                | 223.8021    |
|           |     | 2   | 133.02667 *           | 7.64503    | .000 | 108.5446                | 157.5088    |

\*. The mean difference is significant at the 0.05 level.

### Multiple Comparisons

Dependent Variable: VAR00002

|           | (I)<br>VAR0<br>0001 | (J)<br>VAR0<br>0001 | Mean<br>Difference (I-<br>J) | Std. Error | Sig. | 95% Confidence Interval |             |
|-----------|---------------------|---------------------|------------------------------|------------|------|-------------------------|-------------|
|           |                     |                     |                              |            |      | Lower Bound             | Upper Bound |
| Tukey HSD | 4                   | 3                   | 197.65333 *                  | 7.64503    | .000 | 173.1712                | 222.1354    |
| LSD       | 1                   | 2                   | -66.29333 *                  | 7.64503    | .000 | -83.9228                | -48.6639    |
|           |                     | 3                   | -1.66667                     | 7.64503    | .833 | -19.2961                | 15.9628     |
|           |                     | 4                   | -199.32000 *                 | 7.64503    | .000 | -216.9495               | -181.6905   |
|           | 2                   | 1                   | 66.29333 *                   | 7.64503    | .000 | 48.6639                 | 83.9228     |
|           |                     | 3                   | 64.62667 *                   | 7.64503    | .000 | 46.9972                 | 82.2561     |
|           |                     | 4                   | -133.02667 *                 | 7.64503    | .000 | -150.6561               | -115.3972   |
|           | 3                   | 1                   | 1.66667                      | 7.64503    | .833 | -15.9628                | 19.2961     |
|           |                     | 2                   | -64.62667 *                  | 7.64503    | .000 | -82.2561                | -46.9972    |
|           |                     | 4                   | -197.65333 *                 | 7.64503    | .000 | -215.2828               | -180.0239   |
|           | 4                   | 1                   | 199.32000 *                  | 7.64503    | .000 | 181.6905                | 216.9495    |
|           |                     | 2                   | 133.02667 *                  | 7.64503    | .000 | 115.3972                | 150.6561    |
|           |                     | 3                   | 197.65333 *                  | 7.64503    | .000 | 180.0239                | 215.2828    |

\*. The mean difference is significant at the 0.05 level.

### Homogeneous Subsets

VAR00002

|                           | VAR0<br>0001 | N | Subset for alpha = 0.05 |          |          |
|---------------------------|--------------|---|-------------------------|----------|----------|
|                           |              |   | 1                       | 2        | 3        |
| Tukey<br>HSD <sup>a</sup> | 1            | 3 | 56.6967                 | 1.2299E2 | 2.5602E2 |
|                           | 3            | 3 | 58.3633                 |          |          |
|                           | 2            | 3 |                         |          |          |
|                           | 4            | 3 |                         |          |          |
|                           | Sig.         |   | .996                    | 1.000    | 1.000    |
| Duncan <sup>a</sup>       | 1            | 3 | 56.6967                 | 1.2299E2 | 2.5602E2 |
|                           | 3            | 3 | 58.3633                 |          |          |
|                           | 2            | 3 |                         |          |          |
|                           | 4            | 3 |                         |          |          |
|                           | Sig.         |   | .833                    | 1.000    | 1.000    |

Means for groups in homogeneous subsets are displayed.

a. Uses Harmonic Mean Sample Size = 3.000.
