# Supplementary material for: Comparative Transcriptome Analysis of Onion in Response to Infection by Alternaria porri (Ellis) Cifferi
Source: Frontiers journal article supplement (doi:10.3389/fpls.2022.857306), 2022-04-11
Supplement: Data_Sheet_3.ZIP [file Data_Sheet_3.ZIP]

```

ONEWAY VAR00002 BY VAR00001
  /STATISTICS DESCRIPTIVES HOMOGENEITY
  /MISSING ANALYSIS
  /POSTHOC=TUKEY DUNCAN LSD ALPHA(0.05) .

```

## Oneway

### Notes

|                        |                                                                                                                                          |                                                                                                        |
|------------------------|------------------------------------------------------------------------------------------------------------------------------------------|--------------------------------------------------------------------------------------------------------|
| Output Created         | 13-Feb-2022 18:20:52                                                                                                                     |                                                                                                        |
| Comments               |                                                                                                                                          |                                                                                                        |
| Input                  | Active Dataset                                                                                                                           | DataSet0                                                                                               |
|                        | Filter                                                                                                                                   | <none>                                                                                                 |
|                        | Weight                                                                                                                                   | <none>                                                                                                 |
|                        | Split File                                                                                                                               | <none>                                                                                                 |
|                        | N of Rows in Working Data File                                                                                                           | 12                                                                                                     |
| Missing Value Handling | Definition of Missing                                                                                                                    | User-defined missing values are treated as missing.                                                    |
|                        | Cases Used                                                                                                                               | Statistics for each analysis are based on cases with no missing data for any variable in the analysis. |
| Syntax                 | ONEWAY VAR00002 BY VAR00001<br>/STATISTICS DESCRIPTIVES<br>HOMOGENEITY<br>/MISSING ANALYSIS<br>/POSTHOC=TUKEY DUNCAN LSD<br>ALPHA(0.05). |                                                                                                        |
| Resources              | Processor Time                                                                                                                           | 00:00:00.078                                                                                           |
|                        | Elapsed Time                                                                                                                             | 00:00:00.029                                                                                           |

[DataSet0]

### Descriptives

VAR00002

|   | N | Mean   | Std. Deviation | Std. Error | 95% Confidence Interval for Mean |             | Minimum | Maximum |
|---|---|--------|----------------|------------|----------------------------------|-------------|---------|---------|
|   |   |        |                |            | Lower Bound                      | Upper Bound |         |         |
| 1 | 3 | .8702  | .17575         | .10147     | .4336                            | 1.3067      | .69     | 1.04    |
| 2 | 3 | 1.8622 | .14970         | .08643     | 1.4903                           | 2.2341      | 1.76    | 2.03    |
| 3 | 3 | .8919  | .18943         | .10937     | .4213                            | 1.3625      | .70     | 1.08    |

### Descriptives

VAR00002

|       | N  | Mean   | Std. Deviation | Std. Error | 95% Confidence Interval for Mean |             | Minimum | Maximum |
|-------|----|--------|----------------|------------|----------------------------------|-------------|---------|---------|
|       |    |        |                |            | Lower Bound                      | Upper Bound |         |         |
| 4     | 3  | 2.5842 | .59312         | .34244     | 1.1108                           | 4.0575      | 1.90    | 2.99    |
| Total | 12 | 1.5521 | .80162         | .23141     | 1.0428                           | 2.0614      | .69     | 2.99    |

### Test of Homogeneity of Variances

VAR00002

| Levene Statistic | df1 | df2 | Sig. |
|------------------|-----|-----|------|
| 5.032            | 3   | 8   | .030 |

### ANOVA

VAR00002

|                | Sum of Squares | df | Mean Square | F      | Sig. |
|----------------|----------------|----|-------------|--------|------|
| Between Groups | 6.187          | 3  | 2.062       | 18.706 | .001 |
| Within Groups  | .882           | 8  | .110        |        |      |
| Total          | 7.068          | 11 |             |        |      |

## Post Hoc Tests

### Multiple Comparisons

Dependent Variable: VAR00002

|           | (I) VAR00001 | (J) VAR00001 | Mean Difference (I-J) | Std. Error | Sig.  | 95% Confidence Interval |             |
|-----------|--------------|--------------|-----------------------|------------|-------|-------------------------|-------------|
|           |              |              |                       |            |       | Lower Bound             | Upper Bound |
| Tukey HSD | 1            | 2            | -.99201*              | .27110     | .026  | -1.8602                 | -.1239      |
|           |              | 3            | -.02176               | .27110     | 1.000 | -.8899                  | .8464       |
|           |              | 4            | -1.71400*             | .27110     | .001  | -2.5822                 | -.8458      |
|           | 2            | 1            | .99201*               | .27110     | .026  | .1239                   | 1.8602      |
|           |              | 3            | .97025*               | .27110     | .030  | .1021                   | 1.8384      |
|           |              | 4            | -.72199               | .27110     | .107  | -1.5902                 | .1462       |
|           | 3            | 1            | .02176                | .27110     | 1.000 | -.8464                  | .8899       |
|           |              | 2            | -.97025*              | .27110     | .030  | -1.8384                 | -.1021      |
|           |              | 4            | -1.69224*             | .27110     | .001  | -2.5604                 | -.8241      |
|           | 4            | 1            | 1.71400*              | .27110     | .001  | .8458                   | 2.5822      |
|           |              | 2            | .72199                | .27110     | .107  | -.1462                  | 1.5902      |

\*. The mean difference is significant at the 0.05 level.

### Multiple Comparisons

Dependent Variable: VAR00002

|           | (I)<br>VAR0<br>0001 | (J)<br>VAR0<br>0001 | Mean<br>Difference (I-<br>J) | Std. Error | Sig. | 95% Confidence Interval |             |
|-----------|---------------------|---------------------|------------------------------|------------|------|-------------------------|-------------|
|           |                     |                     |                              |            |      | Lower Bound             | Upper Bound |
| Tukey HSD | 4                   | 3                   | 1.69224 *                    | .27110     | .001 | .8241                   | 2.5604      |
| LSD       | 1                   | 2                   | -.99201 *                    | .27110     | .006 | -1.6172                 | -.3669      |
|           |                     | 3                   | -.02176                      | .27110     | .938 | -.6469                  | .6034       |
|           |                     | 4                   | -1.71400 *                   | .27110     | .000 | -2.3392                 | -1.0888     |
|           | 2                   | 1                   | .99201 *                     | .27110     | .006 | .3669                   | 1.6172      |
|           |                     | 3                   | .97025 *                     | .27110     | .007 | .3451                   | 1.5954      |
|           |                     | 4                   | -.72199 *                    | .27110     | .029 | -1.3472                 | -.0968      |
|           | 3                   | 1                   | .02176                       | .27110     | .938 | -.6034                  | .6469       |
|           |                     | 2                   | -.97025 *                    | .27110     | .007 | -1.5954                 | -.3451      |
|           |                     | 4                   | -1.69224 *                   | .27110     | .000 | -2.3174                 | -1.0671     |
|           | 4                   | 1                   | 1.71400 *                    | .27110     | .000 | 1.0888                  | 2.3392      |
|           |                     | 2                   | .72199 *                     | .27110     | .029 | .0968                   | 1.3472      |
|           |                     | 3                   | 1.69224 *                    | .27110     | .000 | 1.0671                  | 2.3174      |

\*. The mean difference is significant at the 0.05 level.

### Homogeneous Subsets

VAR00002

|                           | VAR0<br>0001 | N | Subset for alpha = 0.05 |        |        |
|---------------------------|--------------|---|-------------------------|--------|--------|
|                           |              |   | 1                       | 2      | 3      |
| Tukey<br>HSD <sup>a</sup> | 1            | 3 | .8702                   |        |        |
|                           | 3            | 3 | .8919                   |        |        |
|                           | 2            | 3 |                         | 1.8622 |        |
|                           | 4            | 3 |                         | 2.5842 |        |
|                           | Sig.         |   | 1.000                   | .107   |        |
| Duncan <sup>a</sup>       | 1            | 3 | .8702                   |        |        |
|                           | 3            | 3 | .8919                   |        |        |
|                           | 2            | 3 |                         | 1.8622 |        |
|                           | 4            | 3 |                         |        | 2.5842 |
|                           | Sig.         |   | .938                    | 1.000  | 1.000  |

Means for groups in homogeneous subsets are displayed.

a. Uses Harmonic Mean Sample Size = 3.000.
