# Supplementary material for: Comparative Transcriptome Analysis of Onion in Response to Infection by Alternaria porri (Ellis) Cifferi
Source: Frontiers journal article supplement (doi:10.3389/fpls.2022.857306), 2022-04-11
Supplement: Data_Sheet_3.ZIP [file Data_Sheet_3.ZIP]

```

ONEWAY VAR00002 BY VAR00001
  /STATISTICS DESCRIPTIVES HOMOGENEITY
  /MISSING ANALYSIS
  /POSTHOC=TUKEY DUNCAN LSD ALPHA(0.05) .

```

## Oneway

### Notes

|                        |                                                                                                                                          |                                                                                                        |
|------------------------|------------------------------------------------------------------------------------------------------------------------------------------|--------------------------------------------------------------------------------------------------------|
| Output Created         | 13-Feb-2022 18:00:58                                                                                                                     |                                                                                                        |
| Comments               |                                                                                                                                          |                                                                                                        |
| Input                  | Active Dataset                                                                                                                           | DataSet0                                                                                               |
|                        | Filter                                                                                                                                   | <none>                                                                                                 |
|                        | Weight                                                                                                                                   | <none>                                                                                                 |
|                        | Split File                                                                                                                               | <none>                                                                                                 |
|                        | N of Rows in Working Data File                                                                                                           | 12                                                                                                     |
| Missing Value Handling | Definition of Missing                                                                                                                    | User-defined missing values are treated as missing.                                                    |
|                        | Cases Used                                                                                                                               | Statistics for each analysis are based on cases with no missing data for any variable in the analysis. |
| Syntax                 | ONEWAY VAR00002 BY VAR00001<br>/STATISTICS DESCRIPTIVES<br>HOMOGENEITY<br>/MISSING ANALYSIS<br>/POSTHOC=TUKEY DUNCAN LSD<br>ALPHA(0.05). |                                                                                                        |
| Resources              | Processor Time                                                                                                                           | 00:00:00.063                                                                                           |
|                        | Elapsed Time                                                                                                                             | 00:00:00.032                                                                                           |

[DataSet0]

### Descriptives

VAR00002

|   | N | Mean    | Std. Deviation | Std. Error | 95% Confidence Interval for Mean |             | Minimum | Maximum |
|---|---|---------|----------------|------------|----------------------------------|-------------|---------|---------|
|   |   |         |                |            | Lower Bound                      | Upper Bound |         |         |
| 1 | 3 | 24.5867 | 4.22418        | 2.43883    | 14.0932                          | 35.0801     | 21.20   | 29.32   |
| 2 | 3 | 59.3533 | 6.98911        | 4.03516    | 41.9914                          | 76.7152     | 52.23   | 66.20   |
| 3 | 3 | 32.2733 | 5.94004        | 3.42949    | 17.5174                          | 47.0292     | 26.32   | 38.20   |

### Descriptives

VAR00002

|       | N  | Mean    | Std. Deviation | Std. Error | 95% Confidence Interval for Mean |             | Minimum | Maximum |
|-------|----|---------|----------------|------------|----------------------------------|-------------|---------|---------|
|       |    |         |                |            | Lower Bound                      | Upper Bound |         |         |
| 4     | 3  | 88.2533 | 7.58694        | 4.38032    | 69.4063                          | 107.1003    | 81.23   | 96.30   |
| Total | 12 | 51.1167 | 26.69139       | 7.70514    | 34.1578                          | 68.0756     | 21.20   | 96.30   |

### Test of Homogeneity of Variances

VAR00002

| Levene Statistic | df1 | df2 | Sig. |
|------------------|-----|-----|------|
| .250             | 3   | 8   | .859 |

### ANOVA

VAR00002

|                | Sum of Squares | df | Mean Square | F      | Sig. |
|----------------|----------------|----|-------------|--------|------|
| Between Groups | 7517.660       | 3  | 2505.887    | 62.829 | .000 |
| Within Groups  | 319.074        | 8  | 39.884      |        |      |
| Total          | 7836.735       | 11 |             |        |      |

## Post Hoc Tests

### Multiple Comparisons

Dependent Variable: VAR00002

|           | (I) VAR00001 | (J) VAR00001 | Mean Difference (I-J) | Std. Error | Sig. | 95% Confidence Interval |             |
|-----------|--------------|--------------|-----------------------|------------|------|-------------------------|-------------|
|           |              |              |                       |            |      | Lower Bound             | Upper Bound |
| Tukey HSD | 1            | 2            | -34.76667 *           | 5.15650    | .001 | -51.2796                | -18.2537    |
|           |              | 3            | -7.68667              | 5.15650    | .485 | -24.1996                | 8.8263      |
|           |              | 4            | -63.66667 *           | 5.15650    | .000 | -80.1796                | -47.1537    |
|           | 2            | 1            | 34.76667 *            | 5.15650    | .001 | 18.2537                 | 51.2796     |
|           |              | 3            | 27.08000 *            | 5.15650    | .003 | 10.5671                 | 43.5929     |
|           |              | 4            | -28.90000 *           | 5.15650    | .002 | -45.4129                | -12.3871    |
|           | 3            | 1            | 7.68667               | 5.15650    | .485 | -8.8263                 | 24.1996     |
|           |              | 2            | -27.08000 *           | 5.15650    | .003 | -43.5929                | -10.5671    |
|           |              | 4            | -55.98000 *           | 5.15650    | .000 | -72.4929                | -39.4671    |
|           | 4            | 1            | 63.66667 *            | 5.15650    | .000 | 47.1537                 | 80.1796     |
|           |              | 2            | 28.90000 *            | 5.15650    | .002 | 12.3871                 | 45.4129     |

\*. The mean difference is significant at the 0.05 level.

### Multiple Comparisons

Dependent Variable: VAR00002

|           | (I)<br>VAR0<br>0001 | (J)<br>VAR0<br>0001 | Mean<br>Difference (I-<br>J) | Std. Error | Sig. | 95% Confidence Interval |             |
|-----------|---------------------|---------------------|------------------------------|------------|------|-------------------------|-------------|
|           |                     |                     |                              |            |      | Lower Bound             | Upper Bound |
| Tukey HSD | 4                   | 3                   | 55.98000 *                   | 5.15650    | .000 | 39.4671                 | 72.4929     |
| LSD       | 1                   | 2                   | -34.76667 *                  | 5.15650    | .000 | -46.6576                | -22.8757    |
|           |                     | 3                   | -7.68667                     | 5.15650    | .174 | -19.5776                | 4.2043      |
|           |                     | 4                   | -63.66667 *                  | 5.15650    | .000 | -75.5576                | -51.7757    |
|           | 2                   | 1                   | 34.76667 *                   | 5.15650    | .000 | 22.8757                 | 46.6576     |
|           |                     | 3                   | 27.08000 *                   | 5.15650    | .001 | 15.1891                 | 38.9709     |
|           |                     | 4                   | -28.90000 *                  | 5.15650    | .001 | -40.7909                | -17.0091    |
|           | 3                   | 1                   | 7.68667                      | 5.15650    | .174 | -4.2043                 | 19.5776     |
|           |                     | 2                   | -27.08000 *                  | 5.15650    | .001 | -38.9709                | -15.1891    |
|           |                     | 4                   | -55.98000 *                  | 5.15650    | .000 | -67.8709                | -44.0891    |
|           | 4                   | 1                   | 63.66667 *                   | 5.15650    | .000 | 51.7757                 | 75.5576     |
|           |                     | 2                   | 28.90000 *                   | 5.15650    | .001 | 17.0091                 | 40.7909     |
|           |                     | 3                   | 55.98000 *                   | 5.15650    | .000 | 44.0891                 | 67.8709     |

\*. The mean difference is significant at the 0.05 level.

### Homogeneous Subsets

VAR00002

|                           | VAR0<br>0001 | N | Subset for alpha = 0.05 |         |         |
|---------------------------|--------------|---|-------------------------|---------|---------|
|                           |              |   | 1                       | 2       | 3       |
| Tukey<br>HSD <sup>a</sup> | 1            | 3 | 24.5867                 |         |         |
|                           | 3            | 3 | 32.2733                 |         |         |
|                           | 2            | 3 |                         | 59.3533 |         |
|                           | 4            | 3 |                         |         | 88.2533 |
|                           | Sig.         |   | .485                    | 1.000   | 1.000   |
| Duncan <sup>a</sup>       | 1            | 3 | 24.5867                 |         |         |
|                           | 3            | 3 | 32.2733                 |         |         |
|                           | 2            | 3 |                         | 59.3533 |         |
|                           | 4            | 3 |                         |         | 88.2533 |
|                           | Sig.         |   | .174                    | 1.000   | 1.000   |

Means for groups in homogeneous subsets are displayed.

a. Uses Harmonic Mean Sample Size = 3.000.
