# Supplementary material for: Comparative Transcriptome Analysis of Onion in Response to Infection by Alternaria porri (Ellis) Cifferi
Source: Frontiers journal article supplement (doi:10.3389/fpls.2022.857306), 2022-04-11
Supplement: Data_Sheet_4.ZIP [file Data_Sheet_4.ZIP]

```

ONEWAY VAR00002 BY VAR00001
  /STATISTICS DESCRIPTIVES HOMOGENEITY
  /MISSING ANALYSIS
  /POSTHOC=DUNCAN LSD ALPHA(0.05) .

```

## Oneway

### Notes

|                        |                                                                                                                                  |                                                                                                        |
|------------------------|----------------------------------------------------------------------------------------------------------------------------------|--------------------------------------------------------------------------------------------------------|
| Output Created         | 24-Feb-2022 12:19:42                                                                                                             |                                                                                                        |
| Comments               |                                                                                                                                  |                                                                                                        |
| Input                  | Active Dataset                                                                                                                   | DataSet0                                                                                               |
|                        | Filter                                                                                                                           | <none>                                                                                                 |
|                        | Weight                                                                                                                           | <none>                                                                                                 |
|                        | Split File                                                                                                                       | <none>                                                                                                 |
|                        | N of Rows in Working Data File                                                                                                   | 12                                                                                                     |
| Missing Value Handling | Definition of Missing                                                                                                            | User-defined missing values are treated as missing.                                                    |
|                        | Cases Used                                                                                                                       | Statistics for each analysis are based on cases with no missing data for any variable in the analysis. |
| Syntax                 | ONEWAY VAR00002 BY VAR00001<br>/STATISTICS DESCRIPTIVES<br>HOMOGENEITY<br>/MISSING ANALYSIS<br>/POSTHOC=DUNCAN LSD ALPHA (0.05). |                                                                                                        |
| Resources              | Processor Time                                                                                                                   | 00:00:00.031                                                                                           |
|                        | Elapsed Time                                                                                                                     | 00:00:00.020                                                                                           |

[DataSet0]

### Descriptives

VAR00002

|   | N | Mean   | Std. Deviation | Std. Error | 95% Confidence Interval for Mean |             | Minimum | Maximum |
|---|---|--------|----------------|------------|----------------------------------|-------------|---------|---------|
|   |   |        |                |            | Lower Bound                      | Upper Bound |         |         |
| 1 | 3 | 1.0000 | .00000         | .00000     | 1.0000                           | 1.0000      | 1.00    | 1.00    |
| 2 | 3 | 9.8333 | .64291         | .37118     | 8.2363                           | 11.4304     | 9.10    | 10.30   |
| 3 | 3 | 1.0000 | .00000         | .00000     | 1.0000                           | 1.0000      | 1.00    | 1.00    |

### Descriptives

VAR00002

|       | N  | Mean    | Std. Deviation | Std. Error | 95% Confidence Interval for Mean |             | Minimum | Maximum |
|-------|----|---------|----------------|------------|----------------------------------|-------------|---------|---------|
|       |    |         |                |            | Lower Bound                      | Upper Bound |         |         |
| 4     | 3  | 10.8000 | .50000         | .28868     | 9.5579                           | 12.0421     | 10.30   | 11.30   |
| Total | 12 | 5.6583  | 4.89089        | 1.41188    | 2.5508                           | 8.7659      | 1.00    | 11.30   |

### Test of Homogeneity of Variances

VAR00002

| Levene Statistic | df1 | df2 | Sig. |
|------------------|-----|-----|------|
| 5.244            | 3   | 8   | .027 |

### ANOVA

VAR00002

|                | Sum of Squares | df | Mean Square | F       | Sig. |
|----------------|----------------|----|-------------|---------|------|
| Between Groups | 261.803        | 3  | 87.268      | 526.236 | .000 |
| Within Groups  | 1.327          | 8  | .166        |         |      |
| Total          | 263.129        | 11 |             |         |      |

## Post Hoc Tests

### Multiple Comparisons

Dependent Variable: VAR00002

|     | (I) | (J) | Mean Difference (I-J) | Std. Error | Sig.  | 95% Confidence Interval |             |
|-----|-----|-----|-----------------------|------------|-------|-------------------------|-------------|
|     |     |     |                       |            |       | Lower Bound             | Upper Bound |
| LSD | 1   | 2   | -8.83333 <sup>*</sup> | .33250     | .000  | -9.6001                 | -8.0666     |
|     |     | 3   | .00000                | .33250     | 1.000 | -.7667                  | .7667       |
|     |     | 4   | -9.80000 <sup>*</sup> | .33250     | .000  | -10.5667                | -9.0333     |
|     | 2   | 1   | 8.83333 <sup>*</sup>  | .33250     | .000  | 8.0666                  | 9.6001      |
|     |     | 3   | 8.83333 <sup>*</sup>  | .33250     | .000  | 8.0666                  | 9.6001      |
|     |     | 4   | -.96667 <sup>*</sup>  | .33250     | .020  | -1.7334                 | -.1999      |
|     | 3   | 1   | .00000                | .33250     | 1.000 | -.7667                  | .7667       |
|     |     | 2   | -8.83333 <sup>*</sup> | .33250     | .000  | -9.6001                 | -8.0666     |
|     |     | 4   | -9.80000 <sup>*</sup> | .33250     | .000  | -10.5667                | -9.0333     |
|     | 4   | 1   | 9.80000 <sup>*</sup>  | .33250     | .000  | 9.0333                  | 10.5667     |

\*. The mean difference is significant at the 0.05 level.

### Multiple Comparisons

Dependent Variable: VAR00002

|     | (I)<br>VAR0<br>0001 | (J)<br>VAR0<br>0001 | Mean<br>Difference (I-<br>J) | Std. Error | Sig. | 95% Confidence Interval |             |
|-----|---------------------|---------------------|------------------------------|------------|------|-------------------------|-------------|
|     |                     |                     |                              |            |      | Lower Bound             | Upper Bound |
| LSD | 4                   | 2                   | .96667 <sup>*</sup>          | .33250     | .020 | .1999                   | 1.7334      |
|     |                     | 3                   | 9.80000 <sup>*</sup>         | .33250     | .000 | 9.0333                  | 10.5667     |

\*. The mean difference is significant at the 0.05 level.

### Homogeneous Subsets

VAR00002

|                     | VAR0<br>0001 | N | Subset for alpha = 0.05 |        |         |
|---------------------|--------------|---|-------------------------|--------|---------|
|                     |              |   | 1                       | 2      | 3       |
| Duncan <sup>a</sup> | 1            | 3 | 1.0000                  |        |         |
|                     | 3            | 3 | 1.0000                  |        |         |
|                     | 2            | 3 |                         | 9.8333 |         |
|                     | 4            | 3 |                         |        | 10.8000 |
|                     | Sig.         |   | 1.000                   | 1.000  | 1.000   |

Means for groups in homogeneous subsets are displayed.

a. Uses Harmonic Mean Sample Size = 3.000.
