# Supplementary material for: Comparative Transcriptome Analysis of Onion in Response to Infection by Alternaria porri (Ellis) Cifferi
Source: Frontiers journal article supplement (doi:10.3389/fpls.2022.857306), 2022-04-11
Supplement: Data_Sheet_4.ZIP [file Data_Sheet_4.ZIP]

```

ONEWAY VAR00002 BY VAR00001
  /STATISTICS DESCRIPTIVES HOMOGENEITY
  /MISSING ANALYSIS
  /POSTHOC=DUNCAN LSD ALPHA(0.05).

```

## Oneway

### Notes

|                        |                                                                                                                                  |                                                                                                        |
|------------------------|----------------------------------------------------------------------------------------------------------------------------------|--------------------------------------------------------------------------------------------------------|
| Output Created         | 24-Feb-2022 11:56:39                                                                                                             |                                                                                                        |
| Comments               |                                                                                                                                  |                                                                                                        |
| Input                  | Active Dataset                                                                                                                   | DataSet0                                                                                               |
|                        | Filter                                                                                                                           | <none>                                                                                                 |
|                        | Weight                                                                                                                           | <none>                                                                                                 |
|                        | Split File                                                                                                                       | <none>                                                                                                 |
|                        | N of Rows in Working Data File                                                                                                   | 12                                                                                                     |
| Missing Value Handling | Definition of Missing                                                                                                            | User-defined missing values are treated as missing.                                                    |
|                        | Cases Used                                                                                                                       | Statistics for each analysis are based on cases with no missing data for any variable in the analysis. |
| Syntax                 | ONEWAY VAR00002 BY VAR00001<br>/STATISTICS DESCRIPTIVES<br>HOMOGENEITY<br>/MISSING ANALYSIS<br>/POSTHOC=DUNCAN LSD ALPHA (0.05). |                                                                                                        |
| Resources              | Processor Time                                                                                                                   | 00:00:00.031                                                                                           |
|                        | Elapsed Time                                                                                                                     | 00:00:00.047                                                                                           |

[DataSet0]

### Descriptives

VAR00002

|   | N | Mean   | Std. Deviation | Std. Error | 95% Confidence Interval for Mean |             | Minimum | Maximum |
|---|---|--------|----------------|------------|----------------------------------|-------------|---------|---------|
|   |   |        |                |            | Lower Bound                      | Upper Bound |         |         |
| 1 | 3 | 1.0000 | .00000         | .00000     | 1.0000                           | 1.0000      | 1.00    | 1.00    |
| 2 | 3 | 6.5333 | .41633         | .24037     | 5.4991                           | 7.5676      | 6.20    | 7.00    |
| 3 | 3 | 1.0000 | .00000         | .00000     | 1.0000                           | 1.0000      | 1.00    | 1.00    |

## Descriptives

VAR00002

|       | N  | Mean   | Std. Deviation | Std. Error | 95% Confidence Interval for Mean |             | Minimum | Maximum |
|-------|----|--------|----------------|------------|----------------------------------|-------------|---------|---------|
|       |    |        |                |            | Lower Bound                      | Upper Bound |         |         |
| 4     | 3  | 5.6667 | .55076         | .31798     | 4.2985                           | 7.0348      | 5.10    | 6.20    |
| Total | 12 | 3.5500 | 2.69865        | .77903     | 1.8354                           | 5.2646      | 1.00    | 7.00    |

## Test of Homogeneity of Variances

VAR00002

| Levene Statistic | df1 | df2 | Sig. |
|------------------|-----|-----|------|
| 4.118            | 3   | 8   | .049 |

## ANOVA

VAR00002

|                | Sum of Squares | df | Mean Square | F       | Sig. |
|----------------|----------------|----|-------------|---------|------|
| Between Groups | 79.157         | 3  | 26.386      | 221.417 | .000 |
| Within Groups  | .953           | 8  | .119        |         |      |
| Total          | 80.110         | 11 |             |         |      |

## Post Hoc Tests

### Multiple Comparisons

Dependent Variable: VAR00002

|     | (I) VAR00001 | (J) VAR00001 | Mean Difference (I-J) | Std. Error | Sig.  | 95% Confidence Interval |             |
|-----|--------------|--------------|-----------------------|------------|-------|-------------------------|-------------|
|     |              |              |                       |            |       | Lower Bound             | Upper Bound |
| LSD | 1            | 2            | -5.53333*             | .28186     | .000  | -6.1833                 | -4.8834     |
|     |              | 3            | .00000                | .28186     | 1.000 | -.6500                  | .6500       |
|     |              | 4            | -4.66667*             | .28186     | .000  | -5.3166                 | -4.0167     |
|     | 2            | 1            | 5.53333*              | .28186     | .000  | 4.8834                  | 6.1833      |
|     |              | 3            | 5.53333*              | .28186     | .000  | 4.8834                  | 6.1833      |
|     |              | 4            | .86667*               | .28186     | .015  | .2167                   | 1.5166      |
|     | 3            | 1            | .00000                | .28186     | 1.000 | -.6500                  | .6500       |
|     |              | 2            | -5.53333*             | .28186     | .000  | -6.1833                 | -4.8834     |
|     |              | 4            | -4.66667*             | .28186     | .000  | -5.3166                 | -4.0167     |
|     | 4            | 1            | 4.66667*              | .28186     | .000  | 4.0167                  | 5.3166      |

\*. The mean difference is significant at the 0.05 level.

### Multiple Comparisons

Dependent Variable: VAR00002

|     | (I)<br>VAR0<br>0001 | (J)<br>VAR0<br>0001 | Mean<br>Difference (I-<br>J) | Std. Error | Sig. | 95% Confidence Interval |             |
|-----|---------------------|---------------------|------------------------------|------------|------|-------------------------|-------------|
|     |                     |                     |                              |            |      | Lower Bound             | Upper Bound |
| LSD | 4                   | 2                   | -.86667 <sup>*</sup>         | .28186     | .015 | -1.5166                 | -.2167      |
|     |                     | 3                   | 4.66667 <sup>*</sup>         | .28186     | .000 | 4.0167                  | 5.3166      |

\*. The mean difference is significant at the 0.05 level.

### Homogeneous Subsets

VAR00002

|                     | VAR0<br>0001 | N | Subset for alpha = 0.05 |        |        |
|---------------------|--------------|---|-------------------------|--------|--------|
|                     |              |   | 1                       | 2      | 3      |
| Duncan <sup>a</sup> | 1            | 3 | 1.0000                  |        |        |
|                     | 3            | 3 | 1.0000                  |        |        |
|                     | 4            | 3 |                         | 5.6667 |        |
|                     | 2            | 3 |                         |        | 6.5333 |
|                     | Sig.         |   | 1.000                   | 1.000  | 1.000  |

Means for groups in homogeneous subsets are displayed.

a. Uses Harmonic Mean Sample Size = 3.000.
