# Supplementary material for: Comparative Transcriptome Analysis of Onion in Response to Infection by Alternaria porri (Ellis) Cifferi
Source: Front Plant Sci. 2022 Apr 11;13:857306. doi: 10.3389/fpls.2022.857306 (PMC9036366; doi:10.3389/fpls.2022.857306)
Supplement: Supplementary file 1 [file Data_Sheet_1.XLSX]

## Sheet: Summary
Akc and Afrc are used as the reference for differential expression analysis for Ak and Afr samples respectively.
Cutoff of Diffrenatial Analysis
Parameter	Value
pValue	0.05
log2FoldChange for Up regulated Transcripts	2
log2FoldChange for Down regulated Transcripts	-2
Statistics for Diffrenatial expressed Transcripts
Parameter	Ak	Afr
Up Regulated Transcripts	832	8064
Down Regulated Transcripts	564	248
Total DEG	1396	8312

## Sheet: Ak_downregulated
TranscriptID	baseMean	log2FoldChange	lfcSE	stat	pvalue	padj	nrdb	Protein names	Gene names	Organism	Gene ontology (molecular function)	Gene ontology (cellular component)	Gene ontology (biological process)	Pathway	COG Functional cat.	TFDB_ID	TFDB_Family
TRINITY_DN100_c0_g1_i6	16346.4	-3.91529	0.385782	-4.96468	6.88133e-07	5.97465e-05	XP_008781507.1	--	--	--	--	--	--	--	G	FANhyb_rscf00000068.1.g00012.1	FAR1
TRINITY_DN10096_c0_g1_i1	10408.3	-3.35031	0.428587	-3.15062	0.00162927	0.0393665	QBZ68897.1	Chitinase (EC 3.2.1.14)	--	Lilium longiflorum (Trumpet lily)	chitinase activity [GO:0004568]	--	cell wall macromolecule catabolic process [GO:0016998]; chitin catabolic process [GO:0006032]; polysaccharide catabolic process [GO:0000272]	--	--	--	--
TRINITY_DN1010_c0_g1_i2	354.065	-5.19454	0.618163	-5.16779	2.36879e-07	2.31775e-05	--	--	--	--	--	--	--	--	--	--	--
TRINITY_DN101199_c0_g1_i3	324.085	-4.68821	0.69553	-3.86498	0.000111098	0.00445013	--	--	--	--	--	--	--	--	--	--	--
TRINITY_DN1016_c0_g2_i1	597.824	-4.54338	0.655272	-3.88142	0.000103848	0.00422939	XP_020255179.1	--	--	--	--	--	--	--	C	--	--
TRINITY_DN10275_c0_g1_i8	1502.1	-5.74392	0.55713	-6.72002	1.81706e-11	4.41741e-09	XP_020272244.1	--	--	--	--	--	--	--	--	--	--
TRINITY_DN10282_c0_g1_i1	127.09	-4.03505	0.529249	-3.84515	0.000120477	0.00473575	--	--	--	--	--	--	--	--	--	--	--
TRINITY_DN10428_c0_g1_i8	464.913	-4.00882	0.557681	-3.6021	0.000315651	0.0102732	--	--	--	--	--	--	--	--	--	--	--
TRINITY_DN1044_c0_g2_i3	4240.43	-4.88313	0.824684	-3.49604	0.000472223	0.014227	--	--	--	--	--	--	--	--	--	676777512	ERF
TRINITY_DN10463_c0_g1_i46	17384.2	-4.42402	0.383923	-6.3138	2.72259e-10	5.3114e-08	XP_020244167.1	--	--	--	--	--	--	--	--	--	--
TRINITY_DN106027_c0_g1_i3	2518.75	-5.73727	0.462423	-8.08191	6.37586481486671E--016	3.14848e-13	--	--	--	--	--	--	--	--	--	--	--
TRINITY_DN106445_c0_g2_i5	34.4997	-8.78113	1.7579	-3.85751	0.000114548	0.00455942	--	--	--	--	--	--	--	--	--	--	--
TRINITY_DN10649_c0_g1_i2	5127.27	-3.4213	0.287068	-4.95109	7.37998e-07	6.32078e-05	XP_020255162.1	--	--	--	--	--	--	--	--	--	--
TRINITY_DN10660_c1_g1_i1	261.237	-9.34767	1.34503	-5.46284	4.6858e-08	5.40474e-06	XP_020271538.1	--	--	--	--	--	--	--	--	--	--
TRINITY_DN10758_c0_g1_i2	67.3721	-9.74558	1.64779	-4.70059	2.59416e-06	0.000188908	--	--	--	--	--	--	--	--	--	--	--
TRINITY_DN10897_c0_g1_i7	1481.04	-6.11785	0.523943	-7.85935	3.86127969748084E--015	1.69489e-12	EFH69824.1	Auxin--responsive family protein	ARALYDRAFT_473154	Arabidopsis lyrata subsp. lyrata (Lyre--leaved rock--cress)	--	--	response to auxin [GO:0009733]	--	--	--	--
TRINITY_DN109677_c0_g2_i1	22707	-4.38972	0.560732	-4.26178	2.02804e-05	0.00104558	XP_018433033.1	Glyceraldehyde--3--phosphate dehydrogenase (EC 1.2.1.--)	LOC108805608	Raphanus sativus (Radish) (Raphanus raphanistrum var. sativus)	NAD binding [GO:0051287]; NADP binding [GO:0050661]; oxidoreductase activity, acting on the aldehyde or oxo group of donors, NAD or NADP as acceptor [GO:0016620]	--	glucose metabolic process [GO:0006006]	--	--	--	--
TRINITY_DN1105_c0_g1_i13	2362.85	-5.61762	0.460746	-7.85166	4.10581484288198E--015	1.77754e-12	XP_008794165.1	--	--	--	--	--	--	--	--	--	--
TRINITY_DN110833_c0_g1_i1	82.8437	-4.58107	0.786109	-3.28335	0.00102583	0.0269048	--	--	--	--	--	--	--	--	--	--	--
TRINITY_DN11100_c0_g1_i1	32.0245	-8.67317	1.78622	-3.73592	0.000187029	0.00677076	--	--	--	--	--	--	--	--	--	--	--
TRINITY_DN111852_c1_g1_i3	111.674	-10.4745	1.74396	-4.85936	1.17768e-06	9.59267e-05	--	--	--	--	--	--	--	--	--	--	--
TRINITY_DN11263_c0_g1_i5	317.381	-4.42143	0.457156	-5.29672	1.17904e-07	1.26313e-05	AWD38959.1	--	--	--	--	--	--	--	--	--	--
TRINITY_DN11383_c0_g1_i3	15890	-9.11213	0.662422	-10.7365	6.85608001289705E--027	1.44453035151732E--023	VVA33446.1	Chlorophyll a--b binding protein, chloroplastic	ALMOND_2B033007	Prunus dulcis (Almond) (Amygdalus dulcis)	chlorophyll binding [GO:0016168]; metal ion binding [GO:0046872]	chloroplast thylakoid membrane [GO:0009535]; photosystem I [GO:0009522]; photosystem II [GO:0009523]	photosynthesis, light harvesting [GO:0009765]; protein--chromophore linkage [GO:0018298]	--	--	Bradi3g42627.5.p	ERF
TRINITY_DN11654_c0_g1_i11	238.135	-4.45535	0.487612	-5.03545	4.76726e-07	4.30678e-05	--	--	--	--	--	--	--	--	--	--	--
TRINITY_DN116797_c0_g1_i1	531.322	-5.84148	0.400284	-9.5969	8.2386015335844E--022	8.97837113335867E--019	XP_010242833.1	auxin--responsive protein SAUR64--like	LOC104587078	Nelumbo nucifera (Sacred lotus)	--	--	response to auxin [GO:0009733]	--	--	--	--
TRINITY_DN11705_c0_g1_i6	47.5953	-6.71708	1.33957	-3.52134	0.000429372	0.013226	--	--	--	--	--	--	--	--	--	--	--
TRINITY_DN11799_c0_g1_i1	2793.93	-4.40452	0.521481	-4.61094	4.00844e-06	0.000274205	XP_020275786.1	--	--	--	--	--	--	--	--	--	--
TRINITY_DN11849_c0_g2_i1	120.347	-4.53825	0.739386	-3.43291	0.00059713	0.0172976	ONK77662.1	PH domain--containing protein (Fragment)	A4U43_C02F9150	Asparagus officinalis (Garden asparagus)	lipid binding [GO:0008289]	--	lipid transport [GO:0006869]	--	--	--	--
TRINITY_DN118846_c1_g1_i1	10903.1	-3.95852	0.552297	-3.54614	0.000390916	0.0122201	ABA46912.1	Ribulose bisphosphate carboxylase small subunit (RuBisCO small subunit) (Fragment)	rbcS--Ma5	Musa AAB Group	monooxygenase activity [GO:0004497]; ribulose--bisphosphate carboxylase activity [GO:0016984]	chloroplast [GO:0009507]	photorespiration [GO:0009853]; reductive pentose--phosphate cycle [GO:0019253]	--	E	mrna16933.1--v1.0--hybrid	M--type_MADS
TRINITY_DN11950_c0_g1_i4	655.83	-4.56232	0.725899	-3.52986	0.000415779	0.01287	XP_020260416.1	--	--	--	--	--	--	--	--	--	--
TRINITY_DN120462_c0_g1_i2	21603.9	-4.29578	0.50508	-4.54537	5.48389e-06	0.000360318	WP_152927934.1	--	--	--	--	--	--	--	M	Bradi3g42627.5.p	ERF
TRINITY_DN121158_c0_g1_i1	58.6797	-9.54609	2.18514	-3.45336	0.000553645	0.0162464	XP_026286004.1	--	--	--	--	--	--	--	--	--	--
TRINITY_DN12242_c1_g1_i1	38.3093	-8.92977	1.86827	-3.70919	0.000207926	0.00740012	XP_020273524.1	--	--	--	--	--	--	--	--	--	--
TRINITY_DN12248_c0_g1_i3	2326	-5.24392	0.859168	-3.77565	0.000159591	0.00601874	--	--	--	--	--	--	--	--	--	--	--
TRINITY_DN124343_c0_g1_i1	102511	-4.12481	0.466383	-4.55593	5.21537e-06	0.000346274	XP_020255448.1	--	--	--	--	--	--	--	--	--	--
TRINITY_DN1245_c1_g2_i1	101.81	-8.92352	1.51138	-4.58093	4.62912e-06	0.000312604	--	--	--	--	--	--	--	--	--	--	--
TRINITY_DN12588_c0_g1_i1	235.527	-3.9537	0.58084	-3.36358	0.000769386	0.0212179	XP_019701742.1	glutaredoxin--C1--like	LOC109504887	Elaeis guineensis var. tenera (Oil palm)	protein disulfide oxidoreductase activity [GO:0015035]	cytoplasm [GO:0005737]	--	--	--	--	--
TRINITY_DN126199_c0_g1_i1	13508.8	-5.46879	0.577042	-6.01134	1.83999e-09	2.94985e-07	--	--	--	--	--	--	--	--	--	--	--
TRINITY_DN12691_c0_g1_i1	986.68	-7.50596	0.661112	-8.32833	8.19888303430608E--017	4.71123e-14	XP_020249759.1	--	--	--	--	--	--	--	--	--	--
TRINITY_DN12692_c0_g1_i1	254.147	-7.66811	0.736257	-7.69855	1.37619e-14	5.50545e-12	XP_004230996.1	--	--	--	--	--	--	--	--	GRMZM5G899865_P01	bHLH
TRINITY_DN1271_c0_g1_i1	1524.97	-6.25598	0.798822	-5.32782	9.9398e-08	1.07581e-05	XP_008804449.1	--	--	--	--	--	--	--	--	GSMUA_Achr7P08840_001	HD--ZIP
TRINITY_DN127357_c0_g1_i1	3646.6	-3.96061	0.541531	-3.62049	0.000294048	0.00970053	XP_003573910.1	Ribulose bisphosphate carboxylase small subunit (RuBisCO small subunit)	100845819 BRADI_3g26391v3	Brachypodium distachyon (Purple false brome) (Trachynia distachya)	monooxygenase activity [GO:0004497]; ribulose--bisphosphate carboxylase activity [GO:0016984]	chloroplast [GO:0009507]	photorespiration [GO:0009853]; reductive pentose--phosphate cycle [GO:0019253]	--	--	--	--
TRINITY_DN1275_c0_g1_i5	299.949	-3.36152	0.366657	-3.71334	0.000204538	0.00728773	--	--	--	--	--	--	--	--	--	--	--
TRINITY_DN1275_c0_g2_i1	1434.35	-3.72662	0.357111	-4.83497	1.33167e-06	0.000106818	XP_010928441.1	polygalacturonase inhibitor	LOC105050208	Elaeis guineensis var. tenera (Oil palm)	--	--	--	--	--	--	--
TRINITY_DN128114_c0_g1_i2	23032.4	-3.28577	0.255087	-5.04053	4.64252e-07	4.21615e-05	XP_020259937.1	--	--	--	--	--	--	--	--	--	--
TRINITY_DN12830_c0_g1_i10	21530.5	-2.87976	0.285483	-3.08167	0.00205842	0.0471751	XP_020274983.1	--	--	--	--	--	--	--	--	--	--
TRINITY_DN129268_c1_g1_i3	45938.3	-7.26327	0.784559	-6.70856	1.9655e-11	4.70589e-09	XP_008786990.1	--	--	--	--	--	--	--	--	C.cajan_40518	Trihelix
TRINITY_DN12981_c1_g1_i5	49.6854	-9.31054	1.74693	-4.18479	2.85431e-05	0.00140074	--	--	--	--	--	--	--	--	--	--	--
TRINITY_DN129993_c4_g1_i1	518.419	-5.594	1.11922	-3.21116	0.00132202	0.0333981	XP_020091442.1	caffeoylshikimate esterase--like	LOC109712336	Ananas comosus (Pineapple) (Ananas ananas)	--	--	--	--	--	--	--
TRINITY_DN13012_c3_g1_i1	590.511	-3.69388	0.320063	-5.29234	1.20763e-07	1.28361e-05	--	--	--	--	--	--	--	--	--	--	--
TRINITY_DN13015_c0_g1_i1	552.145	-5.78754	0.524008	-7.22802	4.90099e-13	1.51854e-10	PON65068.1	Basic helix--loop--helix transcription factor	PanBHLH32 PanWU01x14_119850	Parasponia andersonii (Sponia andersonii)	protein dimerization activity [GO:0046983]	nucleus [GO:0005634]	--	--	K	mrna09115.1--v1.0--hybrid	bHLH
TRINITY_DN13058_c0_g1_i2	20.6915	-8.0432	1.94168	-3.11235	0.00185604	0.0433863	--	--	--	--	--	--	--	--	--	--	--
TRINITY_DN13144_c0_g1_i1	756.105	-6.12331	0.724185	-5.69373	1.24294e-08	1.67157e-06	--	--	--	--	--	--	--	--	--	--	--
TRINITY_DN13192_c0_g1_i2	842.054	-4.46358	0.482843	-5.10223	3.35674e-07	3.16676e-05	XP_008790157.1	--	--	--	--	--	--	--	--	KZV57651.1	MYB_related
TRINITY_DN13202_c0_g2_i3	32.2175	-7.20889	1.67437	-3.11095	0.00186487	0.0434963	--	--	--	--	--	--	--	--	--	--	--
TRINITY_DN13217_c0_g1_i1	95.7663	-5.32383	0.889511	-3.73669	0.000186457	0.00676552	--	--	--	--	--	--	--	--	--	--	--
TRINITY_DN1330_c1_g1_i3	1274.44	-4.64947	0.630944	-4.19922	2.67836e-05	0.00132675	XP_020266650.1	--	--	--	--	--	--	--	--	--	--
TRINITY_DN13310_c0_g1_i4	241.176	-4.23955	0.725376	-3.08743	0.00201894	0.0465061	XP_010913778.1	phospholipase A1 PLIP1, chloroplastic	LOC105039341	Elaeis guineensis var. tenera (Oil palm)	phospholipase A1 activity [GO:0008970]	--	lipid metabolic process [GO:0006629]	--	--	--	--
TRINITY_DN13328_c2_g1_i3	3642.1	-3.51674	0.476411	-3.18367	0.00145419	0.035933	--	--	--	--	--	--	--	--	--	--	--
TRINITY_DN13368_c0_g1_i1	1015.12	-8.48493	0.912463	-7.10706	1.18545e-12	3.4059e-10	XP_020263041.1	--	--	--	--	--	--	--	E	--	--
TRINITY_DN13395_c0_g3_i1	33.8603	-8.75587	1.76878	-3.81951	0.000133715	0.00517248	--	--	--	--	--	--	--	--	--	--	--
TRINITY_DN1340_c1_g1_i1	137.203	-10.7719	1.81271	-4.83913	1.30411e-06	0.000104873	--	--	--	--	--	--	--	--	--	--	--
TRINITY_DN13441_c0_g1_i1	34.7361	-8.79105	1.75547	-3.86852	0.0001095	0.00441409	--	--	--	--	--	--	--	--	--	--	--
TRINITY_DN13518_c0_g4_i1	51.2685	-6.98535	1.30798	-3.81149	0.000138133	0.00531091	--	--	--	--	--	--	--	--	--	--	--
TRINITY_DN13547_c0_g4_i1	68.1977	-4.97441	0.960276	-3.09745	0.00195193	0.0451933	--	--	--	--	--	--	--	--	--	--	--
TRINITY_DN13566_c1_g1_i1	98.3431	-6.63558	0.981623	-4.72237	2.33117e-06	0.000171735	XP_020275130.1	--	--	--	--	--	--	--	--	--	--
TRINITY_DN1371_c1_g2_i1	100.642	-4.38025	0.697513	-3.41249	0.000643731	0.018403	--	--	--	--	--	--	--	--	--	--	--
TRINITY_DN13748_c0_g2_i1	22.9164	-8.1907	1.89747	-3.26261	0.00110393	0.0287386	--	--	--	--	--	--	--	--	--	--	--
TRINITY_DN13848_c1_g1_i1	138.054	-5.73276	0.661305	-5.64453	1.6563e-08	2.17201e-06	ONK63001.1	Glucose--1--phosphate adenylyltransferase (EC 2.7.7.27) (ADP--glucose pyrophosphorylase)	A4U43_C07F10360	Asparagus officinalis (Garden asparagus)	ATP binding [GO:0005524]; glucose--1--phosphate adenylyltransferase activity [GO:0008878]	chloroplast [GO:0009507]; extracellular region [GO:0005576]	glycogen biosynthetic process [GO:0005978]; rejection of self pollen [GO:0060320]; starch biosynthetic process [GO:0019252]	PATHWAY: Glycan biosynthesis; starch biosynthesis. {ECO:0000256|ARBA:ARBA00004727, ECO:0000256|RuleBase:RU362093}.	M	--	--
TRINITY_DN13852_c0_g3_i1	48.2247	-9.26515	1.67531	-4.33661	1.44697e-05	0.000793261	--	--	--	--	--	--	--	--	--	--	--
TRINITY_DN13957_c0_g1_i1	65.2567	-9.69982	2.3392	-3.29165	0.000996024	0.0263417	YP_009517124.1	--	--	--	--	--	--	--	--	--	--
TRINITY_DN13961_c0_g1_i1	143.726	-10.8388	1.65573	-5.33829	9.38279e-08	1.01902e-05	--	--	--	--	--	--	--	--	--	--	--
TRINITY_DN14000_c0_g2_i1	8639.04	-8.78173	0.84133	-8.06073	7.58398601181823E--016	3.68745e-13	XP_020277356.1	--	--	--	--	--	--	--	--	FANhyb_rscf00002064.1.g00002.1	B3
TRINITY_DN14047_c1_g1_i1	67.247	-9.74283	1.65142	-4.68859	2.75093e-06	0.000197144	--	--	--	--	--	--	--	--	--	--	--
TRINITY_DN14050_c0_g1_i4	561.656	-3.19274	0.333258	-3.57901	0.000344895	0.011066	XP_020106805.1	Auxin influx carrier protein (Auxin transport carrier) (auxin transporter--like protein 3)	AUX2 LOC109723015	Ananas comosus (Pineapple) (Ananas ananas)	--	integral component of membrane [GO:0016021]	amino acid transport [GO:0006865]	--	E	--	--
TRINITY_DN14171_c0_g1_i1	534.347	-6.01272	0.438641	-9.14807	5.7959546270928E--020	5.23358142956117E--017	XP_020260743.1	--	--	--	--	--	--	--	--	--	--
TRINITY_DN14243_c0_g1_i3	33.7482	-8.74667	1.9366	-3.48376	0.000494417	0.0147829	--	--	--	--	--	--	--	--	--	--	--
TRINITY_DN1435_c0_g1_i3	52634.3	-3.8668	0.385661	-4.84053	1.29496e-06	0.000104403	XP_020089306.1	Photosystem II 22 kDa protein, chloroplastic	LOC109710908 ACMD2_20187	Ananas comosus (Pineapple) (Ananas ananas)	mRNA binding [GO:0003729]; protein domain specific binding [GO:0019904]	chloroplast thylakoid membrane [GO:0009535]	nonphotochemical quenching [GO:0010196]; response to karrikin [GO:0080167]; thylakoid membrane organization [GO:0010027]	--	--	--	--
TRINITY_DN14353_c0_g2_i1	85.1936	-6.08498	0.880622	-4.63874	3.50544e-06	0.000245102	--	--	--	--	--	--	--	--	--	--	--
TRINITY_DN14444_c0_g1_i1	153.153	-6.21763	1.0687	-3.94652	7.92941e-05	0.00339108	--	--	--	--	--	--	--	--	--	--	--
TRINITY_DN144470_c0_g1_i1	78.7516	-5.58212	1.01971	-3.5129	0.000443253	0.0135218	AAT68476.1	Flavonol synthase	--	Allium cepa (Onion)	metal ion binding [GO:0046872]; oxidoreductase activity [GO:0016491]	--	--	--	--	--	--
TRINITY_DN14473_c0_g1_i2	130.958	-5.63473	0.999341	-3.63713	0.000275697	0.00924961	XP_020676897.1	--	--	--	--	--	--	--	--	Gh_D11G0701	NAC
TRINITY_DN144788_c0_g2_i1	23507.8	-3.44889	0.408537	-3.54653	0.000390339	0.0122143	XP_020248634.1	--	--	--	--	--	--	--	--	--	--
TRINITY_DN1451_c5_g1_i1	19792.5	-4.33523	0.503188	-4.64086	3.46965e-06	0.000243137	KVI00868.1	Chlorophyll a--b binding protein, chloroplastic	Ccrd_020878	Cynara cardunculus var. scolymus (Globe artichoke) (Cynara scolymus)	chlorophyll binding [GO:0016168]	chloroplast thylakoid membrane [GO:0009535]; photosystem I [GO:0009522]; photosystem II [GO:0009523]	photosynthesis, light harvesting [GO:0009765]; protein--chromophore linkage [GO:0018298]	--	M	Bradi3g42627.5.p	ERF
TRINITY_DN14546_c0_g1_i20	99.8009	-10.315	1.57471	-5.28037	1.28923e-07	1.34471e-05	--	--	--	--	--	--	--	--	--	--	--
TRINITY_DN14557_c0_g1_i1	231.473	-4.22959	0.633708	-3.51833	0.000434278	0.0133122	XP_029120654.1	--	--	--	--	--	--	--	S	--	--
TRINITY_DN14575_c0_g1_i1	104.866	-5.81626	1.24312	-3.06991	0.00214124	0.0487549	--	--	--	--	--	--	--	--	--	Gorai.001G003200.1	S1Fa--like
TRINITY_DN14598_c0_g1_i2	44.1779	-9.13731	1.70415	-4.1882	2.81177e-05	0.00138632	--	--	--	--	--	--	--	--	--	--	--
TRINITY_DN14598_c0_g2_i2	48.5281	-6.93356	1.51507	-3.25633	0.00112862	0.0291889	XP_020266884.1	--	--	--	--	--	--	--	L	Sopen12g015990.1	TCP
TRINITY_DN14614_c0_g2_i3	105.054	-5.82662	0.772009	-4.95671	7.16984e-07	6.17426e-05	XP_020275029.1	--	--	--	--	--	--	--	--	--	--
TRINITY_DN14614_c0_g3_i1	173.561	-6.32846	0.784079	-5.52044	3.38152e-08	4.079e-06	XP_020275029.1	--	--	--	--	--	--	--	--	--	--
TRINITY_DN14637_c0_g1_i6	246.863	-8.24477	0.868057	-7.19396	6.29367e-13	1.89433e-10	XP_020249971.1	--	--	--	--	--	--	--	--	--	--
TRINITY_DN14644_c0_g2_i1	142.527	-23.2646	4.78518	-4.44385	8.83636e-06	0.000529913	XP_026284422.1	--	--	--	--	--	--	--	--	--	--
TRINITY_DN14666_c0_g1_i1	468.069	-7.88304	1.0091	-5.82996	5.54405e-09	8.14949e-07	XP_010935686.1	Pectate lyase (EC 4.2.2.2)	LOC105055552	Elaeis guineensis var. tenera (Oil palm)	metal ion binding [GO:0046872]; pectate lyase activity [GO:0030570]	--	pectin catabolic process [GO:0045490]	PATHWAY: Glycan metabolism. {ECO:0000256|ARBA:ARBA00004881}.; PATHWAY: Glycan metabolism; pectin degradation; 2--dehydro--3--deoxy--D--gluconate from pectin: step 2/5. {ECO:0000256|ARBA:ARBA00005220, ECO:0000256|RuleBase:RU361123}.	--	GSMUA_Achr7P08840_001	HD--ZIP
TRINITY_DN14927_c0_g1_i2	14091.3	-3.93541	0.563366	-3.43543	0.00059161	0.0172008	--	--	--	--	--	--	--	--	--	--	--
TRINITY_DN14990_c0_g1_i5	405.405	-9.02419	1.16507	-6.02899	1.64991e-09	2.73004e-07	XP_020248091.1	--	--	--	--	--	--	--	--	--	--
TRINITY_DN150014_c1_g1_i3	37.2369	-7.41333	1.69886	-3.18644	0.00144033	0.0356742	XP_009390221.1	--	--	--	--	--	--	--	E	--	--
TRINITY_DN1503_c2_g1_i2	262.339	-3.71112	0.400082	-4.27693	1.89489e-05	0.000993139	--	--	--	--	--	--	--	--	--	--	--
TRINITY_DN15043_c0_g1_i6	1075.29	-3.64058	0.406705	-4.03383	5.48758e-05	0.00248466	ONK71657.1	Uncharacterized protein	A4U43_C04F10990	Asparagus officinalis (Garden asparagus)	--	--	--	--	S	--	--
TRINITY_DN15115_c0_g1_i3	11027.6	-3.12414	0.360369	-3.11942	0.00181206	0.0425155	XP_020273698.1	--	--	--	--	--	--	--	--	Zmw_sc00055.1.g00420.1	NF--YA
TRINITY_DN1526_c0_g1_i3	771.203	-4.10806	0.422583	-4.98852	6.08431e-07	5.38623e-05	--	--	--	--	--	--	--	--	--	--	--
TRINITY_DN15296_c0_g3_i3	129.287	-4.27347	0.726734	-3.12833	0.00175802	0.0416885	XP_031107686.1	--	--	--	--	--	--	--	--	--	--
TRINITY_DN15296_c0_g4_i1	123.578	-4.94601	0.68341	-4.31075	1.62701e-05	0.000880478	--	--	--	--	--	--	--	--	--	--	--
TRINITY_DN15424_c1_g1_i1	78.6098	-5.02326	0.942666	-3.20714	0.00134061	0.033733	--	--	--	--	--	--	--	--	--	--	--
TRINITY_DN155202_c0_g1_i2	4472.93	-3.81303	0.546417	-3.31803	0.000906564	0.0243218	PHU27209.1	Ribulose bisphosphate carboxylase small subunit (RuBisCO small subunit)	BC332_05541	Capsicum chinense (Scotch bonnet) (Bonnet pepper)	monooxygenase activity [GO:0004497]; ribulose--bisphosphate carboxylase activity [GO:0016984]	chloroplast [GO:0009507]	carbon fixation [GO:0015977]; photorespiration [GO:0009853]; photosynthesis [GO:0015979]	--	--	mrna16933.1--v1.0--hybrid	M--type_MADS
TRINITY_DN155844_c0_g1_i1	5644.23	-4.01973	0.462954	-4.36269	1.28474e-05	0.00072247	--	--	--	--	--	--	--	--	--	--	--
TRINITY_DN156524_c0_g1_i3	55.8306	-9.47462	1.67003	-4.47574	7.61483e-06	0.000473738	RWW58605.1	--	--	--	--	--	--	--	C	Achn350331	ERF
TRINITY_DN15674_c0_g2_i4	37.795	-8.91087	1.79056	-3.85961	0.00011357	0.00453761	--	--	--	--	--	--	--	--	--	--	--
TRINITY_DN15695_c1_g1_i2	63.0689	-6.03389	1.2391	-3.2555	0.00113194	0.0292374	XP_020275042.1	--	--	--	--	--	--	--	S	KN538722.1_FGP037	HB--PHD
TRINITY_DN1572_c1_g1_i2	136.535	-6.77568	0.944238	-5.0577	4.24338e-07	3.89848e-05	--	--	--	--	--	--	--	--	--	--	--
TRINITY_DN15774_c0_g1_i1	76.5601	-7.42769	1.2627	-4.29849	1.71965e-05	0.000921151	--	--	--	--	--	--	--	--	--	--	--
TRINITY_DN15797_c0_g2_i1	42.1332	-9.06708	1.87059	-3.77799	0.000158099	0.00597673	--	--	--	--	--	--	--	--	--	--	--
TRINITY_DN157981_c0_g1_i1	48634.2	-3.74968	0.232975	-7.51016	5.90555e-14	2.19575e-11	XP_021682957.1	--	--	--	--	--	--	--	--	--	--
TRINITY_DN1588_c0_g5_i2	146877	-3.88764	0.498137	-3.7894	0.000151011	0.00573625	--	--	--	--	--	--	--	--	--	--	--
TRINITY_DN16050_c0_g1_i16	61.9353	-9.6247	1.64256	-4.64196	3.45115e-06	0.000242378	--	--	--	--	--	--	--	--	--	--	--
TRINITY_DN16179_c0_g1_i1	60.485	-6.29463	1.37305	-3.1278	0.00176118	0.0417243	ONM14732.1	Putative LRR receptor--like serine/threonine--protein kinase	ZEAMMB73_Zm00001d002599	Zea mays (Maize)	ATP binding [GO:0005524]; protein kinase activity [GO:0004672]	integral component of membrane [GO:0016021]	--	--	--	Sme2.5_01196.1_g00006.1	STAT
TRINITY_DN16184_c0_g1_i4	60.3463	-7.07166	1.29952	-3.90273	9.51148e-05	0.00395008	--	--	--	--	--	--	--	--	--	--	--
TRINITY_DN16200_c2_g1_i1	56.8879	-9.50352	1.64429	-4.56339	5.03338e-06	0.000336311	--	--	--	--	--	--	--	--	--	--	--
TRINITY_DN16202_c0_g2_i4	27.9777	-8.47647	1.90371	-3.40202	0.000668894	0.0189594	--	--	--	--	--	--	--	--	--	--	--
TRINITY_DN162662_c0_g1_i1	7191.95	-6.35885	0.517356	-8.42524	3.60015423365056E--017	2.23097e-14	XP_008807113.1	--	--	--	--	--	--	--	--	--	--
TRINITY_DN162662_c0_g2_i1	7894.1	-6.53586	0.454434	-9.98134	1.83959348075737E--023	2.422438015244E--020	XP_008807113.1	--	--	--	--	--	--	--	--	--	--
TRINITY_DN1627_c0_g1_i1	186.171	-6.76867	0.70192	-6.79375	1.09254e-11	2.83023e-09	XP_020272248.1	--	--	--	--	--	--	--	--	--	--
TRINITY_DN1627_c0_g2_i1	637.267	-5.26773	0.453769	-7.2013	5.9642e-13	1.81243e-10	--	--	--	--	--	--	--	--	--	--	--
TRINITY_DN16275_c0_g1_i1	75.8945	-9.91727	2.01208	-3.93488	8.32395e-05	0.00354065	--	--	--	--	--	--	--	--	--	--	--
TRINITY_DN16382_c0_g1_i1	74.0887	-9.88324	1.6164	-4.87702	1.077e-06	8.93369e-05	--	--	--	--	--	--	--	--	--	--	--
TRINITY_DN16383_c2_g2_i1	96.7547	-10.2683	1.58595	-5.2135	1.85308e-07	1.84166e-05	--	--	--	--	--	--	--	--	--	--	--
TRINITY_DN16440_c0_g1_i1	5518.15	-13.4447	2.38108	-4.80654	1.53565e-06	0.000121029	--	--	--	--	--	--	--	--	--	--	--
TRINITY_DN16587_c0_g1_i1	356.499	-5.66297	0.81679	-4.4846	7.30513e-06	0.000455367	XP_020249780.1	--	--	--	--	--	--	--	T	678320713	M--type_MADS
TRINITY_DN16823_c0_g1_i3	56.3043	-9.49029	1.67852	-4.46244	8.10298e-06	0.000493423	--	--	--	--	--	--	--	--	--	--	--
TRINITY_DN16842_c0_g1_i2	29.2714	-8.54515	1.80626	-3.62359	0.000290546	0.00960503	XP_020263727.1	--	--	--	--	--	--	--	--	--	--
TRINITY_DN1685_c1_g1_i2	884.947	-4.6652	0.587463	-4.5368	5.71153e-06	0.000369892	XP_020599778.1	--	--	--	--	--	--	--	--	Gh_D11G0701	NAC
TRINITY_DN169_c0_g1_i1	416.089	-3.99762	0.520014	-3.84148	0.000122296	0.00478941	ONK58878.1	--	--	--	--	--	--	--	--	--	--
TRINITY_DN169_c0_g3_i1	156.389	-4.58294	0.629834	-4.10098	4.1141e-05	0.00195228	ONK58878.1	--	--	--	--	--	--	--	--	--	--
TRINITY_DN1706_c2_g1_i1	636.874	-5.45588	0.534039	-6.47121	9.72191e-11	2.03478e-08	--	--	--	--	--	--	--	--	S	--	--
TRINITY_DN17060_c0_g1_i2	279.74	-3.90323	0.560573	-3.39515	0.000685918	0.0193206	--	--	--	--	--	--	--	--	--	--	--
TRINITY_DN17417_c0_g1_i1	65.8167	-9.71614	1.81746	-4.24557	2.18038e-05	0.00110431	--	--	--	--	--	--	--	--	--	--	--
TRINITY_DN17446_c0_g1_i1	5120.17	-3.5169	0.344301	-4.40574	1.05426e-05	0.000610408	XP_010909100.1	glutathione S--transferase T1	LOC105035281	Elaeis guineensis var. tenera (Oil palm)	glutathione transferase activity [GO:0004364]	--	glutathione metabolic process [GO:0006749]	--	--	--	--
TRINITY_DN17511_c0_g1_i2	569.525	-3.6269	0.521378	-3.12038	0.0018062	0.0424411	XP_010909564.1	long chain acyl--CoA synthetase 2	LOC105035642	Elaeis guineensis var. tenera (Oil palm)	--	--	--	--	--	--	--
TRINITY_DN17616_c0_g1_i2	35.0977	-8.80628	1.75101	-3.88705	0.000101468	0.0041735	--	--	--	--	--	--	--	--	--	--	--
TRINITY_DN17710_c0_g1_i1	23.097	-8.20017	1.94634	-3.18555	0.0014448	0.0357289	--	--	--	--	--	--	--	--	--	--	--
TRINITY_DN17734_c0_g1_i6	202.183	-3.8021	0.576881	-3.12386	0.00178493	0.0420909	--	--	--	--	--	--	--	--	--	--	--
TRINITY_DN17742_c0_g1_i18	337.266	-4.49903	0.515679	-4.84608	1.25923e-06	0.000102042	XP_020261753.1	--	--	--	--	--	--	--	Q	--	--
TRINITY_DN17882_c0_g1_i1	237.287	-5.59294	0.95739	-3.75285	0.000174835	0.00647668	XP_010925682.1	basic leucine zipper 61	LOC105048165	Elaeis guineensis var. tenera (Oil palm)	DNA--binding transcription factor activity [GO:0003700]	--	--	--	--	XP_010925682.1	bZIP
TRINITY_DN179269_c0_g2_i1	1861.87	-6.22901	0.570281	-7.41566	1.21019e-13	4.29741e-11	XP_009391415.1	--	--	--	--	--	--	--	--	--	--
TRINITY_DN17952_c0_g1_i1	348.895	-6.2554	0.815153	-5.22038	1.78558e-07	1.78018e-05	XP_020276193.1	--	--	--	--	--	--	--	--	--	--
TRINITY_DN179545_c0_g1_i1	112.385	-5.47382	0.697171	-4.98273	6.2692e-07	5.53441e-05	XP_020244259.1	--	--	--	--	--	--	--	--	OPUNC05G25400.1	MYB_related
TRINITY_DN18034_c1_g3_i2	1228.52	-9.88293	0.829712	-9.5008	2.08278956259994E--021	2.12337036569059E--018	XP_008811620.1	--	--	--	--	--	--	--	CG	PH01002606G0040	HSF
TRINITY_DN18034_c1_g4_i1	624.464	-10.5765	1.17124	-7.32253	2.43334e-13	8.07173e-11	XP_008811620.1	--	--	--	--	--	--	--	--	Sme2.5_06310.1_g00004.1	WRKY
TRINITY_DN1827_c0_g4_i1	3888.96	-4.28158	0.587141	-3.88591	0.000101947	0.0041735	XP_020246451.1	--	--	--	--	--	--	--	--	--	--
TRINITY_DN18294_c0_g1_i4	8221.92	-4.3077	0.404014	-5.71194	1.11698e-08	1.52818e-06	AQX44177.1	Photosynthetic NDH subcomplex L 2	2 PQL1	Apostasia odorata	calcium ion binding [GO:0005509]	extrinsic component of membrane [GO:0019898]; photosystem II oxygen evolving complex [GO:0009654]	photosynthesis [GO:0015979]	--	--	--	--
TRINITY_DN18437_c1_g1_i1	35.9177	-8.83719	1.81507	-3.76691	0.000165279	0.00619631	--	--	--	--	--	--	--	--	--	--	--
TRINITY_DN18462_c0_g1_i6	22.2769	-8.15245	1.92424	-3.19734	0.00138702	0.0345433	--	--	--	--	--	--	--	--	--	--	--
TRINITY_DN18518_c0_g1_i2	59.4452	-9.5641	1.83107	-4.13098	3.6122e-05	0.00173495	--	--	--	--	--	--	--	--	--	--	--
TRINITY_DN18691_c0_g1_i1	312.51	-4.66604	0.659235	-4.04415	5.25138e-05	0.00240529	--	--	--	--	--	--	--	--	--	--	--
TRINITY_DN18698_c0_g1_i4	381.175	-3.90702	0.468503	-4.07045	4.69226e-05	0.00218401	XP_020260743.1	--	--	--	--	--	--	--	--	--	--
TRINITY_DN1871_c0_g2_i5	1728.04	-3.38953	0.263569	-5.27199	1.34952e-07	1.38926e-05	XP_020243386.1	--	--	--	--	--	--	--	--	--	--
TRINITY_DN1871_c0_g3_i2	1016.99	-3.4683	0.282251	-5.20209	1.97057e-07	1.94618e-05	XP_020243386.1	--	--	--	--	--	--	--	--	--	--
TRINITY_DN18720_c0_g1_i1	123.408	-22.5346	4.78525	-4.29122	1.77692e-05	0.000948609	XP_026282951.1	--	--	--	--	--	--	--	--	--	--
TRINITY_DN18728_c0_g1_i1	5443.37	-3.44544	0.399069	-3.62202	0.000292308	0.00965319	--	--	--	--	--	--	--	--	--	--	--
TRINITY_DN18754_c0_g1_i2	4579.8	-4.08408	0.612287	-3.40376	0.000664653	0.018873	XP_020251645.1	--	--	--	--	--	--	--	--	--	--
TRINITY_DN18794_c0_g2_i1	86.0058	-10.0984	1.59843	-5.06649	4.05226e-07	3.73375e-05	--	--	--	--	--	--	--	--	--	--	--
TRINITY_DN1891_c0_g4_i1	38.974	-5.94985	1.16856	-3.3801	0.000724596	0.0201941	--	--	--	--	--	--	--	--	--	--	--
TRINITY_DN18924_c0_g1_i1	117.225	-5.61289	0.927836	-3.89389	9.86502e-05	0.00407016	--	--	--	--	--	--	--	--	--	--	--
TRINITY_DN18949_c0_g1_i1	7626.49	-3.22084	0.357386	-3.41604	0.000635388	0.0181891	XP_020269863.1	--	--	--	--	--	--	--	--	--	--
TRINITY_DN19106_c0_g1_i1	995.417	-4.03926	0.522513	-3.90279	9.50919e-05	0.00395008	XP_020274058.1	--	--	--	--	--	--	--	--	--	--
TRINITY_DN19195_c0_g1_i1	2683.39	-3.62579	0.46727	-3.47933	0.000502665	0.0149729	AFG19394.1	Lycopene epsilon cyclase	--	Narcissus tazetta subsp. chinensis	oxidoreductase activity, acting on paired donors, with incorporation or reduction of molecular oxygen [GO:0016705]	integral component of membrane [GO:0016021]	carotenoid biosynthetic process [GO:0016117]	PATHWAY: Carotenoid biosynthesis. {ECO:0000256|ARBA:ARBA00004829}.	--	--	--
TRINITY_DN193614_c0_g1_i1	84.1259	-22.802	4.78549	-4.3469	1.38075e-05	0.000763306	XP_026286024.1	--	--	--	--	--	--	--	--	Achn050491	MYB_related
TRINITY_DN19563_c0_g1_i4	442.793	-4.30266	0.621279	-3.70632	0.000210295	0.00747601	XP_020259934.1	--	--	--	--	--	--	--	I	KN538722.1_FGP037	HB--PHD
TRINITY_DN19599_c1_g1_i1	328.15	-12.0313	2.6956	-3.72135	0.000198159	0.00710048	XP_020248414.1	--	--	--	--	--	--	--	--	--	--
TRINITY_DN1972_c0_g1_i2	17793.4	-5.0627	0.508363	-6.02463	1.69497e-09	2.79e-07	--	--	--	--	--	--	--	--	--	--	--
TRINITY_DN19766_c0_g1_i1	27575.4	-4.1486	0.51532	-4.16945	3.05338e-05	0.00148918	XP_020255448.1	--	--	--	--	--	--	--	--	--	--
TRINITY_DN19766_c0_g2_i9	17186.6	-3.89573	0.46408	-4.08493	4.40907e-05	0.00206436	XP_020106313.1	Carbonic anhydrase (EC 4.2.1.1) (Carbonate dehydratase)	LOC109722624	Ananas comosus (Pineapple) (Ananas ananas)	carbonate dehydratase activity [GO:0004089]; zinc ion binding [GO:0008270]	--	carbon utilization [GO:0015976]	--	--	--	--
TRINITY_DN19766_c0_g3_i1	29267.6	-4.21527	0.495545	-4.47038	7.80811e-06	0.000480093	XP_020255448.1	--	--	--	--	--	--	--	--	--	--
TRINITY_DN2031_c0_g1_i1	30348	-6.4583	0.538997	-8.27148	1.32307052150318E--016	7.08717e-14	--	--	--	--	--	--	--	--	--	--	--
TRINITY_DN20316_c1_g1_i4	21.5813	-8.10225	1.97216	-3.0942	0.00197346	0.0456583	--	--	--	--	--	--	--	--	--	--	--
TRINITY_DN20326_c0_g1_i4	39.1146	-6.60464	1.40385	-3.28002	0.001038	0.0271789	ACI95260.1	Dehydration--responsive element binding protein	TINY	Aloe vera (Aloe) (Aloe barbadensis)	DNA binding [GO:0003677]; DNA--binding transcription factor activity [GO:0003700]	nucleus [GO:0005634]	--	--	Q	XP_010910974.1	ERF
TRINITY_DN20335_c0_g1_i3	25.1417	-8.3283	1.94146	-3.25956	0.00111585	0.0289298	--	--	--	--	--	--	--	--	--	--	--
TRINITY_DN20386_c0_g1_i2	4395.21	-4.77261	0.698864	-3.96731	7.26894e-05	0.0031438	--	--	--	--	--	--	--	--	--	--	--
TRINITY_DN20436_c0_g1_i1	208.218	-11.374	1.72516	-5.43371	5.51947e-08	6.18572e-06	XP_020246857.1	--	--	--	--	--	--	--	--	--	--
TRINITY_DN20549_c0_g1_i4	27902	-3.71744	0.363391	-4.72614	2.28827e-06	0.000168968	XP_023522081.1	--	--	--	--	--	--	--	--	--	--
TRINITY_DN20578_c0_g1_i1	81.2489	-10.0152	1.74559	-4.59172	4.39598e-06	0.000298775	XP_020252127.1	--	--	--	--	--	--	--	ADK	Seita.8G101000.1.p	MYB
TRINITY_DN206773_c0_g2_i1	86.2117	-22.8103	4.78547	-4.34863	1.36989e-05	0.00076088	KAE8740359.1	--	--	--	--	--	--	--	--	--	--
TRINITY_DN2072_c0_g1_i8	782.899	-3.43701	0.42823	-3.35569	0.000791665	0.0217563	XP_020276416.1	--	--	--	--	--	--	--	--	PDK_30s728141g003	G2--like
TRINITY_DN2075_c0_g1_i18	6203.88	-6.84748	0.776746	-6.24076	4.35459e-10	8.09544e-08	--	--	--	--	--	--	--	--	--	--	--
TRINITY_DN20799_c0_g1_i1	465.765	-5.74081	0.591327	-6.32613	2.51386e-10	4.99674e-08	XP_019702780.1	E3 ubiquitin--protein ligase SGR9, amyloplastic	LOC105035101	Elaeis guineensis var. tenera (Oil palm)	--	--	--	--	--	--	--
TRINITY_DN208213_c0_g2_i2	31.9695	-8.67494	1.88211	-3.54653	0.000390345	0.0122143	--	--	--	--	--	--	--	--	--	--	--
TRINITY_DN20865_c0_g3_i3	2414.1	-3.38978	0.428176	-3.24582	0.00117115	0.0299458	XP_020268661.1	--	--	--	--	--	--	--	S	FANhyb_rscf00002064.1.g00002.1	B3
TRINITY_DN20975_c0_g1_i4	74.4224	-9.88956	1.62006	-4.86991	1.1165e-06	9.21301e-05	XP_008372874.2	--	--	--	--	--	--	--	S	--	--
TRINITY_DN2105_c1_g1_i2	54491.1	-4.25218	0.491443	-4.58278	4.58825e-06	0.000310508	--	--	--	--	--	--	--	--	--	--	--
TRINITY_DN21118_c0_g1_i5	66.6025	-5.84923	1.15827	-3.32327	0.000889701	0.02391	--	--	--	--	--	--	--	--	--	--	--
TRINITY_DN21177_c0_g2_i1	183.861	-4.87474	0.898886	-3.19811	0.00138332	0.0345054	RWV89205.1	Uncharacterized protein	GW17_00048650	Ensete ventricosum (Abyssinian banana) (Musa ensete)	--	--	--	--	S	--	--
TRINITY_DN21237_c2_g1_i1	373.329	-7.78477	0.656508	-8.81143	1.23559332981446E--018	9.29754561796576E--016	--	--	--	--	--	--	--	--	--	--	--
TRINITY_DN21512_c0_g1_i1	70.0652	-5.91356	1.09396	-3.57744	0.000346975	0.0111215	XP_020248227.1	--	--	--	--	--	--	--	O	--	--
TRINITY_DN2157_c0_g1_i1	4602.95	-4.24369	0.37812	-5.9338	2.96009e-09	4.47611e-07	XP_020246687.1	--	--	--	--	--	--	--	--	--	--
TRINITY_DN21594_c0_g1_i1	525.671	-4.40423	0.632918	-3.79864	0.000145494	0.00554668	XP_020244345.1	--	--	--	--	--	--	--	--	Csa09g092790.1	BES1
TRINITY_DN216019_c0_g1_i1	29825	-4.46696	0.562078	-4.389	1.13874e-05	0.000651968	AFO67221.1	Chlorophyll a--b binding protein, chloroplastic (Fragment)	--	Aralia elata (Japanese angelica tree)	chlorophyll binding [GO:0016168]	chloroplast thylakoid membrane [GO:0009535]; photosystem I [GO:0009522]; photosystem II [GO:0009523]	photosynthesis, light harvesting [GO:0009765]; protein--chromophore linkage [GO:0018298]	--	C	Bradi3g42627.5.p	ERF
TRINITY_DN21692_c0_g3_i1	43.33	-9.1112	1.701	-4.18061	2.90723e-05	0.00142229	--	--	--	--	--	--	--	--	--	--	--
TRINITY_DN21756_c0_g1_i8	240.993	-4.1746	0.568551	-3.82482	0.00013087	0.0050811	--	--	--	--	--	--	--	--	--	--	--
TRINITY_DN21833_c0_g2_i3	45.4428	-9.17644	1.79425	-3.99969	6.34252e-05	0.00279566	--	--	--	--	--	--	--	--	--	--	--
TRINITY_DN21872_c0_g1_i1	58.4586	-9.54045	1.69014	-4.46143	8.14152e-06	0.000494817	--	--	--	--	--	--	--	--	--	--	--
TRINITY_DN219317_c0_g1_i1	25.8919	-8.36491	1.91067	-3.33124	0.000864585	0.0233541	XP_009400894.1	--	--	--	--	--	--	--	K	XP_010919644.1	ERF
TRINITY_DN219575_c0_g1_i1	13837.1	-7.58271	0.420762	-13.2681	3.54497055738436E--040	2.80088123738939E--036	XP_020247521.1	--	--	--	--	--	--	--	--	--	--
TRINITY_DN219608_c2_g1_i1	1919.74	-4.04928	0.529329	-3.87147	0.000108182	0.00437438	PHT91381.1	Ribulose bisphosphate carboxylase small subunit (RuBisCO small subunit)	T459_06494	Capsicum annuum (Capsicum pepper)	monooxygenase activity [GO:0004497]; ribulose--bisphosphate carboxylase activity [GO:0016984]	chloroplast [GO:0009507]	carbon fixation [GO:0015977]; photorespiration [GO:0009853]; photosynthesis [GO:0015979]	--	--	--	--
TRINITY_DN220578_c0_g1_i1	143.568	-6.96235	1.10953	-4.47248	7.73194e-06	0.000477347	--	--	--	--	--	--	--	--	--	--	--
TRINITY_DN22134_c0_g2_i1	40.3684	-9.01064	1.75902	-3.98554	6.73265e-05	0.00292681	XP_020244599.1	--	--	--	--	--	--	--	--	PDK_30s65509404g004	MYB
TRINITY_DN221828_c0_g1_i1	81.9687	-6.12962	1.01508	-4.06825	4.73667e-05	0.00219821	--	--	--	--	--	--	--	--	--	--	--
TRINITY_DN223280_c0_g1_i1	100.812	-22.9579	4.78537	-4.37958	1.18911e-05	0.000674696	XP_026272899.1	--	--	--	--	--	--	--	--	--	--
TRINITY_DN22440_c0_g1_i3	48.4192	-9.27019	1.67655	-4.33641	1.44827e-05	0.000793261	BAE06061.1	Xyloglucan endotransglucosylase/hydrolase (EC 2.4.1.207) (Fragment)	SpXTH2	Sagittaria pygmaea	hydrolase activity, hydrolyzing O--glycosyl compounds [GO:0004553]; xyloglucan:xyloglucosyl transferase activity [GO:0016762]	apoplast [GO:0048046]; cell wall [GO:0005618]	cellular glucan metabolic process [GO:0006073]; cell wall organization [GO:0071555]	--	--	Lus10007348	MYB_related
TRINITY_DN22533_c0_g2_i2	374.107	-5.32656	0.497944	-6.68058	2.38001e-11	5.53073e-09	XP_020274998.1	--	--	--	--	--	--	--	--	--	--
TRINITY_DN225363_c0_g1_i1	3018.11	-5.74926	0.928007	-4.04012	5.34237e-05	0.00244342	PKA54209.1	Fasciclin--like arabinogalactan protein 8	FLA8 AXF42_Ash000042	Apostasia shenzhenica	--	--	--	--	--	GSVIVT01030085001	NF--YB
TRINITY_DN226444_c0_g1_i1	45.5257	-9.17906	2.02305	-3.54862	0.000387251	0.0121657	XP_020265105.1	--	--	--	--	--	--	--	--	--	--
TRINITY_DN227586_c0_g1_i1	29.9797	-8.57566	2.08412	-3.15513	0.00160428	0.0389114	--	--	--	--	--	--	--	--	S	--	--
TRINITY_DN229155_c0_g1_i1	38.7398	-8.94639	2.25201	-3.08452	0.00203878	0.0468688	XP_026275100.1	--	--	--	--	--	--	--	--	--	--
TRINITY_DN22956_c0_g2_i3	112.231	-4.06767	0.665142	-3.10861	0.00187968	0.043777	--	--	--	--	--	--	--	--	--	--	--
TRINITY_DN229876_c0_g1_i1	144.128	-9.39261	1.54069	-4.79826	1.60049e-06	0.000124586	XP_020251881.1	--	--	--	--	--	--	--	--	mrna16933.1--v1.0--hybrid	M--type_MADS
TRINITY_DN23083_c0_g1_i2	67.0408	-4.7829	0.905131	-3.07458	0.00210797	0.0481013	XP_020254230.1	--	--	--	--	--	--	--	--	--	--
TRINITY_DN2321_c0_g1_i2	4649.12	-3.76386	0.455063	-3.87608	0.000106155	0.00430118	XP_020276097.1	--	--	--	--	--	--	--	--	--	--
TRINITY_DN23323_c0_g1_i16	205.223	-3.89261	0.44338	-4.26859	1.96714e-05	0.00102253	--	--	--	--	--	--	--	--	--	--	--
TRINITY_DN23505_c0_g2_i2	26.8655	-8.41922	1.85363	-3.46306	0.000534067	0.0157744	--	--	--	--	--	--	--	--	--	--	--
TRINITY_DN2355_c0_g2_i1	315.2	-7.81824	0.752285	-7.73409	1.04146e-14	4.21979e-12	--	--	--	--	--	--	--	--	--	--	--
TRINITY_DN23583_c1_g2_i1	38.1016	-8.92662	1.74788	-3.96287	7.4053e-05	0.00318418	--	--	--	--	--	--	--	--	--	--	--
TRINITY_DN236207_c0_g1_i1	117.291	-8.17037	1.23357	-5.00203	5.67296e-07	5.05037e-05	--	--	--	--	--	--	--	--	--	--	--
TRINITY_DN2364_c0_g1_i3	652.636	-8.01945	1.07126	-5.61904	1.92021e-08	2.4372e-06	AAF36437.1	Cysteine--sulphoxide lyase	--	Allium cepa (Onion)	carbon--sulfur lyase activity [GO:0016846]	integral component of membrane [GO:0016021]	--	--	--	--	--
TRINITY_DN23785_c0_g2_i2	6308.75	-5.21392	0.439241	-7.31698	2.53605e-13	8.17851e-11	--	--	--	--	--	--	--	--	--	--	--
TRINITY_DN2454_c1_g1_i2	218.847	-3.74697	0.461186	-3.788	0.000151867	0.00576183	--	--	--	--	--	--	--	--	--	--	--
TRINITY_DN24552_c0_g1_i2	1534.54	-4.06557	0.469637	-4.39824	1.09132e-05	0.000628237	--	--	--	--	--	--	--	--	--	--	--
TRINITY_DN245891_c0_g1_i1	80.5204	-5.99836	0.846819	-4.72163	2.33967e-06	0.000171961	--	--	--	--	--	--	--	--	--	--	--
TRINITY_DN24595_c0_g1_i11	760.471	-3.10253	0.294143	-3.74829	0.000178046	0.00655822	AEX96408.1	NAD(P)H dehydrogenase, chain 4 (NAD(P)H--quinone oxidoreductase chain 4, chloroplastic) (NADH--plastoquinone oxidoreductase chain 4) (Fragment)	ndhD	Allium cepa (Onion)	NADH dehydrogenase (ubiquinone) activity [GO:0008137]	chloroplast [GO:0009507]; integral component of membrane [GO:0016021]	ATP synthesis coupled electron transport [GO:0042773]	--	S	--	--
TRINITY_DN246_c1_g4_i2	82.5064	-7.09089	1.08869	-4.67615	2.92315e-06	0.000207603	--	--	--	--	--	--	--	--	--	--	--
TRINITY_DN24625_c0_g1_i1	558.81	-5.69006	0.680649	-5.42138	5.91402e-08	6.60447e-06	XP_020261624.1	--	--	--	--	--	--	--	--	--	--
TRINITY_DN246742_c0_g1_i1	35.8492	-8.84011	1.85141	-3.69453	0.00022029	0.0077442	--	--	--	--	--	--	--	--	--	--	--
TRINITY_DN2486_c2_g1_i2	508.403	-4.33787	0.634169	-3.68652	0.000227344	0.00793045	XP_020263644.1	--	--	--	--	--	--	--	--	--	--
TRINITY_DN24880_c0_g1_i1	24.029	-8.26144	1.88912	-3.31447	0.000918156	0.0245494	--	--	--	--	--	--	--	--	--	--	--
TRINITY_DN24897_c0_g1_i1	155.737	-23.6568	4.78514	-4.52583	6.01582e-06	0.000387218	XP_026272117.1	--	--	--	--	--	--	--	--	PEQU_11640	NAC
TRINITY_DN25026_c0_g1_i2	26.407	-8.39854	1.88642	-3.39189	0.000694124	0.019517	--	--	--	--	--	--	--	--	--	--	--
TRINITY_DN25065_c0_g1_i1	55.2601	-9.45893	1.73203	-4.30646	1.65889e-05	0.000894667	--	--	--	--	--	--	--	--	--	--	--
TRINITY_DN25182_c0_g1_i2	341.776	-7.27435	1.46501	-3.60022	0.000317953	0.0103062	OBQ46459.1	--	--	--	--	--	--	--	--	--	--
TRINITY_DN2591_c0_g1_i1	1769.32	-4.19476	0.58223	-3.76957	0.000163531	0.00614533	--	--	--	--	--	--	--	--	--	--	--
TRINITY_DN2591_c0_g2_i1	1853.98	-4.28747	0.579798	-3.94528	7.97053e-05	0.00340406	--	--	--	--	--	--	--	--	--	--	--
TRINITY_DN26571_c0_g1_i1	113.674	-23.2166	4.78529	-4.43371	9.26262e-06	0.000553376	AHB12474.1	--	--	--	--	--	--	--	--	PH01001113G0580	MIKC_MADS
TRINITY_DN26573_c0_g1_i3	57.8593	-9.52585	2.22718	-3.37909	0.000727267	0.0202507	XP_026286222.1	--	--	--	--	--	--	--	--	--	--
TRINITY_DN26669_c0_g2_i1	24.4875	-8.28431	1.93838	-3.24204	0.00118679	0.0302966	--	--	--	--	--	--	--	--	--	--	--
TRINITY_DN26844_c0_g1_i1	59.5533	-6.27262	1.37812	-3.10032	0.00193312	0.0448563	--	--	--	--	--	--	--	--	--	--	--
TRINITY_DN26980_c0_g1_i2	222.108	-8.40456	0.977034	-6.5551	5.56031e-11	1.22887e-08	--	--	--	--	--	--	--	--	S	--	--
TRINITY_DN27068_c0_g1_i8	442.548	-3.91694	0.580158	-3.30416	0.000952604	0.0253418	XP_020256136.1	--	--	--	--	--	--	--	--	CCG000365.1	NAC
TRINITY_DN272327_c0_g1_i1	77.1733	-22.6818	4.78556	-4.32172	1.5482e-05	0.000843611	XP_026286524.1	--	--	--	--	--	--	--	--	--	--
TRINITY_DN272635_c0_g1_i1	1021.69	-6.36531	0.561127	-7.77953	7.27920046963351E--015	3.06736e-12	XP_008803816.1	--	--	--	--	--	--	--	--	--	--
TRINITY_DN27326_c0_g1_i1	39.729	-8.98829	1.82616	-3.82676	0.000129842	0.00504739	--	--	--	--	--	--	--	--	--	--	--
TRINITY_DN275044_c0_g1_i1	1942.48	-5.54587	0.786193	-4.51018	6.47733e-06	0.00041024	XP_010265215.1	protein ASPARTIC PROTEASE IN GUARD CELL 1	LOC104603014	Nelumbo nucifera (Sacred lotus)	aspartic--type endopeptidase activity [GO:0004190]	integral component of membrane [GO:0016021]	--	--	--	Aco017242.1	Trihelix
TRINITY_DN27597_c0_g1_i10	119.077	-6.91022	1.55603	-3.15561	0.00160164	0.0388773	XP_010919573.1	Cyclin	LOC105043645	Elaeis guineensis var. tenera (Oil palm)	protein kinase binding [GO:0019901]	--	regulation of cyclin--dependent protein serine/threonine kinase activity [GO:0000079]	--	--	Gh_A08G1256	WRKY
TRINITY_DN27607_c0_g3_i1	112.364	-6.62429	1.23355	-3.74877	0.000177707	0.0065534	--	--	--	--	--	--	--	--	--	--	--
TRINITY_DN276757_c0_g1_i1	167.172	-4.82132	0.777441	-3.62898	0.000284544	0.00943624	XP_020256169.1	--	--	--	--	--	--	--	--	--	--
TRINITY_DN277308_c0_g1_i1	244.289	-4.59516	0.601766	-4.31257	1.61369e-05	0.000874771	XP_020274639.1	--	--	--	--	--	--	--	--	676766192	BES1
TRINITY_DN278_c1_g1_i1	121.676	-4.9986	0.821743	-3.64907	0.000263193	0.00891242	--	--	--	--	--	--	--	--	--	--	--
TRINITY_DN278405_c0_g1_i1	557.224	-5.29199	0.857677	-3.83826	0.000123909	0.00484657	--	--	--	--	--	--	--	--	--	--	--
TRINITY_DN278405_c0_g2_i1	551.462	-5.90549	0.715183	-5.46082	4.73943e-08	5.44672e-06	--	--	--	--	--	--	--	--	--	--	--
TRINITY_DN27858_c0_g2_i1	26.2539	-8.38912	1.85509	-3.44411	0.000572948	0.0167662	--	--	--	--	--	--	--	--	--	--	--
TRINITY_DN2824_c0_g1_i12	1111.62	-4.42873	0.60382	-4.02228	5.76375e-05	0.00258013	ABM66367.1	Anthocyanidin synthase	ANS	Allium cepa (Onion)	metal ion binding [GO:0046872]; oxidoreductase activity [GO:0016491]	--	--	--	--	676709864	STAT
TRINITY_DN2838_c0_g2_i1	4433.11	-8.19799	0.953236	-6.50204	7.92359e-11	1.66945e-08	AAO63020.1	Putative chalcone synthase A	--	Allium cepa (Onion)	transferase activity, transferring acyl groups other than amino--acyl groups [GO:0016747]	--	biosynthetic process [GO:0009058]	--	H	--	--
TRINITY_DN284039_c0_g1_i1	39.9231	-8.99281	1.71832	-4.06957	4.71008e-05	0.00218908	--	--	--	--	--	--	--	--	--	--	--
TRINITY_DN28410_c0_g1_i1	3880.4	-5.29381	0.521502	-6.31601	2.68403e-10	5.2687e-08	--	--	--	--	--	--	--	--	--	--	--
TRINITY_DN28411_c0_g1_i1	3000.35	-3.82724	0.544988	-3.35281	0.000799965	0.0219653	XP_025636383.1	--	--	--	--	--	--	--	--	--	--
TRINITY_DN285442_c0_g1_i1	57.4165	-9.51779	1.65255	-4.54921	5.38485e-06	0.000355288	XP_020251304.1	--	--	--	--	--	--	--	--	--	--
TRINITY_DN287209_c0_g1_i1	257.977	-3.47585	0.406167	-3.63361	0.000279488	0.00932729	XP_020248705.1	--	--	--	--	--	--	--	--	--	--
TRINITY_DN287209_c0_g2_i1	297.352	-3.54797	0.470677	-3.28883	0.00100607	0.0265628	XP_020248705.1	--	--	--	--	--	--	--	--	--	--
TRINITY_DN28922_c0_g1_i1	321.693	-5.08288	0.789364	-3.90553	9.40208e-05	0.0039201	AQR58515.1	Flavonol synthase (EC 1.14.11.23)	--	Allium cepa (Onion)	metal ion binding [GO:0046872]; oxidoreductase activity [GO:0016491]	--	--	--	--	Achn004841	NAC
TRINITY_DN290628_c0_g1_i1	77.8686	-22.0276	4.78555	-4.185	2.85162e-05	0.00140074	XP_026293024.1	--	--	--	--	--	--	--	--	--	--
TRINITY_DN29086_c0_g1_i1	814.422	-3.94619	0.563172	-3.45577	0.000548733	0.0161172	Q6QHK0.1	--	--	--	--	--	--	--	--	Csa07g061600.1	NAC
TRINITY_DN29201_c0_g1_i1	33.3033	-8.72761	1.90404	-3.53333	0.000410353	0.0127771	--	--	--	--	--	--	--	--	--	--	--
TRINITY_DN2921_c0_g1_i1	4661.34	-8.76347	0.534137	-12.6624	9.54995927041669E--037	6.03633825564498E--033	--	--	--	--	--	--	--	--	--	--	--
TRINITY_DN2921_c0_g2_i1	52.1607	-9.38069	1.74415	-4.23169	2.31944e-05	0.00116726	--	--	--	--	--	--	--	--	--	--	--
TRINITY_DN29279_c0_g1_i5	798.998	-6.12237	0.531585	-7.75485	8.84458475140188E--015	3.63019e-12	--	--	--	--	--	--	--	--	L	--	--
TRINITY_DN2945_c0_g1_i1	9168.29	-4.56405	0.299348	-8.56547	1.07640501987741E--017	7.39537048874038E--015	CAC06712.1	Beta--carotene hydroxylase	--	Narcissus pseudonarcissus (Daffodil)	iron ion binding [GO:0005506]; oxidoreductase activity [GO:0016491]	integral component of membrane [GO:0016021]	lipid biosynthetic process [GO:0008610]	--	--	--	--
TRINITY_DN295900_c0_g1_i1	85.3476	-6.79137	1.33272	-3.59519	0.00032416	0.0104645	--	--	--	--	--	--	--	--	--	--	--
TRINITY_DN29812_c1_g3_i2	40.1168	-8.99625	1.94528	-3.59652	0.000322503	0.0104217	XP_020260114.1	--	--	--	--	--	--	--	--	XP_010106869.1	HB--other
TRINITY_DN30079_c0_g1_i1	118.528	-10.5608	1.89906	-4.50792	6.54655e-06	0.000413794	XP_010920538.1	Laccase (EC 1.10.3.2) (Benzenediol:oxygen oxidoreductase) (Diphenol oxidase) (Urishiol oxidase)	LOC105044372	Elaeis guineensis var. tenera (Oil palm)	copper ion binding [GO:0005507]; hydroquinone:oxygen oxidoreductase activity [GO:0052716]	apoplast [GO:0048046]	lignin catabolic process [GO:0046274]	--	--	Rsa1.0_03034.1_g00001.1	ERF
TRINITY_DN30204_c0_g1_i1	29.7302	-8.56729	1.79995	-3.6486	0.000263673	0.00891242	--	--	--	--	--	--	--	--	--	--	--
TRINITY_DN30315_c1_g1_i3	126.658	-3.78099	0.523225	-3.40387	0.000664387	0.018873	--	--	--	--	--	--	--	--	--	--	--
TRINITY_DN3038_c0_g1_i1	35.5426	-8.82385	1.75232	-3.89418	9.85297e-05	0.00407016	--	--	--	--	--	--	--	--	--	--	--
TRINITY_DN30517_c0_g1_i2	9525.01	-4.63274	0.510935	-5.15279	2.56646e-07	2.48044e-05	KRY99200.1	--	--	--	--	--	--	--	--	Bradi3g42627.5.p	ERF
TRINITY_DN30833_c0_g1_i1	222.91	-4.45764	0.691952	-3.55176	0.000382667	0.0120697	--	--	--	--	--	--	--	--	--	--	--
TRINITY_DN314_c8_g1_i1	71.0298	-9.82354	1.60936	-4.86129	1.16623e-06	9.54855e-05	--	--	--	--	--	--	--	--	--	--	--
TRINITY_DN31688_c1_g1_i3	24.4181	-8.2816	1.88351	-3.33504	0.000852864	0.0231416	--	--	--	--	--	--	--	--	--	--	--
TRINITY_DN3169_c0_g1_i1	13482.9	-3.36498	0.445784	-3.06199	0.00219871	0.0498123	XP_020246478.1	--	--	--	--	--	--	--	--	--	--
TRINITY_DN31769_c0_g1_i1	335.916	-5.46058	0.611488	-5.65927	1.52016e-08	2.03573e-06	XP_020256859.1	--	--	--	--	--	--	--	K	Zosma77g00480.1	C2H2
TRINITY_DN319076_c0_g1_i1	64.978	-7.17261	1.33624	-3.87103	0.000108377	0.00437438	--	--	--	--	--	--	--	--	--	--	--
TRINITY_DN319589_c0_g1_i1	188.671	-11.2322	1.53011	-6.0337	1.60245e-09	2.66547e-07	--	--	--	--	--	--	--	--	--	--	--
TRINITY_DN319939_c0_g1_i1	4204.46	-10.8676	0.656163	-13.5144	1.28649631719987E--041	1.35528098695949E--037	ACY92095.1	Photosystem I subunit H	PsaH	Lycoris radiata (Hurricane lily) (Red spiderlily)	--	chloroplast thylakoid membrane [GO:0009535]; integral component of membrane [GO:0016021]; photosystem I reaction center [GO:0009538]	photosynthesis [GO:0015979]	--	--	--	--
TRINITY_DN320177_c0_g1_i1	63.8248	-9.66718	2.04633	-3.7468	0.000179106	0.0065896	XP_020245182.1	--	--	--	--	--	--	--	--	--	--
TRINITY_DN320188_c0_g1_i1	781.046	-7.39264	0.811827	-6.6426	3.08203e-11	6.96943e-09	--	--	--	--	--	--	--	--	--	--	--
TRINITY_DN320404_c0_g1_i1	239.794	-3.23874	0.398887	-3.1055	0.00189957	0.0441426	XP_010934254.2	protein unc--13 homolog	LOC105054449	Elaeis guineensis var. tenera (Oil palm)	--	--	--	--	S	--	--
TRINITY_DN320853_c0_g1_i1	118.513	-7.12708	0.911174	-5.62689	1.83488e-08	2.36692e-06	XP_020243700.1	--	--	--	--	--	--	--	--	PEQU_28155	MYB
TRINITY_DN321557_c0_g1_i1	597.107	-4.33968	0.580092	-4.03329	5.50009e-05	0.00248676	XP_020250590.1	--	--	--	--	--	--	--	--	--	--
TRINITY_DN323178_c0_g1_i1	46.3854	-6.67744	1.34483	-3.47808	0.000505013	0.0150287	--	--	--	--	--	--	--	--	--	--	--
TRINITY_DN323312_c0_g1_i1	59.7091	-9.57066	1.94036	-3.90167	9.55307e-05	0.00396214	XP_020269269.1	--	--	--	--	--	--	--	--	MDP0000320566	NAC
TRINITY_DN3235_c1_g1_i2	60381	-4.32619	0.526179	-4.42092	9.8282e-06	0.000577343	XP_020274748.1	--	--	--	--	--	--	--	--	--	--
TRINITY_DN3241_c8_g1_i4	120.561	-6.29348	1.00967	-4.25236	2.1153e-05	0.00107825	--	--	--	--	--	--	--	--	--	--	--
TRINITY_DN324303_c0_g1_i1	2484.74	-3.82033	0.272369	-6.68331	2.33603e-11	5.46874e-09	XP_020243386.1	--	--	--	--	--	--	--	--	--	--
TRINITY_DN324838_c0_g1_i1	43.0509	-9.09818	1.88483	-3.76595	0.000165916	0.00619914	--	--	--	--	--	--	--	--	--	--	--
TRINITY_DN326091_c0_g1_i1	237.107	-4.55231	0.722434	-3.53293	0.000410984	0.0127842	XP_020265475.1	--	--	--	--	--	--	--	--	--	--
TRINITY_DN32642_c0_g2_i3	20.4969	-8.03139	1.94373	-3.103	0.00191567	0.044484	--	--	--	--	--	--	--	--	--	--	--
TRINITY_DN328087_c0_g1_i1	1136.94	-5.18995	0.6691	-4.76753	1.86502e-06	0.000142372	XP_028549114.1	--	--	--	--	--	--	--	--	--	--
TRINITY_DN330841_c0_g1_i1	561.209	-7.42644	0.601774	-9.01741	1.92597255094424E--019	1.69078990277893E--016	XP_020255205.1	--	--	--	--	--	--	--	--	Rsa1.0_03425.1_g00001.1	ZF--HD
TRINITY_DN331292_c0_g1_i1	111.635	-5.54147	0.933858	-3.79231	0.000149255	0.00568321	XP_010917250.1	AAA--ATPase At4g30250--like	LOC105041886	Elaeis guineensis var. tenera (Oil palm)	ATPase activity [GO:0016887]; ATP binding [GO:0005524]	--	--	--	--	Zmw_sc02343.1.g00060.1	NAC
TRINITY_DN331451_c0_g1_i1	102.55	-23.0761	4.78536	-4.40429	1.0613e-05	0.000613184	QBH74302.1	--	--	--	--	--	--	--	--	Peinf101Scf01093g11002.1	bHLH
TRINITY_DN33381_c0_g1_i2	1719.4	-4.81647	0.393799	-7.15206	8.54872e-13	2.50326e-10	--	--	--	--	--	--	--	--	--	--	--
TRINITY_DN33381_c0_g2_i2	117.752	-5.41211	0.661475	-5.15834	2.49155e-07	2.42286e-05	--	--	--	--	--	--	--	--	--	--	--
TRINITY_DN33392_c0_g1_i16	6981.58	-4.09879	0.576574	-3.6401	0.000272531	0.00916284	XP_020083942.1	thylakoid lumenal 29 kDa protein, chloroplastic	LOC109707219	Ananas comosus (Pineapple) (Ananas ananas)	heme binding [GO:0020037]; peroxidase activity [GO:0004601]	--	response to oxidative stress [GO:0006979]	--	--	--	--
TRINITY_DN33701_c0_g2_i10	32.0938	-8.67516	1.8197	-3.66827	0.000244199	0.00836888	--	--	--	--	--	--	--	--	--	--	--
TRINITY_DN33813_c0_g1_i1	82.9449	-7.67071	1.24396	-4.55858	5.15007e-06	0.000342658	--	--	--	--	--	--	--	--	--	--	--
TRINITY_DN338415_c0_g1_i1	24.46	-8.28566	1.86768	-3.36549	0.000764085	0.021121	--	--	--	--	--	--	--	--	--	--	--
TRINITY_DN34018_c0_g1_i1	80.7889	-7.64577	1.32705	-4.25438	2.09626e-05	0.00107375	XP_009410868.1	--	--	--	--	--	--	--	--	Tp57577_TGAC_v2_mRNA33215	bHLH
TRINITY_DN34200_c0_g1_i1	26.226	-8.38662	1.84333	-3.46471	0.000530797	0.0156925	XP_010936249.1	Protein DETOXIFICATION (Multidrug and toxic compound extrusion protein)	LOC105055918	Elaeis guineensis var. tenera (Oil palm)	antiporter activity [GO:0015297]; xenobiotic transmembrane transporter activity [GO:0042910]	integral component of membrane [GO:0016021]	--	--	--	MDP0000242456	B3
TRINITY_DN3488_c0_g5_i1	26.3229	-8.38812	1.96513	-3.25073	0.00115109	0.0295048	--	--	--	--	--	--	--	--	--	--	--
TRINITY_DN3507_c0_g1_i13	20012.3	-7.26348	0.622896	-8.45002	2.91252957393161E--017	1.91766e-14	XP_017429474.1	Germin--like protein	LR48_Vigan07g139000	Phaseolus angularis (Azuki bean) (Vigna angularis)	manganese ion binding [GO:0030145]	apoplast [GO:0048046]; cell wall [GO:0005618]	--	--	--	678365117	bZIP
TRINITY_DN35315_c0_g1_i2	43.4822	-9.11291	1.78314	-3.98898	6.63572e-05	0.00288864	--	--	--	--	--	--	--	--	--	--	--
TRINITY_DN35529_c0_g1_i1	131.023	-4.96806	0.771679	-3.84624	0.000119945	0.00472074	--	--	--	--	--	--	--	--	--	--	--
TRINITY_DN35924_c0_g1_i5	112.623	-3.96861	0.597403	-3.29528	0.000983253	0.0260475	XP_020673850.1	--	--	--	--	--	--	--	--	PDK_30s6550963g005	MYB
TRINITY_DN36035_c1_g1_i4	80982.4	-3.21899	0.279783	-4.35693	1.31898e-05	0.00073779	KAA8523521.1	Fructose--bisphosphate aldolase (EC 4.1.2.13)	F0562_009944	Nyssa sinensis	fructose--bisphosphate aldolase activity [GO:0004332]	--	glycolytic process [GO:0006096]	PATHWAY: Carbohydrate degradation. {ECO:0000256|ARBA:ARBA00004921}.; PATHWAY: Carbohydrate degradation; glycolysis; D--glyceraldehyde 3--phosphate and glycerone phosphate from D--glucose: step 4/4. {ECO:0000256|ARBA:ARBA00004714}.	--	Csa06g039080.1	ERF
TRINITY_DN3621_c0_g1_i1	2456.53	-3.79439	0.479393	-3.74305	0.000181798	0.00665766	XP_020244353.1	--	--	--	--	--	--	--	--	Jcr4S00282.90	NAC
TRINITY_DN36315_c0_g2_i3	58.5818	-7.19523	1.43055	-3.63163	0.00028164	0.00937951	--	--	--	--	--	--	--	--	--	--	--
TRINITY_DN36392_c0_g1_i7	317.171	-4.55559	0.648328	-3.94182	8.0865e-05	0.00344893	XP_020250721.1	--	--	--	--	--	--	--	G	Thecc1EG029045t1	C2H2
TRINITY_DN36405_c0_g1_i7	71.1907	-5.54307	1.1037	-3.21018	0.00132654	0.0334322	--	--	--	--	--	--	--	--	--	--	--
TRINITY_DN36543_c0_g1_i4	45480	-2.8988	0.236592	-3.79892	0.000145326	0.00554668	XP_020243468.1	--	--	--	--	--	--	--	--	--	--
TRINITY_DN3669_c2_g2_i1	287.644	-11.8405	1.72574	-5.70219	1.1828e-08	1.61125e-06	--	--	--	--	--	--	--	--	--	--	--
TRINITY_DN36704_c0_g1_i2	44.7057	-9.15268	1.84144	-3.88429	0.00010263	0.00419061	--	--	--	--	--	--	--	--	--	--	--
TRINITY_DN36903_c0_g1_i1	664.751	-7.86494	0.986095	-5.94764	2.72038e-09	4.15337e-07	OVA13172.1	Transcription factor GRAS	BVC80_8917g37	Macleaya cordata	--	--	--	--	K	GSMUA_Achr6P24300_001	GRAS
TRINITY_DN369626_c0_g1_i1	543.164	-12.7579	1.50419	-7.15197	8.55436e-13	2.50326e-10	--	--	--	--	--	--	--	--	--	--	--
TRINITY_DN370156_c1_g1_i1	15274.5	-4.29319	0.58385	-3.92771	8.57587e-05	0.00362827	ABA46900.1	Ribulose bisphosphate carboxylase small subunit (RuBisCO small subunit)	rbcS--Ma3	Musa acuminata (Banana) (Musa cavendishii)	monooxygenase activity [GO:0004497]; ribulose--bisphosphate carboxylase activity [GO:0016984]	chloroplast [GO:0009507]	photorespiration [GO:0009853]; reductive pentose--phosphate cycle [GO:0019253]	--	--	--	--
TRINITY_DN370156_c2_g1_i1	6721.09	-3.91989	0.569174	-3.37312	0.000743205	0.0206068	WP_108967763.1	--	--	--	--	--	--	--	--	--	--
TRINITY_DN3703_c0_g1_i9	311.748	-8.58008	0.856918	-7.67877	1.6062e-14	6.26694e-12	--	--	--	--	--	--	--	--	--	--	--
TRINITY_DN37369_c0_g1_i1	159.487	-7.40432	1.15104	-4.69516	2.66403e-06	0.000192223	AQP25675.1	MYB transcription factor	MYB29	Allium cepa (Onion)	--	--	--	--	ADK	XP_010938309.1	MYB
TRINITY_DN374120_c0_g1_i1	150.056	-4.44872	0.594119	-4.12159	3.76268e-05	0.00179903	--	--	--	--	--	--	--	--	--	--	--
TRINITY_DN376137_c0_g1_i1	153.931	-8.47595	1.14951	-5.63368	1.76401e-08	2.30371e-06	--	--	--	--	--	--	--	--	--	--	--
TRINITY_DN37653_c0_g1_i1	639.278	-5.30435	0.542604	-6.0898	1.1305e-09	1.9631e-07	ONK80625.1	Uncharacterized protein	A4U43_C01F19920	Asparagus officinalis (Garden asparagus)	ATPase--coupled transmembrane transporter activity [GO:0042626]; ATP binding [GO:0005524]	integral component of membrane [GO:0016021]	--	--	--	Rsa1.0_03996.1_g00001.1	MYB_related
TRINITY_DN376981_c0_g1_i1	7124.37	-4.65659	0.521105	-5.09799	3.43285e-07	3.22893e-05	RYR29363.1	AAI domain--containing protein	Ahy_B01g053760	Arachis hypogaea (Peanut)	--	--	--	--	--	C.cajan_40518	Trihelix
TRINITY_DN377555_c0_g1_i1	1111.9	-4.20282	0.452752	-4.86541	1.14222e-06	9.3763e-05	XP_020243866.1	--	--	--	--	--	--	--	--	676787872	E2F/DP
TRINITY_DN377761_c0_g1_i1	944.085	-6.23487	0.75442	-5.61341	1.98375e-08	2.49779e-06	AIY34667.1	4--coumarate:CoA ligase--like protein	4CL6	Albuca bracteata (False sea onion) (Ornithogalum longebracteatum)	ligase activity [GO:0016874]	--	--	--	--	Spipo12G0053800	C2H2
TRINITY_DN378700_c0_g1_i1	89.5636	-10.1561	1.87251	-4.35574	1.32619e-05	0.000740513	XP_008796967.1	--	--	--	--	--	--	--	--	--	--
TRINITY_DN379771_c0_g1_i1	578.803	-5.99784	0.573565	-6.97017	3.16556e-12	8.62451e-10	--	--	--	--	--	--	--	--	--	--	--
TRINITY_DN38041_c0_g1_i2	93.8333	-10.2232	1.71992	-4.78114	1.74303e-06	0.000135348	XP_020267712.1	--	--	--	--	--	--	--	--	PEQU_04715	ERF
TRINITY_DN3812_c0_g4_i1	413.928	-4.5234	0.614791	-4.10449	4.05208e-05	0.00192574	--	--	--	--	--	--	--	--	CG	--	--
TRINITY_DN381529_c0_g1_i1	191.444	-5.94246	1.10831	-3.55718	0.000374864	0.0118472	--	--	--	--	--	--	--	--	--	--	--
TRINITY_DN3816_c3_g2_i1	48.9413	-5.10844	0.986733	-3.15024	0.00163137	0.0393871	XP_010937673.1	ADP--ribosylation factor GTPase--activating protein AGD7	LOC105056969	Elaeis guineensis var. tenera (Oil palm)	GTPase activator activity [GO:0005096]	--	positive regulation of GTPase activity [GO:0043547]; vesicle--mediated transport [GO:0016192]	--	--	--	--
TRINITY_DN381857_c0_g1_i1	169.837	-7.7514	1.09232	-5.26533	1.39941e-07	1.4313e-05	XP_008803247.1	--	--	--	--	--	--	--	--	CCG025416.1	G2--like
TRINITY_DN382003_c0_g1_i1	59.4844	-6.24413	1.19562	-3.54974	0.000385613	0.0121263	ACY92095.1	Photosystem I subunit H	PsaH	Lycoris radiata (Hurricane lily) (Red spiderlily)	--	chloroplast thylakoid membrane [GO:0009535]; integral component of membrane [GO:0016021]; photosystem I reaction center [GO:0009538]	photosynthesis [GO:0015979]	--	--	--	--
TRINITY_DN383616_c0_g1_i1	79.6651	-9.9888	1.59509	-5.00837	5.48926e-07	4.90064e-05	--	--	--	--	--	--	--	--	--	--	--
TRINITY_DN384176_c0_g1_i1	519.868	-5.51474	0.532236	-6.60374	4.00916e-11	8.92293e-09	XP_020268427.1	--	--	--	--	--	--	--	--	--	--
TRINITY_DN384985_c0_g1_i1	113.482	-10.4977	1.66176	-5.11367	3.15965e-07	2.99873e-05	--	--	--	--	--	--	--	--	--	--	--
TRINITY_DN38515_c1_g1_i4	120.543	-5.46016	0.808445	-4.28001	1.86881e-05	0.000982726	--	--	--	--	--	--	--	--	--	--	--
TRINITY_DN38656_c1_g1_i1	891.097	-5.68768	0.834032	-4.42152	9.80106e-06	0.000576821	XP_020247068.1	--	--	--	--	--	--	--	M	--	--
TRINITY_DN38722_c0_g1_i1	145.778	-6.68992	0.85587	-5.47972	4.26002e-08	5.00497e-06	CDY48341.1	BnaA09g26800D protein	BnaA09g26800D GSBRNA2T00089313001	Brassica napus (Rape)	--	--	response to auxin [GO:0009733]	--	--	--	--
TRINITY_DN38991_c3_g1_i1	151.391	-6.45782	1.39468	-3.19631	0.00139199	0.0346126	--	--	--	--	--	--	--	--	--	--	--
TRINITY_DN39171_c0_g1_i2	622.804	-12.9554	1.65185	-6.6322	3.30713e-11	7.41267e-09	XP_020265795.1	--	--	--	--	--	--	--	--	Aco017242.1	Trihelix
TRINITY_DN3952_c0_g1_i3	282.171	-7.69003	0.880668	-6.46103	1.0399e-10	2.16216e-08	XP_020275130.1	--	--	--	--	--	--	--	--	--	--
TRINITY_DN3952_c0_g2_i1	316.264	-6.28804	0.758868	-5.65058	1.59908e-08	2.11454e-06	XP_020272255.1	--	--	--	--	--	--	--	--	--	--
TRINITY_DN398_c0_g3_i1	9032.45	-4.82223	0.489086	-5.77042	7.90755e-09	1.13082e-06	ONK80128.1	TPT domain--containing protein	A4U43_C01F14170	Asparagus officinalis (Garden asparagus)	transmembrane transporter activity [GO:0022857]	chloroplast membrane [GO:0031969]; integral component of membrane [GO:0016021]	--	--	--	KZV22500.1	HB--other
TRINITY_DN40128_c0_g1_i2	46.5145	-9.21394	1.69112	-4.26579	1.99199e-05	0.00103205	--	--	--	--	--	--	--	--	--	--	--
TRINITY_DN4015_c0_g2_i1	214.486	-5.3078	0.665698	-4.96892	6.73256e-07	5.87778e-05	XP_010928493.1	serine/threonine--protein kinase UCN	LOC105050241	Elaeis guineensis var. tenera (Oil palm)	ATP binding [GO:0005524]; protein serine/threonine kinase activity [GO:0004674]	--	--	--	T	Gh_D11G0701	NAC
TRINITY_DN4059_c0_g1_i6	144.157	-7.48745	0.954522	-5.7489	8.98258e-09	1.2506e-06	--	--	--	--	--	--	--	--	--	--	--
TRINITY_DN40738_c0_g2_i1	53.9087	-7.92822	1.89259	-3.13233	0.00173425	0.0413032	--	--	--	--	--	--	--	--	--	--	--
TRINITY_DN4118_c0_g1_i1	517.717	-4.68212	0.856557	-3.13128	0.00174045	0.0414196	XP_020256575.1	--	--	--	--	--	--	--	--	Cotton_A_39858_BGI--A2_v1.0	ERF
TRINITY_DN4122_c0_g2_i4	1252.57	-3.75485	0.513261	-3.41901	0.000628485	0.0180405	XP_020247293.1	--	--	--	--	--	--	--	--	Jcr4S00282.90	NAC
TRINITY_DN4122_c0_g3_i2	2841.12	-3.87307	0.576363	-3.2498	0.00115485	0.0295769	XP_020247293.1	--	--	--	--	--	--	--	--	Jcr4S00282.90	NAC
TRINITY_DN4138_c0_g2_i1	290.168	-3.70269	0.480057	-3.54686	0.000389859	0.0122143	XP_010919644.3	LOW QUALITY PROTEIN: ethylene--responsive transcription factor ERF038	LOC105043684	Elaeis guineensis var. tenera (Oil palm)	DNA binding [GO:0003677]; DNA--binding transcription factor activity [GO:0003700]	nucleus [GO:0005634]	--	--	--	XP_010919644.1	ERF
TRINITY_DN4171_c0_g1_i1	1276.88	-5.07372	0.634939	-4.84097	1.29206e-06	0.000104403	XP_010928822.1	Glycosyltransferase family 92 protein (EC 2.4.1.--)	LOC105050478	Elaeis guineensis var. tenera (Oil palm)	transferase activity, transferring glycosyl groups [GO:0016757]	membrane [GO:0016020]	--	--	--	--	--
TRINITY_DN418_c1_g1_i21	4977.69	-4.12035	0.40691	-5.21085	1.87979e-07	1.86235e-05	RRT42590.1	PMEI domain--containing protein	B296_00040111	Ensete ventricosum (Abyssinian banana) (Musa ensete)	enzyme inhibitor activity [GO:0004857]	--	--	--	--	--	--
TRINITY_DN4182_c0_g2_i2	5367.78	-3.02716	0.254959	-4.02872	5.60812e-05	0.0025176	--	--	--	--	--	--	--	--	S	--	--
TRINITY_DN41852_c1_g3_i1	13808.3	-5.2129	0.741609	-4.33234	1.47536e-05	0.000805306	XP_010926041.1	Ribulose bisphosphate carboxylase small subunit (RuBisCO small subunit)	LOC105048437	Elaeis guineensis var. tenera (Oil palm)	monooxygenase activity [GO:0004497]; ribulose--bisphosphate carboxylase activity [GO:0016984]	chloroplast [GO:0009507]	photorespiration [GO:0009853]; reductive pentose--phosphate cycle [GO:0019253]	--	--	--	--
TRINITY_DN420386_c0_g2_i1	31721.2	-4.01003	0.537291	-3.74105	0.000183252	0.00667993	ABA46885.1	Ribulose bisphosphate carboxylase small subunit (RuBisCO small subunit) (Fragment)	rbcS--Ma5	Musa AAAB Group	monooxygenase activity [GO:0004497]; ribulose--bisphosphate carboxylase activity [GO:0016984]	chloroplast [GO:0009507]	photorespiration [GO:0009853]; reductive pentose--phosphate cycle [GO:0019253]	--	--	mrna16933.1--v1.0--hybrid	M--type_MADS
TRINITY_DN420561_c0_g1_i1	25665.3	-4.29865	0.528811	-4.34682	1.38126e-05	0.000763306	XP_020255448.1	--	--	--	--	--	--	--	P	--	--
TRINITY_DN420561_c1_g1_i1	84214.7	-4.3534	0.565127	-4.16437	3.12215e-05	0.00152038	XP_020255397.1	--	--	--	--	--	--	--	--	--	--
TRINITY_DN420576_c1_g1_i1	528.348	-5.00567	0.499015	-6.0232	1.71006e-09	2.80025e-07	XP_020255448.1	--	--	--	--	--	--	--	--	--	--
TRINITY_DN420576_c3_g1_i1	13808.6	-4.32335	0.56852	-4.08667	4.37608e-05	0.002055	--	--	--	--	--	--	--	--	--	--	--
TRINITY_DN421959_c0_g1_i1	281.127	-5.58752	0.738108	-4.86043	1.1713e-06	9.56535e-05	AQP25675.1	MYB transcription factor	MYB29	Allium cepa (Onion)	--	--	--	--	--	XP_010921536.1	MYB
TRINITY_DN422478_c0_g1_i1	70.291	-9.80624	1.89672	-4.11565	3.86082e-05	0.00184038	THU67897.1	Uncharacterized protein	C4D60_Mb05t29550	Musa balbisiana (Banana)	copper ion binding [GO:0005507]; oxidoreductase activity [GO:0016491]	--	--	--	--	--	--
TRINITY_DN423976_c0_g1_i2	160.604	-23.7023	4.78513	-4.53536	5.75055e-06	0.000371658	XP_026276962.1	--	--	--	--	--	--	--	--	--	--
TRINITY_DN424207_c0_g1_i1	5351.03	-3.71319	0.476172	-3.59783	0.000320879	0.0103798	ACG39696.1	Fasciclin domain	--	Zea mays (Maize)	--	--	--	--	--	--	--
TRINITY_DN424422_c0_g1_i1	38.2534	-8.92757	1.96297	-3.52913	0.00041693	0.0128804	--	--	--	--	--	--	--	--	--	--	--
TRINITY_DN4255_c0_g1_i9	213.038	-5.60078	0.742725	-4.84806	1.24672e-06	0.000101289	--	--	--	--	--	--	--	--	--	--	--
TRINITY_DN4255_c1_g1_i1	179.826	-11.1625	1.5535	-5.89796	3.68024e-09	5.48634e-07	XP_019074372.1	Auxin--responsive protein SAUR66	SAUR66_17 CK203_010472	Vitis vinifera (Grape)	--	--	response to auxin [GO:0009733]	--	--	--	--
TRINITY_DN4268_c0_g1_i2	9574.47	-3.51823	0.45365	-3.3467	0.000817795	0.0223385	RWR76463.1	30S ribosomal protein S21, chloroplastic	CKAN_00490500	Cinnamomum micranthum f. kanehirae	structural constituent of ribosome [GO:0003735]	ribosome [GO:0005840]	translation [GO:0006412]	--	--	--	--
TRINITY_DN4282_c2_g1_i1	877.426	-5.89386	1.06715	-3.64884	0.000263424	0.00891242	CAA06961.1	Chlorophyll a--b binding protein, chloroplastic (Fragment)	CP29	Hordeum vulgare (Barley)	chlorophyll binding [GO:0016168]	chloroplast thylakoid membrane [GO:0009535]; photosystem I [GO:0009522]; photosystem II [GO:0009523]	photosynthesis, light harvesting [GO:0009765]; protein--chromophore linkage [GO:0018298]	--	--	--	--
TRINITY_DN430031_c1_g1_i1	10633.3	-4.18734	0.593786	-3.68372	0.000229855	0.00797402	ABA46900.1	Ribulose bisphosphate carboxylase small subunit (RuBisCO small subunit)	rbcS--Ma3	Musa acuminata (Banana) (Musa cavendishii)	monooxygenase activity [GO:0004497]; ribulose--bisphosphate carboxylase activity [GO:0016984]	chloroplast [GO:0009507]	photorespiration [GO:0009853]; reductive pentose--phosphate cycle [GO:0019253]	--	--	--	--
TRINITY_DN4320_c0_g1_i1	814.47	-4.06421	0.304739	-6.77369	1.25541e-11	3.12409e-09	XP_020260349.1	--	--	--	--	--	--	--	--	Vradi02g06710.1	ERF
TRINITY_DN433240_c0_g1_i1	30.5084	-8.60107	1.93061	-3.41915	0.000628161	0.0180405	--	--	--	--	--	--	--	--	--	--	--
TRINITY_DN434_c0_g1_i2	3387.31	-4.00128	0.573418	-3.49009	0.000482851	0.0144645	THU49699.1	3--ketoacyl--CoA synthase (EC 2.3.1.--)	C4D60_Mb06t12310	Musa balbisiana (Banana)	transferase activity, transferring acyl groups other than amino--acyl groups [GO:0016747]	integral component of membrane [GO:0016021]	fatty acid biosynthetic process [GO:0006633]	PATHWAY: Lipid metabolism; fatty acid biosynthesis. {ECO:0000256|PIRNR:PIRNR036417}.	--	--	--
TRINITY_DN434_c0_g2_i1	1172.01	-3.87867	0.500909	-3.75053	0.000176463	0.00652272	BAS82628.1	Os03g0181500 protein (Fragment)	Os03g0181500 OSNPB_030181500	Oryza sativa subsp. japonica (Rice)	transferase activity, transferring acyl groups other than amino--acyl groups [GO:0016747]	membrane [GO:0016020]	fatty acid biosynthetic process [GO:0006633]	--	--	--	--
TRINITY_DN434_c1_g1_i2	2687.79	-6.72138	0.639568	-7.38214	1.55761e-13	5.35073e-11	XP_020269425.1	--	--	--	--	--	--	--	--	--	--
TRINITY_DN434_c2_g1_i1	175.87	-4.26126	0.47649	-4.74565	2.07839e-06	0.000156394	XP_020241519.1	--	--	--	--	--	--	--	--	--	--
TRINITY_DN434_c3_g1_i3	3568.52	-6.32262	0.548932	-7.8746	3.41828270011424E--015	1.54331e-12	THU57286.1	3--ketoacyl--CoA synthase (EC 2.3.1.--)	C4D60_Mb03t01920	Musa balbisiana (Banana)	transferase activity, transferring acyl groups other than amino--acyl groups [GO:0016747]	integral component of membrane [GO:0016021]	fatty acid biosynthetic process [GO:0006633]	PATHWAY: Lipid metabolism; fatty acid biosynthesis. {ECO:0000256|PIRNR:PIRNR036417}.	--	--	--
TRINITY_DN4360_c0_g1_i7	436407	-5.50332	0.640318	-5.47121	4.46965e-08	5.19334e-06	ABA46900.1	Ribulose bisphosphate carboxylase small subunit (RuBisCO small subunit)	rbcS--Ma3	Musa acuminata (Banana) (Musa cavendishii)	monooxygenase activity [GO:0004497]; ribulose--bisphosphate carboxylase activity [GO:0016984]	chloroplast [GO:0009507]	photorespiration [GO:0009853]; reductive pentose--phosphate cycle [GO:0019253]	--	--	mrna16933.1--v1.0--hybrid	M--type_MADS
TRINITY_DN436007_c0_g1_i1	442.632	-12.463	2.55411	-4.09656	4.19339e-05	0.00197803	XP_020268196.1	--	--	--	--	--	--	--	--	FANhyb_rscf00000253.1.g00010.1	BBR--BPC
TRINITY_DN4375_c0_g2_i1	1495.93	-3.40933	0.401705	-3.50838	0.000450849	0.0136766	XP_010910383.1	Xyloglucan endotransglucosylase/hydrolase (EC 2.4.1.207)	LOC105036312	Elaeis guineensis var. tenera (Oil palm)	hydrolase activity, hydrolyzing O--glycosyl compounds [GO:0004553]; xyloglucan:xyloglucosyl transferase activity [GO:0016762]	apoplast [GO:0048046]; cell wall [GO:0005618]	cell wall biogenesis [GO:0042546]; cell wall organization [GO:0071555]; xyloglucan metabolic process [GO:0010411]	--	--	Lus10007348	MYB_related
TRINITY_DN43779_c0_g1_i3	48808.5	-3.18201	0.255077	-4.63392	3.58803e-06	0.000250323	XP_020253092.1	--	--	--	--	--	--	--	--	MDP0000319772	MYB_related
TRINITY_DN442112_c0_g1_i2	39.0883	-8.95956	1.77325	-3.92475	8.68184e-05	0.00366145	--	--	--	--	--	--	--	--	--	--	--
TRINITY_DN4426_c0_g1_i10	810.476	-5.74865	0.374509	-10.0095	1.3843732825979E--023	1.98871514651019E--020	XP_020254780.1	--	--	--	--	--	--	--	--	--	--
TRINITY_DN4442_c0_g4_i1	30.3143	-8.59532	1.79371	-3.67691	0.000236074	0.00814507	--	--	--	--	--	--	--	--	--	--	--
TRINITY_DN445708_c0_g1_i1	48.6242	-5.95986	1.26243	-3.1367	0.00170864	0.040847	--	--	--	--	--	--	--	--	--	--	--
TRINITY_DN44593_c0_g1_i8	45.4462	-6.11037	1.15292	-3.56517	0.000363618	0.0115911	--	--	--	--	--	--	--	--	--	Rsa1.0_01894.1_g00003.1	WRKY
TRINITY_DN4479_c0_g8_i1	64.1412	-6.22605	0.983868	-4.29534	1.74429e-05	0.000932766	--	--	--	--	--	--	--	--	--	--	--
TRINITY_DN4484_c0_g3_i1	4552.95	-3.41177	0.417035	-3.38525	0.000711145	0.0198894	XP_003611973.1	Plant/T3A5--60 protein	11408047 MTR_5g019920	Medicago truncatula (Barrel medic) (Medicago tribuloides)	--	integral component of membrane [GO:0016021]	--	--	--	--	--
TRINITY_DN44934_c3_g1_i1	25.0021	-8.3157	1.87482	-3.36869	0.000755255	0.0209011	--	--	--	--	--	--	--	--	--	--	--
TRINITY_DN4499_c0_g1_i1	891.352	-5.85318	0.756213	-5.09537	3.48068e-07	3.2642e-05	XP_021910510.1	--	--	--	--	--	--	--	--	676732396	bHLH
TRINITY_DN4499_c0_g2_i2	500.868	-7.14471	0.983955	-5.2286	1.70798e-07	1.71362e-05	PNX87177.1	Expansin (Fragment)	expansin L195_g043263	Trifolium pratense (Red clover)	--	cell wall [GO:0005618]; extracellular region [GO:0005576]; membrane [GO:0016020]	plant--type cell wall organization [GO:0009664]	--	--	676732396	bHLH
TRINITY_DN4523_c0_g1_i1	2129.56	-3.99668	0.528	-3.78159	0.00015583	0.00589804	XP_020268981.1	--	--	--	--	--	--	--	--	--	--
TRINITY_DN45279_c1_g1_i1	79.9421	-9.99189	1.69292	-4.72078	2.34943e-06	0.000172277	--	--	--	--	--	--	--	--	--	--	--
TRINITY_DN45568_c0_g1_i8	303.114	-5.51125	0.735846	-4.77172	1.82661e-06	0.000140458	--	--	--	--	--	--	--	--	--	--	--
TRINITY_DN4586_c0_g1_i8	52.909	-7.94009	1.57411	-3.77361	0.000160899	0.00606087	--	--	--	--	--	--	--	--	--	--	--
TRINITY_DN4599_c0_g4_i3	209.542	-11.3833	1.53937	-6.09555	1.09059e-09	1.91484e-07	--	--	--	--	--	--	--	--	--	--	--
TRINITY_DN4608_c0_g1_i1	10753.2	-4.88777	0.503322	-5.73742	9.61293e-09	1.33249e-06	XP_021627436.1	--	--	--	--	--	--	--	--	--	--
TRINITY_DN46098_c0_g1_i1	133.895	-10.7365	1.60697	-5.43667	5.42852e-08	6.10545e-06	XP_020254780.1	--	--	--	--	--	--	--	--	--	--
TRINITY_DN46567_c0_g1_i1	104.336	-4.10902	0.642191	-3.28409	0.00102311	0.0268931	XP_010913579.2	Glycosyltransferase (EC 2.4.1.--)	LOC105039202	Elaeis guineensis var. tenera (Oil palm)	UDP--glycosyltransferase activity [GO:0008194]	--	--	--	--	--	--
TRINITY_DN469176_c0_g1_i1	130.013	-23.4059	4.78522	-4.47334	7.70072e-06	0.000477347	XP_026294310.1	--	--	--	--	--	--	--	--	--	--
TRINITY_DN469247_c0_g1_i1	464.362	-4.24083	0.407636	-5.49714	3.85997e-08	4.5861e-06	--	--	--	--	--	--	--	--	--	LPERR07G02940.1	C2H2
TRINITY_DN470606_c0_g1_i1	47.9456	-9.25367	1.85067	-3.91948	8.87403e-05	0.0037245	--	--	--	--	--	--	--	--	--	mrna26188.1--v1.0--hybrid	NF--YB
TRINITY_DN471573_c0_g1_i1	40.6035	-9.01366	1.90504	-3.68163	0.000231748	0.00801332	QFU95051.1	BHLH transcription factor	B2	Allium cepa (Onion)	protein dimerization activity [GO:0046983]	--	--	--	K	XP_010906882.1	bHLH
TRINITY_DN4730_c0_g1_i6	195.89	-4.83394	0.629767	-4.49999	6.79568e-06	0.00042698	--	--	--	--	--	--	--	--	--	--	--
TRINITY_DN475592_c0_g1_i1	1187.77	-3.86558	0.518178	-3.60027	0.00031789	0.0103062	XP_020253495.1	--	--	--	--	--	--	--	--	--	--
TRINITY_DN475613_c0_g1_i1	24.4735	-8.2832	1.9627	-3.20131	0.00136805	0.0342114	XP_009419823.1	--	--	--	--	--	--	--	--	--	--
TRINITY_DN476060_c0_g1_i1	663.194	-6.35291	0.770671	-5.64821	1.62126e-08	2.13493e-06	XP_020706089.2	--	--	--	--	--	--	--	S	CCG019201.1	HSF
TRINITY_DN476612_c0_g1_i1	68.0129	-9.76261	1.64039	-4.73218	2.22122e-06	0.000164788	--	--	--	--	--	--	--	--	--	--	--
TRINITY_DN480479_c0_g1_i1	96.9881	-22.9999	4.78539	-4.38834	1.14218e-05	0.000652756	XP_026274685.1	--	--	--	--	--	--	--	--	Achn253811	bHLH
TRINITY_DN4808_c0_g1_i2	26.7547	-8.4173	1.87675	-3.41936	0.000627688	0.0180405	--	--	--	--	--	--	--	--	--	--	--
TRINITY_DN481562_c0_g1_i1	25.0021	-8.3157	1.87482	-3.36869	0.000755255	0.0209011	--	--	--	--	--	--	--	--	--	--	--
TRINITY_DN481908_c0_g1_i1	1017.16	-6.34342	0.593353	-7.32013	2.4774e-13	8.07173e-11	XP_020268366.1	--	--	--	--	--	--	--	--	PDK_30s856251g007	MYB_related
TRINITY_DN48304_c0_g1_i1	21741.7	-4.2867	0.572247	-3.996	6.4423e-05	0.00282389	ADC35579.1	Chlorophyll a--b binding protein, chloroplastic	--	Lycoris radiata (Hurricane lily) (Red spiderlily)	chlorophyll binding [GO:0016168]	chloroplast thylakoid membrane [GO:0009535]; photosystem I [GO:0009522]; photosystem II [GO:0009523]	photosynthesis, light harvesting [GO:0009765]; protein--chromophore linkage [GO:0018298]	--	--	Bradi3g42627.5.p	ERF
TRINITY_DN4842_c0_g1_i2	434.183	-5.59555	0.585694	-6.13897	8.30589e-10	1.49624e-07	XP_020257222.1	--	--	--	--	--	--	--	--	Lus10007348	MYB_related
TRINITY_DN487833_c0_g1_i1	28.6455	-8.51263	1.81649	-3.58529	0.000336706	0.0108363	--	--	--	--	--	--	--	--	--	--	--
TRINITY_DN48802_c0_g1_i1	747.743	-3.89089	0.297941	-6.34651	2.20255e-10	4.40566e-08	BAT13949.1	Os11g0460900 protein (Fragment)	Os11g0460900 OSNPB_110460900	Oryza sativa subsp. japonica (Rice)	--	integral component of membrane [GO:0016021]	--	--	--	--	--
TRINITY_DN489176_c0_g1_i1	67.5126	-9.75253	1.67923	-4.61671	3.89872e-06	0.000267859	--	--	--	--	--	--	--	--	--	--	--
TRINITY_DN4912_c0_g1_i23	192.722	-4.24015	0.508291	-4.40723	1.04703e-05	0.00060828	--	--	--	--	--	--	--	--	--	--	--
TRINITY_DN494103_c0_g1_i1	31.9133	-8.66831	1.7848	-3.73616	0.000186853	0.00677076	XP_020677478.1	--	--	--	--	--	--	--	--	--	--
TRINITY_DN494441_c0_g1_i1	25.7951	-8.36401	1.86886	-3.40528	0.000660956	0.0188358	XP_020266040.1	--	--	--	--	--	--	--	--	--	--
TRINITY_DN5_c1_g1_i3	1177.83	-4.90548	0.473324	-6.13846	8.33246e-10	1.49624e-07	XP_020275268.1	--	--	--	--	--	--	--	--	--	--
TRINITY_DN5024_c0_g1_i3	12064.9	-7.48923	0.529735	-10.3622	3.68331099510202E--025	6.12670319416865E--022	--	--	--	--	--	--	--	--	--	--	--
TRINITY_DN50661_c0_g1_i7	129.648	-6.90537	0.892715	-5.49488	3.90966e-08	4.62775e-06	--	--	--	--	--	--	--	--	--	--	--
TRINITY_DN50765_c0_g1_i1	83.0127	-6.70838	1.07335	-4.38663	1.15118e-05	0.000656713	--	--	--	--	--	--	--	--	--	--	--
TRINITY_DN51743_c0_g1_i2	56.5119	-9.4919	1.67645	-4.4689	7.86227e-06	0.000481549	--	--	--	--	--	--	--	--	--	--	--
TRINITY_DN5176_c0_g2_i1	30.0639	-8.58283	1.79706	-3.6631	0.000249177	0.00849512	RVW50499.1	Retrovirus--related Pol polyprotein from transposon RE2	RE2_1294 CK203_086864	Vitis vinifera (Grape)	--	--	--	--	--	Itr_sc000560.1_g00013.1	Nin--like
TRINITY_DN51787_c4_g1_i1	6967.02	-4.5264	0.53362	-4.73444	2.19657e-06	0.000163727	AAT08685.1	Chlorophyll a--b binding protein, chloroplastic (Fragment)	--	Hyacinthus orientalis (Common hyacinth)	chlorophyll binding [GO:0016168]	chloroplast thylakoid membrane [GO:0009535]; photosystem I [GO:0009522]; photosystem II [GO:0009523]	photosynthesis, light harvesting [GO:0009765]; protein--chromophore linkage [GO:0018298]	--	--	Bradi3g42627.5.p	ERF
TRINITY_DN5218_c0_g1_i1	1389.05	-3.46779	0.396766	-3.69939	0.000216119	0.00765045	--	--	--	--	--	--	--	--	--	--	--
TRINITY_DN52280_c0_g1_i2	61667.3	-3.80719	0.476807	-3.79018	0.000150538	0.00572515	XP_020255448.1	--	--	--	--	--	--	--	--	--	--
TRINITY_DN5255_c0_g1_i4	5250.18	-3.66959	0.414947	-4.02362	5.73109e-05	0.00256916	XP_010920552.1	uncharacterized protein At5g02240	LOC105044383	Elaeis guineensis var. tenera (Oil palm)	oxidoreductase activity [GO:0016491]	--	--	--	--	--	--
TRINITY_DN5263_c1_g1_i2	388.11	-4.08384	0.423062	-4.9256	8.41004e-07	7.10671e-05	--	--	--	--	--	--	--	--	--	--	--
TRINITY_DN5306_c3_g1_i1	71757.5	-4.66926	0.474991	-5.61961	1.91387e-08	2.4372e-06	OAY64661.1	Germin--like protein	ACMD2_20238	Ananas comosus (Pineapple) (Ananas ananas)	manganese ion binding [GO:0030145]	apoplast [GO:0048046]; cell wall [GO:0005618]	--	--	--	678365117	bZIP
TRINITY_DN5346_c0_g3_i2	105.911	-8.97755	1.50614	-4.63273	3.60881e-06	0.000250666	--	--	--	--	--	--	--	--	--	--	--
TRINITY_DN53949_c0_g1_i1	683.141	-6.62649	0.548444	-8.43568	3.292890136539E--017	2.09097e-14	--	--	--	--	--	--	--	--	--	--	--
TRINITY_DN54117_c0_g1_i1	37.6834	-8.90588	1.94488	-3.55079	0.00038407	0.0120898	XP_020248154.1	--	--	--	--	--	--	--	--	--	--
TRINITY_DN5453_c0_g1_i1	344.558	-9.74757	1.3437	-5.76586	8.12432e-09	1.15658e-06	XP_020270295.1	--	--	--	--	--	--	--	--	--	--
TRINITY_DN5453_c0_g2_i1	805.421	-13.3267	2.46175	-4.60108	4.20301e-06	0.000286894	XP_010932594.1	3--ketoacyl--CoA synthase (EC 2.3.1.--)	LOC105053207	Elaeis guineensis var. tenera (Oil palm)	transferase activity, transferring acyl groups other than amino--acyl groups [GO:0016747]	integral component of membrane [GO:0016021]	fatty acid biosynthetic process [GO:0006633]	PATHWAY: Lipid metabolism; fatty acid biosynthesis. {ECO:0000256|PIRNR:PIRNR036417}.	--	--	--
TRINITY_DN5473_c0_g1_i1	4929.18	-3.4129	0.352025	-4.01362	5.97942e-05	0.00266535	--	--	--	--	--	--	--	--	--	--	--
TRINITY_DN54969_c0_g1_i2	64.8326	-8.27912	1.74401	-3.60039	0.000317745	0.0103062	--	--	--	--	--	--	--	--	--	--	--
TRINITY_DN5497_c0_g1_i4	27932.2	-9.18191	0.687044	-10.4533	1.41452185058976E--025	2.48358603144661E--022	XP_020264638.1	--	--	--	--	--	--	--	C	Bradi3g42627.5.p	ERF
TRINITY_DN5497_c3_g1_i1	6497.46	-5.64906	0.633475	-5.76038	8.39225e-09	1.1825e-06	ADC35579.1	Chlorophyll a--b binding protein, chloroplastic	--	Lycoris radiata (Hurricane lily) (Red spiderlily)	chlorophyll binding [GO:0016168]	chloroplast thylakoid membrane [GO:0009535]; photosystem I [GO:0009522]; photosystem II [GO:0009523]	photosynthesis, light harvesting [GO:0009765]; protein--chromophore linkage [GO:0018298]	--	--	Bradi3g42627.5.p	ERF
TRINITY_DN5501_c0_g2_i2	779.232	-6.50517	0.507301	-8.88066	6.64654314469566E--019	5.25143373862404E--016	XP_020263644.1	--	--	--	--	--	--	--	--	--	--
TRINITY_DN5514_c0_g1_i1	1985.67	-9.49588	0.6724	-11.148	7.32739678547102E--029	1.92979206673355E--025	XP_020256136.1	--	--	--	--	--	--	--	--	CCG000365.1	NAC
TRINITY_DN5531_c0_g1_i12	353.305	-4.73935	0.808431	-3.38848	0.000702822	0.0196933	XP_020276866.1	--	--	--	--	--	--	--	--	--	--
TRINITY_DN5585_c2_g3_i1	66387.3	-4.19242	0.456906	-4.79842	1.59922e-06	0.000124586	XP_009771635.1	Plastocyanin	LOC104222137	Nicotiana sylvestris (Wood tobacco) (South American tobacco)	copper ion binding [GO:0005507]; electron transfer activity [GO:0009055]	chloroplast thylakoid membrane [GO:0009535]	--	--	--	--	--
TRINITY_DN5585_c2_g5_i2	66086.3	-4.20432	0.45927	-4.79961	1.58977e-06	0.000124364	XP_009771635.1	Plastocyanin	LOC104222137	Nicotiana sylvestris (Wood tobacco) (South American tobacco)	copper ion binding [GO:0005507]; electron transfer activity [GO:0009055]	chloroplast thylakoid membrane [GO:0009535]	--	--	--	--	--
TRINITY_DN56938_c0_g1_i4	81.5682	-10.0211	1.86513	-4.30055	1.70378e-05	0.000914199	--	--	--	--	--	--	--	--	--	--	--
TRINITY_DN5711_c0_g1_i1	1006.22	-11.0074	2.13858	-4.21187	2.53262e-05	0.0012585	XP_022132762.1	36.4 kDa proline--rich protein--like	LOC111005518	Momordica charantia (Bitter gourd) (Balsam pear)	--	--	--	--	--	--	--
TRINITY_DN5711_c0_g2_i9	1391.99	-10.8482	2.31571	-3.82096	0.000132931	0.00514846	--	--	--	--	--	--	--	--	--	--	--
TRINITY_DN5832_c0_g2_i1	521.813	-4.49738	0.687203	-3.63412	0.000278928	0.00932729	XP_020251371.1	--	--	--	--	--	--	--	--	Csa09g092790.1	BES1
TRINITY_DN5888_c0_g1_i1	2220.65	-7.24806	0.632851	-8.29273	1.1067978352335E--016	6.0309e-14	--	--	--	--	--	--	--	--	--	--	--
TRINITY_DN6003_c0_g1_i1	265.949	-8.4231	1.21714	-5.27722	1.31156e-07	1.35904e-05	ONK73899.1	BHLH domain--containing protein	A4U43_C03F730	Asparagus officinalis (Garden asparagus)	protein dimerization activity [GO:0046983]	--	regulation of growth [GO:0040008]; regulation of transcription, DNA--templated [GO:0006355]	--	--	XP_010939530.1	bHLH
TRINITY_DN6006_c0_g2_i2	826.707	-4.14326	0.35036	-6.1173	9.51764e-10	1.69941e-07	--	--	--	--	--	--	--	--	--	--	--
TRINITY_DN60388_c0_g1_i1	42.6478	-9.08481	1.80656	-3.92172	8.792e-05	0.0036999	--	--	--	--	--	--	--	--	--	--	--
TRINITY_DN6054_c3_g1_i22	128.039	-3.74258	0.524534	-3.32215	0.000893266	0.0239854	--	--	--	--	--	--	--	--	--	DCAR_006074	MYB_related
TRINITY_DN6077_c0_g1_i5	177150	-3.57581	0.420216	-3.74999	0.000176838	0.00652897	XP_010253858.1	Chlorophyll a--b binding protein, chloroplastic	LOC104595012	Nelumbo nucifera (Sacred lotus)	chlorophyll binding [GO:0016168]	chloroplast envelope [GO:0009941]; chloroplast thylakoid membrane [GO:0009535]; integral component of membrane [GO:0016021]; photosystem I [GO:0009522]; photosystem II [GO:0009523]; plastoglobule [GO:0010287]	photosynthesis, light harvesting in photosystem I [GO:0009768]; protein--chromophore linkage [GO:0018298]; response to light stimulus [GO:0009416]	--	C	Bradi3g42627.5.p	ERF
TRINITY_DN609_c0_g1_i2	1192.89	-9.55443	0.719762	-10.4957	9.03658266547104E--026	1.67995387387969E--022	--	--	--	--	--	--	--	--	--	XP_010940077.1	MYB_related
TRINITY_DN609_c0_g2_i1	2894.06	-11.7543	0.795086	-12.2682	1.34212768835938E--034	6.05951478041568E--031	XP_010940077.1	protein RADIALIS--like 3 isoform X1	LOC105058750	Elaeis guineensis var. tenera (Oil palm)	DNA--binding transcription factor activity [GO:0003700]	--	--	--	--	XP_010940077.1	MYB_related
TRINITY_DN6212_c0_g1_i2	9104.35	-3.60903	0.515171	-3.12329	0.00178844	0.0421175	XP_020273698.1	--	--	--	--	--	--	--	--	CCG030364.1	NF--YA
TRINITY_DN6330_c0_g2_i1	44.4686	-6.78341	1.33945	-3.57118	0.000355373	0.0113791	--	--	--	--	--	--	--	--	--	--	--
TRINITY_DN6433_c0_g2_i1	674.833	-3.4273	0.394725	-3.61594	0.000299264	0.00982897	XP_028070965.1	--	--	--	--	--	--	--	S	--	--
TRINITY_DN6456_c0_g1_i1	206.291	-3.80587	0.474761	-3.80373	0.000142531	0.00546006	--	--	--	--	--	--	--	--	--	--	--
TRINITY_DN6481_c0_g1_i1	2190.26	-3.91283	0.505385	-3.7849	0.000153771	0.00582709	XP_008811428.1	--	--	--	--	--	--	--	--	--	--
TRINITY_DN64839_c0_g1_i1	5379.01	-13.0729	0.913158	-12.1259	7.69666880420247E--034	3.04056901110019E--030	GAU10993.1	Uncharacterized protein (Fragment)	TSUD_112860	Trifolium subterraneum (Subterranean clover)	--	chloroplast thylakoid membrane [GO:0009535]; integral component of membrane [GO:0016021]; photosystem I reaction center [GO:0009538]	photosynthesis [GO:0015979]	--	--	--	--
TRINITY_DN6492_c0_g1_i19	898.708	-4.25576	0.498898	-4.52149	6.1406e-06	0.000392849	XP_010937497.1	Trehalose 6--phosphate phosphatase (EC 3.1.3.12)	LOC105056861	Elaeis guineensis var. tenera (Oil palm)	trehalose--phosphatase activity [GO:0004805]	--	trehalose biosynthetic process [GO:0005992]	PATHWAY: Glycan biosynthesis; trehalose biosynthesis. {ECO:0000256|ARBA:ARBA00005199, ECO:0000256|RuleBase:RU361117}.	G	--	--
TRINITY_DN66157_c0_g1_i1	353.192	-5.92937	0.915922	-4.29007	1.78615e-05	0.00095193	--	--	--	--	--	--	--	--	--	--	--
TRINITY_DN6630_c0_g3_i1	35.6109	-6.47151	1.40556	-3.18131	0.00146612	0.0361148	--	--	--	--	--	--	--	--	--	--	--
TRINITY_DN66925_c0_g1_i3	58.0817	-9.53149	2.27836	-3.30566	0.000947532	0.0252281	XP_026286642.1	--	--	--	--	--	--	--	--	--	--
TRINITY_DN6758_c0_g1_i1	10135.5	-6.97275	0.743587	-6.68751	2.27005e-11	5.35393e-09	XP_030441410.1	--	--	--	--	--	--	--	--	676732396	bHLH
TRINITY_DN6798_c0_g1_i5	10161.2	-7.90753	0.414655	-14.2469	4.68929476535831E--046	7.4100235882192E--042	XP_020269864.1	--	--	--	--	--	--	--	--	--	--
TRINITY_DN6808_c1_g2_i4	105.028	-10.3859	1.64938	-5.08429	3.69e-07	3.44008e-05	--	--	--	--	--	--	--	--	--	--	--
TRINITY_DN6816_c0_g1_i3	665.963	-4.8696	0.577578	-4.96834	6.753e-07	5.87939e-05	XP_020248933.1	--	--	--	--	--	--	--	--	--	--
TRINITY_DN682_c0_g1_i28	914.807	-5.86376	0.517411	-7.46748	8.17473e-14	3.00412e-11	XP_020267873.1	--	--	--	--	--	--	--	--	KFK41460.1	NAC
TRINITY_DN6836_c0_g4_i4	567.365	-7.67025	0.979106	-5.79125	6.98643e-09	1.01284e-06	--	--	--	--	--	--	--	--	--	--	--
TRINITY_DN6886_c0_g1_i14	1760.59	-3.44419	0.383096	-3.76978	0.000163392	0.00614533	XP_020270450.1	--	--	--	--	--	--	--	--	--	--
TRINITY_DN6940_c0_g2_i4	147518	-3.55074	0.384739	-4.03063	5.56266e-05	0.00250074	XP_023550942.1	--	--	--	--	--	--	--	--	--	--
TRINITY_DN6952_c0_g4_i1	616.011	-3.66656	0.354867	-4.69629	2.64933e-06	0.00019219	XP_020251470.1	--	--	--	--	--	--	--	--	Sme2.5_00580.1_g00006.1	CO--like
TRINITY_DN697_c0_g1_i1	775.439	-4.54315	0.584025	-4.35453	1.33355e-05	0.000743308	XP_010917686.1	Beta--galactosidase (EC 3.2.1.23)	LOC105042251	Elaeis guineensis var. tenera (Oil palm)	beta--galactosidase activity [GO:0004565]; carbohydrate binding [GO:0030246]	--	carbohydrate metabolic process [GO:0005975]	--	--	--	--
TRINITY_DN7052_c0_g1_i3	40123.2	-3.6931	0.528832	-3.20157	0.00136679	0.0342114	XP_022766664.1	Magnesium chelatase (EC 6.6.1.1)	LOC111311505	Durio zibethinus (Durian)	ATP binding [GO:0005524]; magnesium chelatase activity [GO:0016851]	--	chlorophyll biosynthetic process [GO:0015995]; photosynthesis [GO:0015979]	PATHWAY: Porphyrin--containing compound metabolism. {ECO:0000256|ARBA:ARBA00023444}.	--	--	--
TRINITY_DN70893_c0_g1_i1	71.095	-5.93154	1.06395	-3.69523	0.000219691	0.00773356	XP_020272248.1	--	--	--	--	--	--	--	--	--	--
TRINITY_DN7160_c0_g1_i4	2019.25	-4.92438	0.682467	-4.28502	1.82724e-05	0.000963289	XP_020275182.1	--	--	--	--	--	--	--	--	--	--
TRINITY_DN723_c0_g1_i16	89542.3	-3.69708	0.395837	-4.28731	1.80847e-05	0.000958967	XP_020255448.1	--	--	--	--	--	--	--	--	--	--
TRINITY_DN7345_c1_g1_i28	290.525	-4.27266	0.463238	-4.90604	9.29329e-07	7.8113e-05	ONK79752.1	Myosin motor domain--containing protein	A4U43_C01F9710	Asparagus officinalis (Garden asparagus)	actin filament binding [GO:0051015]; ATP binding [GO:0005524]; calmodulin binding [GO:0005516]; motor activity [GO:0003774]	myosin complex [GO:0016459]	--	--	Z	Mapoly0012s0190.1.p	C3H
TRINITY_DN7412_c0_g1_i3	621.057	-4.77649	0.687632	-4.03775	5.39664e-05	0.00246208	XP_020241435.1	--	--	--	--	--	--	--	--	--	--
TRINITY_DN7417_c0_g1_i1	128.237	-10.6751	1.55472	-5.57984	2.40738e-08	2.99539e-06	--	--	--	--	--	--	--	--	--	--	--
TRINITY_DN7448_c1_g1_i1	3360.41	-4.50762	0.642918	-3.90037	9.60475e-05	0.00397836	XP_008775859.1	--	--	--	--	--	--	--	O	--	--
TRINITY_DN7497_c1_g1_i5	7532.76	-4.4248	0.444614	-5.45372	4.93276e-08	5.62798e-06	--	--	--	--	--	--	--	--	--	--	--
TRINITY_DN750_c0_g1_i2	2561.73	-8.6138	0.664665	-9.95058	2.50716464134443E--023	3.14756168435304E--020	XP_017612873.1	Expansin	LOC108458115	Gossypium arboreum (Tree cotton) (Gossypium nanking)	--	cell wall [GO:0005618]; extracellular region [GO:0005576]; membrane [GO:0016020]	plant--type cell wall organization [GO:0009664]	--	--	676732396	bHLH
TRINITY_DN7515_c0_g2_i2	79704.8	-2.81809	0.267043	-3.06353	0.00218744	0.049628	XP_009406707.1	PSI--K (Photosystem I subunit X)	103989557	Musa acuminata subsp. malaccensis (Wild banana) (Musa malaccensis)	--	chloroplast thylakoid membrane [GO:0009535]; integral component of membrane [GO:0016021]; photosystem I [GO:0009522]	photosynthesis [GO:0015979]	--	--	--	--
TRINITY_DN7565_c0_g1_i1	251.992	-5.07974	0.83591	-3.6843	0.000229333	0.00797402	XP_020254990.1	--	--	--	--	--	--	--	--	KFK41460.1	NAC
TRINITY_DN7567_c0_g1_i1	171.373	-3.46378	0.449646	-3.2554	0.00113234	0.0292374	AEX55226.1	Putative cold--regulated protein	--	Allium sativum (Garlic)	--	integral component of membrane [GO:0016021]	--	--	--	--	--
TRINITY_DN77090_c0_g1_i2	634.777	-4.06214	0.366449	-5.62737	1.82983e-08	2.36692e-06	XP_029118917.1	--	--	--	--	--	--	--	--	--	--
TRINITY_DN77090_c1_g1_i1	3328.27	-4.65489	0.766805	-3.46227	0.000535631	0.0158059	XP_029118917.1	--	--	--	--	--	--	--	--	--	--
TRINITY_DN7719_c0_g1_i1	9325.5	-3.47775	0.383204	-3.8563	0.000115114	0.00457043	XP_020266579.1	--	--	--	--	--	--	--	--	--	--
TRINITY_DN7809_c0_g3_i2	46.0552	-9.19749	1.69278	-4.25187	2.11995e-05	0.00107889	--	--	--	--	--	--	--	--	--	--	--
TRINITY_DN7923_c0_g1_i9	2600.91	-3.56031	0.443185	-3.52068	0.000430448	0.0132462	XP_010927816.1	prolycopene isomerase, chloroplastic isoform X1	LOC105049770	Elaeis guineensis var. tenera (Oil palm)	isomerase activity [GO:0016853]; oxidoreductase activity [GO:0016491]	--	--	--	--	--	--
TRINITY_DN7963_c0_g1_i1	2668.19	-5.54406	0.995563	-3.55985	0.000371066	0.0117507	AYN25509.1	Alliinase (EC 4.4.1.4)	--	Allium macrostemon	alliin lyase activity [GO:0047654]	--	--	--	--	--	--
TRINITY_DN7973_c1_g1_i1	69.0808	-7.41591	1.30879	-4.13809	3.50202e-05	0.00169207	XP_020247001.1	--	--	--	--	--	--	--	S	Aco011192.1	C2H2
TRINITY_DN8027_c4_g1_i2	106.836	-10.4106	1.62698	-5.16948	2.34747e-07	2.30402e-05	--	--	--	--	--	--	--	--	--	--	--
TRINITY_DN8028_c2_g1_i1	89.1801	-5.36732	0.944615	-3.56476	0.000364193	0.0115911	--	--	--	--	--	--	--	--	--	--	--
TRINITY_DN808_c0_g1_i1	691.918	-4.65681	0.712852	-3.72701	0.000193764	0.00696668	TMW87700.1	Uncharacterized protein	EJD97_019599	Solanum chilense (Tomato) (Lycopersicon chilense)	heme binding [GO:0020037]; iron ion binding [GO:0005506]; monooxygenase activity [GO:0004497]; oxidoreductase activity, acting on paired donors, with incorporation or reduction of molecular oxygen [GO:0016705]	--	--	--	--	CCG000365.1	NAC
TRINITY_DN8210_c0_g1_i1	697.454	-4.93106	0.614552	-4.76943	1.84749e-06	0.000141719	XP_020277046.1	--	--	--	--	--	--	--	--	--	--
TRINITY_DN82182_c0_g1_i2	52887.8	-3.55007	0.287239	-5.39644	6.79761e-08	7.53795e-06	XP_020244095.1	--	--	--	--	--	--	--	--	Pbr004711.1	NAC
TRINITY_DN8241_c0_g1_i2	2014.22	-5.26243	0.657865	-4.95912	7.08132e-07	6.1147e-05	XP_028085977.1	--	--	--	--	--	--	--	--	--	--
TRINITY_DN8267_c2_g1_i1	70.6386	-9.81337	1.89702	-4.11876	3.80914e-05	0.00181849	ONK67478.1	RING--type domain--containing protein	A4U43_C05F470	Asparagus officinalis (Garden asparagus)	--	integral component of membrane [GO:0016021]	--	--	O	--	--
TRINITY_DN8271_c0_g1_i2	77.3553	-6.38999	1.40657	-3.12106	0.001802	0.0424055	--	--	--	--	--	--	--	--	--	--	--
TRINITY_DN8274_c1_g1_i5	300.404	-4.61364	0.796008	-3.28343	0.00102551	0.0269048	XP_008812793.1	--	--	--	--	--	--	--	--	--	--
TRINITY_DN8290_c1_g4_i1	38.114	-6.57269	1.4132	-3.23571	0.00121342	0.0308768	--	--	--	--	--	--	--	--	--	--	--
TRINITY_DN82940_c4_g1_i1	5744.95	-5.32164	0.541024	-6.13955	8.27564e-10	1.49624e-07	AAA33703.1	Chlorophyll a--b binding protein, chloroplastic (Fragment)	--	Petunia hybrida (Petunia)	chlorophyll binding [GO:0016168]	chloroplast thylakoid membrane [GO:0009535]; photosystem I [GO:0009522]; photosystem II [GO:0009523]	photosynthesis, light harvesting [GO:0009765]; protein--chromophore linkage [GO:0018298]	--	M	Bradi3g42627.5.p	ERF
TRINITY_DN82940_c7_g1_i1	36128.2	-4.17456	0.484246	-4.4906	7.10213e-06	0.000444467	WP_139162119.1	--	--	--	--	--	--	--	--	Bradi3g42627.5.p	ERF
TRINITY_DN8314_c0_g1_i1	4331.85	-4.71065	0.562655	-4.8176	1.45294e-06	0.000115085	XP_020247195.1	--	--	--	--	--	--	--	--	--	--
TRINITY_DN83305_c0_g1_i2	135.746	-10.7573	1.54786	-5.6577	1.53418e-08	2.04583e-06	--	--	--	--	--	--	--	--	--	--	--
TRINITY_DN83481_c0_g1_i1	293.815	-7.98954	1.04067	-5.75546	8.64039e-09	1.20828e-06	--	--	--	--	--	--	--	--	--	--	--
TRINITY_DN84038_c2_g1_i1	849.531	-8.55197	0.607482	-10.7855	4.03241301603948E--027	9.10288435420797E--024	KAE8775793.1	--	--	--	--	--	--	--	--	--	--
TRINITY_DN84066_c0_g1_i1	4312.57	-3.16221	0.320055	-3.63127	0.000282026	0.00937951	--	--	--	--	--	--	--	--	--	--	--
TRINITY_DN84266_c0_g1_i2	180.964	-7.80516	0.910854	-6.37332	1.84982e-10	3.72367e-08	XP_020265554.1	--	--	--	--	--	--	--	--	KN538722.1_FGP037	HB--PHD
TRINITY_DN8468_c0_g1_i2	6622.57	-3.47537	0.356028	-4.14397	3.41351e-05	0.00165208	XP_010910854.1	mitochondrial carnitine/acylcarnitine carrier--like protein isoform X1	LOC105036817	Elaeis guineensis var. tenera (Oil palm)	--	integral component of membrane [GO:0016021]	--	--	--	--	--
TRINITY_DN8493_c1_g1_i2	13039.2	-3.94639	0.570931	-3.40915	0.000651645	0.018604	XP_020251450.1	--	--	--	--	--	--	--	--	--	--
TRINITY_DN853_c0_g2_i1	475.559	-5.91746	0.449882	-8.70774	3.09990678182059E--018	2.2265784984695E--015	XP_009381663.1	Uncharacterized protein	103969738	Musa acuminata subsp. malaccensis (Wild banana) (Musa malaccensis)	S--adenosylmethionine--dependent methyltransferase activity [GO:0008757]	--	methylation [GO:0032259]	--	--	EMT20798	MYB_related
TRINITY_DN8737_c0_g1_i1	1362.59	-4.41546	0.552728	-4.37007	1.24208e-05	0.000699728	XP_020269108.1	--	--	--	--	--	--	--	--	--	--
TRINITY_DN8915_c0_g1_i2	746.929	-4.61173	0.527606	-4.95015	7.41553e-07	6.33406e-05	--	--	--	--	--	--	--	--	--	--	--
TRINITY_DN8915_c0_g2_i3	747.479	-4.48485	0.472749	-5.25617	1.47082e-07	1.48987e-05	--	--	--	--	--	--	--	--	--	--	--
TRINITY_DN8941_c0_g1_i4	60.4087	-5.22964	0.968097	-3.33608	0.0008497	0.0230902	--	--	--	--	--	--	--	--	--	--	--
TRINITY_DN9004_c5_g1_i3	2489.84	-3.50879	0.328929	-4.58699	4.49689e-06	0.000304978	RZB75060.1	Photosystem I subunit O isoform B	D0Y65_033804	Glycine soja (Wild soybean)	--	integral component of membrane [GO:0016021]	--	--	--	--	--
TRINITY_DN9044_c11_g1_i1	8275.99	-3.67715	0.356565	-4.70363	2.55575e-06	0.00018654	A9SMC8.1	--	--	--	--	--	--	--	H	--	--
TRINITY_DN9068_c0_g1_i2	66.4378	-4.43303	0.731257	-3.32719	0.000877263	0.0236561	--	--	--	--	--	--	--	--	--	--	--
TRINITY_DN90853_c0_g1_i4	58587.5	-3.97055	0.507403	-3.88359	0.000102924	0.00419715	XP_020255397.1	--	--	--	--	--	--	--	--	--	--
TRINITY_DN91_c0_g1_i3	218.94	-7.51359	0.811864	-6.79127	1.11153e-11	2.856e-09	--	--	--	--	--	--	--	--	--	--	--
TRINITY_DN912_c0_g1_i1	1049.42	-7.54593	0.763147	-7.26719	3.67046e-13	1.16001e-10	XP_020257706.1	--	--	--	--	--	--	--	--	--	--
TRINITY_DN9134_c0_g1_i4	75.6098	-5.82701	0.888573	-4.30691	1.65548e-05	0.000894354	--	--	--	--	--	--	--	--	--	--	--
TRINITY_DN9174_c0_g1_i1	679.017	-4.53569	0.541421	-4.6834	2.82161e-06	0.000201296	XP_020680264.1	--	--	--	--	--	--	--	--	--	--
TRINITY_DN9209_c0_g1_i2	7986.65	-7.87941	0.919836	-6.3918	1.63943e-10	3.32132e-08	XP_020245715.1	--	--	--	--	--	--	--	G	Lus10007348	MYB_related
TRINITY_DN9231_c0_g1_i12	127.625	-10.668	1.55831	-5.56245	2.66014e-08	3.27125e-06	--	--	--	--	--	--	--	--	--	--	--
TRINITY_DN92477_c0_g1_i1	29.5073	-8.55353	1.86732	-3.50959	0.000448806	0.0136517	XP_020248087.1	--	--	--	--	--	--	--	--	--	--
TRINITY_DN92873_c0_g1_i13	107131	-3.07682	0.289234	-3.72302	0.000196854	0.00706171	XP_006404376.1	Chlorophyll a--b binding protein, chloroplastic	EUTSA_v10010659mg	Eutrema salsugineum (Saltwater cress) (Sisymbrium salsugineum)	chlorophyll binding [GO:0016168]	chloroplast thylakoid membrane [GO:0009535]; photosystem I [GO:0009522]; photosystem II [GO:0009523]	photosynthesis, light harvesting [GO:0009765]; protein--chromophore linkage [GO:0018298]	--	--	Bradi3g42627.5.p	ERF
TRINITY_DN9291_c0_g1_i12	227.068	-4.30362	0.519649	-4.43303	9.29176e-06	0.000554069	XP_022753165.1	auxin transporter--like protein 3	LOC111301619	Durio zibethinus (Durian)	--	integral component of membrane [GO:0016021]	amino acid transport [GO:0006865]	--	--	--	--
TRINITY_DN9292_c0_g1_i5	14163.3	-5.3513	0.718994	-4.66109	3.14534e-06	0.000222882	--	--	--	--	--	--	--	--	C	--	--
TRINITY_DN93112_c0_g1_i2	2542.38	-5.24252	0.478474	-6.7768	1.22867e-11	3.10646e-09	ABA46878.1	Ribulose bisphosphate carboxylase small subunit (RuBisCO small subunit) (Fragment)	rbcS--Mb2	Musa balbisiana (Banana)	monooxygenase activity [GO:0004497]; ribulose--bisphosphate carboxylase activity [GO:0016984]	chloroplast [GO:0009507]	photorespiration [GO:0009853]; reductive pentose--phosphate cycle [GO:0019253]	--	--	mrna16933.1--v1.0--hybrid	M--type_MADS
TRINITY_DN9382_c0_g1_i13	67128.4	-3.38219	0.294608	-4.69164	2.71029e-06	0.000195116	XP_020253235.1	--	--	--	--	--	--	--	--	--	--
TRINITY_DN94161_c0_g1_i1	1298.55	-3.5562	0.415897	-3.74178	0.000182719	0.00667289	--	--	--	--	--	--	--	--	--	--	--
TRINITY_DN9468_c1_g1_i1	100.541	-5.93834	0.972841	-4.04828	5.15943e-05	0.00237349	--	--	--	--	--	--	--	--	--	--	--
TRINITY_DN94948_c0_g1_i6	97050.8	-2.78396	0.250204	-3.13329	0.00172856	0.0411986	XP_030952967.1	--	--	--	--	--	--	--	--	--	--
TRINITY_DN9527_c0_g1_i7	130.086	-4.79601	0.606249	-4.61198	3.98847e-06	0.000273431	XP_020265371.1	--	--	--	--	--	--	--	--	--	--
TRINITY_DN9566_c0_g1_i1	106.216	-4.574	0.825316	-3.1188	0.00181588	0.0425612	XP_020260743.1	--	--	--	--	--	--	--	--	GRMZM5G899865_P01	bHLH
TRINITY_DN9631_c0_g1_i1	360.838	-24.1625	4.78491	-4.63174	3.62607e-06	0.000251312	--	--	--	--	--	--	--	--	--	--	--
TRINITY_DN96554_c0_g1_i1	43.9542	-9.12882	2.24272	-3.17865	0.00147964	0.0363345	XP_010934083.3	probable carboxylesterase 8	LOC105054288	Elaeis guineensis var. tenera (Oil palm)	hydrolase activity [GO:0016787]	--	--	--	--	ORUFI11G02320.1	NAC
TRINITY_DN9658_c0_g1_i3	212.494	-5.96796	0.927506	-4.27809	1.88503e-05	0.000989609	XP_020257265.1	--	--	--	--	--	--	--	--	--	--
TRINITY_DN9658_c0_g2_i1	299.437	-6.07133	0.959744	-4.2421	2.21437e-05	0.00111794	XP_020257264.1	--	--	--	--	--	--	--	--	--	--
TRINITY_DN9760_c0_g1_i5	40.2982	-9.00424	1.73609	-4.0345	5.47195e-05	0.00248114	--	--	--	--	--	--	--	--	--	--	--
TRINITY_DN9810_c0_g1_i2	188.785	-4.30769	0.477782	-4.83001	1.36525e-06	0.000108743	--	--	--	--	--	--	--	--	--	--	--

## Sheet: Ak_upregulated
TranscriptID	baseMean	log2FoldChange	lfcSE	stat	pvalue	padj	nrdb	Protein names	Gene names	Organism	Gene ontology (molecular function)	Gene ontology (cellular component)	Gene ontology (biological process)	Pathway	COG Functional cat.	TFDB_ID	TFDB_Family
TRINITY_DN13251_c0_g1_i2	198.081	24.2601	4.78499	4.65207	3.28622e-06	0.000231825	-	-	-	-	-	-	-	-	-	-	-
TRINITY_DN20467_c0_g1_i6	179.453	24.1259	4.78501	4.62401	3.76395e-06	0.000260297	-	-	-	-	-	-	-	-	-	-	-
TRINITY_DN439220_c0_g1_i1	161.351	23.9794	4.78504	4.59336	4.36158e-06	0.000297076	AIQ81026.1	-	-	-	-	-	-	-	-	-	-
TRINITY_DN16364_c0_g1_i1	93.6151	23.2413	4.78525	4.43892	9.04122e-06	0.000541172	-	-	-	-	-	-	-	-	-	-	-
TRINITY_DN379580_c0_g1_i1	88.943	23.1696	4.78528	4.4239	9.69352e-06	0.000572624	RYN94829.1	-	-	-	-	-	-	-	-	-	-
TRINITY_DN16874_c1_g1_i5	88.6772	23.1643	4.78528	4.42279	9.74353e-06	0.000574505	-	-	-	-	-	-	-	-	-	-	-
TRINITY_DN1790_c0_g6_i1	86.0013	23.1243	4.7853	4.41441	1.01286e-05	0.000591692	-	-	-	-	-	-	-	-	-	-	-
TRINITY_DN28225_c1_g1_i1	84.4795	23.0825	4.78531	4.40567	1.05456e-05	0.000610408	-	-	-	-	-	-	-	-	-	-	-
TRINITY_DN10785_c0_g1_i6	16988.7	6.55818	0.247746	18.3986	1.34834e-75	4.2613e-71	ABB70124.1	Homogentisate phytyltransferase VTE2-1	VTE2-1	Allium porrum (Leek) (Allium ampeloprasum var. porrum)	prenyltransferase activity [GO:0004659]	integral component of membrane [GO:0016021]	vitamin E biosynthetic process [GO:0010189]	PATHWAY: Cofactor biosynthesis; tocopherol biosynthesis. {ECO:0000256|ARBA:ARBA00024015}.	H	-	-
TRINITY_DN8036_c0_g1_i2	618.266	12.517	1.4889	7.06365	1.62183e-12	4.57647e-10	XP_018387959.1	-	-	-	-	-	-	-	-	-	-
TRINITY_DN33969_c0_g1_i3	395.85	11.8735	1.50939	6.54135	6.09641e-11	1.33799e-08	XP_020260298.1	-	-	-	-	-	-	-	-	-	-
TRINITY_DN3730_c0_g1_i6	303.998	11.4927	1.50816	6.29419	3.09006e-10	5.95476e-08	-	-	-	-	-	-	-	-	-	-	-
TRINITY_DN55468_c0_g1_i1	293.188	11.4407	2.90322	3.25179	0.00114681	0.0294426	P43156.1	-	-	-	-	-	-	-	-	-	-
TRINITY_DN6128_c1_g1_i1	284.183	11.3951	1.68596	5.57255	2.51042e-08	3.09919e-06	-	-	-	-	-	-	-	-	-	-	-
TRINITY_DN321000_c0_g1_i1	238.071	11.1405	2.96031	3.08768	0.00201724	0.0465011	RYO71514.1	-	-	-	-	-	-	-	-	-	-
TRINITY_DN3730_c0_g2_i3	233.173	11.1097	1.53204	5.9461	2.74602e-09	4.17236e-07	-	-	-	-	-	-	-	-	-	-	-
TRINITY_DN2846_c0_g1_i1	1150.53	11.0371	1.24303	7.27016	3.5905e-13	1.1462e-10	-	-	-	-	-	-	-	-	-	-	-
TRINITY_DN10689_c0_g1_i2	556.008	10.9393	1.46925	6.08429	1.17011e-09	2.02078e-07	-	-	-	-	-	-	-	-	-	-	-
TRINITY_DN15437_c0_g1_i5	187.982	10.7985	1.65713	5.30948	1.09938e-07	1.1818e-05	-	-	-	-	-	-	-	-	-	-	-
TRINITY_DN12968_c0_g1_i3	185.308	10.7778	1.59907	5.48931	4.0351e-08	4.7584e-06	XP_020246731.1	-	-	-	-	-	-	-	-	-	-
TRINITY_DN1044_c0_g1_i1	182.606	10.7567	1.67532	5.22685	1.72422e-07	1.72444e-05	-	-	-	-	-	-	-	-	-	676777512	ERF
TRINITY_DN17421_c0_g1_i2	173.29	10.681	1.64462	5.27843	1.30295e-07	1.35456e-05	XP_020252766.1	-	-	-	-	-	-	-	-	Sopen10g007160.1	M-type_MADS
TRINITY_DN111_c0_g1_i2	16555.6	3.7111	0.256203	6.67869	2.41089e-11	5.56159e-09	AMN16535.1	Sucrose synthase (EC 2.4.1.13)	Sus1	Albuca bracteata (False sea onion) (Ornithogalum longebracteatum)	sucrose synthase activity [GO:0016157]	-	sucrose metabolic process [GO:0005985]	-	-	mrna11429.1-v1.0-hybrid	HB-other
TRINITY_DN2852_c0_g1_i22	154.125	10.5138	1.54223	5.52047	3.38089e-08	4.079e-06	XP_020268746.1	-	-	-	-	-	-	-	-	-	-
TRINITY_DN2273_c0_g2_i1	152.918	10.5029	1.80529	4.70998	2.47739e-06	0.000181239	-	-	-	-	-	-	-	-	S	-	-
TRINITY_DN4805_c0_g1_i4	138.595	10.3613	1.63675	5.10849	3.24747e-07	3.07284e-05	XP_008795221.1	-	-	-	-	-	-	-	-	-	-
TRINITY_DN15832_c4_g1_i1	133.411	10.3038	1.57016	5.28853	1.23303e-07	1.29896e-05	-	-	-	-	-	-	-	-	-	-	-
TRINITY_DN25283_c0_g1_i2	131.547	10.2832	1.63307	5.07218	3.93276e-07	3.65562e-05	-	-	-	-	-	-	-	-	-	-	-
TRINITY_DN866_c0_g1_i2	127.37	10.2392	1.57519	5.23061	1.68954e-07	1.70097e-05	RYN23686.1	-	-	-	-	-	-	-	-	-	-
TRINITY_DN4131_c0_g1_i3	117.875	10.1277	1.77873	4.56939	4.89137e-06	0.00032821	KNG51386.1	-	-	-	-	-	-	-	-	-	-
TRINITY_DN16051_c3_g1_i4	108.04	10.0006	1.56057	5.1267	2.94865e-07	2.8325e-05	-	-	-	-	-	-	-	-	-	-	-
TRINITY_DN14835_c0_g2_i1	106.985	9.98804	1.67605	4.766	1.87921e-06	0.00014311	XP_008778698.1	-	-	-	-	-	-	-	-	-	-
TRINITY_DN1801_c0_g1_i2	101.558	9.91255	1.99378	3.96862	7.22904e-05	0.00313397	EMR63991.1	-	-	-	-	-	-	-	-	-	-
TRINITY_DN20775_c0_g1_i2	2318.62	9.91134	2.29763	3.44326	0.000574747	0.0168032	XP_020276203.1	-	-	-	-	-	-	-	-	Aco013131.1	DBB
TRINITY_DN11449_c0_g1_i1	98.9412	9.87505	1.60682	4.90102	9.534e-07	7.99237e-05	XP_020245433.1	-	-	-	-	-	-	-	-	-	-
TRINITY_DN319414_c0_g1_i1	97.1886	9.84867	1.57914	4.97023	6.68735e-07	5.85449e-05	KAB2103095.1	-	-	-	-	-	-	-	-	-	-
TRINITY_DN2518_c0_g3_i1	96.4063	9.83766	1.9004	4.12422	3.72e-05	0.00178402	-	-	-	-	-	-	-	-	-	-	-
TRINITY_DN2416_c0_g2_i1	95.2959	9.8212	1.66737	4.69075	2.72203e-06	0.000195516	RYN30555.1	-	-	-	-	-	-	-	-	-	-
TRINITY_DN29780_c0_g1_i1	94.0175	9.80175	1.72788	4.51522	6.32521e-06	0.000402217	-	-	-	-	-	-	-	-	-	-	-
TRINITY_DN11137_c0_g1_i9	8924.62	3.13918	0.359013	3.1731	0.00150823	0.0369213	ANH58213.1	Glutathione S-transferase	GSTL1	Dracaena cambodiana	glutathione transferase activity [GO:0004364]	-	glutathione metabolic process [GO:0006749]	-	T	-	-
TRINITY_DN422235_c0_g1_i1	822.686	9.69022	1.96604	3.91152	9.17159e-05	0.00383411	KAB2099742.1	-	-	-	-	-	-	-	-	-	-
TRINITY_DN2857_c0_g1_i1	82.6248	9.61547	1.68395	4.52239	6.11467e-06	0.000391984	RYN54322.1	-	-	-	-	-	-	-	-	-	-
TRINITY_DN13984_c0_g1_i2	81.3576	9.59323	1.74275	4.35703	1.31838e-05	0.00073779	-	-	-	-	-	-	-	-	-	-	-
TRINITY_DN6357_c0_g1_i1	428.809	9.59148	1.12054	6.77482	1.24558e-11	3.12409e-09	XP_020271241.1	-	-	-	-	-	-	-	-	-	-
TRINITY_DN2916_c0_g1_i1	81.1961	9.58928	1.59817	4.74872	2.04705e-06	0.000154404	-	-	-	-	-	-	-	-	-	-	-
TRINITY_DN2504_c0_g1_i38	2612.27	9.50461	2.21435	3.38907	0.000701292	0.0196835	XP_020246451.1	-	-	-	-	-	-	-	-	-	-
TRINITY_DN39334_c0_g1_i1	76.0992	9.49682	1.83492	4.08564	4.39561e-05	0.00206111	XP_018391445.1	-	-	-	-	-	-	-	-	-	-
TRINITY_DN42411_c0_g1_i1	394.732	9.46979	1.11514	6.6985	2.1057e-11	5.00365e-09	-	-	-	-	-	-	-	-	-	PK00408.1	WRKY
TRINITY_DN1978_c0_g2_i1	385.966	9.46044	1.23928	6.01997	1.74453e-09	2.84197e-07	XP_020257536.1	-	-	-	-	-	-	-	-	NNU_016725-RA	GRAS
TRINITY_DN977_c0_g4_i1	74.2081	9.45685	1.8494	4.03204	5.52953e-05	0.00249294	XP_020248155.1	-	-	-	-	-	-	-	-	CCG013831.1	bZIP
TRINITY_DN42145_c0_g1_i1	73.9516	9.45233	2.1296	3.49941	0.000466287	0.0140616	XP_020252288.1	-	-	-	-	-	-	-	-	Glyma.13G227100.1.p	ERF	ERF096
TRINITY_DN375020_c0_g1_i1	73.0916	9.43489	1.74323	4.265	1.99906e-05	0.00103233	-	-	-	-	-	-	-	-	-	-	-
TRINITY_DN71011_c0_g1_i2	71.5004	9.40368	1.63784	4.52041	6.17206e-06	0.000394064	-	-	-	-	-	-	-	-	-	-	-
TRINITY_DN12035_c0_g1_i1	71.1717	9.39723	2.27398	3.25298	0.00114202	0.0293762	-	-	-	-	-	-	-	-	-	-	-
TRINITY_DN471588_c0_g1_i1	70.7125	9.39094	1.87249	3.94712	7.90977e-05	0.00338727	KAB2107546.1	-	-	-	-	-	-	-	-	-	-
TRINITY_DN10434_c0_g3_i1	70.651	9.38937	2.0475	3.60896	0.000307423	0.0100771	-	-	-	-	-	-	-	-	-	-	-
TRINITY_DN10434_c0_g1_i16	68.3299	9.3378	1.69012	4.34157	1.41466e-05	0.000779681	-	-	-	-	-	-	-	-	-	-	-
TRINITY_DN23131_c1_g1_i1	67.9047	9.33237	1.96867	3.72453	0.00019568	0.00702757	XP_028503395.1	-	-	-	-	-	-	-	-	-	-
TRINITY_DN2099_c1_g1_i1	67.9503	9.32998	1.66117	4.41253	1.02167e-05	0.000595737	-	-	-	-	-	-	-	-	-	-	-
TRINITY_DN463_c0_g1_i1	66.4882	9.29848	2.00098	3.64746	0.000264846	0.00894253	RYN54650.1	-	-	-	-	-	-	-	-	-	-
TRINITY_DN49434_c1_g1_i6	66.1639	9.29209	1.63357	4.4639	8.048e-06	0.000491021	-	-	-	-	-	-	-	-	P	-	-
TRINITY_DN21704_c0_g2_i1	66.1032	9.29063	2.32319	3.1382	0.0016999	0.0406689	XP_018380124.1	-	-	-	-	-	-	-	-	-	-
TRINITY_DN5623_c0_g1_i2	65.5221	9.27736	1.67687	4.33984	1.42587e-05	0.000783706	-	-	-	-	-	-	-	-	-	-	-
TRINITY_DN21336_c0_g1_i12	64.4501	9.25542	1.62225	4.47244	7.73325e-06	0.000477347	-	-	-	-	-	-	-	-	-	-	-
TRINITY_DN3756_c0_g2_i1	64.149	9.24665	1.70252	4.25641	2.07731e-05	0.0010675	-	-	-	-	-	-	-	-	-	-	-
TRINITY_DN24436_c0_g2_i1	64.1434	9.24656	1.69625	4.2721	1.93644e-05	0.00101323	-	-	-	-	-	-	-	-	-	-	-
TRINITY_DN4524_c0_g2_i1	63.4284	9.23359	1.65052	4.38261	1.17264e-05	0.000666548	-	-	-	-	-	-	-	-	-	-	-
TRINITY_DN11211_c0_g1_i1	678.779	6.91588	0.753832	6.52118	6.97555e-11	1.52038e-08	THU65127.1	CASP-like protein	C4D60_Mb05t00370	Musa balbisiana (Banana)	-	integral component of membrane [GO:0016021]; plasma membrane [GO:0005886]	-	-	-	-	-
TRINITY_DN16406_c0_g1_i1	63.4512	9.23087	1.70368	4.24427	2.19308e-05	0.00110896	XP_026656530.1	-	-	-	-	-	-	-	L	DCAR_006074	MYB_related
TRINITY_DN20313_c0_g1_i1	63.3729	9.23	1.6373	4.41581	1.00634e-05	0.000588967	XP_020274487.1	-	-	-	-	-	-	-	-	-	-
TRINITY_DN77877_c0_g1_i1	62.9928	9.22435	1.74595	4.13778	3.50685e-05	0.00169207	-	-	-	-	-	-	-	-	-	-	-
TRINITY_DN1745_c7_g2_i1	62.3682	9.20634	1.66804	4.32025	1.55855e-05	0.000847785	-	-	-	-	-	-	-	-	-	-	-
TRINITY_DN30194_c0_g1_i1	62.2395	9.20583	1.63713	4.40151	1.075e-05	0.00061997	PSN67018.1	-	-	-	-	-	-	-	-	-	-
TRINITY_DN1555_c0_g1_i1	62.0943	9.2033	1.68043	4.28657	1.81452e-05	0.000958967	XP_020127275.1	-	-	-	-	-	-	-	-	-	-
TRINITY_DN18576_c0_g1_i3	61.5979	9.18826	1.68305	4.27097	1.94628e-05	0.00101502	-	-	-	-	-	-	-	-	-	-	-
TRINITY_DN10371_c0_g1_i4	60.9327	9.17578	2.20533	3.25383	0.0011386	0.0293511	KAB2105410.1	-	-	-	-	-	-	-	-	-	-
TRINITY_DN274692_c0_g1_i1	60.894	9.17552	1.77715	4.03766	5.39874e-05	0.00246208	-	-	-	-	-	-	-	-	-	-	-
TRINITY_DN7466_c1_g1_i4	60.911	9.17514	1.65524	4.3348	1.45891e-05	0.000797705	-	-	-	-	-	-	-	-	L	-	-
TRINITY_DN33604_c0_g1_i1	59.9345	9.14884	1.67935	4.25692	2.07264e-05	0.00106684	XP_020268843.1	-	-	-	-	-	-	-	-	-	-
TRINITY_DN14109_c0_g1_i4	4209.45	9.14336	0.769371	9.28467	1.62203e-20	1.50773e-17	-	-	-	-	-	-	-	-	-	-	-
TRINITY_DN67750_c0_g1_i4	58.6063	9.11619	1.96054	3.62972	0.000283734	0.00941926	-	-	-	-	-	-	-	-	-	-	-
TRINITY_DN4500_c0_g1_i2	58.0142	9.10189	1.68107	4.22462	2.39349e-05	0.0012007	XP_020256456.1	-	-	-	-	-	-	-	F	Lus10018414	MYB_related
TRINITY_DN11887_c0_g1_i3	324.003	8.27864	1.27178	4.93688	7.93813e-07	6.74399e-05	PRQ52345.1	Putative RNA-directed DNA polymerase (EC 2.7.7.49)	RchiOBHm_Chr2g0154461	Rosa chinensis (China rose)	nucleic acid binding [GO:0003676]; RNA-directed DNA polymerase activity [GO:0003964]	-	DNA integration [GO:0015074]	-	-	Rsa1.0_02878.1_g00005.1	LBD
TRINITY_DN117904_c0_g1_i1	56.9592	9.07554	1.67509	4.22398	2.40029e-05	0.0012022	-	-	-	-	-	-	-	-	CG	-	-
TRINITY_DN13825_c0_g1_i3	56.8089	9.0715	2.1219	3.33262	0.000860317	0.0232587	-	-	-	-	-	-	-	-	-	-	-
TRINITY_DN10895_c0_g4_i3	56.1721	9.05552	1.67464	4.21315	2.51836e-05	0.00125339	-	-	-	-	-	-	-	-	-	-	-
TRINITY_DN20540_c0_g2_i1	55.9541	9.05277	1.67267	4.21647	2.48155e-05	0.00123897	KAB2108183.1	-	-	-	-	-	-	-	-	-	-
TRINITY_DN321683_c0_g1_i1	55.9094	9.05216	1.72069	4.09846	4.15914e-05	0.00196481	XP_018383790.1	-	-	-	-	-	-	-	-	-	-
TRINITY_DN12727_c0_g2_i1	55.463	9.03946	1.65449	4.25476	2.09278e-05	0.0010737	OWY52719.1	-	-	-	-	-	-	-	-	-	-
TRINITY_DN726_c0_g1_i7	55.1505	9.03043	1.64777	4.26664	1.98435e-05	0.00102978	RYN37396.1	-	-	-	-	-	-	-	-	-	-
TRINITY_DN469348_c0_g1_i1	55.0661	9.03008	2.09856	3.34995	0.000808247	0.0221159	RYN50596.1	-	-	-	-	-	-	-	-	-	-
TRINITY_DN1200_c0_g4_i7	10487.5	3.14422	0.23091	4.95526	7.22353e-07	6.2036e-05	RWW16172.1	Uncharacterized protein	GW17_00019953	Ensete ventricosum (Abyssinian banana) (Musa ensete)	transferase activity, transferring acyl groups other than amino-acyl groups [GO:0016747]	-	-	-	-	-	-
TRINITY_DN72564_c0_g1_i6	53.7831	8.99221	1.74091	4.01641	5.90925e-05	0.00264153	-	-	-	-	-	-	-	-	-	-	-
TRINITY_DN17468_c0_g2_i4	53.3473	8.98396	1.68139	4.15369	3.27163e-05	0.00158584	KNG48170.1	-	-	-	-	-	-	-	-	-	-
TRINITY_DN25081_c0_g1_i1	53.2244	8.98113	1.72109	4.05623	4.9872e-05	0.0023069	-	-	-	-	-	-	-	-	-	-	-
TRINITY_DN47614_c0_g1_i1	53.0458	8.97633	1.72835	4.03642	5.42727e-05	0.00246796	RII10920.1	-	-	-	-	-	-	-	-	-	-
TRINITY_DN20613_c0_g1_i1	52.2703	8.95136	1.70532	4.07628	4.57613e-05	0.00213625	-	-	-	-	-	-	-	-	-	-	-
TRINITY_DN422797_c0_g1_i1	52.0921	8.94638	2.15871	3.21784	0.00129158	0.0327076	-	-	-	-	-	-	-	-	-	-	-
TRINITY_DN8225_c0_g1_i1	51.9402	8.94572	2.16858	3.20288	0.00136059	0.0341271	XP_018381249.1	-	-	-	-	-	-	-	-	-	-
TRINITY_DN6808_c0_g4_i1	51.8295	8.93862	1.84248	3.76591	0.000165943	0.00619914	-	-	-	-	-	-	-	-	-	-	-
TRINITY_DN17571_c0_g1_i16	51.5891	8.93399	1.6604	4.1761	2.96551e-05	0.00144856	-	-	-	-	-	-	-	-	-	-	-
TRINITY_DN124482_c1_g1_i1	1054.79	3.69658	0.405485	4.18408	2.86318e-05	0.00140292	AAA32640.1	Chitinase (EC 3.2.1.14) (Fragment)	chitinase	Allium sativum (Garlic)	chitinase activity [GO:0004568]; chitin binding [GO:0008061]	-	cell wall macromolecule catabolic process [GO:0016998]; chitin catabolic process [GO:0006032]; polysaccharide catabolic process [GO:0000272]	-	O	Peinf101Scf00562g09013.1	NAC
TRINITY_DN26686_c0_g1_i2	51.2095	8.92419	1.66629	4.15546	3.24639e-05	0.00157602	XP_018387326.1	-	-	-	-	-	-	-	-	-	-
TRINITY_DN25518_c0_g1_i4	49.172	8.86649	1.70163	4.03524	5.45474e-05	0.00247689	XP_018381939.1	-	-	-	-	-	-	-	-	-	-
TRINITY_DN12559_c0_g2_i3	856.79	3.85433	0.386306	4.80014	1.58551e-06	0.000124339	XP_006856498.1	Protein kinase domain-containing protein	AMTR_s00046p00085030	Amborella trichopoda	ATP binding [GO:0005524]; protein serine/threonine kinase activity [GO:0004674]	plasma membrane [GO:0005886]	protein phosphorylation [GO:0006468]	-	-	MDP0000560255	bHLH
TRINITY_DN12742_c0_g1_i5	47.6929	8.82015	1.68151	4.05596	4.9928e-05	0.0023069	XP_018387678.1	-	-	-	-	-	-	-	-	-	-
TRINITY_DN24465_c0_g1_i1	614.989	8.81759	0.819358	8.32065	8.74802e-17	4.93701e-14	-	-	-	-	-	-	-	-	-	-	-
TRINITY_DN11089_c0_g1_i1	47.4805	8.81658	1.76416	3.86393	0.000111575	0.00446356	OWY48116.1	-	-	-	-	-	-	-	-	-	-
TRINITY_DN32396_c0_g1_i1	47.1458	8.80424	1.67776	4.05556	5.00145e-05	0.00230753	XP_018383711.1	-	-	-	-	-	-	-	-	-	-
TRINITY_DN17120_c0_g1_i2	46.8721	8.79799	1.76822	3.84454	0.000120779	0.00474176	RYN39552.1	-	-	-	-	-	-	-	-	-	-
TRINITY_DN472926_c0_g1_i2	46.4872	8.78287	1.69456	4.00273	6.26145e-05	0.00276672	-	-	-	-	-	-	-	-	-	-	-
TRINITY_DN13064_c0_g1_i2	45.9122	8.76648	1.68582	4.01376	5.97583e-05	0.00266535	XP_009350631.1	-	-	-	-	-	-	-	-	-	-
TRINITY_DN9133_c0_g4_i2	45.9294	8.7642	1.96632	3.44002	0.000581664	0.0169865	-	-	-	-	-	-	-	-	-	-	-
TRINITY_DN6241_c0_g1_i4	45.6944	8.76074	1.71945	3.93193	8.42677e-05	0.00357712	XP_028510406.1	-	-	-	-	-	-	-	-	Sopen08g023720.1	bHLH
TRINITY_DN23191_c1_g1_i4	45.7731	8.75939	2.03975	3.31383	0.000920282	0.0245854	XP_020259172.1	-	-	-	-	-	-	-	-	MDP0000321492	Trihelix
TRINITY_DN14606_c0_g1_i8	45.6388	8.75578	1.71923	3.92955	8.5106e-05	0.00360548	-	-	-	-	-	-	-	-	-	-	-
TRINITY_DN1384_c0_g1_i9	45.4266	8.75002	1.69002	3.99405	6.49544e-05	0.00283931	XP_028510933.1	-	-	-	-	-	-	-	-	-	-
TRINITY_DN220837_c0_g1_i1	45.203	8.74586	1.81392	3.71894	0.00020006	0.00716047	RYN99498.1	-	-	-	-	-	-	-	-	-	-
TRINITY_DN47999_c0_g1_i1	45.1079	8.7425	2.15443	3.12959	0.00175048	0.0415957	-	-	-	-	-	-	-	-	-	-	-
TRINITY_DN14926_c0_g2_i1	45.0246	8.73884	1.69921	3.96587	7.31292e-05	0.00315646	XP_018390892.1	-	-	-	-	-	-	-	-	-	-
TRINITY_DN470168_c0_g1_i1	44.5834	8.72601	1.84462	3.64629	0.000266051	0.00897361	XP_018389256.1	-	-	-	-	-	-	-	-	-	-
TRINITY_DN270681_c0_g1_i1	44.5106	8.72339	2.10262	3.19762	0.00138567	0.0345368	XP_018391814.1	-	-	-	-	-	-	-	-	-	-
TRINITY_DN16396_c0_g3_i1	999.869	8.71644	0.768024	8.7451	2.22828e-18	1.63773e-15	-	-	-	-	-	-	-	-	S	-	-
TRINITY_DN1258_c0_g1_i8	9357.91	8.71092	1.53452	4.37331	1.22375e-05	0.00069063	-	-	-	-	-	-	-	-	-	-	-
TRINITY_DN43783_c0_g1_i1	44.1762	8.71077	1.6932	3.96337	7.38988e-05	0.00318188	XP_020240692.1	-	-	-	-	-	-	-	-	-	-
TRINITY_DN51776_c0_g1_i3	44.0591	8.70522	1.71404	3.91193	9.15611e-05	0.00383271	-	-	-	-	-	-	-	-	-	-	-
TRINITY_DN7104_c0_g1_i1	43.7689	8.69474	1.80178	3.71563	0.000202702	0.00724682	XP_028511583.1	-	-	-	-	-	-	-	-	-	-
TRINITY_DN13814_c1_g1_i3	43.5172	8.69113	1.91932	3.48619	0.000489945	0.0146631	-	-	-	-	-	-	-	-	-	-	-
TRINITY_DN32239_c1_g1_i4	1260.43	8.67781	0.784403	8.51323	1.69154e-17	1.13743e-14	XP_029120354.1	-	-	-	-	-	-	-	-	ONIVA03G38180.1	LBD
TRINITY_DN1807_c0_g1_i3	42.9871	8.67292	1.75196	3.80882	0.00013963	0.00535543	XP_018386618.1	-	-	-	-	-	-	-	-	-	-
TRINITY_DN32317_c0_g1_i1	42.9373	8.66688	1.90501	3.49966	0.000465856	0.0140616	-	-	-	-	-	-	-	-	-	-	-
TRINITY_DN1461_c1_g1_i1	42.6296	8.66135	1.99745	3.33493	0.000853202	0.0231416	-	-	-	-	-	-	-	-	-	-	-
TRINITY_DN420116_c0_g1_i1	42.1948	8.64191	1.80054	3.68885	0.000225274	0.00788435	XP_018381309.1	12-oxophytodienoate reductase	-	-	-	-	-	-	-	Zmw_sc03297.1.g00030.1	NAC
TRINITY_DN44954_c0_g1_i1	42.0437	8.64068	1.7403	3.81582	0.000135733	0.00523773	-	-	-	-	-	-	-	-	-	-	-
TRINITY_DN12107_c0_g3_i1	42.0046	8.63995	1.80538	3.67787	0.000235191	0.00812346	-	-	-	-	-	-	-	-	I	-	-
TRINITY_DN12603_c0_g1_i5	660.587	8.63423	1.25986	5.26585	1.39545e-07	1.4313e-05	OQD71752.1	-	-	-	-	-	-	-	-	-	-
TRINITY_DN130346_c1_g1_i1	40.3303	8.57724	1.75272	3.7526	0.000175012	0.00647668	XP_027067576.1	senescence-specific cysteine protease SAG39-like	LOC113693205	Coffea arabica (Arabian coffee)	cysteine-type peptidase activity [GO:0008234]	-	-	-	-	FANhyb_rscf00000253.1.g00010.1	BBR-BPC
TRINITY_DN20527_c0_g1_i1	41.2293	8.60843	2.05836	3.21053	0.00132489	0.0334173	-	-	-	-	-	-	-	-	-	-	-
TRINITY_DN1053_c0_g1_i1	40.6314	8.59182	1.78314	3.69676	0.000218372	0.00770249	-	-	-	-	-	-	-	-	-	-	-
TRINITY_DN132981_c2_g1_i1	712.843	4.96019	0.512712	5.77358	7.7603e-09	1.1148e-06	GAU19500.1	Uncharacterized protein	TSUD_77440	Trifolium subterraneum (Subterranean clover)	-	-	-	-	-	-	-
TRINITY_DN20853_c0_g2_i1	40.012	8.56758	1.71441	3.83081	0.00012772	0.004971	XP_018382500.1	-	-	-	-	-	-	-	-	-	-
TRINITY_DN24103_c1_g1_i1	39.973	8.56462	1.74345	3.76531	0.000166345	0.00620682	-	-	-	-	-	-	-	-	-	-	-
TRINITY_DN23769_c1_g3_i1	39.6655	8.55731	2.10639	3.11306	0.00185155	0.0433456	RYN28267.1	-	-	-	-	-	-	-	-	-	-
TRINITY_DN3623_c0_g1_i1	208.627	8.55239	1.13255	5.7855	7.22971e-09	1.04332e-06	XP_008811311.1	-	-	-	-	-	-	-	-	-	-
TRINITY_DN13447_c0_g1_i4	15450.1	3.59786	0.233082	6.85538	7.11255e-12	1.85773e-09	XP_020092607.1	D-lactate dehydrogenase [cytochrome], mitochondrial-like	LOC109713064	Ananas comosus (Pineapple) (Ananas ananas)	FAD binding [GO:0071949]; oxidoreductase activity [GO:0016491]	-	-	-	-	-	-
TRINITY_DN284013_c0_g1_i1	39.3646	8.54246	1.74857	3.74161	0.000182848	0.00667289	-	-	-	-	-	-	-	-	S	-	-
TRINITY_DN27727_c0_g1_i1	39.0685	8.53525	1.79295	3.64497	0.000267427	0.0090104	KAB2100284.1	-	-	-	-	-	-	-	-	Oropetium_20150105_25334A	GeBP
TRINITY_DN13845_c0_g2_i1	104.342	8.52605	1.54114	4.23456	2.29e-05	0.00115428	-	-	-	-	-	-	-	-	-	-	-
TRINITY_DN48255_c0_g1_i1	38.7893	8.52516	1.83358	3.55869	0.000372712	0.011791	-	-	-	-	-	-	-	-	-	-	-
TRINITY_DN11611_c0_g1_i1	38.672	8.52096	1.91709	3.40149	0.000670198	0.0189793	RYN81326.1	-	-	-	-	-	-	-	-	-	-
TRINITY_DN32915_c0_g1_i1	38.4047	8.50582	1.95092	3.33474	0.000853788	0.0231416	XP_026421318.1	-	-	-	-	-	-	-	-	-	-
TRINITY_DN1356_c0_g1_i2	2132.11	3.45085	0.359808	4.03229	5.52364e-05	0.00249294	XP_010921062.1	uncharacterized 38.1 kDa protein isoform X2	LOC105044760	Elaeis guineensis var. tenera (Oil palm)	nuclease activity [GO:0004518]; nucleic acid binding [GO:0003676]	-	-	-	-	-	-
TRINITY_DN3920_c0_g1_i10	2464.45	8.49294	0.587476	11.0523	2.13771e-28	5.19694e-25	-	-	-	-	-	-	-	-	-	-	-
TRINITY_DN23527_c0_g3_i1	37.8628	8.48986	1.78304	3.63977	0.000272883	0.00916492	OWY52546.1	-	-	-	-	-	-	-	-	-	-
TRINITY_DN1594_c0_g2_i1	37.8742	8.48705	1.74667	3.71395	0.000204047	0.00727844	XP_018381520.1	-	-	-	-	-	-	-	-	-	-
TRINITY_DN1352_c0_g1_i1	37.7401	8.48364	1.73077	3.7461	0.000179605	0.00660028	RMZ66098.1	-	-	-	-	-	-	-	-	-	-
TRINITY_DN436_c0_g3_i1	198.161	8.47731	1.13331	5.71538	1.09462e-08	1.5041e-06	-	-	-	-	-	-	-	-	-	-	-
TRINITY_DN27459_c1_g1_i4	37.6064	8.47551	1.91366	3.38384	0.000714791	0.0199561	-	-	-	-	-	-	-	-	-	-	-
TRINITY_DN372669_c0_g1_i1	37.3434	8.4705	2.03499	3.17962	0.00147466	0.0362404	PSN66996.1	-	-	-	-	-	-	-	-	-	-
TRINITY_DN330439_c0_g1_i1	37.2377	8.46356	1.73337	3.72889	0.000192325	0.00694657	RYN34338.1	-	-	-	-	-	-	-	-	-	-
TRINITY_DN2775_c0_g1_i4	37.2102	8.46032	2.08007	3.10582	0.0018975	0.0441269	XP_018387823.1	-	-	-	-	-	-	-	-	-	-
TRINITY_DN28756_c2_g1_i1	37.0755	8.46006	2.07726	3.10989	0.00187158	0.0436205	XP_018384806.1	-	-	-	-	-	-	-	-	-	-
TRINITY_DN3648_c0_g1_i14	37.0981	8.46001	1.7627	3.66483	0.000247504	0.00844721	-	-	-	-	-	-	-	-	-	-	-
TRINITY_DN9177_c0_g2_i1	37.0199	8.45671	1.75295	3.68334	0.000230194	0.00797704	XP_018387741.1	-	-	-	-	-	-	-	-	-	-
TRINITY_DN13650_c0_g2_i1	68.4443	6.84039	1.25209	3.86583	0.00011071	0.00444584	XP_010933723.1	Pectinesterase (EC 3.1.1.11)	LOC105054042	Elaeis guineensis var. tenera (Oil palm)	aspartyl esterase activity [GO:0045330]; enzyme inhibitor activity [GO:0004857]; pectinesterase activity [GO:0030599]	-	cell wall modification [GO:0042545]; pectin catabolic process [GO:0045490]	PATHWAY: Glycan metabolism. {ECO:0000256|ARBA:ARBA00004881}.; PATHWAY: Glycan metabolism; pectin degradation; 2-dehydro-3-deoxy-D-gluconate from pectin: step 1/5. {ECO:0000256|ARBA:ARBA00005184, ECO:0000256|RuleBase:RU000589}.	-	MDP0000320566	NAC
TRINITY_DN1522_c0_g1_i1	36.9362	8.45334	1.75031	3.68698	0.000226932	0.0079276	XP_028500965.1	-	-	-	-	-	-	-	-	-	-
TRINITY_DN15758_c0_g1_i2	36.4842	8.43301	1.75974	3.65566	0.000256519	0.00872662	-	-	-	-	-	-	-	-	-	-	-
TRINITY_DN14063_c0_g1_i2	36.4786	8.43297	1.75379	3.66804	0.000244414	0.00836888	-	-	-	-	-	-	-	-	-	-	-
TRINITY_DN221538_c0_g1_i1	36.3781	8.42947	1.74387	3.68689	0.000227012	0.0079276	XP_007705877.1	-	-	-	-	-	-	-	-	-	-
TRINITY_DN140436_c0_g1_i1	18767.9	4.88241	0.505921	5.69735	1.21684e-08	1.64346e-06	TQE12646.1	Uncharacterized protein	C1H46_001858	Malus baccata (Siberian crab apple) (Pyrus baccata)	-	-	-	-	-	-	-
TRINITY_DN1793_c0_g2_i1	36.2107	8.42257	1.74966	3.67075	0.000241836	0.00830759	XP_028508355.1	-	-	-	-	-	-	-	-	-	-
TRINITY_DN35085_c0_g2_i1	36.11	8.42179	1.82687	3.51518	0.000439451	0.0134187	XP_018391790.1	-	-	-	-	-	-	-	-	-	-
TRINITY_DN318712_c0_g1_i1	35.9369	8.41486	1.82689	3.51135	0.000445843	0.0135877	XP_028511715.1	-	-	-	-	-	-	-	-	-	-
TRINITY_DN17485_c0_g1_i1	35.8756	8.41185	1.78015	3.60185	0.00031596	0.0102732	-	-	-	-	-	-	-	-	-	-	-
TRINITY_DN11706_c0_g2_i1	35.6244	8.40144	1.76899	3.61869	0.000296098	0.00975774	RII14290.1	-	-	-	-	-	-	-	-	-	-
TRINITY_DN16396_c0_g2_i1	4983.47	8.39859	1.59592	4.00935	6.08864e-05	0.0027064	-	-	-	-	-	-	-	-	S	-	-
TRINITY_DN159826_c0_g1_i3	35.5857	8.39585	1.88536	3.39238	0.000692894	0.0194997	-	-	-	-	-	-	-	-	-	-	-
TRINITY_DN11904_c0_g1_i6	35.4684	8.3915	1.8136	3.52421	0.000424743	0.0130962	KAB2103527.1	-	-	-	-	-	-	-	-	-	-
TRINITY_DN61227_c0_g1_i1	380.809	8.38753	0.864391	7.38963	1.47238e-13	5.11351e-11	-	-	-	-	-	-	-	-	-	-	-
TRINITY_DN26112_c0_g1_i1	35.3065	8.38469	1.842	3.46616	0.000527943	0.0156228	-	-	-	-	-	-	-	-	-	-	-
TRINITY_DN10958_c0_g1_i1	35.2841	8.38421	1.79634	3.554	0.000379415	0.011979	-	-	-	-	-	-	-	-	S	-	-
TRINITY_DN30112_c0_g1_i2	35.1275	8.38232	1.90774	3.34548	0.000821405	0.0224177	XP_018381742.1	-	-	-	-	-	-	-	-	-	-
TRINITY_DN13993_c0_g1_i1	35.1109	8.38024	1.76396	3.617	0.000298035	0.00980134	RYN98552.1	-	-	-	-	-	-	-	-	-	-
TRINITY_DN1429_c0_g1_i4	125.706	7.831	1.20823	4.82605	1.39268e-06	0.000110588	XP_010910890.1	Pectinesterase (EC 3.1.1.11)	LOC105036866	Elaeis guineensis var. tenera (Oil palm)	aspartyl esterase activity [GO:0045330]; enzyme inhibitor activity [GO:0004857]; pectinesterase activity [GO:0030599]	-	cell wall modification [GO:0042545]; pectin catabolic process [GO:0045490]	PATHWAY: Glycan metabolism. {ECO:0000256|ARBA:ARBA00004881}.; PATHWAY: Glycan metabolism; pectin degradation; 2-dehydro-3-deoxy-D-gluconate from pectin: step 1/5. {ECO:0000256|ARBA:ARBA00005184, ECO:0000256|RuleBase:RU000589}.	-	Vang03g11510.1	Trihelix
TRINITY_DN41959_c0_g1_i1	34.8539	8.3711	1.95503	3.25883	0.00111872	0.0289804	XP_018391131.1	-	-	-	-	-	-	-	-	-	-
TRINITY_DN17190_c1_g1_i2	34.8933	8.36955	1.75227	3.63503	0.000277951	0.00930547	-	-	-	-	-	-	-	-	-	-	-
TRINITY_DN6506_c0_g1_i2	34.7816	8.36594	1.7531	3.63126	0.000282044	0.00937951	EFQ96275.1	-	-	-	-	-	-	-	-	-	-
TRINITY_DN471455_c0_g1_i1	34.748	8.36574	1.78613	3.56398	0.000365278	0.0116139	KAB2110280.1	-	-	-	-	-	-	-	-	-	-
TRINITY_DN318785_c0_g1_i3	34.6867	8.36232	1.75831	3.61843	0.0002964	0.00975774	OWY57202.1	-	-	-	-	-	-	-	-	-	-
TRINITY_DN10823_c0_g1_i1	34.6419	8.3618	1.82139	3.49282	0.000477955	0.014345	-	-	-	-	-	-	-	-	-	-	-
TRINITY_DN18709_c0_g1_i2	34.5582	8.35824	1.81576	3.50169	0.000462314	0.0139684	XP_018390038.1	-	-	-	-	-	-	-	-	-	-
TRINITY_DN42022_c0_g1_i14	34.3406	8.34779	1.75996	3.60677	0.00031003	0.0101221	-	-	-	-	-	-	-	-	-	-	-
TRINITY_DN14693_c0_g2_i1	34.1006	8.3368	1.75609	3.60847	0.000308013	0.0100771	RYO06162.1	-	-	-	-	-	-	-	-	-	-
TRINITY_DN51826_c0_g1_i1	33.894	8.32936	1.77384	3.56817	0.00035949	0.0114877	XP_018383941.1	-	-	-	-	-	-	-	-	-	-
TRINITY_DN9786_c0_g2_i1	33.6764	8.31829	1.76276	3.58431	0.000337969	0.0108659	XP_018386486.1	-	-	-	-	-	-	-	-	-	-
TRINITY_DN18468_c0_g1_i1	33.509	8.31082	1.7682	3.56906	0.000358263	0.0114601	RII18929.1	-	-	-	-	-	-	-	-	-	-
TRINITY_DN944_c1_g1_i22	33.3581	8.30685	1.79745	3.50878	0.000450173	0.0136766	-	-	-	-	-	-	-	-	-	-	-
TRINITY_DN14952_c1_g1_i7	88.968	8.30079	1.57665	3.99632	6.4336e-05	0.00282389	-	-	-	-	-	-	-	-	-	-	-
TRINITY_DN420194_c0_g1_i1	33.1907	8.29939	1.78965	3.51989	0.000431723	0.0132481	XP_018381792.1	-	-	-	-	-	-	-	-	-	-
TRINITY_DN9475_c0_g2_i1	33.1517	8.29574	1.76607	3.56484	0.000364079	0.0115911	OWY47791.1	-	-	-	-	-	-	-	-	-	-
TRINITY_DN1408_c0_g1_i4	182.423	8.29344	1.14906	5.47705	4.32484e-08	5.06231e-06	OWY41580.1	-	-	-	-	-	-	-	-	Cc01_g08720	NAC
TRINITY_DN8583_c0_g1_i1	33.0736	8.29196	1.77177	3.55123	0.00038343	0.0120817	KAB2101444.1	-	-	-	-	-	-	-	-	-	-
TRINITY_DN1459_c0_g3_i1	1268.7	3.33695	0.407796	3.27849	0.00104365	0.0272965	XP_010937552.1	wall-associated receptor kinase-like 20 isoform X1	LOC105056890	Elaeis guineensis var. tenera (Oil palm)	ATP binding [GO:0005524]; polysaccharide binding [GO:0030247]; protein serine/threonine kinase activity [GO:0004674]	integral component of membrane [GO:0016021]	-	-	-	AA10G00404	WRKY
TRINITY_DN1421_c0_g3_i1	172.377	8.2789	1.15313	5.44507	5.17841e-08	5.86589e-06	AGN33443.1	Glycosyltransferase (EC 2.4.1.-)	-	Allium cepa (Onion)	UDP-glycosyltransferase activity [GO:0008194]	-	-	-	CG	-	-
TRINITY_DN14835_c0_g1_i1	334.308	8.28409	1.03163	6.0914	1.11925e-09	1.9543e-07	XP_009770048.1	glutathione S-transferase U17-like	LOC104220805	Nicotiana sylvestris (Wood tobacco) (South American tobacco)	transferase activity [GO:0016740]	-	glutathione metabolic process [GO:0006749]	-	-	-	-
TRINITY_DN5486_c1_g1_i4	32.7053	8.27404	1.90245	3.29788	0.000974193	0.0258509	-	-	-	-	-	-	-	-	-	-	-
TRINITY_DN6616_c0_g1_i1	168.139	8.27294	1.3209	4.74901	2.04419e-06	0.000154404	-	-	-	-	-	-	-	-	-	-	-
TRINITY_DN477203_c0_g1_i1	32.4873	8.26876	1.80844	3.46639	0.000527494	0.0156228	RYN92372.1	-	-	-	-	-	-	-	-	-	-
TRINITY_DN10656_c0_g1_i5	32.4148	8.26505	1.78864	3.50269	0.00046058	0.0139294	RYN52803.1	-	-	-	-	-	-	-	-	-	-
TRINITY_DN15842_c0_g1_i1	32.3702	8.26125	1.77369	3.53006	0.00041546	0.01287	RII24407.1	-	-	-	-	-	-	-	-	-	-
TRINITY_DN38294_c1_g1_i1	167.916	8.25944	1.24864	5.01302	5.35826e-07	4.79724e-05	OWY57648.1	-	-	-	-	-	-	-	-	-	-
TRINITY_DN21549_c0_g1_i1	32.0407	8.24913	1.83586	3.40392	0.000664255	0.018873	XP_028500549.1	-	-	-	-	-	-	-	-	-	-
TRINITY_DN25012_c0_g1_i1	31.9904	8.24751	1.98937	3.14044	0.00168693	0.0403892	-	-	-	-	-	-	-	-	-	-	-
TRINITY_DN14840_c0_g1_i1	24.6391	7.8668	1.87782	3.12425	0.00178257	0.0420735	XP_010923184.1	Glycosyltransferase (EC 2.4.1.-)	LOC105046323	Elaeis guineensis var. tenera (Oil palm)	UDP-glycosyltransferase activity [GO:0008194]	-	-	-	-	TRIUR3_17264-P1	GRAS
TRINITY_DN319255_c0_g1_i1	31.9236	8.24173	1.77499	3.51648	0.000437311	0.0133736	XP_018382593.1	-	-	-	-	-	-	-	-	-	-
TRINITY_DN14889_c0_g1_i2	131.549	5.61494	1.06137	3.40591	0.000659445	0.0188097	XP_010939776.1	L-ascorbate oxidase (EC 1.10.3.3)	LOC105058519	Elaeis guineensis var. tenera (Oil palm)	copper ion binding [GO:0005507]; L-ascorbate oxidase activity [GO:0008447]	extracellular region [GO:0005576]	-	-	-	Rsa1.0_03034.1_g00001.1	ERF	ERF048
TRINITY_DN72370_c0_g1_i2	31.6389	8.22985	1.78904	3.48224	0.000497242	0.0148533	XP_018380469.1	-	-	-	-	-	-	-	-	-	-
TRINITY_DN36144_c0_g1_i1	31.555	8.22775	2.00164	3.11133	0.00186246	0.043472	PSN67014.1	-	-	-	-	-	-	-	-	-	-
TRINITY_DN426763_c0_g1_i1	31.4045	8.21795	1.78009	3.49305	0.000477535	0.014345	RYN83951.1	-	-	-	-	-	-	-	-	-	-
TRINITY_DN23946_c0_g1_i1	84.1902	8.21551	1.51606	4.09979	4.13527e-05	0.00195746	-	-	-	-	-	-	-	-	-	-	-
TRINITY_DN40192_c0_g1_i1	31.2928	8.21392	1.79084	3.46984	0.000520777	0.0154396	RYN84305.1	-	-	-	-	-	-	-	-	-	-
TRINITY_DN421975_c0_g1_i1	31.1757	8.20603	1.80798	3.43258	0.000597872	0.0173032	KAB2107496.1	-	-	-	-	-	-	-	-	-	-
TRINITY_DN469646_c0_g1_i1	31.1366	8.20591	1.78283	3.48092	0.000499687	0.0149123	OWY44160.1	-	-	-	-	-	-	-	-	-	-
TRINITY_DN371983_c0_g1_i1	31.1477	8.20591	1.78349	3.47964	0.000502079	0.0149695	RYN24833.1	-	-	-	-	-	-	-	-	-	-
TRINITY_DN13701_c0_g1_i1	31.1086	8.20581	1.8042	3.43964	0.000582483	0.0169865	RAR10972.1	-	-	-	-	-	-	-	-	-	-
TRINITY_DN13552_c1_g1_i1	30.9467	8.1978	1.79279	3.45708	0.000546073	0.016054	XP_028505722.1	-	-	-	-	-	-	-	-	-	-
TRINITY_DN21131_c0_g1_i5	30.9355	8.19774	1.80491	3.43383	0.000595117	0.0172777	RYN32375.1	-	-	-	-	-	-	-	-	-	-
TRINITY_DN14596_c1_g2_i1	160.286	8.19208	1.24809	4.96125	7.00394e-07	6.06445e-05	XP_018383743.1	-	-	-	-	-	-	-	-	PH01001490G0340	MYB_related
TRINITY_DN7080_c0_g1_i2	30.824	8.18978	1.80674	3.42594	0.000612687	0.0176673	XP_008025496.1	-	-	-	-	-	-	-	-	-	-
TRINITY_DN35676_c0_g2_i1	30.7457	8.18941	1.83269	3.37724	0.000732182	0.0203571	XP_014551761.1	-	-	-	-	-	-	-	-	-	-
TRINITY_DN16782_c0_g1_i2	30.7289	8.18906	1.87046	3.30885	0.0009368	0.0250056	XP_028511645.1	-	-	-	-	-	-	-	-	-	-
TRINITY_DN3260_c2_g1_i2	30.7123	8.18562	1.78768	3.46014	0.000539887	0.0159018	-	-	-	-	-	-	-	-	-	-	-
TRINITY_DN420224_c0_g1_i1	30.6788	8.18556	1.80262	3.43143	0.000600398	0.0173604	XP_018383657.1	-	-	-	-	-	-	-	-	-	-
TRINITY_DN23769_c1_g1_i2	30.662	8.18538	1.82767	3.38429	0.000713614	0.0199408	RII19134.1	-	-	-	-	-	-	-	-	-	-
TRINITY_DN1801_c0_g2_i2	229.587	8.18225	1.35825	4.55162	5.32341e-06	0.000352707	-	-	-	-	-	-	-	-	-	-	-
TRINITY_DN42114_c0_g1_i2	81.108	8.18166	1.9093	3.23767	0.00120511	0.0306899	-	-	-	-	-	-	-	-	-	-	-
TRINITY_DN3295_c1_g1_i1	30.5671	8.18115	1.84448	3.35116	0.000804739	0.0220581	-	-	-	-	-	-	-	-	-	-	-
TRINITY_DN8698_c0_g2_i1	30.461	8.17658	1.89362	3.26178	0.00110716	0.0287753	KAB2103086.1	-	-	-	-	-	-	-	-	-	-
TRINITY_DN7410_c0_g1_i3	30.4444	8.1733	1.7894	3.44993	0.000560723	0.0164389	-	-	-	-	-	-	-	-	-	-	-
TRINITY_DN2510_c0_g1_i1	753.786	8.16906	0.784056	7.86814	3.59966e-15	1.60231e-12	XP_020268158.1	-	-	-	-	-	-	-	-	-	-
TRINITY_DN385603_c0_g1_i1	30.2935	8.16851	1.87839	3.28394	0.00102368	0.0268931	-	-	-	-	-	-	-	-	-	-	-
TRINITY_DN8654_c1_g1_i3	30.2044	8.16091	1.80146	3.41995	0.000626317	0.0180405	-	-	-	-	-	-	-	-	-	-	-
TRINITY_DN1216_c0_g2_i2	30.182	8.16088	1.79215	3.4377	0.000586683	0.017089	RYN98234.1	-	-	-	-	-	-	-	-	-	-
TRINITY_DN271540_c0_g1_i1	30.0983	8.15672	1.79302	3.43372	0.00059535	0.0172777	XP_018386688.1	-	-	-	-	-	-	-	-	-	-
TRINITY_DN46515_c0_g1_i1	30.0705	8.15313	1.87358	3.28415	0.0010229	0.0268931	XP_020274787.1	-	-	-	-	-	-	-	-	Aco003049.1	bZIP
TRINITY_DN3965_c0_g2_i1	29.9532	8.14844	1.81547	3.38669	0.000707412	0.0198025	-	-	-	-	-	-	-	-	-	-	-
TRINITY_DN12534_c1_g1_i2	29.8975	8.14477	1.87868	3.27078	0.0010725	0.0279895	XP_009385345.1	-	-	-	-	-	-	-	-	MDP0000320566	NAC
TRINITY_DN21324_c0_g1_i10	218955	8.14117	0.683298	8.98755	2.52807e-19	6.27959e-17	ACI31201.1	Pathogenesis-related protein	-	Lycoris radiata (Hurricane lily) (Red spiderlily)	ribonuclease activity [GO:0004540]	-	defense response to bacterium [GO:0042742]; defense response to fungus [GO:0050832]	-	-	-	-
TRINITY_DN12799_c0_g2_i1	29.6739	8.13892	1.92016	3.19709	0.0013882	0.0345453	XP_028505282.1	-	-	-	-	-	-	-	-	DCAR_026406	MYB_related
TRINITY_DN29005_c0_g1_i1	29.6573	8.13572	1.79809	3.41236	0.000644025	0.018403	XP_028511623.1	-	-	-	-	-	-	-	-	-	-
TRINITY_DN323187_c0_g1_i1	29.596	8.13151	1.80867	3.39006	0.000698776	0.0196303	XP_018382785.1	-	-	-	-	-	-	-	-	-	-
TRINITY_DN12640_c0_g1_i15	29.3726	8.1229	1.81941	3.36532	0.000764538	0.021121	PZD04097.1	-	-	-	-	-	-	-	-	-	-
TRINITY_DN14255_c1_g1_i3	293.799	8.11958	1.15687	5.28977	1.22468e-07	1.29447e-05	RDI83060.1	-	-	-	-	-	-	-	-	-	-
TRINITY_DN3111_c0_g1_i1	29.317	8.11603	1.9835	3.08345	0.00204617	0.0469965	KNG48557.1	-	-	-	-	-	-	-	-	-	-
TRINITY_DN21323_c0_g2_i2	29.2779	8.11479	1.86169	3.28455	0.00102147	0.0268931	XP_020268730.1	-	-	-	-	-	-	-	-	OPUNC10G09700.4	E2F/DP
TRINITY_DN40522_c1_g1_i1	29.1939	8.11429	1.82822	3.34439	0.00082464	0.0224672	RYN26723.1	-	-	-	-	-	-	-	-	-	-
TRINITY_DN431586_c0_g1_i1	29.1716	8.11392	1.8733	3.26372	0.0010996	0.0286494	XP_028501430.1	-	-	-	-	-	-	-	-	-	-
TRINITY_DN8941_c2_g1_i2	29.2221	8.11142	1.95488	3.12624	0.00177059	0.0419158	-	-	-	-	-	-	-	-	-	-	-
TRINITY_DN376438_c0_g1_i1	147.971	8.10667	1.44794	4.21749	2.47035e-05	0.00123533	RYN31210.1	-	-	-	-	-	-	-	-	-	-
TRINITY_DN21545_c0_g2_i1	29.088	8.10593	1.83311	3.33092	0.000865589	0.0233613	RII22006.1	-	-	-	-	-	-	-	-	-	-
TRINITY_DN323602_c0_g1_i1	29.0097	8.10554	1.84867	3.30267	0.000957679	0.0254554	KAB2103838.1	-	-	-	-	-	-	-	-	-	-
TRINITY_DN49922_c0_g1_i3	28.9985	8.10533	1.8737	3.25843	0.0011203	0.0289975	-	-	-	-	-	-	-	-	-	-	-
TRINITY_DN24436_c0_g5_i4	28.8423	8.09697	1.83886	3.31563	0.000914375	0.0244898	-	-	-	-	-	-	-	-	-	-	-
TRINITY_DN29515_c1_g2_i1	28.7919	8.09559	1.98176	3.07584	0.00209912	0.0480034	-	-	-	-	-	-	-	-	-	-	-
TRINITY_DN11449_c2_g1_i1	28.5407	8.08285	1.95046	3.11867	0.0018167	0.0425612	-	-	-	-	-	-	-	-	-	-	-
TRINITY_DN45579_c0_g1_i1	28.5353	8.07964	1.81054	3.35792	0.000785311	0.0216005	-	-	-	-	-	-	-	-	-	-	-
TRINITY_DN1211_c0_g1_i1	28.033	8.05305	1.8306	3.3066	0.000944372	0.0251864	XP_018385590.1	-	-	-	-	-	-	-	-	-	-
TRINITY_DN18218_c0_g1_i2	27.9603	8.05263	1.87655	3.22541	0.00125792	0.0318806	XP_020275768.1	-	-	-	-	-	-	-	-	-	-
TRINITY_DN470249_c0_g1_i1	27.8879	8.04448	1.88792	3.20166	0.00136638	0.0342114	XP_018388691.1	-	-	-	-	-	-	-	-	-	-
TRINITY_DN10975_c0_g1_i1	27.6981	8.03515	1.85537	3.25281	0.00114271	0.0293762	XP_018382081.1	-	-	-	-	-	-	-	-	-	-
TRINITY_DN17544_c0_g1_i2	27.6646	8.03497	1.82069	3.31466	0.00091755	0.0245494	RYN83973.1	-	-	-	-	-	-	-	-	-	-
TRINITY_DN17246_c0_g2_i3	27.5025	8.02938	1.95246	3.08809	0.0020145	0.0465011	OWY42920.1	-	-	-	-	-	-	-	-	-	-
TRINITY_DN272302_c0_g1_i1	1880.2	8.02627	0.485414	12.4147	2.17474e-35	1.14551e-31	XP_020260863.1	-	-	-	-	-	-	-	-	-	-
TRINITY_DN22768_c0_g3_i1	27.5027	8.02588	1.82878	3.29503	0.000984123	0.0260488	-	-	-	-	-	-	-	-	-	-	-
TRINITY_DN321064_c0_g1_i1	27.4859	8.02587	1.82263	3.30614	0.000945903	0.025206	RII21265.1	-	-	-	-	-	-	-	-	-	-
TRINITY_DN24788_c1_g1_i1	27.4579	8.02578	1.84559	3.26497	0.00109476	0.0285469	OWY41577.1	-	-	-	-	-	-	-	-	-	-
TRINITY_DN27630_c0_g1_i3	139.983	8.01708	1.38212	4.35353	1.33965e-05	0.000745395	-	-	-	-	-	-	-	-	-	-	-
TRINITY_DN32722_c0_g2_i1	27.352	8.01691	1.8641	3.22778	0.00124754	0.0316684	XP_018379119.1	-	-	-	-	-	-	-	-	-	-
TRINITY_DN6295_c1_g2_i6	27.352	8.01691	1.8641	3.22778	0.00124754	0.0316684	XP_018384561.1	-	-	-	-	-	-	-	-	TRIUR3_01525-P1	C2H2
TRINITY_DN17161_c0_g2_i1	27.3185	8.01671	1.8254	3.2961	0.000980383	0.0259933	OWY44097.1	-	-	-	-	-	-	-	-	-	-
TRINITY_DN35280_c0_g1_i1	27.1398	8.00749	1.82692	3.28832	0.00100788	0.0265885	XP_028500413.1	-	-	-	-	-	-	-	-	-	-
TRINITY_DN36390_c0_g1_i1	27.0171	7.99868	1.90032	3.15666	0.00159586	0.0387668	-	-	-	-	-	-	-	-	-	-	-
TRINITY_DN18822_c0_g1_i1	26.9612	7.99822	1.82965	3.27833	0.00104422	0.0272965	KAB2102692.1	-	-	-	-	-	-	-	-	-	-
TRINITY_DN12979_c0_g1_i1	136.83	7.98898	1.41598	4.22957	2.34134e-05	0.0011764	-	-	-	-	-	-	-	-	-	-	-
TRINITY_DN370599_c0_g1_i1	132.213	7.97978	1.74886	3.41925	0.000627942	0.0180405	OWY53051.1	-	-	-	-	-	-	-	-	-	-
TRINITY_DN3839_c0_g1_i1	26.6319	7.97949	1.83943	3.25073	0.0011511	0.0295048	RYN29615.1	-	-	-	-	-	-	-	-	-	-
TRINITY_DN424989_c0_g1_i1	26.5983	7.97945	1.84413	3.24242	0.00118521	0.0302807	KAE8843281.1	-	-	-	-	-	-	-	-	-	-
TRINITY_DN1535_c1_g5_i1	26.5648	7.97897	1.91016	3.13008	0.00174758	0.041558	-	-	-	-	-	-	-	-	-	-	-
TRINITY_DN2857_c0_g2_i1	26.4866	7.97445	1.88856	3.1635	0.00155885	0.0379785	XP_018381714.1	-	-	-	-	-	-	-	-	-	-
TRINITY_DN16901_c0_g1_i1	70.7204	7.971	1.61664	3.69345	0.000221229	0.00776859	XP_026389086.1	-	-	-	-	-	-	-	C	-	-
TRINITY_DN431427_c0_g1_i1	26.4253	7.97	1.84556	3.23478	0.00121736	0.0309522	RYO55917.1	-	-	-	-	-	-	-	-	-	-
TRINITY_DN370899_c0_g1_i1	26.3805	7.9692	1.94554	3.06815	0.0021539	0.0489725	RYN83027.1	-	-	-	-	-	-	-	-	-	-
TRINITY_DN403854_c0_g1_i1	26.3863	7.96537	1.86221	3.20338	0.00135824	0.0340952	-	-	-	-	-	-	-	-	-	-	-
TRINITY_DN325017_c0_g1_i1	26.2522	7.96048	1.84705	3.22703	0.00125084	0.0317268	RYN31149.1	-	-	-	-	-	-	-	-	-	-
TRINITY_DN15134_c0_g1_i4	993.436	4.49755	0.607866	4.10872	3.97863e-05	0.00189369	XP_020085631.1	organic cation/carnitine transporter 1	LOC109708331	Ananas comosus (Pineapple) (Ananas ananas)	transmembrane transporter activity [GO:0022857]	integral component of membrane [GO:0016021]	-	-	-	-	-
TRINITY_DN11525_c0_g1_i1	26.0456	7.95045	1.91202	3.11213	0.00185743	0.0433866	RYN28609.1	-	-	-	-	-	-	-	-	-	-
TRINITY_DN322744_c0_g1_i1	25.9675	7.94582	1.89088	3.14448	0.00166381	0.0399263	XP_018388093.1	-	-	-	-	-	-	-	-	-	-
TRINITY_DN323769_c0_g1_i1	25.867	7.94067	1.92905	3.07959	0.00207289	0.0474722	XP_017701724.1	-	-	-	-	-	-	-	-	PDK_30s853591g002	WRKY
TRINITY_DN7482_c0_g7_i1	25.7723	7.9316	1.86339	3.18323	0.00145644	0.0359544	-	-	-	-	-	-	-	-	-	-	-
TRINITY_DN16566_c0_g2_i2	25.7667	7.93157	1.85617	3.1956	0.00139542	0.0346705	RYN86023.1	-	-	-	-	-	-	-	-	-	-
TRINITY_DN6242_c1_g1_i2	25.694	7.93098	1.92967	3.07357	0.00211517	0.0482308	-	-	-	-	-	-	-	-	-	-	-
TRINITY_DN1745_c7_g1_i1	25.5267	7.9171	1.89685	3.11944	0.00181193	0.0425155	-	-	-	-	-	-	-	-	-	-	-
TRINITY_DN1370_c4_g1_i2	25.4094	7.91192	1.85318	3.19015	0.00142198	0.035275	-	-	-	-	-	-	-	-	-	-	-
TRINITY_DN220006_c0_g1_i1	25.3759	7.91186	1.86795	3.16489	0.0015514	0.037832	RYN41712.1	-	-	-	-	-	-	-	-	-	-
TRINITY_DN481022_c0_g1_i1	25.3479	7.91139	1.931	3.06132	0.00220367	0.0498888	-	-	-	-	-	-	-	-	-	-	-
TRINITY_DN1555_c0_g2_i27	130.249	7.90545	1.33308	4.42993	9.42634e-06	0.000558931	-	-	-	-	-	-	-	-	-	-	-
TRINITY_DN270417_c0_g1_i1	25.2532	7.90209	1.87592	3.14624	0.00165385	0.0397962	RII06258.1	-	-	-	-	-	-	-	-	-	-
TRINITY_DN370638_c0_g1_i1	25.1639	7.89708	1.87357	3.14752	0.00164664	0.0396747	XP_028505145.1	-	-	-	-	-	-	-	-	-	-
TRINITY_DN468886_c0_g1_i1	25.1359	7.89702	1.85438	3.18004	0.00147255	0.0362167	OWY58444.1	-	-	-	-	-	-	-	-	-	-
TRINITY_DN12791_c1_g2_i2	127.538	7.89645	1.50373	3.92121	8.81066e-05	0.00370282	-	-	-	-	-	-	-	-	-	-	-
TRINITY_DN20157_c0_g2_i1	25.0522	7.89201	1.85538	3.17564	0.00149505	0.0366561	XP_018390041.1	-	-	-	-	-	-	-	-	-	-
TRINITY_DN20408_c0_g1_i3	24.9237	7.88671	1.9096	3.08269	0.00205136	0.0470474	-	-	-	-	-	-	-	-	-	-	-
TRINITY_DN14744_c0_g2_i2	130.729	7.88243	1.16822	5.03536	4.76957e-07	4.30678e-05	-	-	-	-	-	-	-	-	-	-	-
TRINITY_DN473302_c0_g1_i1	24.9071	7.88207	1.8849	3.12063	0.00180466	0.0424363	KAB2105728.1	-	-	-	-	-	-	-	-	-	-
TRINITY_DN58676_c0_g1_i1	24.8847	7.88196	1.85943	3.16332	0.00155981	0.0379785	XP_028503560.1	-	-	-	-	-	-	-	-	-	-
TRINITY_DN20798_c0_g1_i1	24.6949	7.87183	1.86323	3.15144	0.0016247	0.0392862	XP_018384735.1	-	-	-	-	-	-	-	-	-	-
TRINITY_DN396101_c0_g1_i1	24.6949	7.87183	1.86323	3.15144	0.0016247	0.0392862	-	-	-	-	-	-	-	-	-	-	-
TRINITY_DN15394_c0_g1_i9	400.268	5.06371	0.439335	6.97351	3.09136e-12	8.4956e-10	PNX76222.1	ABC transporter C family member 10-like protein	L195_g032167	Trifolium pratense (Red clover)	ATPase-coupled transmembrane transporter activity [GO:0042626]; ATP binding [GO:0005524]	integral component of membrane [GO:0016021]	-	-	-	RrC2480_p5	HSF
TRINITY_DN28078_c0_g1_i1	24.6112	7.86675	1.86297	3.14913	0.00163755	0.0395063	RYN28054.1	-	-	-	-	-	-	-	-	-	-
TRINITY_DN14744_c0_g1_i2	128.887	7.86283	1.17277	4.99914	5.75873e-07	5.11233e-05	-	-	-	-	-	-	-	-	-	-	-
TRINITY_DN15301_c0_g2_i1	24.533	7.86164	1.8635	3.1455	0.00165801	0.0398478	XP_018383627.1	-	-	-	-	-	-	-	-	-	-
TRINITY_DN25901_c1_g1_i2	24.4773	7.8567	1.90277	3.07798	0.00208407	0.0476937	-	-	-	-	-	-	-	-	-	-	-
TRINITY_DN5476_c1_g1_i1	24.1758	7.84103	1.86991	3.12369	0.00178597	0.0420909	-	-	-	-	-	-	-	-	-	-	-
TRINITY_DN25778_c0_g2_i1	24.1869	7.84103	1.86939	3.12457	0.00178068	0.0420735	XP_028503621.1	-	-	-	-	-	-	-	-	-	-
TRINITY_DN15413_c0_g1_i1	63726.4	4.56162	0.306408	8.36015	6.26401e-17	3.80707e-14	XP_010914548.1	probable beta-D-xylosidase 2	LOC105039922	Elaeis guineensis var. tenera (Oil palm)	hydrolase activity, hydrolyzing O-glycosyl compounds [GO:0004553]	extracellular region [GO:0005576]	carbohydrate metabolic process [GO:0005975]	-	AD	-	-
TRINITY_DN45322_c0_g1_i1	24.0251	7.83064	1.8812	3.09943	0.00193895	0.0449585	XP_018387478.1	-	-	-	-	-	-	-	-	-	-
TRINITY_DN324004_c0_g1_i1	238.074	7.82538	1.22178	4.76794	1.86119e-06	0.000142372	XP_018389585.1	-	-	-	-	-	-	-	-	-	-
TRINITY_DN39656_c0_g1_i6	23.7683	7.81489	1.89111	3.07486	0.00210601	0.0480912	OWY48422.1	-	-	-	-	-	-	-	-	-	-
TRINITY_DN26736_c0_g2_i2	23.7404	7.81485	1.87711	3.09776	0.00194986	0.0451785	OWY41463.1	-	-	-	-	-	-	-	-	-	-
TRINITY_DN423380_c0_g1_i1	23.6454	7.80954	1.8845	3.08281	0.00205058	0.0470474	RYN88884.1	-	-	-	-	-	-	-	-	-	-
TRINITY_DN2290_c0_g1_i5	119.762	7.80559	1.50617	3.85453	0.000115953	0.0045922	-	-	-	-	-	-	-	-	-	-	-
TRINITY_DN2510_c0_g2_i1	767.473	7.80304	0.728131	7.96978	1.58961e-15	7.28089e-13	XP_020268158.1	-	-	-	-	-	-	-	-	-	-
TRINITY_DN49434_c0_g1_i5	62.5377	7.78845	1.60835	3.599	0.000319444	0.010344	XP_026664904.1	-	-	-	-	-	-	-	Q	-	-
TRINITY_DN5527_c0_g2_i1	61.7053	7.77989	1.74319	3.31569	0.000914171	0.0244898	-	-	-	-	-	-	-	-	-	-	-
TRINITY_DN16303_c0_g1_i1	295.613	7.77327	0.885747	6.51797	7.12674e-11	1.54269e-08	XP_008792286.1	-	-	-	-	-	-	-	-	-	-
TRINITY_DN13133_c0_g1_i1	61.8118	7.77083	1.55325	3.71532	0.000202947	0.00724737	XP_028511890.1	-	-	-	-	-	-	-	-	-	-
TRINITY_DN1547_c0_g1_i28	17262.6	4.80939	0.346243	8.11393	4.901e-16	2.45859e-13	AAC34856.1	Aspergillus nuclease S(1) (EC 3.1.30.1)	SA6	Hemerocallis sp. (Daylily)	endonuclease activity [GO:0004519]; metal ion binding [GO:0046872]; nucleic acid binding [GO:0003676]	-	DNA catabolic process [GO:0006308]	-	S	TRIUR3_03984-P1	TCP
TRINITY_DN11930_c1_g1_i2	110.438	7.65082	1.23644	4.57022	4.87218e-06	0.00032821	-	-	-	-	-	-	-	-	-	-	-
TRINITY_DN21756_c0_g2_i1	56.6149	7.64373	1.56628	3.60326	0.000314246	0.0102386	-	-	-	-	-	-	-	-	-	-	-
TRINITY_DN1623_c1_g2_i4	199.335	6.52058	0.915668	4.93692	7.9366e-07	6.74399e-05	PIN20480.1	Amino acid transporter protein	CDL12_06827	Handroanthus impetiginosus	-	integral component of membrane [GO:0016021]	amino acid transport [GO:0006865]	-	-	-	-
TRINITY_DN1625_c0_g1_i14	369.158	7.63049	0.834395	6.74799	1.49908e-11	3.67263e-09	KAA8529027.1	Pectinesterase (EC 3.1.1.11)	F0562_033485	Nyssa sinensis	aspartyl esterase activity [GO:0045330]; enzyme inhibitor activity [GO:0004857]; pectinesterase activity [GO:0030599]	cell wall [GO:0005618]; extracellular region [GO:0005576]	cell wall modification [GO:0042545]; pectin catabolic process [GO:0045490]	PATHWAY: Glycan metabolism. {ECO:0000256|ARBA:ARBA00004881}.; PATHWAY: Glycan metabolism; pectin degradation; 2-dehydro-3-deoxy-D-gluconate from pectin: step 1/5. {ECO:0000256|ARBA:ARBA00005184, ECO:0000256|RuleBase:RU000589}.	-	MDP0000320566	NAC
TRINITY_DN421643_c0_g1_i1	604.803	7.59709	0.760509	7.35966	1.84373e-13	6.19886e-11	XP_014073624.1	-	-	-	-	-	-	-	-	-	-
TRINITY_DN8338_c1_g1_i1	799.879	7.59499	0.6217	8.9995	2.26744e-19	1.93676e-16	-	-	-	-	-	-	-	-	-	-	-
TRINITY_DN14738_c0_g1_i1	122.91	7.59009	1.77877	3.14267	0.00167415	0.04013	XP_008812300.1	-	-	-	-	-	-	-	-	-	-
TRINITY_DN4897_c0_g1_i1	102.154	7.55587	1.34747	4.12318	3.73683e-05	0.00178937	XP_028500035.1	-	-	-	-	-	-	-	-	-	-
TRINITY_DN39621_c0_g1_i1	288.902	7.55358	1.22725	4.52521	6.03353e-06	0.000387569	XP_020255206.1	-	-	-	-	-	-	-	-	-	-
TRINITY_DN30284_c0_g1_i1	213.982	7.54645	1.01435	5.46799	4.55179e-08	5.2694e-06	XP_008799744.2	E3 ubiquitin-protein ligase PUB23-like	-	Phoenix dactylifera	-	-	-	-	-	-	-
TRINITY_DN127437_c0_g2_i1	200.843	7.53752	0.987027	5.6103	2.01971e-08	2.53297e-06	XP_018390817.1	-	-	-	-	-	-	-	-	-	-
TRINITY_DN25245_c2_g1_i1	101.239	7.52554	1.24108	4.4522	8.49936e-06	0.000513602	XP_028506430.1	-	-	-	-	-	-	-	-	-	-
TRINITY_DN23201_c0_g1_i2	99.6538	7.51799	1.33464	4.13444	3.55818e-05	0.00171161	RYN66966.1	-	-	-	-	-	-	-	-	-	-
TRINITY_DN1570_c0_g1_i6	510.629	7.49568	0.586557	9.36938	7.29598e-21	6.98734e-18	-	-	-	-	-	-	-	-	-	-	-
TRINITY_DN3098_c0_g1_i3	96.7458	7.45796	1.23152	4.43189	9.34099e-06	0.000554911	XP_018387320.1	-	-	-	-	-	-	-	-	-	-
TRINITY_DN273043_c0_g1_i1	92.4418	7.41227	1.35521	3.99368	6.50558e-05	0.00283981	KAB2105317.1	-	-	-	-	-	-	-	-	-	-
TRINITY_DN320221_c0_g1_i1	260.512	7.40209	1.21531	4.44503	8.78792e-06	0.000529016	XP_014074215.1	-	-	-	-	-	-	-	-	-	-
TRINITY_DN1275_c1_g1_i2	631.505	7.36032	0.847577	6.32428	2.54412e-10	5.02527e-08	XP_020250456.1	-	-	-	-	-	-	-	-	-	-
TRINITY_DN11678_c0_g1_i1	425.059	7.35455	0.856397	6.25241	4.04157e-10	7.63404e-08	XP_028509960.1	-	-	-	-	-	-	-	-	-	-
TRINITY_DN13845_c0_g1_i1	176.596	7.35067	0.995772	5.37339	7.72718e-08	8.49512e-06	-	-	-	-	-	-	-	-	-	-	-
TRINITY_DN1625_c1_g1_i9	1925.99	5.07683	0.817669	3.76292	0.000167938	0.00625147	ONK67062.1	Pectinesterase (EC 3.1.1.11)	A4U43_C06F15270	Asparagus officinalis (Garden asparagus)	aspartyl esterase activity [GO:0045330]; enzyme inhibitor activity [GO:0004857]; pectinesterase activity [GO:0030599]	cell wall [GO:0005618]; extracellular region [GO:0005576]	cell wall modification [GO:0042545]; pectin catabolic process [GO:0045490]	PATHWAY: Glycan metabolism. {ECO:0000256|ARBA:ARBA00004881}.; PATHWAY: Glycan metabolism; pectin degradation; 2-dehydro-3-deoxy-D-gluconate from pectin: step 1/5. {ECO:0000256|ARBA:ARBA00005184, ECO:0000256|RuleBase:RU000589}.	-	MDP0000320566	NAC
TRINITY_DN16482_c1_g1_i1	36.1713	8.42452	1.89083	3.39773	0.000679482	0.0191735	XP_010934019.2	LOW QUALITY PROTEIN: protein DMR6-LIKE OXYGENASE 2-like	LOC105054240	Elaeis guineensis var. tenera (Oil palm)	metal ion binding [GO:0046872]; oxidoreductase activity [GO:0016491]	-	-	-	-	Achn004841	NAC
TRINITY_DN1682_c0_g1_i2	97.526	7.31137	1.44549	3.67444	0.000238367	0.00821522	XP_028511663.1	-	-	-	-	-	-	-	-	-	-
TRINITY_DN219594_c0_g1_i1	80.6522	7.25907	1.70322	3.08772	0.00201698	0.0465011	RYN71309.1	-	-	-	-	-	-	-	-	676762620	B3
TRINITY_DN7586_c0_g1_i2	160.759	7.20589	0.94665	5.49928	3.81348e-08	4.54797e-06	-	-	-	-	-	-	-	-	-	-	-
TRINITY_DN3434_c0_g5_i1	236.231	7.20074	0.874025	5.95033	2.676e-09	4.12548e-07	XP_028505850.1	-	-	-	-	-	-	-	-	-	-
TRINITY_DN4909_c0_g1_i7	225.356	7.19115	1.21044	4.28863	1.79776e-05	0.000956505	XP_018391513.1	-	-	-	-	-	-	-	-	-	-
TRINITY_DN377803_c0_g1_i1	79.5031	7.17269	1.23219	4.19797	2.69314e-05	0.00133199	KAB2106892.1	-	-	-	-	-	-	-	-	-	-
TRINITY_DN7666_c2_g1_i2	508.18	7.16818	0.642195	8.04767	8.43858e-16	4.0408e-13	XP_020246500.1	-	-	-	-	-	-	-	-	-	-
TRINITY_DN6021_c0_g1_i5	77.6558	7.14514	1.28658	3.99907	6.35916e-05	0.00279909	-	-	-	-	-	-	-	-	-	-	-
TRINITY_DN387844_c0_g1_i1	161.776	7.13248	1.13895	4.50634	6.59565e-06	0.000415467	-	-	-	-	-	-	-	-	-	-	-
TRINITY_DN477_c1_g1_i7	1360.25	7.1156	0.665554	7.68623	1.51535e-14	5.98637e-12	XP_020274975.1	-	-	-	-	-	-	-	S	-	-
TRINITY_DN271251_c0_g1_i1	73.9206	7.10186	1.4509	3.51633	0.000437549	0.0133736	PSN66994.1	-	-	-	-	-	-	-	-	-	-
TRINITY_DN16482_c2_g1_i1	67.8577	6.76351	1.55334	3.06662	0.00216494	0.0491529	XP_010934019.2	LOW QUALITY PROTEIN: protein DMR6-LIKE OXYGENASE 2-like	LOC105054240	Elaeis guineensis var. tenera (Oil palm)	metal ion binding [GO:0046872]; oxidoreductase activity [GO:0016491]	-	-	-	-	-	-
TRINITY_DN49012_c0_g1_i2	74050.6	7.09129	0.714929	7.1214	1.06838e-12	3.09771e-10	XP_009411481.1	-	-	-	-	-	-	-	E	-	-
TRINITY_DN3447_c0_g1_i7	1076.64	7.0545	0.805845	6.2723	3.55762e-10	6.81424e-08	XP_008799813.1	-	-	-	-	-	-	-	-	Rsa1.0_03034.1_g00001.1	ERF	ERF048
TRINITY_DN20184_c0_g1_i1	72.8047	7.0475	1.24737	4.04653	5.19821e-05	0.00238439	XP_028500323.1	-	-	-	-	-	-	-	-	-	-
TRINITY_DN30706_c0_g1_i1	71.5492	7.04268	1.39738	3.60866	0.000307786	0.0100771	RYN45353.1	-	-	-	-	-	-	-	-	MDP0000284588	GeBP
TRINITY_DN2907_c0_g1_i1	71.8002	7.03055	1.28106	3.92688	8.60565e-05	0.003636	RYN87149.1	-	-	-	-	-	-	-	-	-	-
TRINITY_DN7774_c0_g1_i1	71.4877	7.02959	1.31709	3.81872	0.000134148	0.00518292	XP_028502814.1	-	-	-	-	-	-	-	-	-	-
TRINITY_DN159_c0_g1_i1	71.9562	7.0293	1.24274	4.04696	5.18878e-05	0.00238352	KAB2102699.1	-	-	-	-	-	-	-	-	-	-
TRINITY_DN423490_c0_g1_i1	69.2595	7.02732	1.60706	3.12828	0.00175835	0.0416885	RII22545.1	-	-	-	-	-	-	-	-	-	-
TRINITY_DN7004_c0_g1_i1	630.168	7.01757	0.505756	9.92092	3.37613e-23	3.95183e-20	KAB2107676.1	-	-	-	-	-	-	-	-	-	-
TRINITY_DN4000_c0_g1_i4	73.418	7.00574	1.29097	3.87749	0.000105538	0.00429271	-	-	-	-	-	-	-	-	-	-	-
TRINITY_DN382_c0_g1_i12	104.58	6.98892	1.04453	4.77624	1.786e-06	0.000138006	XP_018379059.1	-	-	-	-	-	-	-	-	-	-
TRINITY_DN3747_c0_g1_i1	48124.9	6.98262	0.464956	10.7163	8.53375e-27	1.68563e-23	XP_020250721.1	-	-	-	-	-	-	-	-	Thecc1EG029045t1	C2H2
TRINITY_DN2082_c0_g1_i1	66.4853	6.96949	1.61993	3.06773	0.00215694	0.0490063	-	-	-	-	-	-	-	-	-	-	-
TRINITY_DN17906_c0_g1_i1	66.3234	6.96218	1.58806	3.12468	0.00177999	0.0420735	XP_018381292.1	-	-	-	-	-	-	-	-	-	-
TRINITY_DN7760_c0_g1_i2	67.435	6.93971	1.28215	3.85267	0.000116838	0.00460993	-	-	-	-	-	-	-	-	-	-	-
TRINITY_DN1574_c0_g1_i1	67.4348	6.93678	1.25346	3.93853	8.19821e-05	0.00349186	XP_018379667.1	-	-	-	-	-	-	-	-	-	-
TRINITY_DN3326_c0_g1_i1	66.8541	6.93078	1.28701	3.83118	0.000127529	0.004971	-	-	-	-	-	-	-	-	-	-	-
TRINITY_DN168080_c0_g2_i1	1349.15	6.80719	0.786679	6.11074	9.91692e-10	1.76075e-07	AAA32641.1	Chitinase (EC 3.2.1.14) (Fragment)	chitinase	Allium sativum (Garlic)	chitinase activity [GO:0004568]; chitin binding [GO:0008061]	-	cell wall macromolecule catabolic process [GO:0016998]; chitin catabolic process [GO:0006032]; polysaccharide catabolic process [GO:0000272]	-	-	Peinf101Scf00562g09013.1	NAC
TRINITY_DN16931_c0_g1_i2	2098.26	3.61984	0.377878	4.28667	1.81369e-05	0.000958967	AEO62170.1	Beta-carotene hydroxylase	BCH	Narcissus tazetta subsp. chinensis	iron ion binding [GO:0005506]; oxidoreductase activity [GO:0016491]	integral component of membrane [GO:0016021]	lipid biosynthetic process [GO:0008610]	-	S	-	-
TRINITY_DN327865_c0_g1_i1	125.591	6.90635	1.27934	3.83506	0.000125533	0.004904	OWY56807.1	-	-	-	-	-	-	-	-	-	-
TRINITY_DN8360_c0_g1_i1	781.811	6.89561	0.838841	5.83616	5.34173e-09	7.88879e-07	-	-	-	-	-	-	-	-	-	-	-
TRINITY_DN2273_c0_g1_i1	63.8733	6.87038	1.32201	3.68408	0.000229527	0.00797402	-	-	-	-	-	-	-	-	-	-	-
TRINITY_DN16931_c0_g2_i2	2082.15	3.78035	0.346707	5.13504	2.82086e-07	2.718e-05	AEO62170.1	Beta-carotene hydroxylase	BCH	Narcissus tazetta subsp. chinensis	iron ion binding [GO:0005506]; oxidoreductase activity [GO:0016491]	integral component of membrane [GO:0016021]	lipid biosynthetic process [GO:0008610]	-	-	-	-
TRINITY_DN1136_c0_g1_i1	61.9974	6.86357	1.58258	3.0732	0.0021178	0.0482559	XP_020268379.1	-	-	-	-	-	-	-	K	PDK_30s1133891g002	HD-ZIP
TRINITY_DN4785_c0_g1_i1	446.853	6.8542	0.776452	6.25178	4.05809e-10	7.63404e-08	-	-	-	-	-	-	-	-	-	-	-
TRINITY_DN237104_c0_g1_i1	62.0366	6.85254	1.48868	3.25962	0.00111563	0.0289298	PSN67019.1	-	-	-	-	-	-	-	-	-	-
TRINITY_DN14469_c0_g1_i2	63.3378	6.84977	1.28915	3.762	0.000168561	0.00626729	RYO61998.1	-	-	-	-	-	-	-	-	-	-
TRINITY_DN4997_c0_g1_i3	62.5279	6.84907	1.38335	3.50531	0.000456082	0.0138198	RYO64854.1	-	-	-	-	-	-	-	-	-	-
TRINITY_DN171497_c0_g1_i1	16207.7	4.63111	0.52377	5.0234	5.07634e-07	4.55774e-05	RWR88664.1	Protein P21-like protein	CKAN_01769700	Cinnamomum micranthum f. kanehirae	-	-	-	-	O	-	-
TRINITY_DN1777_c0_g1_i5	594.308	4.17446	0.613117	3.54657	0.00039028	0.0122143	ONK65550.1	Protein DETOXIFICATION (Multidrug and toxic compound extrusion protein)	A4U43_C07F38250	Asparagus officinalis (Garden asparagus)	antiporter activity [GO:0015297]; xenobiotic transmembrane transporter activity [GO:0042910]	integral component of membrane [GO:0016021]	-	-	-	MDP0000242456	B3
TRINITY_DN17928_c0_g1_i1	4179.15	13.1117	2.30581	4.77566	1.7912e-06	0.000138071	XP_010931328.1	Peroxidase (EC 1.11.1.7)	LOC105052267	Elaeis guineensis var. tenera (Oil palm)	heme binding [GO:0020037]; metal ion binding [GO:0046872]; peroxidase activity [GO:0004601]	extracellular region [GO:0005576]	hydrogen peroxide catabolic process [GO:0042744]; response to oxidative stress [GO:0006979]	-	-	EPS67213.1	NAC
TRINITY_DN24102_c0_g1_i7	1765.22	6.83903	0.887017	5.45539	4.88644e-08	5.59533e-06	AGI98133.1	Cytochrome P450 CYP81	-	Narcissus tazetta (Cream narcissus)	heme binding [GO:0020037]; iron ion binding [GO:0005506]; monooxygenase activity [GO:0004497]; oxidoreductase activity, acting on paired donors, with incorporation or reduction of molecular oxygen [GO:0016705]	integral component of membrane [GO:0016021]	alkaloid metabolic process [GO:0009820]	PATHWAY: Alkaloid biosynthesis. {ECO:0000256|ARBA:ARBA00004913}.	-	Thecc1EG000515t1	B3
TRINITY_DN185704_c0_g1_i1	230.692	5.77603	0.97904	3.85687	0.00011485	0.00456569	BBH00145.1	S-adenosylmethionine decarboxylase	Prudu_010064	Prunus dulcis (Almond) (Amygdalus dulcis)	-	-	-	-	S	-	-
TRINITY_DN1554_c0_g1_i5	10467.7	6.82616	0.772554	6.24702	4.1836e-10	7.82358e-08	-	-	-	-	-	-	-	-	-	-	-
TRINITY_DN7863_c0_g1_i1	188.738	6.80902	0.903035	5.3254	1.00732e-07	1.08654e-05	XP_020268683.1	-	-	-	-	-	-	-	-	-	-
TRINITY_DN187553_c0_g1_i18	5934.7	3.80467	0.460613	3.91798	8.9294e-05	0.00374277	XP_019232921.1	Photosystem II 10 kDa polypeptide, chloroplastic	PSBR_0 A4A49_20557	Nicotiana attenuata (Coyote tobacco)	-	chloroplast thylakoid membrane [GO:0009535]; integral component of membrane [GO:0016021]; photosystem II oxygen evolving complex [GO:0009654]	photosynthesis [GO:0015979]	-	-	-	-
TRINITY_DN373645_c0_g1_i1	66.4626	6.78753	1.29499	3.69697	0.000218186	0.00770249	KAB2105943.1	-	-	-	-	-	-	-	-	-	-
TRINITY_DN18865_c0_g1_i1	97.9922	5.22244	0.831193	3.87688	0.000105805	0.00429801	RVW49747.1	15-hydroxyprostaglandin dehydrogenase	Hpgd CK203_069968	Vitis vinifera (Grape)	oxidoreductase activity [GO:0016491]	-	-	-	-	-	-
TRINITY_DN46698_c0_g1_i1	125.591	6.77122	1.0461	4.56096	5.09204e-06	0.000339512	RMZ67703.1	-	-	-	-	-	-	-	-	-	-
TRINITY_DN2026_c6_g1_i1	21787.1	3.44094	0.242257	5.94799	2.71458e-09	4.15337e-07	AAA32641.1	Chitinase (EC 3.2.1.14) (Fragment)	chitinase	Allium sativum (Garlic)	chitinase activity [GO:0004568]; chitin binding [GO:0008061]	-	cell wall macromolecule catabolic process [GO:0016998]; chitin catabolic process [GO:0006032]; polysaccharide catabolic process [GO:0000272]	-	-	-	-
TRINITY_DN5889_c0_g1_i8	1717.9	6.72693	0.460254	10.2703	9.59359e-25	1.51598e-21	-	-	-	-	-	-	-	-	-	-	-
TRINITY_DN9160_c0_g1_i2	63.772	6.72587	1.30057	3.63369	0.0002794	0.00932729	-	-	-	-	-	-	-	-	-	-	-
TRINITY_DN3785_c0_g4_i1	57.5211	6.71029	1.2825	3.67275	0.000239956	0.0082583	-	-	-	-	-	-	-	-	-	-	-
TRINITY_DN9519_c0_g1_i3	962.272	6.70123	0.834627	5.63273	1.77375e-08	2.30689e-06	XP_008781052.1	-	-	-	-	-	-	-	-	GSVIVT01019717001	ERF	ERF002
TRINITY_DN2176_c0_g1_i1	85.1653	6.69706	1.07794	4.35744	1.31591e-05	0.00073779	-	-	-	-	-	-	-	-	-	-	-
TRINITY_DN1742_c0_g1_i11	109.181	6.65071	0.981526	4.73824	2.15579e-06	0.000161833	RII07782.1	-	-	-	-	-	-	-	-	-	-
TRINITY_DN3119_c0_g1_i5	791.462	6.65064	0.519181	8.95764	3.31692e-19	2.75863e-16	-	-	-	-	-	-	-	-	-	FANhyb_rscf00000253.1.g00010.1	BBR-BPC
TRINITY_DN785_c0_g1_i3	107.428	6.62461	0.973011	4.75288	2.00536e-06	0.00015235	XP_018381681.1	-	-	-	-	-	-	-	-	-	-
TRINITY_DN217_c1_g1_i2	218.692	6.62308	0.807771	5.72326	1.04499e-08	1.44217e-06	XP_020252214.1	-	-	-	-	-	-	-	K	Manes.08G148000.1.p	NAC
TRINITY_DN475065_c0_g1_i1	688.428	6.59946	0.559763	8.21681	2.08988e-16	1.08276e-13	XP_018389093.1	-	-	-	-	-	-	-	-	-	-
TRINITY_DN1725_c0_g1_i2	99.9365	6.57848	1.31167	3.49058	0.000481965	0.0144516	-	-	-	-	-	-	-	-	-	-	-
TRINITY_DN10244_c0_g1_i1	57.2133	6.56879	1.29246	3.53495	0.00040785	0.0127117	XP_018379367.1	-	-	-	-	-	-	-	-	-	-
TRINITY_DN8403_c0_g1_i1	1371.48	6.56321	0.662236	6.8906	5.55561e-12	1.47546e-09	XP_008775242.1	-	-	-	-	-	-	-	-	-	-
TRINITY_DN2054_c0_g1_i2	3789.97	4.76769	0.572788	4.83196	1.35196e-06	0.000108171	ONK65304.1	Uncharacterized protein	A4U43_C07F35750	Asparagus officinalis (Garden asparagus)	transmembrane transporter activity [GO:0022857]	integral component of membrane [GO:0016021]	-	-	-	mrna00620.1-v1.0-hybrid	BBR-BPC
TRINITY_DN2153_c0_g1_i4	7832.27	4.51202	0.711713	3.52954	0.000416284	0.012873	AYM47547.1	Flavonoid 3'-hydroxylase	F3'H	Dracaena cambodiana	heme binding [GO:0020037]; iron ion binding [GO:0005506]; monooxygenase activity [GO:0004497]; oxidoreductase activity, acting on paired donors, with incorporation or reduction of molecular oxygen [GO:0016705]	integral component of membrane [GO:0016021]	-	-	-	Sme2.5_00297.1_g00019.1	MYB
TRINITY_DN43069_c0_g1_i2	49.9461	6.52767	1.4206	3.18715	0.00143681	0.0356148	-	-	-	-	-	-	-	-	-	-	-
TRINITY_DN219285_c0_g1_i2	12520.2	4.0352	0.381029	5.34134	9.22608e-08	1.00545e-05	RWR76103.1	Glucan endo-1,3-beta-glucosidase, basic vacuolar isoform-like protein	CKAN_00451700	Cinnamomum micranthum f. kanehirae	hydrolase activity, hydrolyzing O-glycosyl compounds [GO:0004553]	-	carbohydrate metabolic process [GO:0005975]	-	-	KZV46403.1	C2H2
TRINITY_DN2820_c5_g1_i1	121.537	6.51467	1.04612	4.31564	1.59138e-05	0.00086416	-	-	-	-	-	-	-	-	-	-	-
TRINITY_DN9960_c0_g1_i1	49.8684	6.51332	1.36769	3.29995	0.000967008	0.0256818	XP_018390293.1	-	-	-	-	-	-	-	-	-	-
TRINITY_DN9558_c0_g2_i1	318.458	6.50244	1.06857	4.21352	2.51417e-05	0.00125328	-	-	-	-	-	-	-	-	-	-	-
TRINITY_DN15986_c0_g1_i2	236.821	6.49082	0.814489	5.51366	3.51439e-08	4.20715e-06	RAQ99940.1	-	-	-	-	-	-	-	-	-	-
TRINITY_DN75411_c0_g2_i2	138.419	6.47749	1.18973	3.76346	0.000167578	0.00624543	-	-	-	-	-	-	-	-	-	Itr_sc004419.1_g00003.1	NAC
TRINITY_DN1228_c0_g1_i7	1655.71	6.47529	0.448116	9.98691	1.7391e-23	2.38968e-20	XP_020252449.1	-	-	-	-	-	-	-	-	TRIUR3_17264-P1	GRAS
TRINITY_DN5569_c0_g1_i2	135.308	6.47404	1.43202	3.1243	0.00178231	0.0420735	XP_018389990.1	-	-	-	-	-	-	-	-	-	-
TRINITY_DN2074_c0_g1_i5	19644.6	6.47379	0.599772	7.45916	8.70756e-14	3.16315e-11	XP_020261562.1	-	-	-	-	-	-	-	O	FANhyb_rscf00000253.1.g00010.1	BBR-BPC
TRINITY_DN38544_c0_g1_i1	47.7078	6.45722	1.39665	3.19136	0.00141607	0.0351558	XP_028508627.1	-	-	-	-	-	-	-	-	-	-
TRINITY_DN6296_c0_g1_i1	52.5132	6.43825	1.31431	3.37686	0.000733186	0.0203617	-	-	-	-	-	-	-	-	-	-	-
TRINITY_DN31430_c0_g4_i1	47.1722	6.43498	1.38643	3.19884	0.00137982	0.0344454	-	-	-	-	-	-	-	-	-	-	-
TRINITY_DN469051_c0_g1_i1	47.1329	6.43234	1.35251	3.27713	0.0010487	0.0273909	OWY42610.1	-	-	-	-	-	-	-	-	-	-
TRINITY_DN8386_c0_g2_i1	345.447	6.42089	0.956772	4.62063	3.82568e-06	0.000263988	RYN49787.1	-	-	-	-	-	-	-	-	-	-
TRINITY_DN22055_c0_g1_i1	344.693	6.84188	0.702468	6.89267	5.47547e-12	1.4665e-09	XP_002530075.1	Monoxygenase, putative (EC 1.14.13.90)	RCOM_0009570	Ricinus communis (Castor bean)	antheraxanthin epoxidase activity [GO:0052663]; FAD binding [GO:0071949]; zeaxanthin epoxidase [overall] activity [GO:0009540]; zeaxanthin epoxidase activity [GO:0052662]	-	-	-	C	-	-
TRINITY_DN16971_c0_g1_i2	155.326	6.41552	1.19295	3.70134	0.00021446	0.00760694	XP_020256870.1	-	-	-	-	-	-	-	-	EPS67213.1	NAC
TRINITY_DN31686_c0_g1_i1	176.139	6.41472	1.05201	4.19647	2.71112e-05	0.00133878	RII10844.1	-	-	-	-	-	-	-	-	-	-
TRINITY_DN2693_c0_g1_i3	46.2397	6.41058	1.39009	3.17288	0.00150937	0.0369213	RYN50177.1	-	-	-	-	-	-	-	-	-	-
TRINITY_DN5388_c0_g2_i1	91.5922	6.39848	1.00314	4.3847	1.16144e-05	0.00066137	XP_018390282.1	-	-	-	-	-	-	-	-	Potri.001G035800.1	MYB
TRINITY_DN43514_c0_g1_i5	272.923	6.38421	0.717604	6.10952	9.99342e-10	1.76443e-07	-	-	-	-	-	-	-	-	-	-	-
TRINITY_DN31981_c0_g1_i1	45.475	6.38281	1.36909	3.20126	0.00136828	0.0342114	RYN51636.1	-	-	-	-	-	-	-	-	-	-
TRINITY_DN27421_c0_g1_i2	214.062	6.37896	0.974978	4.49134	7.07759e-06	0.00044381	PSN67001.1	-	-	-	-	-	-	-	-	-	-
TRINITY_DN62234_c0_g2_i4	378.803	6.36996	0.526939	8.29311	1.10322e-16	6.0309e-14	-	-	-	-	-	-	-	-	S	-	-
TRINITY_DN10582_c0_g3_i1	44.8276	6.35527	1.33518	3.26194	0.00110652	0.0287753	XP_028504519.1	-	-	-	-	-	-	-	-	-	-
TRINITY_DN23803_c0_g1_i9	302.042	5.99072	1.02681	3.88653	0.000101686	0.0041735	BAC22638.1	Lachrymatory factor synthase	lfs	Allium fistulosum (Welsh onion)	-	-	-	-	-	-	-
TRINITY_DN6546_c0_g2_i1	93.1876	6.34005	0.956192	4.53889	5.65505e-06	0.000367886	KAB2111286.1	-	-	-	-	-	-	-	-	-	-
TRINITY_DN21768_c0_g1_i1	44.0851	6.33858	1.37603	3.15296	0.00161623	0.0391412	RYN55346.1	-	-	-	-	-	-	-	-	-	-
TRINITY_DN1551_c0_g2_i1	87.6624	6.33652	1.01206	4.28483	1.8288e-05	0.000963289	-	-	-	-	-	-	-	-	-	-	-
TRINITY_DN371452_c0_g1_i1	189.947	6.33302	1.40434	3.08545	0.00203247	0.0467838	-	-	-	-	-	-	-	-	-	-	-
TRINITY_DN685_c0_g3_i1	87.3052	6.33107	1.014	4.2713	1.9434e-05	0.00101502	PWO07947.1	-	-	-	-	-	-	-	-	-	-
TRINITY_DN12297_c0_g2_i4	382.823	6.32683	0.719864	6.01063	1.84809e-09	2.94985e-07	-	-	-	-	-	-	-	-	-	-	-
TRINITY_DN6253_c0_g2_i1	1603.92	6.32481	0.817247	5.29193	1.21034e-07	1.28361e-05	XP_028067124.1	-	-	-	-	-	-	-	-	-	-
TRINITY_DN476474_c0_g1_i1	43.6331	6.31642	1.34439	3.2107	0.00132411	0.0334173	XP_018385822.1	-	-	-	-	-	-	-	-	-	-
TRINITY_DN14515_c0_g2_i1	43.4097	6.31271	1.35746	3.17704	0.00148789	0.0365087	XP_028512121.1	-	-	-	-	-	-	-	-	-	-
TRINITY_DN13878_c0_g1_i1	69.652	6.31153	1.06363	4.05359	5.04365e-05	0.00232361	-	-	-	-	-	-	-	-	-	-	-
TRINITY_DN7115_c0_g1_i1	42.6116	6.28454	1.36729	3.1336	0.00172677	0.041187	XP_018388558.1	-	-	-	-	-	-	-	-	-	-
TRINITY_DN4930_c0_g1_i1	454.37	6.2838	0.943798	4.53889	5.65504e-06	0.000367886	XP_020250172.1	-	-	-	-	-	-	-	-	PEQU_14919	MYB
TRINITY_DN798_c0_g2_i2	140.931	6.27773	1.07978	3.96166	7.44314e-05	0.0031961	KAB2109156.1	-	-	-	-	-	-	-	-	-	-
TRINITY_DN51866_c0_g1_i2	42.3157	6.27277	1.34847	3.16861	0.00153172	0.03741	RII24363.1	-	-	-	-	-	-	-	-	-	-
TRINITY_DN43243_c0_g1_i1	130.541	6.26496	0.779384	5.47222	4.4444e-08	5.18305e-06	RYO14891.1	-	-	-	-	-	-	-	-	-	-
TRINITY_DN4381_c0_g1_i1	1120.09	6.25719	0.368447	11.5544	7.01278e-31	2.21632e-27	-	-	-	-	-	-	-	-	-	-	-
TRINITY_DN1294_c0_g1_i1	154.902	6.24965	0.737518	5.7621	8.30739e-09	1.17734e-06	-	-	-	-	-	-	-	-	-	-	-
TRINITY_DN7992_c0_g1_i3	539.961	6.24395	0.442407	9.59287	8.56691e-22	9.02496e-19	XP_020267578.1	-	-	-	-	-	-	-	-	-	-
TRINITY_DN36979_c0_g1_i7	1509.19	6.21665	0.499891	8.43514	3.30808e-17	2.09097e-14	-	-	-	-	-	-	-	-	-	-	-
TRINITY_DN3111_c0_g2_i1	416.451	6.21302	0.491075	8.57918	9.5552e-18	6.71072e-15	-	-	-	-	-	-	-	-	-	-	-
TRINITY_DN3334_c0_g1_i1	192.287	6.20719	0.889828	4.72809	2.26641e-06	0.000167746	-	-	-	-	-	-	-	-	-	-	-
TRINITY_DN3083_c0_g1_i10	584.266	6.18663	1.17416	3.56565	0.000362952	0.0115866	XP_018391527.1	-	-	-	-	-	-	-	-	-	-
TRINITY_DN271150_c0_g1_i1	308.207	6.18506	0.81675	5.12404	2.99052e-07	2.86402e-05	XP_028503382.1	-	-	-	-	-	-	-	-	-	-
TRINITY_DN6253_c0_g1_i1	1587.8	6.1807	0.743589	5.62233	1.88403e-08	2.41065e-06	XP_028067124.1	-	-	-	-	-	-	-	-	-	-
TRINITY_DN7604_c0_g3_i2	78.3015	6.17683	1.04103	4.01221	6.0152e-05	0.00267753	XP_028509075.1	-	-	-	-	-	-	-	-	MDP0000296109	MYB
TRINITY_DN2331_c0_g1_i5	115.359	6.17434	0.954403	4.37377	1.22122e-05	0.000690436	XP_018389175.1	-	-	-	-	-	-	-	-	-	-
TRINITY_DN8937_c0_g1_i1	840.15	6.16403	0.651126	6.39512	1.60423e-10	3.27097e-08	XP_009393283.1	-	-	-	-	-	-	-	C	-	-
TRINITY_DN11510_c0_g1_i1	217.047	6.13903	0.929068	4.45503	8.38813e-06	0.000507851	-	-	-	-	-	-	-	-	-	-	-
TRINITY_DN7020_c0_g1_i1	1095.45	6.13753	0.365862	11.309	1.18474e-29	3.40385e-26	XP_026781147.1	-	-	-	-	-	-	-	-	-	-
TRINITY_DN5334_c0_g1_i7	877.837	6.11737	0.901701	4.56622	4.96588e-06	0.000332503	-	-	-	-	-	-	-	-	-	-	-
TRINITY_DN219495_c0_g1_i1	80.2091	6.11492	1.10019	3.7402	0.000183871	0.00668816	XP_028511764.1	-	-	-	-	-	-	-	-	-	-
TRINITY_DN1612_c0_g4_i1	162.717	6.11133	0.905817	4.53881	5.65727e-06	0.000367886	XP_020246862.1	-	-	-	-	-	-	-	-	FANhyb_rscf00001203.1.g00002.1	LBD
TRINITY_DN12130_c0_g1_i2	73.3386	6.10826	1.18323	3.47206	0.000516479	0.0153266	KAB2111397.1	-	-	-	-	-	-	-	-	-	-
TRINITY_DN3203_c0_g1_i4	520.145	6.10368	0.91751	4.47263	7.72647e-06	0.000477347	XP_008788761.2	-	-	-	-	-	-	-	-	-	-
TRINITY_DN234981_c0_g1_i1	73.0874	6.10111	1.1702	3.50461	0.000457271	0.0138425	-	-	-	-	-	-	-	-	-	Zmw_sc00532.1.g00310.1	C2H2
TRINITY_DN19185_c0_g1_i1	106.389	6.09831	1.22956	3.33316	0.000858658	0.0232337	XP_020276585.1	ankyrin repeat domain-containing protein 65-like	-	-	-	-	-	-	-	Zpz_sc01105.1.g00140.1.sm.mk	FAR1
TRINITY_DN10425_c0_g2_i1	85.456	6.08093	1.11632	3.65569	0.000256489	0.00872662	RYN18294.1	-	-	-	-	-	-	-	-	-	-
TRINITY_DN409_c0_g1_i1	138.577	6.0804	1.16783	3.49401	0.000475829	0.0143084	KAB2109274.1	-	-	-	-	-	-	-	-	-	-
TRINITY_DN386690_c0_g1_i1	265.216	6.04715	1.06481	3.8008	0.000144229	0.00551173	-	-	-	-	-	-	-	-	-	-	-
TRINITY_DN2034_c1_g1_i2	71.1342	6.04698	1.10195	3.67255	0.00024014	0.0082583	KNG50967.1	-	-	-	-	-	-	-	-	-	-
TRINITY_DN2754_c0_g1_i2	88.4459	6.04118	0.990553	4.07972	4.50908e-05	0.00210806	RYN52200.1	-	-	-	-	-	-	-	-	-	-
TRINITY_DN1746_c0_g1_i1	102.42	6.03558	1.17657	3.42994	0.000603708	0.0174402	-	-	-	-	-	-	-	-	-	-	-
TRINITY_DN2390_c1_g1_i20	104808	3.50147	0.221734	6.77153	1.27429e-11	3.14631e-09	AAA32640.1	Chitinase (EC 3.2.1.14) (Fragment)	chitinase	Allium sativum (Garlic)	chitinase activity [GO:0004568]; chitin binding [GO:0008061]	-	cell wall macromolecule catabolic process [GO:0016998]; chitin catabolic process [GO:0006032]; polysaccharide catabolic process [GO:0000272]	-	-	-	-
TRINITY_DN26341_c1_g1_i1	85.3474	6.02391	1.1833	3.40057	0.000672453	0.0190261	RYN56978.1	-	-	-	-	-	-	-	-	-	-
TRINITY_DN24865_c0_g1_i11	100.024	6.00959	1.22053	3.28511	0.00101943	0.0268709	XP_018387077.1	-	-	-	-	-	-	-	-	-	-
TRINITY_DN22739_c0_g1_i1	209.73	5.99317	1.04237	3.83086	0.000127699	0.004971	XP_031090571.1	-	-	-	-	-	-	-	-	Zpz_sc00135.1.g00200.1.am.mk	Nin-like
TRINITY_DN24262_c0_g1_i2	51.4499	8.92807	1.78271	3.88626	0.0001018	0.0041735	XP_010905085.1	homeobox-leucine zipper protein HOX12	LOC105032348	Elaeis guineensis var. tenera (Oil palm)	DNA binding [GO:0003677]; DNA-binding transcription factor activity, RNA polymerase II-specific [GO:0000981]	nucleus [GO:0005634]	-	-	K	XP_010905085.1	HD-ZIP
TRINITY_DN3399_c0_g1_i1	68.544	5.98787	1.06973	3.7279	0.000193081	0.00695003	RII17451.1	-	-	-	-	-	-	-	-	-	-
TRINITY_DN6302_c0_g1_i1	446.965	5.98224	0.876315	4.5443	5.51172e-06	0.000361395	XP_020252455.1	-	-	-	-	-	-	-	-	GSMUA_Achr10P22520_001	TALE
TRINITY_DN376146_c0_g1_i1	357.148	5.96762	1.09974	3.60776	0.000308847	0.0100939	XP_021674385.1	-	-	-	-	-	-	-	-	SapurV1A.0036s0830.1.p	AP2	WRI1
TRINITY_DN12735_c0_g1_i1	181.93	5.9517	0.661011	5.97827	2.25517e-09	3.5459e-07	AGI98130.1	9-cis-epoxycarotenoid dioxygenase	-	Narcissus tazetta (Cream narcissus)	metal ion binding [GO:0046872]; oxidoreductase activity, acting on single donors with incorporation of molecular oxygen, incorporation of two atoms of oxygen [GO:0016702]	-	-	-	-	-	-
TRINITY_DN16874_c0_g2_i1	71.5631	5.9512	0.963785	4.09967	4.13739e-05	0.00195746	-	-	-	-	-	-	-	-	-	-	-
TRINITY_DN41115_c0_g1_i5	66.2887	5.94828	1.11409	3.54395	0.000394177	0.0123099	RMZ67515.1	-	-	-	-	-	-	-	-	-	-
TRINITY_DN5869_c0_g1_i1	127.668	5.94699	0.928153	4.25253	2.11371e-05	0.00107825	-	-	-	-	-	-	-	-	-	-	-
TRINITY_DN15781_c0_g1_i1	405.883	5.92885	0.650595	6.03886	1.55208e-09	2.59534e-07	XP_020252682.1	-	-	-	-	-	-	-	-	676709864	STAT
TRINITY_DN5889_c1_g1_i7	4102.66	5.91977	0.55784	7.02669	2.11492e-12	5.91504e-10	-	-	-	-	-	-	-	-	-	-	-
TRINITY_DN229788_c0_g1_i1	298.455	5.91212	0.627739	6.23207	4.60303e-10	8.50726e-08	-	-	-	-	-	-	-	-	-	XP_010922390.1	C2H2
TRINITY_DN25328_c0_g1_i1	1496.49	3.1161	0.325496	3.42892	0.000605983	0.01749	ONK63574.1	Xylose isomerase (EC 5.3.1.5)	A4U43_C07F16660	Asparagus officinalis (Garden asparagus)	metal ion binding [GO:0046872]; xylose isomerase activity [GO:0009045]	integral component of membrane [GO:0016021]	D-xylose metabolic process [GO:0042732]	-	-	-	-
TRINITY_DN25545_c0_g1_i1	268.368	7.09907	0.732821	6.95815	3.44778e-12	9.31312e-10	ONK58695.1	Uncharacterized protein	A4U43_C09F15720	Asparagus officinalis (Garden asparagus)	-	-	-	-	-	-	-
TRINITY_DN780_c0_g1_i1	68.2971	5.87695	1.16599	3.32502	0.000884127	0.0238006	OWY42626.1	-	-	-	-	-	-	-	-	-	-
TRINITY_DN9969_c0_g1_i3	67.8847	5.86997	1.01484	3.81338	0.00013708	0.00527683	KNG48999.1	-	-	-	-	-	-	-	-	-	-
TRINITY_DN43370_c0_g1_i4	96.9534	5.84135	1.04278	3.68376	0.000229821	0.00797402	XP_018385471.1	-	-	-	-	-	-	-	-	-	-
TRINITY_DN25754_c0_g1_i1	378.282	6.03235	0.600987	6.70954	1.95239e-11	4.70589e-09	EYU24929.1	Pectinesterase (EC 3.1.1.11) (Fragment)	MIMGU_mgv1a025888mg	Erythranthe guttata (Yellow monkey flower) (Mimulus guttatus)	aspartyl esterase activity [GO:0045330]; pectinesterase activity [GO:0030599]; pectinesterase inhibitor activity [GO:0046910]	cell wall [GO:0005618]; extracellular region [GO:0005576]	cell wall modification [GO:0042545]; pectin catabolic process [GO:0045490]	PATHWAY: Glycan metabolism. {ECO:0000256|ARBA:ARBA00004881}.; PATHWAY: Glycan metabolism; pectin degradation; 2-dehydro-3-deoxy-D-gluconate from pectin: step 1/5. {ECO:0000256|ARBA:ARBA00005184, ECO:0000256|RuleBase:RU000589}.	-	MDP0000320566	NAC
TRINITY_DN31029_c4_g1_i1	66.0925	5.83503	0.991664	3.86727	0.000110061	0.0044254	-	-	-	-	-	-	-	-	-	-	-
TRINITY_DN75009_c1_g1_i1	104.107	5.83428	1.07708	3.55989	0.000371016	0.0117507	-	-	-	-	-	-	-	-	S	-	-
TRINITY_DN270556_c0_g1_i1	162.807	5.82915	0.671956	5.69851	1.20858e-08	1.63932e-06	AUR26472.1	NAC2716 (Fragment)	-	Narcissus tazetta subsp. chinensis	DNA binding [GO:0003677]	-	regulation of transcription, DNA-templated [GO:0006355]	-	-	XP_010921292.1	NAC
TRINITY_DN6965_c0_g2_i1	59.7803	5.79522	1.11547	3.40236	0.000668072	0.0189531	RII07815.1	-	-	-	-	-	-	-	-	-	-
TRINITY_DN4196_c0_g1_i13	282.674	5.7809	0.722849	5.23056	1.68999e-07	1.70097e-05	-	-	-	-	-	-	-	-	-	-	-
TRINITY_DN2616_c0_g1_i5	1050.47	5.89448	0.935411	4.16339	3.13556e-05	0.00152456	OIW16660.1	4HBT domain-containing protein	TanjilG_30793	Lupinus angustifolius (Narrow-leaved blue lupine)	-	-	-	-	S	-	-
TRINITY_DN370159_c0_g1_i1	126.586	5.76905	0.725936	5.19199	2.0806e-07	2.04845e-05	XP_018385033.1	-	-	-	-	-	-	-	-	-	-
TRINITY_DN228_c0_g2_i1	57.4079	5.73661	1.11722	3.34456	0.000824122	0.0224672	XP_018387837.1	-	-	-	-	-	-	-	-	-	-
TRINITY_DN33892_c0_g1_i1	61.0855	5.71858	0.987429	3.76592	0.000165934	0.00619914	-	-	-	-	-	-	-	-	-	-	-
TRINITY_DN15649_c0_g1_i3	168.034	5.68551	0.866381	4.25391	2.10069e-05	0.00107427	XP_019172539.1	-	-	-	-	-	-	-	-	-	-
TRINITY_DN2456_c0_g2_i1	59.7232	5.68019	1.16143	3.16867	0.00153136	0.03741	RYN35458.1	-	-	-	-	-	-	-	-	-	-
TRINITY_DN16534_c0_g2_i1	59.5725	5.67797	1.12046	3.28255	0.00102872	0.0269583	XP_018381486.1	-	-	-	-	-	-	-	-	-	-
TRINITY_DN423807_c0_g1_i1	155.31	5.65874	1.00127	3.6541	0.000258082	0.00876092	XP_018383067.1	-	-	-	-	-	-	-	-	-	-
TRINITY_DN3743_c0_g1_i1	263.681	5.65673	1.12153	3.26048	0.00111223	0.0288831	XP_020261547.1	-	-	-	-	-	-	-	-	-	-
TRINITY_DN53078_c0_g1_i11	1925.39	5.65438	0.408999	8.93493	4.07425e-19	3.30161e-16	XP_009386178.1	-	-	-	-	-	-	-	-	-	-
TRINITY_DN274391_c0_g1_i1	147.69	6.34512	1.15032	3.77732	0.000158526	0.00598575	XP_010922560.1	probable 2-oxoglutarate-dependent dioxygenase At3g111800	LOC105045837	Elaeis guineensis var. tenera (Oil palm)	dioxygenase activity [GO:0051213]; metal ion binding [GO:0046872]	-	-	-	-	676709864	STAT
TRINITY_DN6140_c0_g1_i1	53.9916	5.65042	1.13655	3.21184	0.0013189	0.0333459	OWY46043.1	-	-	-	-	-	-	-	-	-	-
TRINITY_DN2843_c1_g2_i1	1571.06	6.41652	0.737446	5.98894	2.11212e-09	3.33757e-07	XP_010271268.1	Pectinesterase (EC 3.1.1.11)	LOC104607345	Nelumbo nucifera (Sacred lotus)	aspartyl esterase activity [GO:0045330]; pectinesterase activity [GO:0030599]; pectinesterase inhibitor activity [GO:0046910]	cell wall [GO:0005618]; extracellular region [GO:0005576]	cell wall modification [GO:0042545]; pectin catabolic process [GO:0045490]	PATHWAY: Glycan metabolism. {ECO:0000256|ARBA:ARBA00004881}.; PATHWAY: Glycan metabolism; pectin degradation; 2-dehydro-3-deoxy-D-gluconate from pectin: step 1/5. {ECO:0000256|ARBA:ARBA00005184, ECO:0000256|RuleBase:RU000589}.	-	MDP0000320566	NAC
TRINITY_DN8127_c0_g2_i3	164.816	5.64631	0.721772	5.05189	4.37453e-07	3.99574e-05	RAR12855.1	-	-	-	-	-	-	-	-	-	-
TRINITY_DN1065_c0_g2_i1	89.1718	5.63986	0.857088	4.24678	2.16866e-05	0.00110013	XP_008780533.1	-	-	-	-	-	-	-	-	Achn158001	bHLH
TRINITY_DN10401_c0_g2_i5	136.918	5.63752	0.817583	4.44911	8.62266e-06	0.000520058	XP_020245410.1	-	-	-	-	-	-	-	Q	Csa09g009740.1	HSF
TRINITY_DN28511_c0_g1_i1	2200.92	4.27353	0.41209	5.51707	3.44703e-08	4.14221e-06	XP_002273742.2	Xyloglucan endotransglucosylase/hydrolase (EC 2.4.1.207)	VIT_11s0052g01200	Vitis vinifera (Grape)	hydrolase activity, hydrolyzing O-glycosyl compounds [GO:0004553]; xyloglucan:xyloglucosyl transferase activity [GO:0016762]	apoplast [GO:0048046]; cell wall [GO:0005618]	cell wall biogenesis [GO:0042546]; cell wall organization [GO:0071555]; xyloglucan metabolic process [GO:0010411]	-	-	Cotton_A_39858_BGI-A2_v1.0	ERF	ERF71
TRINITY_DN370487_c0_g1_i1	77.3839	5.62252	1.14368	3.16743	0.00153795	0.0375331	KAB2109933.1	-	-	-	-	-	-	-	-	-	-
TRINITY_DN17806_c0_g1_i1	101.548	5.62077	1.15502	3.13481	0.00171968	0.041049	OAK99983.1	-	-	-	-	-	-	-	-	-	-
TRINITY_DN441_c0_g1_i1	78.1658	5.61743	1.0311	3.50833	0.000450926	0.0136766	XP_018383798.1	-	-	-	-	-	-	-	-	-	-
TRINITY_DN28615_c1_g1_i1	5144.59	3.3381	0.294568	4.54257	5.55734e-06	0.000363632	XP_010909762.1	sialyltransferase-like protein 1	LOC105035767	Elaeis guineensis var. tenera (Oil palm)	sialyltransferase activity [GO:0008373]	Golgi membrane [GO:0000139]; integral component of membrane [GO:0016021]	protein glycosylation [GO:0006486]	-	-	-	-
TRINITY_DN3820_c0_g2_i2	77.5348	5.61323	1.06876	3.38075	0.000722874	0.0201639	OWY41269.1	-	-	-	-	-	-	-	-	-	-
TRINITY_DN1218_c0_g1_i1	55.855	5.58364	1.10635	3.23915	0.00119885	0.0305552	XP_028503573.1	-	-	-	-	-	-	-	-	-	-
TRINITY_DN10910_c1_g1_i1	2018.47	5.57457	0.509115	7.02115	2.20048e-12	6.10034e-10	XP_020254563.1	-	-	-	-	-	-	-	K	XP_010922870.1	NAC
TRINITY_DN29_c1_g1_i1	3667.37	5.5401	0.47883	7.39323	1.43308e-13	5.03236e-11	BAC22639.1	Lachrymatory factor synthase	lfs	Allium chinense	-	-	-	-	-	-	-
TRINITY_DN1521_c1_g1_i2	999.099	5.55117	0.918715	3.86537	0.000110921	0.00444867	XP_029119354.1	-	-	-	-	-	-	-	-	-	-
TRINITY_DN2901_c0_g1_i5	668.219	5.52987	0.58309	6.05374	1.41522e-09	2.3918e-07	XP_010916697.1	Protein DETOXIFICATION (Multidrug and toxic compound extrusion protein)	LOC105041422	Elaeis guineensis var. tenera (Oil palm)	antiporter activity [GO:0015297]; xenobiotic transmembrane transporter activity [GO:0042910]	integral component of membrane [GO:0016021]	-	-	-	TRIUR3_11943-P1	ERF	ERF071
TRINITY_DN4867_c0_g1_i9	1960.64	5.53266	0.454564	7.77153	7.7541e-15	3.22448e-12	-	-	-	-	-	-	-	-	-	-	-
TRINITY_DN377834_c0_g1_i1	96.4678	5.53175	1.0545	3.34921	0.000810418	0.0221561	RII04549.1	-	-	-	-	-	-	-	-	-	-
TRINITY_DN2927_c1_g1_i1	719.603	4.80308	0.827244	3.38845	0.000702887	0.0196933	BAD06448.1	Alliinase-like	ALL1	Allium cepa (Onion)	carbon-sulfur lyase activity [GO:0016846]	-	-	-	-	-	-
TRINITY_DN1465_c0_g1_i1	72.8183	5.52136	1.08261	3.25266	0.0011433	0.0293762	XP_028511689.1	-	-	-	-	-	-	-	-	-	-
TRINITY_DN3474_c0_g1_i1	256.381	5.50528	0.537874	6.51691	7.17692e-11	1.54299e-08	RYN38731.1	-	-	-	-	-	-	-	-	-	-
TRINITY_DN31768_c0_g1_i1	422.994	5.48705	0.587944	5.93092	3.01241e-09	4.53353e-07	XP_008784385.1	-	-	-	-	-	-	-	-	XP_010916103.1	WRKY
TRINITY_DN13302_c0_g1_i2	144.814	5.47398	0.848219	4.09562	4.21038e-05	0.00198308	RYN90199.1	-	-	-	-	-	-	-	-	-	-
TRINITY_DN698_c0_g1_i4	113.307	5.46548	1.12221	3.0881	0.00201443	0.0465011	-	-	-	-	-	-	-	-	-	-	-
TRINITY_DN29422_c0_g2_i15	79925.1	3.76441	0.39092	4.51347	6.37768e-06	0.000404739	XP_010921891.1	glucan endo-1,3-beta-glucosidase	LOC105045344	Elaeis guineensis var. tenera (Oil palm)	hydrolase activity, hydrolyzing O-glycosyl compounds [GO:0004553]	-	carbohydrate metabolic process [GO:0005975]	-	-	Itr_sc004833.1_g00001.1	FAR1
TRINITY_DN1290_c0_g1_i5	966.297	5.46525	0.808391	4.28661	1.81424e-05	0.000958967	-	-	-	-	-	-	-	-	-	-	-
TRINITY_DN5964_c0_g1_i1	69.5192	5.45076	1.06239	3.24811	0.00116173	0.029729	XP_018388358.1	-	-	-	-	-	-	-	-	-	-
TRINITY_DN1688_c11_g1_i1	125.066	5.44441	0.862883	3.99174	6.55892e-05	0.00285915	-	-	-	-	-	-	-	-	-	-	-
TRINITY_DN2890_c0_g1_i7	889.405	5.44248	0.743012	4.63313	3.6017e-06	0.000250666	XP_020182700.1	-	-	-	-	-	-	-	-	-	-
TRINITY_DN5959_c1_g4_i1	656.727	5.43461	0.725399	4.73479	2.19284e-06	0.000163727	-	-	-	-	-	-	-	-	-	-	-
TRINITY_DN7831_c0_g2_i1	50.6753	5.43417	1.11887	3.06932	0.00214544	0.0488154	KNG48477.1	-	-	-	-	-	-	-	-	-	-
TRINITY_DN2141_c0_g2_i1	214.115	5.43139	0.679159	5.05241	4.36267e-07	3.99574e-05	RYN47364.1	-	-	-	-	-	-	-	-	-	-
TRINITY_DN6776_c0_g1_i1	2911.88	5.43013	0.730464	4.69582	2.65542e-06	0.00019219	XP_020255180.1	-	-	-	-	-	-	-	-	RrC12045_p1	G2-like
TRINITY_DN12159_c0_g1_i12	733.25	5.41624	0.452734	7.5458	4.49518e-14	1.69126e-11	-	-	-	-	-	-	-	-	-	-	-
TRINITY_DN30617_c1_g1_i1	91.7964	9.76636	1.58584	4.89733	9.71486e-07	8.12245e-05	CAN77092.1	Pectinesterase (EC 3.1.1.11)	VITISV_026596	Vitis vinifera (Grape)	aspartyl esterase activity [GO:0045330]; enzyme inhibitor activity [GO:0004857]; pectinesterase activity [GO:0030599]	cell wall [GO:0005618]; extracellular region [GO:0005576]	cell wall modification [GO:0042545]; pectin catabolic process [GO:0045490]	PATHWAY: Glycan metabolism. {ECO:0000256|ARBA:ARBA00004881}.; PATHWAY: Glycan metabolism; pectin degradation; 2-dehydro-3-deoxy-D-gluconate from pectin: step 1/5. {ECO:0000256|ARBA:ARBA00005184, ECO:0000256|RuleBase:RU000589}.	-	MDP0000320566	NAC
TRINITY_DN44482_c0_g1_i2	147.44	5.37998	0.763158	4.42893	9.47013e-06	0.000560476	XP_009411481.1	-	-	-	-	-	-	-	-	-	-
TRINITY_DN331_c0_g1_i1	136.056	5.37421	0.783713	4.30542	1.6667e-05	0.000897347	RYN70924.1	-	-	-	-	-	-	-	-	-	-
TRINITY_DN15790_c0_g1_i2	125.636	5.3666	1.09917	3.06285	0.00219237	0.0497043	XP_020588195.1	-	-	-	-	-	-	-	-	Lus10043264	YABBY
TRINITY_DN6333_c1_g2_i5	2199.66	5.36098	0.92031	3.65201	0.000260199	0.00882333	XP_008802361.1	phospholipase A	-	Phoenix dactylifera	-	-	-	-	-	Gh_D08G2402	AP2	BBM
TRINITY_DN273022_c0_g1_i1	64.8303	5.35126	1.08403	3.09149	0.00199154	0.046043	KAB2110645.1	-	-	-	-	-	-	-	-	-	-
TRINITY_DN943_c0_g4_i1	3521.74	5.34624	0.41919	7.98264	1.43235e-15	6.7564e-13	XP_020268724.1	-	-	-	-	-	-	-	-	-	-
TRINITY_DN2034_c2_g1_i1	261.924	5.33396	0.861232	3.87115	0.000108322	0.00437438	KAB2110131.1	-	-	-	-	-	-	-	-	-	-
TRINITY_DN3206_c0_g2_i1	93.3267	5.31958	1.05469	3.14744	0.00164705	0.0396747	OWY42903.1	-	-	-	-	-	-	-	-	-	-
TRINITY_DN5034_c0_g1_i20	182.339	5.31232	0.711247	4.65706	3.2075e-06	0.000226778	-	-	-	-	-	-	-	-	CG	-	-
TRINITY_DN3081_c0_g2_i2	487.862	5.04855	0.61758	4.93629	7.96247e-07	6.74654e-05	AIZ68191.1	Lipid phosphate phosphatase 2-like isoform X1	PPase-6	Albuca bracteata (False sea onion) (Ornithogalum longebracteatum)	lipid phosphatase activity [GO:0042577]	integral component of membrane [GO:0016021]	phospholipid metabolic process [GO:0006644]	-	I	-	-
TRINITY_DN668_c0_g1_i2	203.146	5.30752	0.554351	5.96647	2.42436e-09	3.77435e-07	XP_028500612.1	-	-	-	-	-	-	-	-	-	-
TRINITY_DN12018_c0_g2_i1	67.3636	5.29842	0.881893	3.74016	0.000183901	0.00668816	XP_018386481.1	-	-	-	-	-	-	-	-	-	-
TRINITY_DN12202_c0_g1_i7	98.2553	5.29124	0.833225	3.95	7.81497e-05	0.00335121	-	-	-	-	-	-	-	-	-	-	-
TRINITY_DN5866_c0_g1_i6	203.274	5.27944	0.545224	6.01484	1.8006e-09	2.90337e-07	OWY51277.1	-	-	-	-	-	-	-	-	-	-
TRINITY_DN30810_c0_g2_i2	85227.9	4.76785	0.517422	5.34931	8.82888e-08	9.65495e-06	XP_021802092.1	protein P21-like	LOC110746189	Prunus avium (Cherry) (Cerasus avium)	-	extracellular region [GO:0005576]	-	-	-	-	-
TRINITY_DN25878_c0_g1_i2	135.212	5.26104	0.668775	4.87615	1.08178e-06	8.94989e-05	XP_018383888.1	-	-	-	-	-	-	-	-	-	-
TRINITY_DN3256_c0_g1_i1	1296.27	5.25572	0.728226	4.47075	7.79448e-06	0.000480093	-	-	-	-	-	-	-	-	-	-	-
TRINITY_DN8520_c0_g2_i2	14458.1	5.25314	0.585056	5.5604	2.69164e-08	3.29716e-06	XP_020270102.1	-	-	-	-	-	-	-	-	PH01000046G0930	WRKY
TRINITY_DN4599_c0_g2_i1	145.012	5.24795	0.905369	3.58744	0.000333947	0.0107694	-	-	-	-	-	-	-	-	-	-	-
TRINITY_DN31265_c1_g1_i3	832.293	4.73471	0.517447	5.285	1.25706e-07	1.3155e-05	KZM84032.1	Aa_trans domain-containing protein	DCAR_028546	Daucus carota subsp. sativus (Carrot)	-	integral component of membrane [GO:0016021]	amino acid transport [GO:0006865]	-	-	-	-
TRINITY_DN7555_c0_g1_i1	711.88	5.21841	0.937362	3.43347	0.000595899	0.0172778	-	-	-	-	-	-	-	-	-	-	-
TRINITY_DN277560_c0_g1_i1	63.0488	5.19957	0.882909	3.62389	0.000290202	0.00960372	XP_020245976.1	-	-	-	-	-	-	-	-	-	-
TRINITY_DN1495_c0_g1_i1	143.623	5.19442	0.829291	3.85199	0.000117164	0.00461701	XP_008801786.2	-	-	-	-	-	-	-	-	-	-
TRINITY_DN14123_c0_g1_i4	200.778	5.18582	0.628751	5.06689	4.04362e-07	3.73375e-05	-	-	-	-	-	-	-	-	-	-	-
TRINITY_DN320_c0_g1_i4	119.355	5.18514	0.819844	3.88505	0.000102308	0.00418283	XP_018386674.1	-	-	-	-	-	-	-	-	-	-
TRINITY_DN16734_c0_g2_i1	978.572	5.18367	0.529177	6.01626	1.78489e-09	2.89281e-07	KAE8845561.1	-	-	-	-	-	-	-	-	-	-
TRINITY_DN5515_c0_g1_i5	1779.18	5.14293	0.597629	5.259	1.44838e-07	1.47185e-05	XP_020275366.1	-	-	-	-	-	-	-	-	Bradi2g44117.7.p	bHLH
TRINITY_DN3813_c0_g2_i3	114.9	5.14063	0.933387	3.36477	0.000766086	0.0211453	XP_020251050.1	-	-	-	-	-	-	-	-	FANhyb_rscf00000373.1.g00002.1	C3H
TRINITY_DN319009_c0_g1_i1	1110.07	4.85738	0.582337	4.90675	9.25975e-07	7.80387e-05	TQE12646.1	Uncharacterized protein	C1H46_001858	Malus baccata (Siberian crab apple) (Pyrus baccata)	-	-	-	-	-	-	-
TRINITY_DN11314_c0_g1_i3	344.714	5.11599	0.779451	3.99768	6.39672e-05	0.00281171	XP_020254829.1	-	-	-	-	-	-	-	-	676782350	GATA
TRINITY_DN9158_c0_g1_i2	205.436	5.11466	0.902986	3.44929	0.000562064	0.0164629	-	-	-	-	-	-	-	-	-	-	-
TRINITY_DN11309_c0_g1_i1	680.978	5.10782	0.428138	7.25891	3.90226e-13	1.22106e-10	-	-	-	-	-	-	-	-	-	-	-
TRINITY_DN2373_c0_g1_i30	115.326	5.10682	0.805076	3.85904	0.000113833	0.00454077	XP_020260410.1	-	-	-	-	-	-	-	-	-	-
TRINITY_DN319_c0_g1_i11	15598.8	5.10413	0.521189	5.95587	2.58695e-09	4.00774e-07	XP_020277202.1	-	-	-	-	-	-	-	E	Sopen09g001330.1	G2-like
TRINITY_DN3204_c1_g1_i1	5218.23	5.55266	0.50199	7.07717	1.47128e-12	4.18904e-10	AAP88404.1	Glycosyltransferase (EC 2.4.1.-)	UGT73H1	Allium cepa (Onion)	UDP-glycosyltransferase activity [GO:0008194]	-	-	-	CG	Sme2.5_06310.1_g00004.1	WRKY
TRINITY_DN3204_c1_g3_i2	1399.25	5.46544	0.425167	8.15079	3.61557e-16	1.84301e-13	AAP88404.1	Glycosyltransferase (EC 2.4.1.-)	UGT73H1	Allium cepa (Onion)	UDP-glycosyltransferase activity [GO:0008194]	-	-	-	CG	-	-
TRINITY_DN51665_c1_g1_i1	185.316	5.06779	0.635165	4.8299	1.36599e-06	0.000108743	-	-	-	-	-	-	-	-	-	-	-
TRINITY_DN32778_c0_g1_i1	4126.07	9.00139	0.60088	11.6519	2.24381e-31	7.87925e-28	THU47038.1	Uncharacterized protein	C4D60_Mb09t11280	Musa balbisiana (Banana)	-	-	-	-	-	-	-
TRINITY_DN3295_c0_g1_i24	2536.71	7.33358	0.523469	10.1889	2.22232e-24	3.34449e-21	PKA51326.1	Polygalacturonase inhibitor 1 (EC 2.7.11.1)	PGIP1 AXF42_Ash002689	Apostasia shenzhenica	protein serine kinase activity [GO:0106310]; protein threonine kinase activity [GO:0106311]	-	-	-	-	-	-
TRINITY_DN6662_c1_g2_i1	49.4654	5.04615	0.987577	3.08447	0.00203913	0.0468688	XP_028506423.1	-	-	-	-	-	-	-	-	-	-
TRINITY_DN3281_c0_g1_i3	1231.19	5.01851	0.454435	6.64234	3.08733e-11	6.96943e-09	XP_020276123.1	-	-	-	-	-	-	-	-	PGSC0003DMP400000652	bHLH
TRINITY_DN2843_c0_g1_i12	3610.17	5.00935	0.78737	3.82203	0.000132357	0.00513252	XP_020246735.1	-	-	-	-	-	-	-	-	MDP0000320566	NAC
TRINITY_DN23950_c0_g1_i4	72.2801	5.00664	0.947168	3.17434	0.00150175	0.0367918	-	-	-	-	-	-	-	-	-	-	-
TRINITY_DN73234_c0_g1_i1	58.3925	5.00205	0.934644	3.21197	0.00131826	0.0333459	XP_020263806.1	-	-	-	-	-	-	-	S	-	-
TRINITY_DN65785_c0_g1_i3	553.09	4.98239	0.458223	6.5086	7.58548e-11	1.60894e-08	-	-	-	-	-	-	-	-	-	FANhyb_rscf00000253.1.g00010.1	BBR-BPC
TRINITY_DN7779_c0_g1_i2	3781.25	4.9736	0.490917	6.05725	1.38471e-09	2.35282e-07	XP_020249304.1	-	-	-	-	-	-	-	-	Sme2.5_06310.1_g00004.1	WRKY
TRINITY_DN3310_c0_g1_i10	314.242	4.71179	0.711012	3.81399	0.00013674	0.00527018	ONK58788.1	Uncharacterized protein	A4U43_C09F16650	Asparagus officinalis (Garden asparagus)	-	-	-	-	-	-	-
TRINITY_DN588_c0_g1_i11	1927.19	4.95986	0.469645	6.30233	2.93195e-10	5.68474e-08	XP_020247744.1	-	-	-	-	-	-	-	-	-	-
TRINITY_DN3310_c0_g2_i1	75.311	4.6214	0.837873	3.12864	0.00175617	0.0416885	ONK58788.1	Uncharacterized protein	A4U43_C09F16650	Asparagus officinalis (Garden asparagus)	-	-	-	-	-	-	-
TRINITY_DN33441_c0_g1_i1	2949.26	4.92188	0.399122	7.32078	2.46541e-13	8.07173e-11	XP_020248465.1	-	-	-	-	-	-	-	-	-	-
TRINITY_DN16051_c0_g1_i3	181.854	4.91248	0.676581	4.3047	1.6721e-05	0.000898727	XP_018383182.1	-	-	-	-	-	-	-	-	-	-
TRINITY_DN2036_c0_g1_i1	918.736	4.90967	0.505163	5.75985	8.41864e-09	1.1825e-06	-	-	-	-	-	-	-	-	S	-	-
TRINITY_DN456_c0_g1_i4	181.254	4.90126	0.821505	3.53164	0.000412985	0.0128212	XP_018389468.1	-	-	-	-	-	-	-	-	-	-
TRINITY_DN470928_c0_g1_i1	1751.07	4.89471	0.451847	6.40639	1.49002e-10	3.07781e-08	XP_009419440.1	-	-	-	-	-	-	-	-	-	-
TRINITY_DN132981_c1_g1_i1	11055.9	4.89247	0.546519	5.29254	1.20632e-07	1.28361e-05	XP_026423415.1	-	-	-	-	-	-	-	-	-	-
TRINITY_DN344701_c0_g1_i1	131.92	6.83137	1.35637	3.56198	0.000368075	0.0116911	XP_010942290.1	uncharacterized protein LOC105060324	LOC105060324	Elaeis guineensis var. tenera (Oil palm)	-	-	-	-	-	-	-
TRINITY_DN3636_c0_g1_i12	7082.1	4.62134	0.495782	5.28729	1.24145e-07	1.30348e-05	THU67166.1	PMEI domain-containing protein	C4D60_Mb05t21790	Musa balbisiana (Banana)	enzyme inhibitor activity [GO:0004857]	-	-	-	-	-	-
TRINITY_DN2175_c0_g1_i5	308.239	4.87796	0.779562	3.69177	0.000222699	0.00781152	-	-	-	-	-	-	-	-	-	-	-
TRINITY_DN36585_c0_g1_i3	205.753	8.543	1.20128	5.4467	5.13139e-08	5.83354e-06	ONK77220.1	Aa_trans domain-containing protein	A4U43_C02F4320	Asparagus officinalis (Garden asparagus)	-	integral component of membrane [GO:0016021]	amino acid transport [GO:0006865]	-	E	-	-
TRINITY_DN9833_c0_g1_i1	127.756	4.87091	0.789509	3.63632	0.000276564	0.00926886	OWY44014.1	-	-	-	-	-	-	-	-	mrna31001.1-v1.0-hybrid	C3H
TRINITY_DN8668_c0_g1_i2	308.94	4.85912	0.683089	4.18558	2.84438e-05	0.00140021	-	-	-	-	-	-	-	-	-	-	-
TRINITY_DN3779_c0_g1_i10	5923.64	4.18646	0.498124	4.38939	1.13669e-05	0.000651968	AAP88406.1	Flavonoid glucosyl-transferase	UGT73G1	Allium cepa (Onion)	UDP-glycosyltransferase activity [GO:0008194]	-	-	-	-	PH01002606G0040	HSF
TRINITY_DN19584_c0_g1_i1	547.716	4.84077	0.633032	4.48757	7.204e-06	0.000449951	-	-	-	-	-	-	-	-	-	-	-
TRINITY_DN378912_c1_g1_i1	612.04	4.22622	0.441346	5.04416	4.55525e-07	4.14882e-05	XP_010923197.1	uncharacterized protein LOC105046335	LOC105046335	Elaeis guineensis var. tenera (Oil palm)	-	integral component of membrane [GO:0016021]	-	-	-	-	-
TRINITY_DN51209_c0_g1_i1	266.054	4.81617	0.755396	3.72807	0.000192948	0.00695003	-	-	-	-	-	-	-	-	-	-	-
TRINITY_DN1672_c0_g1_i1	114.948	4.81011	0.635939	4.41884	9.92318e-06	0.000581841	XP_018385917.1	-	-	-	-	-	-	-	-	-	-
TRINITY_DN3813_c0_g1_i3	245.722	4.8734	0.533022	5.39077	7.01555e-08	7.75243e-06	ONK74688.1	Receptor-like serine/threonine-protein kinase (EC 2.7.11.1)	A4U43_C03F9120	Asparagus officinalis (Garden asparagus)	ATP binding [GO:0005524]; protein serine kinase activity [GO:0106310]; protein threonine kinase activity [GO:0106311]	integral component of membrane [GO:0016021]	recognition of pollen [GO:0048544]	-	-	FANhyb_rscf00000373.1.g00002.1	C3H
TRINITY_DN42184_c0_g1_i1	127.702	6.87003	0.944634	5.15547	2.53001e-07	2.45271e-05	RWR76102.1	Glucan endo-1,3-beta-glucosidase, basic vacuolar isoform-like protein	CKAN_00451600	Cinnamomum micranthum f. kanehirae	hydrolase activity, hydrolyzing O-glycosyl compounds [GO:0004553]	-	carbohydrate metabolic process [GO:0005975]	-	-	Itr_sc004833.1_g00001.1	FAR1
TRINITY_DN20148_c0_g1_i2	165.925	4.79907	0.591478	4.73234	2.2195e-06	0.000164788	-	-	-	-	-	-	-	-	-	-	-
TRINITY_DN42720_c0_g1_i3	667.807	8.82555	2.00794	3.39928	0.000675624	0.0190988	THU44184.1	Uncharacterized protein	C4D60_Mb02t04730	Musa balbisiana (Banana)	-	integral component of membrane [GO:0016021]	-	-	-	GSMUA_Achr9P20700_001	GATA
TRINITY_DN4301_c0_g1_i7	1494.1	7.6865	0.571659	9.94737	2.58944e-23	3.14756e-20	OAY79305.1	Putative peroxygenase 4	ACMD2_00022	Ananas comosus (Pineapple) (Ananas ananas)	-	-	-	-	S	-	-
TRINITY_DN4323_c0_g1_i7	228.281	4.72846	0.518411	5.26312	1.41632e-07	1.44392e-05	ONK56482.1	Uncharacterized protein	A4U43_C10F9170	Asparagus officinalis (Garden asparagus)	-	-	-	-	O	-	-
TRINITY_DN49_c0_g2_i2	301.764	4.76098	0.62297	4.43196	9.33795e-06	0.000554911	RYN17642.1	-	-	-	-	-	-	-	-	-	-
TRINITY_DN4119_c0_g2_i1	2451.82	4.75034	0.292188	9.4129	4.82617e-21	4.76645e-18	XP_020244502.1	-	-	-	-	-	-	-	K	GSMUA_Achr6P31350_001	NAC
TRINITY_DN437684_c0_g1_i1	2433.89	4.31594	0.625359	3.70338	0.000212745	0.00755461	BAI40146.1	Glutathione S-transferase 1	gst1	Diospyros kaki (Kaki persimmon) (Diospyros chinensis)	transferase activity [GO:0016740]	-	glutathione metabolic process [GO:0006749]	-	-	-	-
TRINITY_DN48723_c0_g1_i2	187.756	4.73106	0.687943	3.96989	7.19058e-05	0.00312158	-	-	-	-	-	-	-	-	-	-	-
TRINITY_DN43951_c0_g2_i2	315.015	5.62769	0.645978	5.61581	1.95647e-08	2.47329e-06	ONK77220.1	Aa_trans domain-containing protein	A4U43_C02F4320	Asparagus officinalis (Garden asparagus)	-	integral component of membrane [GO:0016021]	amino acid transport [GO:0006865]	-	-	-	-
TRINITY_DN4554_c0_g1_i1	56.9306	9.0784	1.9208	3.68513	0.000228588	0.00796503	RVW61261.1	Dihydroanticapsin 7-dehydrogenase	bacC CK203_020572	Vitis vinifera (Grape)	oxidoreductase activity [GO:0016491]	-	-	-	Q	-	-
TRINITY_DN51209_c1_g1_i1	519.536	4.70299	0.693874	3.89551	9.7992e-05	0.00405358	-	-	-	-	-	-	-	-	-	Lus10009218	C2H2
TRINITY_DN5619_c0_g1_i3	2049.52	4.6997	0.802941	3.36227	0.000773046	0.0213002	XP_020256873.1	-	-	-	-	-	-	-	-	maker-scaffold18721-augustus-gene-0.3-mRNA-1	Dof
TRINITY_DN1563_c0_g2_i1	124.514	4.68427	0.825101	3.25327	0.00114087	0.0293762	-	-	-	-	-	-	-	-	-	-	-
TRINITY_DN30810_c0_g1_i1	51850.8	4.67879	0.454116	5.89892	3.65887e-09	5.48032e-07	XP_009406738.1	-	-	-	-	-	-	-	-	-	-
TRINITY_DN17410_c0_g1_i1	345.884	4.66679	0.84546	3.15425	0.0016091	0.0389986	XP_020269536.1	-	-	-	-	-	-	-	-	TRIUR3_17264-P1	GRAS
TRINITY_DN7169_c0_g1_i1	1608.62	4.6644	0.545473	4.88457	1.03654e-06	8.62072e-05	-	-	-	-	-	-	-	-	-	-	-
TRINITY_DN10040_c0_g1_i3	73.4831	4.65048	0.765927	3.46048	0.000539209	0.0158966	-	-	-	-	-	-	-	-	-	-	-
TRINITY_DN4084_c0_g1_i2	1430.16	4.63721	0.554928	4.75234	2.01075e-06	0.000152392	XP_024031938.1	-	-	-	-	-	-	-	-	-	-
TRINITY_DN4622_c0_g2_i7	7412.76	5.11962	0.687474	4.53781	5.68426e-06	0.000368882	OVA06947.1	Carboxypeptidase (EC 3.4.16.-)	BVC80_1731g21	Macleaya cordata	serine-type carboxypeptidase activity [GO:0004185]	-	-	-	-	-	-
TRINITY_DN4717_c0_g1_i13	2719.14	6.84539	0.607963	7.96987	1.58839e-15	7.28089e-13	XP_010919037.1	protein DMR6-LIKE OXYGENASE 1	LOC105043256	Elaeis guineensis var. tenera (Oil palm)	metal ion binding [GO:0046872]; oxidoreductase activity [GO:0016491]	-	-	-	-	676709864	STAT
TRINITY_DN474731_c0_g1_i1	31.8789	8.2415	1.81461	3.43958	0.000582628	0.0169865	XP_016484272.1	ethylene-responsive transcription factor 14-like	LOC107804845	Nicotiana tabacum (Common tobacco)	DNA binding [GO:0003677]; DNA-binding transcription factor activity [GO:0003700]	nucleus [GO:0005634]	defense response [GO:0006952]; ethylene-activated signaling pathway [GO:0009873]	-	-	Niben101Scf07761g00005.1	ERF	ERF14 like
TRINITY_DN672_c0_g1_i1	208.27	4.62066	0.586306	4.46978	7.82985e-06	0.000480494	-	-	-	-	-	-	-	-	-	-	-
TRINITY_DN2740_c0_g1_i2	5313.63	4.61416	0.355138	7.36097	1.82583e-13	6.19886e-11	-	-	-	-	-	-	-	-	-	-	-
TRINITY_DN744_c0_g1_i4	110.922	4.61364	0.678162	3.854	0.000116202	0.00459502	XP_028505849.1	-	-	-	-	-	-	-	-	-	-
TRINITY_DN47921_c2_g1_i1	32.0074	8.24565	1.7744	3.51986	0.000431767	0.0132481	TKV92175.1	Uncharacterized protein	SEVIR_9G146832v2	Setaria viridis (Green bristlegrass) (Setaria italica subsp. viridis)	-	-	-	-	-	-	-
TRINITY_DN7419_c0_g1_i1	334.734	4.61049	0.820123	3.18305	0.00145733	0.0359544	XP_020260704.1	-	-	-	-	-	-	-	-	-	-
TRINITY_DN9135_c3_g1_i1	83.3333	4.59294	0.82451	3.14483	0.00166184	0.0399094	-	-	-	-	-	-	-	-	-	-	-
TRINITY_DN148_c0_g2_i1	17965	4.58792	0.418209	6.18811	6.08882e-10	1.11232e-07	XP_020275539.1	-	-	-	-	-	-	-	O	Sme2.5_00187.1_g00004.1	MYB_related
TRINITY_DN5451_c0_g1_i1	164.619	4.56996	0.556595	4.61728	3.88796e-06	0.000267702	XP_020256440.1	-	-	-	-	-	-	-	-	XP_010904805.1	MYB
TRINITY_DN480262_c0_g1_i1	1402.98	4.4589	0.614343	4.00248	6.2681e-05	0.00276672	OMO92269.1	Uncharacterized protein	COLO4_17728	Corchorus olitorius	-	integral component of membrane [GO:0016021]	-	-	-	-	-
TRINITY_DN332093_c0_g1_i1	271.757	4.55901	0.786387	3.25413	0.00113739	0.0293437	XP_008785410.2	-	-	-	-	-	-	-	-	MDP0000294614	NAC
TRINITY_DN4803_c0_g1_i1	219.85	3.45745	0.438081	3.3269	0.00087819	0.023661	RXH88097.1	Abhydrolase_3 domain-containing protein	DVH24_042168	Malus domestica (Apple) (Pyrus malus)	hydrolase activity [GO:0016787]	-	-	-	V	-	-
TRINITY_DN3885_c2_g1_i6	4955.84	4.55365	0.64395	3.96561	7.32087e-05	0.00315646	XP_008784878.1	-	-	-	-	-	-	-	-	-	-
TRINITY_DN48080_c2_g1_i2	2666.83	3.62957	0.36484	4.46654	7.9496e-06	0.000485956	AAA32641.1	Chitinase (EC 3.2.1.14) (Fragment)	chitinase	Allium sativum (Garlic)	chitinase activity [GO:0004568]; chitin binding [GO:0008061]	-	cell wall macromolecule catabolic process [GO:0016998]; chitin catabolic process [GO:0006032]; polysaccharide catabolic process [GO:0000272]	-	-	Peinf101Scf00562g09013.1	NAC
TRINITY_DN13328_c1_g1_i7	3071.62	4.5244	0.415465	6.07608	1.23158e-09	2.11538e-07	ABP01769.1	Non-specific lipid-transfer protein	-	Salvia miltiorrhiza (Chinese sage)	lipid binding [GO:0008289]	-	lipid transport [GO:0006869]	-	-	-	-
TRINITY_DN89321_c0_g1_i1	9818.35	4.52256	0.497523	5.07025	3.97295e-07	3.68214e-05	XP_009406738.1	-	-	-	-	-	-	-	-	-	-
TRINITY_DN820_c0_g1_i2	5365.32	4.51575	0.67432	3.73079	0.000190879	0.00690221	XP_020244238.1	-	-	-	-	-	-	-	-	-	-
TRINITY_DN486_c0_g1_i3	1806.24	3.39887	0.26035	5.37305	7.74141e-08	8.49512e-06	XP_010907498.1	caffeoylshikimate esterase isoform X1	LOC105034149	Elaeis guineensis var. tenera (Oil palm)	-	-	-	-	-	-	-
TRINITY_DN5776_c0_g1_i12	2987.33	4.50912	0.475749	5.27405	1.33444e-07	1.37822e-05	XP_020274560.1	-	-	-	-	-	-	-	-	Kaladp0020s0147.1.p	bZIP
TRINITY_DN215_c0_g1_i1	245.772	4.50759	0.587921	4.26518	1.99739e-05	0.00103233	XP_020258067.1	BTB/POZ domain-containing protein At5g48130 isoform X1	-	-	-	-	-	-	S	-	-
TRINITY_DN2822_c0_g3_i2	275.972	4.50565	0.786456	3.186	0.00144254	0.0357008	-	-	-	-	-	-	-	-	-	-	-
TRINITY_DN51310_c1_g1_i2	1589.17	4.83243	0.503699	5.62326	1.87388e-08	2.40741e-06	XP_010938192.1	transcription factor JAMYB	LOC105057307	Elaeis guineensis var. tenera (Oil palm)	DNA-binding transcription factor activity [GO:0003700]; sequence-specific DNA binding [GO:0043565]	-	-	-	ADK	XP_010938192.1	MYB
TRINITY_DN1399_c0_g1_i12	1434.53	4.49752	0.448158	5.57285	2.506e-08	3.09919e-06	-	-	-	-	-	-	-	-	-	-	-
TRINITY_DN11317_c0_g1_i1	78.5219	4.49735	0.722061	3.45864	0.000542918	0.0159761	XP_008784878.1	-	-	-	-	-	-	-	-	-	-
TRINITY_DN7891_c0_g1_i1	1356.53	4.49536	0.677651	3.68237	0.000231077	0.00799884	-	-	-	-	-	-	-	-	-	-	-
TRINITY_DN140436_c0_g2_i1	22621.6	4.47811	0.509116	4.86748	1.13028e-06	9.30248e-05	AAB82777.1	Ripening-associated protein (Fragment)	-	Musa acuminata (Banana) (Musa cavendishii)	-	-	-	-	-	-	-
TRINITY_DN2144_c0_g1_i8	1999.29	4.47793	0.741611	3.34128	0.000833945	0.0226816	XP_020255490.1	-	-	-	-	-	-	-	-	-	-
TRINITY_DN51995_c1_g1_i3	5213.02	5.90135	0.897527	4.34678	1.38151e-05	0.000763306	RWR76103.1	Glucan endo-1,3-beta-glucosidase, basic vacuolar isoform-like protein	CKAN_00451700	Cinnamomum micranthum f. kanehirae	hydrolase activity, hydrolyzing O-glycosyl compounds [GO:0004553]	-	carbohydrate metabolic process [GO:0005975]	-	-	Itr_sc004833.1_g00001.1	FAR1
TRINITY_DN16713_c2_g1_i3	502.296	4.4427	0.360197	6.78156	1.18882e-11	3.02996e-09	-	-	-	-	-	-	-	-	-	-	-
TRINITY_DN7811_c0_g1_i5	77.9293	4.43581	0.730725	3.33342	0.000857864	0.0232322	RYN31814.1	-	-	-	-	-	-	-	-	-	-
TRINITY_DN9923_c1_g1_i1	211.233	4.42699	0.568417	4.26973	1.95707e-05	0.00101897	AMN85689.1	Sucrose synthase (EC 2.4.1.13) (Fragment)	-	Aeschynomene crassicaulis	sucrose synthase activity [GO:0016157]	-	sucrose metabolic process [GO:0005985]	-	-	mrna11429.1-v1.0-hybrid	HB-other
TRINITY_DN172215_c0_g1_i1	296.583	4.42413	0.755454	3.20885	0.00133269	0.0335604	XP_018385591.1	-	-	-	-	-	-	-	-	MDP0000218395	FAR1
TRINITY_DN51995_c1_g2_i4	5162.88	5.83615	0.802997	4.77729	1.77676e-06	0.000137629	RWR76103.1	Glucan endo-1,3-beta-glucosidase, basic vacuolar isoform-like protein	CKAN_00451700	Cinnamomum micranthum f. kanehirae	hydrolase activity, hydrolyzing O-glycosyl compounds [GO:0004553]	-	carbohydrate metabolic process [GO:0005975]	-	G	Itr_sc004833.1_g00001.1	FAR1
TRINITY_DN108153_c0_g1_i1	582.651	4.40342	0.443908	5.41424	6.15479e-08	6.84915e-06	-	-	-	-	-	-	-	-	-	-	-
TRINITY_DN9907_c0_g1_i3	266.376	4.34619	0.654777	3.58319	0.000339421	0.0109015	XP_020272903.1	-	-	-	-	-	-	-	-	EMT28879	ERF
TRINITY_DN5248_c1_g1_i4	62549.2	4.18805	0.361068	6.05994	1.36174e-09	2.32629e-07	AAF15307.1	ASR protein (Anth) (Pollen-specific ASR protein LLA23)	A23 LLA23	Lilium longiflorum (Trumpet lily)	-	-	-	-	-	-	-
TRINITY_DN41962_c0_g1_i2	845.091	4.33406	0.364751	6.39905	1.56348e-10	3.20859e-08	XP_020256466.1	-	-	-	-	-	-	-	T	Itr_sc000748.1_g00024.1	MYB_related
TRINITY_DN3908_c0_g1_i5	1220.45	4.3333	0.372958	6.25619	3.94498e-10	7.51067e-08	XP_020276151.1	-	-	-	-	-	-	-	-	-	-
TRINITY_DN378766_c0_g1_i1	408.927	4.31795	0.419873	5.5206	3.37847e-08	4.079e-06	XP_020263780.1	-	-	-	-	-	-	-	-	-	-
TRINITY_DN5259_c0_g1_i3	4048.88	5.65351	0.946794	3.85882	0.000113936	0.00454077	ARO76406.1	ACC oxidase (Fragment)	ACOY2	Narcissus tazetta subsp. chinensis	metal ion binding [GO:0046872]; oxidoreductase activity [GO:0016491]	-	-	-	Q	-	-
TRINITY_DN5297_c0_g1_i11	113.314	4.88997	0.795899	3.63108	0.00028224	0.00937951	ESR64379.1	Uncharacterized protein	CICLE_v10010340mg	Citrus clementina (Clementine) (Citrus deliciosa x Citrus sinensis)	-	integral component of membrane [GO:0016021]	-	-	S	-	-
TRINITY_DN24892_c0_g1_i1	87.4498	4.2591	0.709982	3.18191	0.00146306	0.0360676	EFQ91258.1	-	-	-	-	-	-	-	-	-	-
TRINITY_DN63385_c0_g1_i1	763.804	4.25399	0.387691	5.81388	6.10416e-09	8.93129e-07	XP_028782524.1	-	-	-	-	-	-	-	-	Csa09g009740.1	HSF
TRINITY_DN5342_c0_g1_i1	1260.47	4.24838	0.666566	3.37308	0.000743315	0.0206068	XP_020256429.1	-	-	-	-	-	-	-	-	-	-
TRINITY_DN9962_c0_g1_i5	6876.72	4.23738	0.644336	3.47238	0.000515867	0.0153228	XP_020257114.1	-	-	-	-	-	-	-	-	mrna00620.1-v1.0-hybrid	BBR-BPC
TRINITY_DN13920_c0_g1_i1	1042.87	4.23053	0.464587	4.80109	1.57801e-06	0.000124058	XP_020269556.1	-	-	-	-	-	-	-	-	EPS67213.1	NAC
TRINITY_DN53152_c0_g1_i5	4708.68	3.80153	0.405354	4.44433	8.81655e-06	0.000529731	PKA62201.1	Blue copper protein	AXF42_Ash015086	Apostasia shenzhenica	electron transfer activity [GO:0009055]	integral component of membrane [GO:0016021]	-	-	-	-	-
TRINITY_DN8706_c0_g1_i1	912.906	4.22527	0.628097	3.54288	0.00039579	0.012348	XP_020244806.1	-	-	-	-	-	-	-	-	ONIVA01G08700.1	BES1
TRINITY_DN2026_c0_g3_i1	6252.52	4.21614	0.510471	4.34135	1.41608e-05	0.000779681	-	-	-	-	-	-	-	-	-	-	-
TRINITY_DN239_c0_g2_i1	2943.99	4.20647	0.338642	6.51563	7.23861e-11	1.54574e-08	XP_020273539.1	-	-	-	-	-	-	-	-	-	-
TRINITY_DN8046_c0_g1_i4	1674.61	4.19138	0.435989	5.02621	5.00261e-07	4.50434e-05	XP_020244037.1	-	-	-	-	-	-	-	-	Lus10031505	NF-YA
TRINITY_DN311_c0_g2_i1	143.823	4.18928	0.644173	3.39859	0.000677334	0.01913	RYN21537.1	-	-	-	-	-	-	-	-	-	-
TRINITY_DN53152_c0_g2_i2	5136.53	3.41203	0.399726	3.5325	0.000411646	0.0127922	PKA62201.1	Blue copper protein	AXF42_Ash015086	Apostasia shenzhenica	electron transfer activity [GO:0009055]	integral component of membrane [GO:0016021]	-	-	-	-	-
TRINITY_DN5416_c0_g1_i9	41.7312	8.62896	1.71006	3.87646	0.000105988	0.00429995	VAH65231.1	4-hydroxy-7-methoxy-3-oxo-3,4-dihydro-2H-1,4-benzoxazin-2-yl glucosidebeta-D-glucosidase (EC 3.2.1.182)	TRITD_3Av1G208340	Triticum turgidum subsp. durum (Durum wheat) (Triticum durum)	DIMBOA glucoside beta-D-glucosidase activity [GO:0102726]	plastid [GO:0009536]	carbohydrate metabolic process [GO:0005975]	-	-	Jcr4S00282.90	NAC
TRINITY_DN10410_c0_g1_i5	183.994	4.18573	0.482476	4.53025	5.89144e-06	0.000379986	-	-	-	-	-	-	-	-	-	-	-
TRINITY_DN54674_c0_g1_i3	565.437	6.77921	0.539412	8.86004	7.99857e-19	6.16553e-16	OAY65164.1	Caffeoylshikimate esterase	ACMD2_11937	Ananas comosus (Pineapple) (Ananas ananas)	-	-	-	-	-	-	-
TRINITY_DN38428_c0_g1_i1	215.555	4.15926	0.560298	3.85377	0.000116315	0.00459502	-	-	-	-	-	-	-	-	-	-	-
TRINITY_DN312_c0_g1_i2	4871.52	4.15756	0.461208	4.67806	2.89597e-06	0.000206136	-	-	-	-	-	-	-	-	-	-	-
TRINITY_DN61127_c0_g1_i1	654.338	7.60251	0.574715	9.74833	1.87526e-22	2.11663e-19	PON66640.1	Tricorn protease	PanWU01x14_108820	Parasponia andersonii (Sponia andersonii)	peptidase activity [GO:0008233]	-	-	-	-	-	-
TRINITY_DN5767_c0_g1_i1	792.164	4.1248	0.557789	3.80933	0.000139344	0.00535095	RZR77825.1	-	-	-	-	-	-	-	-	-	-
TRINITY_DN29898_c0_g1_i1	3365.19	4.1152	0.307157	6.88636	5.72366e-12	1.50742e-09	XP_008783606.1	-	-	-	-	-	-	-	-	MDP0000263576	GRAS
TRINITY_DN125776_c0_g2_i1	117.816	4.09438	0.65853	3.18038	0.00147083	0.0362025	-	-	-	-	-	-	-	-	-	-	-
TRINITY_DN6333_c1_g1_i4	164.598	4.06367	0.547804	3.76717	0.000165109	0.00619631	-	-	-	-	-	-	-	-	-	-	-
TRINITY_DN1572_c0_g3_i1	528.093	4.06307	0.603607	3.4179	0.000631069	0.0180983	XP_020246901.1	-	-	-	-	-	-	-	-	676709864	STAT
TRINITY_DN977_c3_g1_i3	2639.8	4.05281	0.30766	6.67234	2.51756e-11	5.76558e-09	ACA58352.1	Putative cyclic nucleotide-gated cation channel	-	Sandersonia aurantiaca (Christmas-bells) (Chinese-lantern lily)	ion channel activity [GO:0005216]	integral component of membrane [GO:0016021]	-	-	-	-	-
TRINITY_DN3787_c0_g1_i13	799.969	4.03858	0.452392	4.50622	6.59931e-06	0.000415467	XP_017699195.1	-	-	-	-	-	-	-	-	FANhyb_rscf00000217.1.g00006.1	WRKY
TRINITY_DN66362_c0_g1_i1	419.07	7.3449	0.914319	5.84578	5.04214e-09	7.48131e-07	ONK77220.1	Aa_trans domain-containing protein	A4U43_C02F4320	Asparagus officinalis (Garden asparagus)	-	integral component of membrane [GO:0016021]	amino acid transport [GO:0006865]	-	-	-	-
TRINITY_DN49075_c0_g1_i1	261.908	4.03259	0.601863	3.37716	0.000732376	0.0203571	XP_020275539.1	-	-	-	-	-	-	-	-	Sme2.5_00187.1_g00004.1	MYB_related
TRINITY_DN7087_c0_g2_i11	256.664	4.0255	0.431357	4.69566	2.65748e-06	0.00019219	-	-	-	-	-	-	-	-	-	-	-
TRINITY_DN8277_c0_g1_i26	6944.73	4.01519	0.241496	8.34461	7.1448e-17	4.1824e-14	XP_020257596.1	-	-	-	-	-	-	-	P	AHYPO_019315-RA	bHLH
TRINITY_DN2074_c0_g2_i1	15384.1	4.00036	0.426923	4.68552	2.79256e-06	0.000199674	XP_020261562.1	-	-	-	-	-	-	-	-	FANhyb_rscf00000253.1.g00010.1	BBR-BPC
TRINITY_DN5152_c0_g1_i1	10600.7	3.99465	0.242637	8.22073	2.02262e-16	1.06538e-13	XP_020244022.1	-	-	-	-	-	-	-	-	Ote100112080011	bHLH
TRINITY_DN4467_c0_g1_i2	1483.53	3.99086	0.437523	4.55031	5.35669e-06	0.000354169	-	-	-	-	-	-	-	-	-	-	-
TRINITY_DN29899_c3_g1_i1	145.784	3.99066	0.592212	3.36139	0.000775507	0.0213494	-	-	-	-	-	-	-	-	-	-	-
TRINITY_DN11736_c0_g1_i1	388.762	3.98895	0.621738	3.19901	0.00137899	0.0344454	-	-	-	-	-	-	-	-	-	-	-
TRINITY_DN11056_c1_g1_i2	6918.06	3.9727	0.505384	3.90336	9.48658e-05	0.00395008	XP_020243896.1	-	-	-	-	-	-	-	S	-	-
TRINITY_DN1711_c0_g1_i1	441.583	3.94823	0.520244	3.74483	0.000180517	0.00661838	XP_020248856.1	-	-	-	-	-	-	-	-	KN538722.1_FGP037	HB-PHD
TRINITY_DN4806_c3_g1_i1	279.377	3.93184	0.49711	3.88613	0.000101854	0.0041735	-	-	-	-	-	-	-	-	-	-	-
TRINITY_DN4674_c0_g1_i8	5306.48	3.92031	0.353191	5.43704	5.41744e-08	6.10545e-06	XP_020248218.1	-	-	-	-	-	-	-	-	-	-
TRINITY_DN2791_c0_g1_i3	20085.2	3.89975	0.555933	3.41723	0.000632627	0.0181265	XP_020259224.1	-	-	-	-	-	-	-	-	-	-
TRINITY_DN187_c0_g1_i5	1190.05	3.87092	0.333976	5.60197	2.11933e-08	2.6474e-06	-	-	-	-	-	-	-	-	S	-	-
TRINITY_DN303_c1_g1_i7	474.813	3.86544	0.458267	4.07064	4.68842e-05	0.00218401	-	-	-	-	-	-	-	-	K	-	-
TRINITY_DN66470_c0_g1_i1	37.0143	8.45666	1.75933	3.66995	0.000242595	0.00832463	XP_010910186.3	Pectinesterase (EC 3.1.1.11)	LOC105036139	Elaeis guineensis var. tenera (Oil palm)	aspartyl esterase activity [GO:0045330]; enzyme inhibitor activity [GO:0004857]; pectinesterase activity [GO:0030599]	-	cell wall modification [GO:0042545]; pectin catabolic process [GO:0045490]	PATHWAY: Glycan metabolism. {ECO:0000256|ARBA:ARBA00004881}.; PATHWAY: Glycan metabolism; pectin degradation; 2-dehydro-3-deoxy-D-gluconate from pectin: step 1/5. {ECO:0000256|ARBA:ARBA00005184, ECO:0000256|RuleBase:RU000589}.	-	MDP0000320566	NAC
TRINITY_DN9355_c1_g1_i2	4742.77	3.85172	0.244636	7.56929	3.75259e-14	1.42888e-11	XP_020248281.1	-	-	-	-	-	-	-	-	Sp_159490_wski.t1	bHLH
TRINITY_DN2148_c0_g1_i6	451.461	3.85147	0.452954	4.08755	4.3596e-05	0.00205031	XP_008795770.1	-	-	-	-	-	-	-	-	Vang03g11510.1	Trihelix
TRINITY_DN3994_c0_g1_i1	921.886	3.83843	0.356242	5.16063	2.46122e-07	2.40076e-05	XP_020682015.1	-	-	-	-	-	-	-	-	KZV22762.1	CAMTA
TRINITY_DN2026_c2_g1_i3	84476.3	3.82855	0.435316	4.20051	2.66318e-05	0.0013213	-	-	-	-	-	-	-	-	-	-	-
TRINITY_DN2962_c0_g1_i15	6959.71	3.81722	0.232074	7.83036	4.86461e-15	2.07758e-12	XP_020250695.1	-	-	-	-	-	-	-	-	-	-
TRINITY_DN20426_c0_g1_i11	1198.3	3.81212	0.527319	3.43647	0.000589337	0.0171505	-	-	-	-	-	-	-	-	-	-	-
TRINITY_DN680_c0_g1_i1	503.807	3.7978	0.546439	3.29003	0.00100177	0.0264715	KQJ83044.1	Uncharacterized protein	BRADI_5g12781v3	Brachypodium distachyon (Purple false brome) (Trachynia distachya)	-	-	-	-	-	-	-
TRINITY_DN680_c0_g2_i1	151.05	6.55965	0.915558	4.98018	6.35241e-07	5.59225e-05	KQJ83044.1	Uncharacterized protein	BRADI_5g12781v3	Brachypodium distachyon (Purple false brome) (Trachynia distachya)	-	-	-	-	-	-	-
TRINITY_DN6938_c0_g1_i5	1955.34	3.72844	0.454742	3.80092	0.000144161	0.00551173	ONK66003.1	Lysine ketoglutarate reductase (EC 1.5.1.8) (EC 1.5.1.9) (Saccharopine dehydrogenase)	A4U43_C06F3180	Asparagus officinalis (Garden asparagus)	saccharopine dehydrogenase (NAD+, L-glutamate-forming) activity [GO:0047131]; saccharopine dehydrogenase (NADP+, L-lysine-forming) activity [GO:0047130]	integral component of membrane [GO:0016021]	L-lysine catabolic process to acetyl-CoA via saccharopine [GO:0033512]	PATHWAY: Amino-acid degradation; L-lysine degradation via saccharopine pathway; glutaryl-CoA from L-lysine: step 1/6. {ECO:0000256|ARBA:ARBA00004682}.; PATHWAY: Amino-acid degradation; L-lysine degradation via saccharopine pathway; glutaryl-CoA from L-lysine: step 2/6. {ECO:0000256|ARBA:ARBA00004720}.	-	-	-
TRINITY_DN14026_c0_g1_i1	3794.09	3.78434	0.295155	6.04544	1.49006e-09	2.50489e-07	XP_008775734.1	-	-	-	-	-	-	-	-	-	-
TRINITY_DN6981_c0_g1_i1	70.1457	7.95351	1.53929	3.86771	0.000109863	0.00442308	CAN77092.1	Pectinesterase (EC 3.1.1.11)	VITISV_026596	Vitis vinifera (Grape)	aspartyl esterase activity [GO:0045330]; enzyme inhibitor activity [GO:0004857]; pectinesterase activity [GO:0030599]	cell wall [GO:0005618]; extracellular region [GO:0005576]	cell wall modification [GO:0042545]; pectin catabolic process [GO:0045490]	PATHWAY: Glycan metabolism. {ECO:0000256|ARBA:ARBA00004881}.; PATHWAY: Glycan metabolism; pectin degradation; 2-dehydro-3-deoxy-D-gluconate from pectin: step 1/5. {ECO:0000256|ARBA:ARBA00005184, ECO:0000256|RuleBase:RU000589}.	-	MDP0000320566	NAC
TRINITY_DN2798_c0_g2_i1	5284.48	3.76992	0.397215	4.45583	8.35686e-06	0.000506929	XP_009380624.1	-	-	-	-	-	-	-	-	-	-
TRINITY_DN4346_c0_g1_i1	2358.78	3.76751	0.502146	3.51992	0.000431673	0.0132481	-	-	-	-	-	-	-	-	-	-	-
TRINITY_DN7152_c0_g1_i1	112.022	5.27782	0.746137	4.39306	1.11768e-05	0.000642237	ONK63163.1	Uncharacterized protein	A4U43_C07F12060	Asparagus officinalis (Garden asparagus)	DNA-binding transcription factor activity [GO:0003700]; sequence-specific DNA binding [GO:0043565]	-	-	-	-	Aco002582.1	MYB
TRINITY_DN972_c0_g1_i2	1602.02	3.74836	0.384516	4.54692	5.44362e-06	0.000358417	XP_020262345.1	thaumatin-like protein	-	-	-	-	-	-	-	-	-
TRINITY_DN5310_c0_g1_i3	1003.51	3.74212	0.291869	5.96884	2.3895e-09	3.73851e-07	-	-	-	-	-	-	-	-	-	-	-
TRINITY_DN6514_c0_g2_i1	1318.07	3.73948	0.523253	3.32436	0.000886206	0.0238363	XP_020254491.1	-	-	-	-	-	-	-	P	CCG011654.1	C3H
TRINITY_DN2581_c0_g3_i1	1155.29	3.73573	0.338903	5.12162	3.02924e-07	2.89233e-05	-	-	-	-	-	-	-	-	-	-	-
TRINITY_DN12496_c0_g2_i1	692.741	3.73425	0.427216	4.05941	4.91963e-05	0.00227977	-	-	-	-	-	-	-	-	P	-	-
TRINITY_DN7177_c0_g1_i2	570.888	5.30782	0.552224	5.99	2.09847e-09	3.33266e-07	XP_010921044.1	uncharacterized protein LOC105044746	LOC105044746	Elaeis guineensis var. tenera (Oil palm)	-	-	-	-	-	Sopen10g007160.1	M-type_MADS
TRINITY_DN35403_c1_g1_i10	7143.31	3.72578	0.484586	3.56134	0.000368967	0.0117077	-	-	-	-	-	-	-	-	-	-	-
TRINITY_DN120434_c0_g1_i1	10031	3.72406	0.430741	4.00254	6.26656e-05	0.00276672	ASV46320.1	Beta 1,3-glucanase	-	Lilium regale (Regal lily)	hydrolase activity, hydrolyzing O-glycosyl compounds [GO:0004553]	-	carbohydrate metabolic process [GO:0005975]	-	-	-	-
TRINITY_DN16151_c0_g2_i11	1866.4	3.7161	0.389233	4.40892	1.03887e-05	0.000604647	XP_020270243.1	-	-	-	-	-	-	-	-	Vang0599s00010.1	NAC
TRINITY_DN12436_c0_g1_i5	816.794	3.71603	0.337065	5.0911	3.55995e-07	3.32865e-05	-	-	-	-	-	-	-	-	-	-	-
TRINITY_DN23994_c0_g1_i3	804.785	3.71253	0.470335	3.64109	0.000271491	0.0091376	XP_020576272.1	-	-	-	-	-	-	-	-	-	-
TRINITY_DN719_c0_g2_i2	2255.85	5.3882	0.47251	7.17065	7.46417e-13	2.22545e-10	ONK66214.1	FAD_binding_3 domain-containing protein	A4U43_C06F5410	Asparagus officinalis (Garden asparagus)	FAD binding [GO:0071949]; monooxygenase activity [GO:0004497]	-	-	-	-	-	-
TRINITY_DN101266_c0_g1_i1	6112.42	3.70766	0.434323	3.93177	8.43233e-05	0.00357712	XP_020253182.1	-	-	-	-	-	-	-	-	EPS67213.1	NAC
TRINITY_DN7448_c2_g1_i2	1235.58	4.15133	0.552535	3.89357	9.87797e-05	0.00407019	XP_010919190.1	glutathione S-transferase U17	LOC105043366	Elaeis guineensis var. tenera (Oil palm)	transferase activity [GO:0016740]	-	glutathione metabolic process [GO:0006749]	-	-	-	-
TRINITY_DN16151_c0_g1_i28	348.535	3.69151	0.398282	4.247	2.16648e-05	0.00110013	XP_020270243.1	-	-	-	-	-	-	-	S	Vang0599s00010.1	NAC
TRINITY_DN4200_c0_g1_i16	12963.2	3.67788	0.416225	4.03118	5.54977e-05	0.0024985	XP_020267973.1	-	-	-	-	-	-	-	-	-	-
TRINITY_DN27179_c0_g1_i1	26646.6	3.65887	0.413977	4.00714	6.14573e-05	0.00272795	XP_008800262.1	-	-	-	-	-	-	-	-	-	-
TRINITY_DN3026_c0_g1_i20	1175.62	3.65301	0.361732	4.56972	4.88387e-06	0.00032821	XP_020269916.1	-	-	-	-	-	-	-	-	Gh_A02G0666	G2-like
TRINITY_DN36935_c0_g1_i2	3132.79	3.63835	0.5271	3.10823	0.00188209	0.0438008	XP_020241844.1	-	-	-	-	-	-	-	-	-	-
TRINITY_DN7536_c1_g1_i6	251.69	3.63221	0.520451	3.13615	0.00171184	0.0408926	-	-	-	-	-	-	-	-	-	-	-
TRINITY_DN7543_c0_g1_i1	16701.6	8.37566	0.764047	8.34459	7.14623e-17	4.1824e-14	OAY72694.1	Senescence-specific cysteine protease SAG39	ACMD2_25817	Ananas comosus (Pineapple) (Ananas ananas)	cysteine-type peptidase activity [GO:0008234]	-	-	-	-	FANhyb_rscf00000253.1.g00010.1	BBR-BPC
TRINITY_DN9941_c0_g1_i1	4486.68	3.62888	0.280568	5.80565	6.41178e-09	9.33815e-07	XP_020245243.1	-	-	-	-	-	-	-	-	-	-
TRINITY_DN7574_c0_g1_i1	38.0862	8.49687	1.72908	3.75741	0.00017168	0.00637576	AIU39030.1	Myb transcription factor 1	MYB1	Narcissus tazetta subsp. chinensis	catalytic activity [GO:0003824]; DNA-binding transcription factor activity [GO:0003700]; sequence-specific DNA binding [GO:0043565]	-	-	-	-	Aqcoe3G034600.1.p	MYB
TRINITY_DN7611_c0_g2_i1	1060.92	5.07839	0.820296	3.75278	0.000174888	0.00647668	ONK81095.1	Uncharacterized protein	A4U43_C01F25230	Asparagus officinalis (Garden asparagus)	heme binding [GO:0020037]; iron ion binding [GO:0005506]; monooxygenase activity [GO:0004497]; oxidoreductase activity, acting on paired donors, with incorporation or reduction of molecular oxygen [GO:0016705]	-	-	-	-	-	-
TRINITY_DN79_c0_g2_i2	5503	3.61143	0.445672	3.61573	0.000299497	0.00982897	XP_020257469.1	-	-	-	-	-	-	-	-	TRIUR3_11943-P1	ERF
TRINITY_DN29933_c0_g1_i7	254.993	3.60812	0.460091	3.49522	0.000473674	0.0142571	AEX55228.1	Pathogenesis-related protein 1	-	Allium sativum (Garlic)	-	extracellular region [GO:0005576]	defense response [GO:0006952]	-	-	676765096	MYB_related
TRINITY_DN933_c0_g1_i4	22238.4	3.60684	0.289947	5.54184	2.99316e-08	3.65234e-06	XP_020265168.1	-	-	-	-	-	-	-	-	-	-
TRINITY_DN7705_c0_g1_i4	1451.29	2.84336	0.266783	3.16122	0.00157112	0.0382245	XP_010942647.1	transport inhibitor response 1-like protein	LOC105060573	Elaeis guineensis var. tenera (Oil palm)	-	-	-	-	-	-	-
TRINITY_DN5067_c0_g2_i1	566.55	3.5917	0.430753	3.69517	0.000219742	0.00773356	-	-	-	-	-	-	-	-	-	DCAR_008343	ERF	ERF2
TRINITY_DN579_c1_g1_i3	2216.59	3.58351	0.428087	3.69904	0.000216413	0.00765045	XP_020679188.1	-	-	-	-	-	-	-	-	-	-
TRINITY_DN12668_c0_g1_i1	222.676	3.57918	0.423589	3.72811	0.000192922	0.00695003	-	-	-	-	-	-	-	-	M	-	-
TRINITY_DN12041_c0_g1_i2	15507.5	3.56926	0.428159	3.66512	0.000247219	0.00844662	XP_020244575.1	-	-	-	-	-	-	-	-	Lus10007348	MYB_related
TRINITY_DN96_c0_g3_i22	595.358	3.53385	0.386632	3.96722	7.27162e-05	0.0031438	XP_020242404.1	-	-	-	-	-	-	-	-	Aco005719.1	WRKY
TRINITY_DN8182_c0_g2_i1	1418.52	3.51134	0.444849	3.39742	0.00068024	0.0191778	XP_020270255.1	-	-	-	-	-	-	-	K	NNU_008679-RA	NAC
TRINITY_DN7827_c1_g2_i1	3618.81	3.02493	0.329287	3.11257	0.00185465	0.0433858	XP_010933488.1	acetylornithine deacetylase isoform X2	LOC105053869	Elaeis guineensis var. tenera (Oil palm)	hydrolase activity [GO:0016787]	-	-	-	-	-	-
TRINITY_DN2565_c0_g2_i2	3870.45	3.49114	0.411443	3.62416	0.0002899	0.00960372	XP_020252566.1	-	-	-	-	-	-	-	-	-	-
TRINITY_DN5084_c1_g1_i1	229.823	3.47059	0.416954	3.52697	0.000420341	0.0129731	XP_020260418.1	-	-	-	-	-	-	-	-	-	-
TRINITY_DN8070_c0_g1_i1	2556.88	4.41307	0.687314	3.51087	0.00044665	0.0135992	PKU60828.1	Glutathione S-transferase U18	GSTU18 MA16_Dca028563	Dendrobium catenatum	transferase activity [GO:0016740]	-	-	-	-	-	-
TRINITY_DN81324_c0_g1_i3	35660.2	3.44371	0.23263	6.20605	5.43321e-10	9.9832e-08	AAA32640.1	Chitinase (EC 3.2.1.14) (Fragment)	chitinase	Allium sativum (Garlic)	chitinase activity [GO:0004568]; chitin binding [GO:0008061]	-	cell wall macromolecule catabolic process [GO:0016998]; chitin catabolic process [GO:0006032]; polysaccharide catabolic process [GO:0000272]	-	-	-	-
TRINITY_DN3076_c1_g2_i3	2384.05	3.44818	0.369004	3.92455	8.68906e-05	0.00366145	XP_020251862.1	-	-	-	-	-	-	-	-	Glyma.19G047800.1.p	G2-like
TRINITY_DN81324_c0_g2_i1	1102.51	3.62716	0.403117	4.03645	5.42661e-05	0.00246796	AAA32641.1	Chitinase (EC 3.2.1.14) (Fragment)	chitinase	Allium sativum (Garlic)	chitinase activity [GO:0004568]; chitin binding [GO:0008061]	-	cell wall macromolecule catabolic process [GO:0016998]; chitin catabolic process [GO:0006032]; polysaccharide catabolic process [GO:0000272]	-	S	-	-
TRINITY_DN983_c0_g1_i4	3183.35	3.44186	0.400145	3.60333	0.000314166	0.0102386	XP_020271607.1	-	-	-	-	-	-	-	-	Aco011109.1	WRKY
TRINITY_DN8198_c0_g2_i8	608.021	6.91419	0.642087	7.65346	1.95639e-14	7.54022e-12	XP_010939642.1	probable indole-3-acetic acid-amido synthetase GH3.8	LOC105058413	Elaeis guineensis var. tenera (Oil palm)	-	-	-	-	-	RrC1700_p1	ERF	AP2 6l
TRINITY_DN8865_c0_g1_i2	4209.82	4.34474	0.495099	4.7359	2.18083e-06	0.000163324	XP_019705619.1	SPX domain-containing membrane protein OsI_17046	LOC105043377	Elaeis guineensis var. tenera (Oil palm)	transmembrane transporter activity [GO:0022857]	integral component of membrane [GO:0016021]	-	-	P	Oropetium_20150105_21144A	C3H
TRINITY_DN15846_c0_g1_i3	15427	3.42998	0.38178	3.74557	0.000179988	0.00660667	XP_009400126.1	-	-	-	-	-	-	-	-	-	-
TRINITY_DN420311_c0_g1_i1	2180.7	3.42256	0.325166	4.37488	1.21502e-05	0.000688162	-	-	-	-	-	-	-	-	-	-	-
TRINITY_DN9182_c1_g2_i6	566.593	4.77999	0.831696	3.34255	0.000830123	0.0225971	ACZ54911.3	1-aminocyclopropane-1-carboxylic acid synthase	ACS	Narcissus tazetta subsp. chinensis	lyase activity [GO:0016829]; pyridoxal phosphate binding [GO:0030170]	-	biosynthetic process [GO:0009058]	-	-	-	-
TRINITY_DN943_c1_g1_i2	164.094	10.6047	1.7303	4.97295	6.59404e-07	5.78883e-05	RVW61261.1	Dihydroanticapsin 7-dehydrogenase	bacC CK203_020572	Vitis vinifera (Grape)	oxidoreductase activity [GO:0016491]	-	-	-	Q	-	-
TRINITY_DN556_c4_g1_i30	697.475	3.37146	0.343287	3.99508	6.46733e-05	0.00283093	XP_020260356.1	-	-	-	-	-	-	-	-	Pbr002083.1	ERF	ERF3
TRINITY_DN37915_c0_g2_i4	730.63	3.36844	0.365695	3.74203	0.00018254	0.00667289	XP_020246800.1	-	-	-	-	-	-	-	-	ORUFI02G18860.2	MYB_related
TRINITY_DN1398_c1_g1_i1	2205.41	3.36358	0.353745	3.85472	0.000115864	0.0045922	XP_020249553.1	-	-	-	-	-	-	-	-	-	-
TRINITY_DN94348_c1_g1_i1	31169.1	9.23151	0.538222	13.4359	3.72459e-41	1.4298e-37	XP_010917599.1	pathogenesis-related protein PR-4 isoform X1 (pathogenesis-related protein PR-4 isoform X2)	LOC105042179	Elaeis guineensis var. tenera (Oil palm)	ribonuclease activity [GO:0004540]	-	defense response to bacterium [GO:0042742]; defense response to fungus [GO:0050832]	-	-	-	-
TRINITY_DN9654_c0_g1_i1	8538.02	5.64754	0.644885	5.65611	1.54841e-08	2.05614e-06	RWW13334.1	Methyltransf_11 domain-containing protein	GW17_00022958	Ensete ventricosum (Abyssinian banana) (Musa ensete)	methyltransferase activity [GO:0008168]	-	-	-	S	-	-
TRINITY_DN14130_c0_g1_i1	515.804	3.32086	0.375555	3.51709	0.000436313	0.0133617	XP_020275259.1	-	-	-	-	-	-	-	-	Dca51618.1	NF-YA
TRINITY_DN6940_c0_g1_i1	4396.75	3.31155	0.290418	4.51609	6.29933e-06	0.000401379	XP_020249509.1	-	-	-	-	-	-	-	-	Sp_073850_ixmz.t1	MYB_related
TRINITY_DN6417_c0_g1_i6	9513.46	3.3064	0.383705	3.40469	0.000662385	0.0188595	XP_020248987.1	-	-	-	-	-	-	-	-	-	-
TRINITY_DN1398_c1_g2_i1	476.33	3.30577	0.339809	3.84266	0.00012171	0.00477236	XP_020245325.1	-	-	-	-	-	-	-	-	Tp57577_TGAC_v2_mRNA33215	bHLH
TRINITY_DN3284_c0_g1_i1	4518.55	3.30099	0.354961	3.66515	0.000247194	0.00844662	XP_020268704.1	-	-	-	-	-	-	-	-	440731	ERF
TRINITY_DN3742_c0_g1_i9	9717.56	3.29943	0.347603	3.73827	0.00018529	0.00673092	XP_020259476.1	-	-	-	-	-	-	-	-	-	-
TRINITY_DN4694_c0_g1_i4	803.047	3.28511	0.417931	3.07494	0.00210543	0.0480912	XP_020267337.1	-	-	-	-	-	-	-	S	-	-
TRINITY_DN4581_c1_g1_i1	108506	3.263	0.32328	3.90682	9.35171e-05	0.00390424	-	-	-	-	-	-	-	-	-	-	-
TRINITY_DN2747_c0_g2_i2	19674.2	3.24158	0.254182	4.88461	1.03636e-06	8.62072e-05	XP_020247956.1	-	-	-	-	-	-	-	-	676709864	STAT
TRINITY_DN8826_c0_g1_i1	629.476	3.23237	0.337211	3.6546	0.000257581	0.00875331	-	-	-	-	-	-	-	-	-	-	-
TRINITY_DN1928_c0_g3_i1	24172.9	3.22708	0.264047	4.64721	3.36461e-06	0.000236827	XP_020273969.1	-	-	-	-	-	-	-	-	-	-
TRINITY_DN5063_c0_g1_i1	2584.49	3.21005	0.385055	3.14255	0.00167484	0.04013	XP_020256854.1	-	-	-	-	-	-	-	-	GRMZM2G396451_P01	GATA
TRINITY_DN15654_c0_g1_i2	1916.18	3.20425	0.375825	3.20429	0.00135397	0.034015	XP_020260949.1	-	-	-	-	-	-	-	-	DCAR_019739	C3H
TRINITY_DN1576_c0_g1_i10	2329.87	3.19481	0.322993	3.69918	0.000216299	0.00765045	-	-	-	-	-	-	-	-	-	-	-
TRINITY_DN12747_c0_g1_i3	924.042	3.16659	0.325346	3.58568	0.000336202	0.0108311	-	-	-	-	-	-	-	-	-	-	-
TRINITY_DN5782_c0_g1_i1	1363.84	3.1573	0.357238	3.23957	0.00119711	0.0305356	XP_004301093.2	-	-	-	-	-	-	-	-	AA31G00555	CO-like
TRINITY_DN9708_c0_g1_i3	493.627	4.95753	0.801614	3.68947	0.000224722	0.00787374	XP_010938774.1	basic 7S globulin	LOC105057778	Elaeis guineensis var. tenera (Oil palm)	aspartic-type endopeptidase activity [GO:0004190]	-	-	-	-	Peaxi162Scf00170g01227.1	FAR1
TRINITY_DN977_c1_g1_i3	1000.06	4.55397	0.499418	5.11388	3.15602e-07	2.99873e-05	XP_010934250.1	protein NRT1/ PTR FAMILY 5.2	LOC105054446	Elaeis guineensis var. tenera (Oil palm)	transmembrane transporter activity [GO:0022857]	integral component of membrane [GO:0016021]	-	-	-	GSMUA_Achr10P22520_001	TALE
TRINITY_DN9853_c0_g1_i2	1308.4	4.53216	0.52602	4.81381	1.48077e-06	0.000116996	RWW17972.1	Abhydrolase_3 domain-containing protein	GW17_00018070	Ensete ventricosum (Abyssinian banana) (Musa ensete)	hydrolase activity [GO:0016787]	-	-	-	-	ORUFI12G02480.1	NAC
TRINITY_DN8409_c0_g1_i1	2373.44	3.1048	0.267201	4.13472	3.5539e-05	0.00171161	XP_020254563.1	-	-	-	-	-	-	-	-	XP_010931442.1	NAC
TRINITY_DN25318_c0_g2_i2	782.096	3.06639	0.337633	3.15844	0.00158617	0.0385611	XP_020270658.1	-	-	-	-	-	-	-	-	estExt_fgenesh3_pg.C_130070	SBP
TRINITY_DN988_c1_g1_i11	5619.84	4.61069	0.361784	7.21616	5.34751e-13	1.6408e-10	XP_019703583.1	protein NRT1/ PTR FAMILY 2.9	LOC105054030	Elaeis guineensis var. tenera (Oil palm)	transmembrane transporter activity [GO:0022857]	integral component of membrane [GO:0016021]	-	-	-	mrna00620.1-v1.0-hybrid	BBR-BPC
TRINITY_DN4301_c0_g2_i1	1833.04	3.01379	0.316187	3.20631	0.00134449	0.0338038	XP_008806562.1	-	-	-	-	-	-	-	O	-	-
TRINITY_DN8409_c0_g2_i1	2392.72	3.01236	0.302092	3.35118	0.000804677	0.0220581	XP_020254563.1	-	-	-	-	-	-	-	-	XP_010931442.1	NAC
TRINITY_DN6823_c0_g1_i2	1439.23	2.96481	0.306668	3.1461	0.00165461	0.0397962	XP_020259548.1	-	-	-	-	-	-	-	-	EPS67213.1	NAC
TRINITY_DN665_c0_g2_i1	3741.01	2.90168	0.259577	3.47365	0.000513424	0.0152646	XP_020257982.1	-	-	-	-	-	-	-	-	Zjn_sc00028.1.g03130.1.am.mk	NAC
TRINITY_DN9965_c0_g1_i1	1489.71	3.43949	0.429683	3.35011	0.000807792	0.0221159	XP_002282373.1	Cytidine deaminase 1	CDA1_0 CK203_013689	Vitis vinifera (Grape)	cytidine deaminase activity [GO:0004126]; zinc ion binding [GO:0008270]	-	-	-	-	-	-
TRINITY_DN22563_c3_g1_i1							-	-	-	-	-	-	-	-	-	-	-

## Sheet: Afr_downregulated
TranscriptID	baseMean	log2FoldChange	lfcSE	stat	pvalue	padj	nrdb	Protein names	Gene names	Organism	Gene ontology (molecular function)	Gene ontology (cellular component)	Gene ontology (biological process)	Pathway	COG Functional cat.	TFDB_ID	TFDB_Family
TRINITY_DN1022_c2_g2_i3	59.4381	-5.68765	1.40027	-2.63352	0.00845043	0.0434954	-	-	-	-	-	-	-	-	-	-	-
TRINITY_DN102801_c0_g2_i1	90.5343	-4.83816	1.00025	-2.83747	0.00454731	0.0246939	-	-	-	-	-	-	-	-	-	-	-
TRINITY_DN10292_c0_g1_i2	637.617	-3.81413	0.659674	-2.75003	0.00595891	0.0316273	ONK74413.1	BHLH domain-containing protein	A4U43_C03F5960	Asparagus officinalis (Garden asparagus)	protein dimerization activity [GO:0046983]	nucleus [GO:0005634]	-	-	K	XP_010906815.1	bHLH
TRINITY_DN10302_c0_g1_i3	963.288	-3.63638	0.498906	-3.27993	0.00103832	0.0063756	QFU95050.1	BHLH transcription factor	B1	Allium cepa (Onion)	protein dimerization activity [GO:0046983]	-	-	-	-	XP_010918535.1	bHLH
TRINITY_DN10463_c0_g1_i46	6770.44	-4.00319	0.646032	-3.10076	0.00193022	0.0112596	XP_020244167.1	-	-	-	-	-	-	-	-	-	-
TRINITY_DN106027_c0_g1_i3	1001.72	-5.26395	1.01922	-3.20241	0.00136282	0.00818951	-	-	-	-	-	-	-	-	-	-	-
TRINITY_DN10649_c0_g1_i2	2450.73	-3.48186	0.487916	-3.03711	0.00238856	0.013691	XP_020255162.1	-	-	-	-	-	-	-	-	-	-
TRINITY_DN10806_c0_g1_i2	162.124	-23.3083	4.78502	-4.45313	8.46263e-06	7.10158e-05	-	-	-	-	-	-	-	-	-	-	-
TRINITY_DN109677_c0_g2_i1	8795.8	-3.41947	0.535388	-2.65128	0.00801872	0.0414603	XP_018433033.1	Glyceraldehyde-3-phosphate dehydrogenase (EC 1.2.1.-)	LOC108805608	Raphanus sativus (Radish) (Raphanus raphanistrum var. sativus)	NAD binding [GO:0051287]; NADP binding [GO:0050661]; oxidoreductase activity, acting on the aldehyde or oxo group of donors, NAD or NADP as acceptor [GO:0016620]	-	glucose metabolic process [GO:0006006]	-	-	-	-
TRINITY_DN11_c0_g1_i11	343.874	-7.96323	1.15199	-5.17648	2.26112e-07	2.45766e-06	-	-	-	-	-	-	-	-	-	-	-
TRINITY_DN1105_c0_g1_i13	281.448	-5.22255	1.19861	-2.68857	0.00717581	0.0374599	XP_008794165.1	-	-	-	-	-	-	-	-	-	-
TRINITY_DN11119_c0_g1_i3	81.5778	-5.59237	1.22987	-2.92095	0.00348971	0.0193691	-	-	-	-	-	-	-	-	-	-	-
TRINITY_DN112347_c0_g1_i1	43.8307	-8.71739	2.02003	-3.32539	0.000882939	0.00548938	-	-	-	-	-	-	-	-	-	-	-
TRINITY_DN1142_c0_g1_i1	93.9097	-6.40668	1.3994	-3.14899	0.00163838	0.00968015	-	-	-	-	-	-	-	-	-	-	-
TRINITY_DN11605_c0_g2_i1	593.273	-3.86547	0.548962	-3.39817	0.000678383	0.00430057	-	-	-	-	-	-	-	-	-	-	-
TRINITY_DN11644_c0_g1_i4	93.9585	-5.51473	1.06385	-3.30378	0.000953893	0.00589838	-	-	-	-	-	-	-	-	L	PK03054.1	HD-ZIP
TRINITY_DN11659_c0_g1_i2	181.155	-6.28048	0.941442	-4.54673	5.44868e-06	4.72252e-05	XP_020249125.1	-	-	-	-	-	-	-	-	PDK_30s867521g002	TALE
TRINITY_DN11902_c0_g1_i5	60.2055	-9.17648	1.95382	-3.67305	0.000239674	0.0016366	-	-	-	-	-	-	-	-	-	-	-
TRINITY_DN119336_c0_g1_i1	212.305	-5.9728	0.996924	-3.98506	6.7464e-05	0.000500404	XP_020277022.1	-	-	-	-	-	-	-	-	Bradi3g42627.5.p	ERF
TRINITY_DN119608_c0_g1_i1	46.1263	-8.79057	2.24081	-3.03041	0.0024422	0.013963	-	-	-	-	-	-	-	-	-	-	-
TRINITY_DN11997_c0_g1_i1	127.405	-5.78857	1.18165	-3.20618	0.0013451	0.0080888	-	-	-	-	-	-	-	-	-	Rsa1.0_04342.1_g00002.1	LBD
TRINITY_DN12023_c1_g1_i1	119.929	-4.68673	1.00472	-2.6741	0.007493	0.0389089	XP_020260680.1	-	-	-	-	-	-	-	-	Zjn_sc00023.1.g02100.1.am.mk	G2-like
TRINITY_DN12202_c0_g1_i7	92.4027	-7.3152	1.42749	-3.72346	0.000196514	0.00136036	-	-	-	-	-	-	-	-	-	-	-
TRINITY_DN126199_c0_g1_i1	2028.47	-3.89772	0.530566	-3.57679	0.000347842	0.00230912	-	-	-	-	-	-	-	-	-	-	-
TRINITY_DN12650_c0_g1_i1	233.11	-4.9224	0.90572	-3.2266	0.00125269	0.00757079	-	-	-	-	-	-	-	-	-	-	-
TRINITY_DN12692_c0_g1_i1	83.5727	-6.18712	1.14939	-3.6429	0.000269589	0.00182522	XP_004230996.1	-	-	-	-	-	-	-	-	GRMZM5G899865_P01	bHLH
TRINITY_DN13000_c0_g1_i1	103.431	-5.2895	0.981888	-3.35018	0.0008076	0.00505726	-	-	-	-	-	-	-	-	-	-	-
TRINITY_DN13015_c0_g1_i1	120.253	-5.36405	0.915058	-3.67633	0.000236618	0.00161756	PON65068.1	Basic helix-loop-helix transcription factor	PanBHLH32 PanWU01x14_119850	Parasponia andersonii (Sponia andersonii)	protein dimerization activity [GO:0046983]	nucleus [GO:0005634]	-	-	K	mrna09115.1-v1.0-hybrid	bHLH
TRINITY_DN13060_c0_g1_i15	84.8274	-5.18832	0.998999	-3.19152	0.00141528	0.008477	-	-	-	-	-	-	-	-	-	-	-
TRINITY_DN13328_c2_g1_i3	7598.84	-4.79545	0.503647	-5.55042	2.84987e-08	3.73384e-07	-	-	-	-	-	-	-	-	-	-	-
TRINITY_DN13378_c0_g1_i5	347.279	-7.98232	1.26453	-4.73087	2.23559e-06	2.06705e-05	-	-	-	-	-	-	-	-	-	-	-
TRINITY_DN13392_c0_g1_i1	156.532	-23.2595	4.78503	-4.44292	8.87461e-06	7.42664e-05	-	-	-	-	-	-	-	-	-	-	-
TRINITY_DN13417_c0_g1_i10	7950.86	-5.65794	0.773376	-4.72983	2.24709e-06	2.07723e-05	XP_020265880.1	-	-	-	-	-	-	-	G	Lus10007348	MYB_related
TRINITY_DN13494_c0_g1_i5	209.079	-4.35587	0.781294	-3.01534	0.00256689	0.014612	-	-	-	-	-	-	-	-	-	-	-
TRINITY_DN13837_c0_g4_i1	29.9977	-8.17182	2.35131	-2.62484	0.00866897	0.0445172	-	-	-	-	-	-	-	-	-	-	-
TRINITY_DN13953_c0_g2_i1	55.4791	-9.05761	1.91312	-3.68906	0.000225082	0.0015447	-	-	-	-	-	-	-	-	-	-	-
TRINITY_DN13964_c0_g3_i1	31.0417	-8.22038	2.16063	-2.87896	0.00398984	0.0218974	-	-	-	-	-	-	-	-	-	-	-
TRINITY_DN14219_c0_g1_i2	129.781	-8.85244	2.23401	-3.06732	0.00215985	0.012492	-	-	-	-	-	-	-	-	-	-	-
TRINITY_DN1435_c0_g1_i3	21652.2	-3.53059	0.454983	-3.36405	0.00076807	0.00482925	XP_020089306.1	Photosystem II 22 kDa protein, chloroplastic	LOC109710908 ACMD2_20187	Ananas comosus (Pineapple) (Ananas ananas)	mRNA binding [GO:0003729]; protein domain specific binding [GO:0019904]	chloroplast thylakoid membrane [GO:0009535]	nonphotochemical quenching [GO:0010196]; response to karrikin [GO:0080167]; thylakoid membrane organization [GO:0010027]	-	-	-	-
TRINITY_DN14395_c0_g1_i2	118.92	-22.8785	2.97861	-7.00947	2.39215e-12	9.80714e-11	-	-	-	-	-	-	-	-	-	-	-
TRINITY_DN14399_c0_g1_i1	142.248	-7.99287	1.37834	-4.34788	1.37458e-05	0.000111947	-	-	-	-	-	-	-	-	-	-	-
TRINITY_DN14598_c0_g1_i2	78.7268	-22.2868	3.07976	-6.58715	4.4836e-11	1.21443e-09	-	-	-	-	-	-	-	-	-	-	-
TRINITY_DN14610_c0_g1_i3	146.61	-10.4603	1.75194	-4.8291	1.37149e-06	1.31354e-05	-	-	-	-	-	-	-	-	-	-	-
TRINITY_DN14755_c1_g1_i4	33.734	-8.34099	2.21045	-2.86864	0.00412243	0.0225606	-	-	-	-	-	-	-	-	-	-	-
TRINITY_DN14838_c0_g1_i1	295.107	-6.35497	1.29589	-3.36059	0.000777758	0.00488508	-	-	-	-	-	-	-	-	-	-	-
TRINITY_DN152386_c0_g1_i1	106.408	-8.54157	1.79234	-3.64974	0.000262509	0.00178015	XP_020276821.1	-	-	-	-	-	-	-	-	-	-
TRINITY_DN1535_c1_g5_i1	87.761	-22.4547	3.04941	-6.70777	1.97615e-11	6.0318e-10	-	-	-	-	-	-	-	-	-	-	-
TRINITY_DN15466_c0_g1_i1	61.0065	-9.19563	1.99258	-3.61121	0.00030477	0.00204214	-	-	-	-	-	-	-	-	-	-	-
TRINITY_DN15561_c0_g6_i1	74.2777	-9.47898	1.81981	-4.10976	3.96067e-05	0.000304918	-	-	-	-	-	-	-	-	-	-	-
TRINITY_DN15695_c1_g1_i2	73.2011	-6.97291	1.50184	-3.31121	0.000928948	0.00575171	XP_020275042.1	-	-	-	-	-	-	-	S	KN538722.1_FGP037	HB-PHD
TRINITY_DN15774_c0_g1_i1	32.6132	-8.29156	2.13228	-2.95062	0.0031714	0.0177423	-	-	-	-	-	-	-	-	-	-	-
TRINITY_DN15792_c0_g1_i1	120.415	-4.6922	0.891766	-3.01895	0.00253652	0.0144568	-	-	-	-	-	-	-	-	-	-	-
TRINITY_DN15887_c0_g1_i2	162.8	-23.314	4.78502	-4.45432	8.41606e-06	7.07233e-05	-	-	-	-	-	-	-	-	-	-	-
TRINITY_DN16002_c0_g1_i1	251.008	-5.63024	0.983207	-3.69225	0.000222283	0.00152872	-	-	-	-	-	-	-	-	-	-	-
TRINITY_DN16013_c0_g1_i3	78.0509	-5.81446	1.39502	-2.73434	0.0062506	0.033026	XP_020263645.1	-	-	-	-	-	-	-	-	GSMUA_Achr9P20950_001	MIKC_MADS
TRINITY_DN16094_c0_g1_i1	32.1638	-8.27176	2.15132	-2.91531	0.0035534	0.0196993	-	-	-	-	-	-	-	-	-	-	-
TRINITY_DN162034_c0_g1_i1	1172.12	-7.79667	1.58154	-3.66521	0.000247132	0.00168452	-	-	-	-	-	-	-	-	-	-	-
TRINITY_DN16246_c0_g1_i5	3590.45	-4.73417	0.706599	-3.86948	0.000109067	0.000785528	XP_010920791.1	6-phosphofructo-2-kinase/fructose-2, 6-bisphosphatase isoform X1	LOC105044561	Elaeis guineensis var. tenera (Oil palm)	6-phosphofructo-2-kinase activity [GO:0003873]; ATP binding [GO:0005524]; starch binding [GO:2001070]	-	fructose 2,6-bisphosphate metabolic process [GO:0006003]; fructose metabolic process [GO:0006000]	-	-	-	-
TRINITY_DN16309_c0_g1_i2	278.137	-8.96847	1.47502	-4.72431	2.30896e-06	2.12853e-05	-	-	-	-	-	-	-	-	-	-	-
TRINITY_DN1646_c0_g2_i14	130.083	-10.2869	2.26452	-3.65944	0.000252763	0.00171902	-	-	-	-	-	-	-	-	-	-	-
TRINITY_DN16492_c1_g1_i1	43.772	-8.71643	2.02355	-3.31913	0.000902971	0.00560484	-	-	-	-	-	-	-	-	-	-	-
TRINITY_DN16611_c1_g1_i3	201.611	-4.82983	0.952631	-2.97054	0.00297279	0.0167176	-	-	-	-	-	-	-	-	-	-	-
TRINITY_DN16738_c0_g1_i1	30.7035	-8.20529	2.29142	-2.70805	0.00676802	0.0354846	-	-	-	-	-	-	-	-	L	PK03054.1	HD-ZIP
TRINITY_DN16804_c0_g1_i1	44.5888	-8.74335	2.06968	-3.25816	0.00112139	0.00683399	-	-	-	-	-	-	-	-	S	-	-
TRINITY_DN169_c0_g1_i1	209.149	-3.9699	0.697709	-2.82338	0.00475199	0.0256864	ONK58878.1	-	-	-	-	-	-	-	-	-	-
TRINITY_DN169_c0_g3_i1	72.9213	-5.62978	1.23056	-2.94971	0.00318072	0.0177826	ONK58878.1	-	-	-	-	-	-	-	-	-	-
TRINITY_DN1726_c0_g3_i1	96.3256	-9.85381	1.75723	-4.46943	7.8427e-06	6.62612e-05	EEC73710.1	Uncharacterized protein	OsI_08312	Oryza sativa subsp. indica (Rice)	GTPase activity [GO:0003924]; GTP binding [GO:0005525]	-	-	-	-	-	-
TRINITY_DN18034_c1_g3_i2	192.249	-7.40068	1.04194	-5.18329	2.18005e-07	2.37997e-06	XP_008811620.1	-	-	-	-	-	-	-	CG	PH01002606G0040	HSF
TRINITY_DN18034_c1_g4_i1	103.388	-9.956	1.74366	-4.56281	5.0474e-06	4.40092e-05	XP_008811620.1	-	-	-	-	-	-	-	-	Sme2.5_06310.1_g00004.1	WRKY
TRINITY_DN18101_c0_g1_i2	975.33	-3.7159	0.539601	-3.17994	0.00147306	0.00877581	XP_020266143.1	-	-	-	-	-	-	-	-	-	-
TRINITY_DN18104_c0_g2_i2	114.96	-10.1095	1.78094	-4.55347	5.27672e-06	4.58195e-05	-	-	-	-	-	-	-	-	-	-	-
TRINITY_DN18294_c0_g1_i4	4220.81	-4.61161	0.647861	-4.03113	5.55091e-05	0.000416857	AQX44177.1	Photosynthetic NDH subcomplex L 2	2 PQL1	Apostasia odorata	calcium ion binding [GO:0005509]	extrinsic component of membrane [GO:0019898]; photosystem II oxygen evolving complex [GO:0009654]	photosynthesis [GO:0015979]	-	-	-	-
TRINITY_DN18728_c0_g1_i1	2466.96	-3.34809	0.488709	-2.75847	0.0058072	0.0308687	-	-	-	-	-	-	-	-	-	-	-
TRINITY_DN19137_c0_g1_i2	109.927	-22.7669	3.02845	-6.85729	7.01808e-12	2.47994e-10	-	-	-	-	-	-	-	-	-	-	-
TRINITY_DN19385_c0_g1_i1	25.2053	-7.91995	2.28229	-2.59386	0.00949048	0.0483711	-	-	-	-	-	-	-	-	-	-	-
TRINITY_DN19387_c0_g1_i2	4457.61	-4.47741	0.606469	-4.08497	4.40826e-05	0.000336492	ONK74364.1	Uncharacterized protein	A4U43_C03F5470	Asparagus officinalis (Garden asparagus)	-	-	-	-	-	-	-
TRINITY_DN19570_c0_g1_i16	182.195	-6.35179	1.044	-4.16838	3.06777e-05	0.000239318	-	-	-	-	-	-	-	-	-	-	-
TRINITY_DN19711_c0_g1_i8	151.059	-23.2076	4.78504	-4.43207	9.3332e-06	7.79187e-05	-	-	-	-	-	-	-	-	-	-	-
TRINITY_DN19783_c0_g2_i1	55.9465	-9.07082	2.15807	-3.27646	0.00105117	0.00644892	-	-	-	-	-	-	-	-	-	-	-
TRINITY_DN19874_c0_g1_i1	36.9699	-8.47125	2.31179	-2.79924	0.00512238	0.0275194	-	-	-	-	-	-	-	-	-	-	-
TRINITY_DN2031_c0_g1_i1	9813.09	-5.23437	1.20437	-2.68553	0.00724152	0.0377329	-	-	-	-	-	-	-	-	-	-	-
TRINITY_DN20331_c2_g1_i1	38.028	-7.07088	1.93305	-2.62325	0.0087095	0.0446981	-	-	-	-	-	-	-	-	-	-	-
TRINITY_DN20548_c0_g1_i3	52.0922	-8.96614	2.32495	-2.99625	0.00273322	0.015492	-	-	-	-	-	-	-	-	O	-	-
TRINITY_DN20549_c0_g1_i4	16624.9	-3.98664	0.629769	-3.15455	0.00160744	0.00951332	XP_023522081.1	-	-	-	-	-	-	-	-	-	-
TRINITY_DN20697_c0_g1_i12	30.3703	-8.18775	2.24504	-2.75619	0.00584783	0.0310651	-	-	-	-	-	-	-	-	-	-	-
TRINITY_DN20912_c0_g2_i2	36.413	-8.45069	2.08472	-3.09427	0.00197295	0.011485	-	-	-	-	-	-	-	-	-	-	-
TRINITY_DN21161_c1_g1_i9	150.094	-5.76884	1.32556	-2.84321	0.00446622	0.0242753	-	-	-	-	-	-	-	-	-	-	-
TRINITY_DN222_c1_g1_i10	47.0431	-8.82033	1.98636	-3.43358	0.000595675	0.00381057	-	-	-	-	-	-	-	-	-	-	-
TRINITY_DN22506_c0_g1_i1	331.403	-5.51044	0.717118	-4.89521	9.81984e-07	9.62317e-06	XP_020270035.1	-	-	-	-	-	-	-	K	PDK_30s856251g007	MYB_related
TRINITY_DN2264_c0_g2_i2	83.6624	-6.59586	1.30017	-3.53481	0.000408071	0.00267905	-	-	-	-	-	-	-	-	-	-	-
TRINITY_DN22645_c0_g1_i1	115.644	-10.1172	2.66736	-3.04316	0.00234105	0.0134534	-	-	-	-	-	-	-	-	-	-	-
TRINITY_DN227898_c0_g1_i1	70.7721	-9.40965	1.88226	-3.93657	8.26531e-05	0.000605201	-	-	-	-	-	-	-	-	-	-	-
TRINITY_DN231187_c0_g1_i1	26.2005	-7.97507	2.26792	-2.6346	0.00842356	0.043373	-	-	-	-	-	-	-	-	-	-	-
TRINITY_DN235257_c0_g1_i1	43.5511	-8.70785	2.08624	-3.21529	0.00130315	0.00785331	XP_020102613.1	uncharacterized protein LOC109720136 isoform X1	LOC109720136	Ananas comosus (Pineapple) (Ananas ananas)	-	-	-	-	-	Zmw_sc04743.1.g00060.1	MYB
TRINITY_DN23678_c0_g1_i1	63.4353	-9.25044	2.01044	-3.6064	0.000310478	0.0020784	-	-	-	-	-	-	-	-	-	-	-
TRINITY_DN23704_c0_g1_i15	62.7416	-9.23537	1.86541	-3.87871	0.00010501	0.000758255	-	-	-	-	-	-	-	-	-	-	-
TRINITY_DN23932_c0_g1_i1	75.0691	-5.71098	1.12309	-3.30425	0.000952314	0.00588948	XP_020244721.1	-	-	-	-	-	-	-	-	Glyma.13G227100.1.p	ERF
TRINITY_DN2396_c0_g1_i1	281.223	-4.91721	0.737578	-3.95512	7.64976e-05	0.000562568	-	-	-	-	-	-	-	-	-	MDP0000294614	NAC
TRINITY_DN23976_c0_g2_i3	91.45	-9.77906	1.77147	-4.3913	1.12676e-05	9.28569e-05	-	-	-	-	-	-	-	-	-	-	-
TRINITY_DN24103_c1_g1_i1	49.2676	-8.88727	2.56717	-2.68282	0.00730038	0.0380021	-	-	-	-	-	-	-	-	-	-	-
TRINITY_DN24103_c2_g1_i1	42.9843	-8.69067	2.20015	-3.041	0.00235794	0.0135375	-	-	-	-	-	-	-	-	-	-	-
TRINITY_DN24326_c0_g1_i1	284.425	-6.48301	0.874552	-5.12606	2.95867e-07	3.15813e-06	XP_026435361.1	-	-	-	-	-	-	-	-	-	-
TRINITY_DN2454_c1_g1_i2	183.47	-10.7838	1.99723	-4.39798	1.09261e-05	9.02532e-05	-	-	-	-	-	-	-	-	-	-	-
TRINITY_DN2507_c1_g1_i4	168.1	-10.6576	1.8038	-4.79965	1.58941e-06	1.50484e-05	-	-	-	-	-	-	-	-	-	-	-
TRINITY_DN2518_c0_g2_i1	91.6458	-22.5146	3.07232	-6.67723	2.43508e-11	7.16559e-10	-	-	-	-	-	-	-	-	-	-	-
TRINITY_DN2545_c2_g1_i1	119.104	-22.7031	2.9783	-6.95132	3.61885e-12	1.39811e-10	-	-	-	-	-	-	-	-	-	-	-
TRINITY_DN2573_c2_g1_i2	66.7832	-9.3252	1.85316	-3.95281	7.72387e-05	0.000567623	-	-	-	-	-	-	-	-	-	-	-
TRINITY_DN2577_c2_g1_i2	261.973	-4.57902	0.806462	-3.19794	0.00138413	0.00830811	XP_020255098.1	-	-	-	-	-	-	-	Q	-	-
TRINITY_DN2591_c0_g1_i1	616.502	-3.60172	0.525551	-3.0477	0.00230597	0.0132699	-	-	-	-	-	-	-	-	-	-	-
TRINITY_DN2591_c0_g2_i1	676.432	-3.61484	0.554983	-2.90971	0.00361764	0.0200261	-	-	-	-	-	-	-	-	-	-	-
TRINITY_DN26339_c0_g1_i3	4089.02	-4.27674	0.687902	-3.30969	0.000934008	0.00578135	APU54664.1	Chloroplastic early light-induced protein	ELIPa	Crocus sativus (Saffron)	-	plastid [GO:0009536]	-	-	-	Zmw_sc05456.1.g00030.1	HSF
TRINITY_DN266_c4_g1_i1	41.6426	-8.64327	2.08193	-3.19092	0.00141819	0.00848967	-	-	-	-	-	-	-	-	-	-	-
TRINITY_DN26730_c0_g1_i7	357.298	-3.91049	0.599735	-3.18556	0.00144476	0.00862789	-	-	-	-	-	-	-	-	-	-	-
TRINITY_DN270697_c0_g1_i1	136.146	-23.0589	4.78508	-4.40095	1.07779e-05	8.91163e-05	-	-	-	-	-	-	-	-	-	-	-
TRINITY_DN27512_c2_g1_i1	37.5741	-8.49647	2.15046	-3.02097	0.00251963	0.014376	-	-	-	-	-	-	-	-	-	-	-
TRINITY_DN2790_c0_g1_i10	129.429	-22.9899	4.78509	-4.38652	1.15181e-05	9.47172e-05	-	-	-	-	-	-	-	-	-	-	-
TRINITY_DN2794_c0_g1_i1	198.97	-4.19878	0.77213	-2.84768	0.00440395	0.0239646	XP_019710030.1	cytochrome P450 81D1-like	LOC109506542	Elaeis guineensis var. tenera (Oil palm)	heme binding [GO:0020037]; iron ion binding [GO:0005506]; monooxygenase activity [GO:0004497]; oxidoreductase activity, acting on paired donors, with incorporation or reduction of molecular oxygen [GO:0016705]	-	-	-	-	GSBRNA2T00056359001	GeBP
TRINITY_DN28182_c0_g1_i1	535.173	-5.08977	0.846018	-3.65213	0.000260071	0.00176531	XP_020250047.1	-	-	-	-	-	-	-	-	-	-
TRINITY_DN2838_c0_g2_i1	1119.36	-7.60731	0.809797	-6.92434	4.38024e-12	1.64121e-10	AAO63020.1	Putative chalcone synthase A	-	Allium cepa (Onion)	transferase activity, transferring acyl groups other than amino-acyl groups [GO:0016747]	-	biosynthetic process [GO:0009058]	-	H	-	-
TRINITY_DN2838_c0_g3_i1	201.566	-5.62987	1.1208	-3.23865	0.00120096	0.00728321	AAO63021.1	Chalcone synthase B	-	Allium cepa (Onion)	transferase activity, transferring acyl groups other than amino-acyl groups [GO:0016747]	-	biosynthetic process [GO:0009058]	-	-	-	-
TRINITY_DN286240_c0_g1_i1	78.358	-22.2938	3.08114	-6.58644	4.50487e-11	1.2194e-09	-	-	-	-	-	-	-	-	-	-	-
TRINITY_DN287209_c0_g1_i1	99.7612	-4.60426	0.919916	-2.83097	0.00464069	0.0251556	XP_020248705.1	-	-	-	-	-	-	-	-	-	-
TRINITY_DN287209_c0_g2_i1	102.934	-5.25152	1.19186	-2.7281	0.00637007	0.0336152	XP_020248705.1	-	-	-	-	-	-	-	-	-	-
TRINITY_DN29086_c0_g1_i1	352.419	-3.84007	0.611182	-3.01068	0.00260662	0.0148122	Q6QHK0.1	-	-	-	-	-	-	-	-	Csa07g061600.1	NAC
TRINITY_DN2918_c2_g3_i1	65.3558	-9.29411	1.85572	-3.93061	8.47311e-05	0.000619235	-	-	-	-	-	-	-	-	-	-	-
TRINITY_DN29279_c0_g1_i5	342.28	-9.25642	1.2541	-5.78617	7.201e-09	1.0741e-07	-	-	-	-	-	-	-	-	L	-	-
TRINITY_DN2936_c0_g1_i10	414.32	-4.6293	0.677548	-3.88061	0.000104195	0.000752881	-	-	-	-	-	-	-	-	-	-	-
TRINITY_DN2945_c0_g1_i1	5029.42	-4.98804	0.45964	-6.50083	7.98769e-11	2.00057e-09	CAC06712.1	Beta-carotene hydroxylase	-	Narcissus pseudonarcissus (Daffodil)	iron ion binding [GO:0005506]; oxidoreductase activity [GO:0016491]	integral component of membrane [GO:0016021]	lipid biosynthetic process [GO:0008610]	-	-	-	-
TRINITY_DN3005_c0_g1_i6	638.703	-4.70343	0.776765	-3.48037	0.000500724	0.00323848	XP_020277134.1	-	-	-	-	-	-	-	K	PDK_30s1011221g001	HSF
TRINITY_DN303493_c0_g1_i1	29.2859	-8.13643	2.19524	-2.79533	0.00518461	0.027836	-	-	-	-	-	-	-	-	-	-	-
TRINITY_DN30392_c0_g2_i2	50.5551	-6.42765	1.61305	-2.7449	0.00605294	0.0320699	-	-	-	-	-	-	-	-	K	-	-
TRINITY_DN30711_c0_g1_i3	26.7695	-8.00623	2.24495	-2.67544	0.00746314	0.0387634	-	-	-	-	-	-	-	-	-	-	-
TRINITY_DN30765_c0_g1_i11	238.242	-6.44287	1.2497	-3.55516	0.000377749	0.00249277	-	-	-	-	-	-	-	-	-	-	-
TRINITY_DN30833_c0_g1_i1	151.142	-10.5043	1.89638	-4.48447	7.30946e-06	6.19552e-05	-	-	-	-	-	-	-	-	-	-	-
TRINITY_DN314_c9_g1_i3	131.094	-23.0077	4.78509	-4.39024	1.13227e-05	9.32743e-05	-	-	-	-	-	-	-	-	-	-	-
TRINITY_DN31509_c0_g1_i4	772.999	-4.15673	0.535302	-4.029	5.60152e-05	0.000420134	-	-	-	-	-	-	-	-	-	-	-
TRINITY_DN3153_c0_g1_i1	100.197	-9.91073	1.74908	-4.52279	6.10298e-06	5.23376e-05	-	-	-	-	-	-	-	-	-	-	-
TRINITY_DN3195_c0_g2_i2	2500.04	-4.02453	0.569018	-3.55793	0.000373783	0.00246852	XP_008788132.1	-	-	-	-	-	-	-	-	Sp_146820_ahao.t1	ARF
TRINITY_DN320853_c0_g1_i1	62.189	-6.80442	1.66106	-2.89237	0.00382345	0.0210527	XP_020243700.1	-	-	-	-	-	-	-	-	PEQU_28155	MYB
TRINITY_DN322605_c0_g1_i1	222.259	-23.6561	4.78494	-4.52589	6.01415e-06	5.16283e-05	-	-	-	-	-	-	-	-	-	-	-
TRINITY_DN32304_c1_g1_i2	63.0247	-9.24264	2.16179	-3.35029	0.000807267	0.00505688	-	-	-	-	-	-	-	-	-	-	-
TRINITY_DN32410_c0_g3_i1	28.6217	-8.10256	2.21945	-2.74958	0.0059671	0.0316628	-	-	-	-	-	-	-	-	-	-	-
TRINITY_DN3294_c2_g1_i3	35.4654	-8.41324	2.21035	-2.90147	0.00371422	0.0204913	-	-	-	-	-	-	-	-	-	-	-
TRINITY_DN3298_c1_g1_i1	44.089	-7.26158	1.88237	-2.79519	0.00518697	0.0278452	-	-	-	-	-	-	-	-	-	FANhyb_rscf00000379.1.g00008.1	bZIP
TRINITY_DN33381_c0_g1_i2	825.513	-5.08491	0.904382	-3.41107	0.000647074	0.00411692	-	-	-	-	-	-	-	-	-	-	-
TRINITY_DN334155_c0_g1_i2	31.1845	-8.22769	2.27182	-2.74128	0.00612001	0.0323968	-	-	-	-	-	-	-	-	S	Rsa1.0_04342.1_g00002.1	LBD
TRINITY_DN33831_c0_g4_i2	856.77	-4.8921	0.575508	-5.02529	5.0267e-07	5.16203e-06	-	-	-	-	-	-	-	-	-	-	-
TRINITY_DN353_c0_g1_i1	881.041	-6.14509	0.857369	-4.83467	1.3337e-06	1.27879e-05	ONK79432.1	Uncharacterized protein	A4U43_C01F6310	Asparagus officinalis (Garden asparagus)	-	-	-	-	-	-	-
TRINITY_DN356_c0_g1_i7	386.594	-4.38454	0.751231	-3.17418	0.00150262	0.00893801	-	-	-	-	-	-	-	-	-	-	-
TRINITY_DN3560_c1_g1_i1	890.696	-3.81136	0.64088	-2.82637	0.00470794	0.0254829	ONK71143.1	S1 motif domain-containing protein	A4U43_C04F5150	Asparagus officinalis (Garden asparagus)	nucleic acid binding [GO:0003676]	-	-	-	-	-	-
TRINITY_DN37328_c3_g1_i1	93.8453	-22.5481	3.03207	-6.77693	1.22756e-11	3.96909e-10	-	-	-	-	-	-	-	-	-	Rsa1.0_04342.1_g00002.1	LBD
TRINITY_DN3735_c0_g1_i5	2179.47	-3.90017	0.55309	-3.43555	0.000591356	0.00378523	XP_020264894.1	-	-	-	-	-	-	-	T	-	-
TRINITY_DN3758_c1_g2_i2	56.0448	-6.64965	1.56359	-2.9737	0.00294231	0.0165638	EXC10726.1	Anthranilate synthase component I-2	L484_025310	Morus notabilis	-	-	biosynthetic process [GO:0009058]	-	-	-	-
TRINITY_DN37653_c0_g1_i1	282.889	-4.08684	0.653631	-3.19268	0.00140957	0.00844884	ONK80625.1	Uncharacterized protein	A4U43_C01F19920	Asparagus officinalis (Garden asparagus)	ATPase-coupled transmembrane transporter activity [GO:0042626]; ATP binding [GO:0005524]	integral component of membrane [GO:0016021]	-	-	-	Rsa1.0_03996.1_g00001.1	MYB_related
TRINITY_DN378266_c0_g1_i1	44.0614	-8.72565	1.99549	-3.37042	0.000750531	0.00472672	-	-	-	-	-	-	-	-	-	-	-
TRINITY_DN3817_c0_g1_i11	8228.96	-4.11915	0.499797	-4.24001	2.2351e-05	0.000177533	-	-	-	-	-	-	-	-	-	XP_010934137.1	bHLH
TRINITY_DN381857_c0_g1_i1	42.7098	-8.67959	2.14937	-3.10771	0.00188546	0.0110205	XP_008803247.1	-	-	-	-	-	-	-	-	CCG025416.1	G2-like
TRINITY_DN3837_c0_g1_i1	143.619	-10.43	1.68965	-4.9892	6.063e-07	6.13374e-06	-	-	-	-	-	-	-	-	-	-	-
TRINITY_DN386082_c0_g1_i2	54.8051	-9.04015	1.90986	-3.68621	0.000227615	0.00156132	-	-	-	-	-	-	-	-	-	-	-
TRINITY_DN398_c0_g3_i1	2392.28	-4.2166	0.483327	-4.58613	4.51546e-06	3.96165e-05	ONK80128.1	TPT domain-containing protein	A4U43_C01F14170	Asparagus officinalis (Garden asparagus)	transmembrane transporter activity [GO:0022857]	chloroplast membrane [GO:0031969]; integral component of membrane [GO:0016021]	-	-	-	KZV22500.1	HB-other
TRINITY_DN39884_c0_g1_i1	63.108	-6.2115	1.60164	-2.6295	0.00855102	0.0439703	-	-	-	-	-	-	-	-	-	-	-
TRINITY_DN41852_c1_g1_i4	26.6876	-8.0029	2.30999	-2.59867	0.00935847	0.047779	-	-	-	-	-	-	-	-	-	-	-
TRINITY_DN4282_c2_g1_i1	262.472	-7.00886	1.64484	-3.0452	0.00232522	0.0133752	CAA06961.1	Chlorophyll a-b binding protein, chloroplastic (Fragment)	CP29	Hordeum vulgare (Barley)	chlorophyll binding [GO:0016168]	chloroplast thylakoid membrane [GO:0009535]; photosystem I [GO:0009522]; photosystem II [GO:0009523]	photosynthesis, light harvesting [GO:0009765]; protein-chromophore linkage [GO:0018298]	-	-	-	-
TRINITY_DN430792_c0_g1_i2	103.913	-22.6879	3.04102	-6.80295	1.02499e-11	3.41881e-10	-	-	-	-	-	-	-	-	-	-	-
TRINITY_DN449487_c0_g1_i1	136.627	-22.1962	4.78507	-4.22067	2.43577e-05	0.000192613	-	-	-	-	-	-	-	-	-	-	-
TRINITY_DN4499_c0_g1_i1	224.627	-4.72341	1.05222	-2.58825	0.00964655	0.0490659	XP_021910510.1	-	-	-	-	-	-	-	-	676732396	bHLH
TRINITY_DN4531_c1_g1_i3	27.5936	-8.05101	2.28013	-2.6538	0.00795899	0.041174	-	-	-	-	-	-	-	-	-	-	-
TRINITY_DN4544_c0_g2_i5	83.9485	-22.384	3.096	-6.584	4.57969e-11	1.23649e-09	-	-	-	-	-	-	-	-	-	-	-
TRINITY_DN4618_c0_g1_i1	1543.05	-3.82377	0.533192	-3.42047	0.000625128	0.0039875	XP_020243870.1	-	-	-	-	-	-	-	-	-	-
TRINITY_DN4659_c0_g1_i1	565.765	-3.46805	0.544103	-2.69812	0.00697331	0.0364749	XP_020275838.1	-	-	-	-	-	-	-	-	XP_010926991.1	Trihelix
TRINITY_DN4674_c0_g2_i3	25.4386	-7.93269	2.27405	-2.60886	0.00908436	0.0464863	-	-	-	-	-	-	-	-	-	-	-
TRINITY_DN469995_c0_g1_i1	86.9033	-7.22531	1.44073	-3.62685	0.0002869	0.00193252	-	-	-	-	-	-	-	-	-	-	-
TRINITY_DN471269_c0_g1_i1	1615.71	-7.26967	0.816767	-6.45186	1.10483e-10	2.63877e-09	XP_020273434.1	-	-	-	-	-	-	-	-	-	-
TRINITY_DN473498_c0_g1_i1	32.0772	-8.267	2.15875	-2.90307	0.00369526	0.0204159	-	-	-	-	-	-	-	-	-	-	-
TRINITY_DN475592_c0_g1_i1	534.621	-4.19862	0.579608	-3.79328	0.000148671	0.00104842	XP_020253495.1	-	-	-	-	-	-	-	-	-	-
TRINITY_DN47898_c2_g1_i4	922.75	-4.07376	0.773146	-2.68224	0.00731308	0.0380635	XP_020091927.1	(S)-2-hydroxy-acid oxidase (EC 1.1.3.15)	LOC109712646	Ananas comosus (Pineapple) (Ananas ananas)	FMN binding [GO:0010181]; long-chain-(S)-2-hydroxy-long-chain-acid oxidase activity [GO:0052853]; medium-chain-(S)-2-hydroxy-acid oxidase activity [GO:0052854]; very-long-chain-(S)-2-hydroxy-acid oxidase activity [GO:0052852]	peroxisome [GO:0005777]	oxidative photosynthetic carbon pathway [GO:0009854]; viral process [GO:0016032]	PATHWAY: Photosynthesis; photorespiration; glycine from 2-phosphoglycolate: step 2/3. {ECO:0000256|ARBA:ARBA00004923}.	-	FANhyb_rscf00000398.1.g00005.1	G2-like
TRINITY_DN4813_c0_g1_i1	1032.22	-4.10753	0.526991	-3.99917	6.35645e-05	0.000472726	XP_018683649.1	-	-	-	-	-	-	-	-	-	-
TRINITY_DN481908_c0_g1_i1	801.758	-6.04236	0.761089	-5.31128	1.08855e-07	1.26483e-06	XP_020268366.1	-	-	-	-	-	-	-	-	PDK_30s856251g007	MYB_related
TRINITY_DN48349_c0_g1_i1	2059.78	-5.0696	0.626919	-4.89633	9.76451e-07	9.57116e-06	-	-	-	-	-	-	-	-	-	-	-
TRINITY_DN48349_c1_g1_i1	751.985	-4.46133	0.610812	-4.0296	5.58725e-05	0.000419287	XP_020256129.1	-	-	-	-	-	-	-	-	Zmw_sc05456.1.g00030.1	HSF
TRINITY_DN4994_c0_g1_i1	3220.46	-4.90655	0.586575	-4.95512	7.22862e-07	7.22127e-06	XP_020257373.1	-	-	-	-	-	-	-	-	-	-
TRINITY_DN5001_c0_g1_i4	339.915	-5.53395	0.844425	-4.18503	2.85126e-05	0.000223335	-	-	-	-	-	-	-	-	-	-	-
TRINITY_DN501339_c0_g1_i1	132.687	-5.55316	0.995179	-3.57037	0.000356482	0.00236202	XP_020251889.1	-	-	-	-	-	-	-	-	GSMUA_Achr1P00070_001	ERF
TRINITY_DN5060_c2_g1_i1	1204.39	-4.10236	0.515122	-4.08129	4.47856e-05	0.000341612	XP_020267432.1	-	-	-	-	-	-	-	-	-	-
TRINITY_DN52454_c0_g1_i2	92.1472	-9.79007	1.7725	-4.39495	1.10796e-05	9.14321e-05	-	-	-	-	-	-	-	-	-	-	-
TRINITY_DN5352_c0_g3_i1	375.349	-4.27468	0.64935	-3.50302	0.000460022	0.00299774	-	-	-	-	-	-	-	-	K	-	-
TRINITY_DN5390_c0_g1_i2	258.083	-4.81663	0.833206	-3.38047	0.000723609	0.00456944	-	-	-	-	-	-	-	-	-	-	-
TRINITY_DN5434_c0_g1_i1	454.717	-5.87232	1.15031	-3.36632	0.000761789	0.00479262	XP_020260745.1	-	-	-	-	-	-	-	-	-	-
TRINITY_DN5497_c1_g1_i1	2767.22	-7.45505	1.81056	-3.0129	0.0025876	0.014718	XP_020251260.1	-	-	-	-	-	-	-	C	Bradi3g42627.5.p	ERF
TRINITY_DN5625_c0_g1_i27	261.485	-5.23986	0.98482	-3.2898	0.00100258	0.00617861	-	-	-	-	-	-	-	-	-	-	-
TRINITY_DN5638_c0_g4_i1	141.863	-5.3896	1.00517	-3.37216	0.000745823	0.00469847	-	-	-	-	-	-	-	-	-	-	-
TRINITY_DN5698_c0_g1_i1	185.484	-4.58509	0.812788	-3.18053	0.00147007	0.00875926	XP_020263644.1	-	-	-	-	-	-	-	C	-	-
TRINITY_DN57054_c0_g5_i1	27.8268	-8.06272	2.22486	-2.72499	0.00643039	0.0339039	-	-	-	-	-	-	-	-	-	-	-
TRINITY_DN578_c2_g1_i1	175.454	-4.38083	0.809276	-2.94192	0.00326182	0.0181927	-	-	-	-	-	-	-	-	-	-	-
TRINITY_DN5929_c0_g5_i1	48.216	-7.41542	1.87172	-2.89328	0.00381244	0.0209975	-	-	-	-	-	-	-	-	-	-	-
TRINITY_DN60743_c1_g3_i3	64.4606	-9.27513	2.04824	-3.55189	0.000382474	0.00252119	-	-	-	-	-	-	-	-	-	-	-
TRINITY_DN609_c0_g1_i2	237.39	-6.40542	0.987884	-4.45945	8.21697e-06	6.91881e-05	-	-	-	-	-	-	-	-	-	XP_010940077.1	MYB_related
TRINITY_DN609_c0_g2_i1	430.429	-7.62423	1.2904	-4.35853	1.30939e-05	0.000106864	XP_010940077.1	protein RADIALIS-like 3 isoform X1	LOC105058750	Elaeis guineensis var. tenera (Oil palm)	DNA-binding transcription factor activity [GO:0003700]	-	-	-	-	XP_010940077.1	MYB_related
TRINITY_DN6185_c0_g1_i6	2374.08	-4.80736	0.926062	-3.0315	0.00243343	0.0139199	RAL52024.1	Non-specific lipid-transfer protein	DM860_016522	Cuscuta australis	lipid binding [GO:0008289]	-	lipid transport [GO:0006869]	-	O	-	-
TRINITY_DN6189_c0_g1_i3	442.542	-4.62236	0.581243	-4.51165	6.43258e-06	5.49188e-05	AUG71565.1	Acyltransferase 2	AT2	Allium cepa (Onion)	transferase activity, transferring acyl groups other than amino-acyl groups [GO:0016747]	-	-	-	-	-	-
TRINITY_DN63272_c0_g1_i2	235.098	-4.68407	1.00271	-2.67682	0.00743248	0.0386231	XP_009118960.1	3-oxoacyl-[acyl-carrier-protein] reductase (EC 1.1.1.100)	BRARA_J00517	Brassica campestris (Field mustard)	3-oxoacyl-[acyl-carrier-protein] reductase (NADPH) activity [GO:0004316]; 3-oxo-glutaryl-[acp] methyl ester reductase activity [GO:0102131]; 3-oxo-pimeloyl-[acp] methyl ester reductase activity [GO:0102132]	chloroplast [GO:0009507]	-	-	-	XP_010558920.1	C2H2
TRINITY_DN6422_c0_g3_i1	89.4809	-21.3175	3.07859	-6.27479	3.5011e-10	7.37729e-09	-	-	-	-	-	-	-	-	-	-	-
TRINITY_DN6437_c1_g1_i4	420.267	-3.83125	0.584828	-3.13126	0.00174059	0.0102482	XP_020267861.1	-	-	-	-	-	-	-	-	XP_010925416.1	GATA
TRINITY_DN6492_c0_g1_i19	327.364	-4.01581	0.752868	-2.67751	0.00741714	0.0385576	XP_010937497.1	Trehalose 6-phosphate phosphatase (EC 3.1.3.12)	LOC105056861	Elaeis guineensis var. tenera (Oil palm)	trehalose-phosphatase activity [GO:0004805]	-	trehalose biosynthetic process [GO:0005992]	PATHWAY: Glycan biosynthesis; trehalose biosynthesis. {ECO:0000256|ARBA:ARBA00005199, ECO:0000256|RuleBase:RU361117}.	G	-	-
TRINITY_DN6581_c0_g1_i3	98.6389	-22.6135	3.01986	-6.82596	8.7342e-12	2.98881e-10	-	-	-	-	-	-	-	-	-	-	-
TRINITY_DN6586_c0_g1_i1	3004.9	-3.22326	0.472126	-2.59097	0.00957064	0.0487267	XP_022775681.1	uncharacterized protein LOC111317516	LOC111317516	Durio zibethinus (Durian)	intramolecular transferase activity, phosphotransferases [GO:0016868]; metal ion binding [GO:0046872]	-	carbohydrate metabolic process [GO:0005975]	-	-	-	-
TRINITY_DN65907_c0_g1_i2	47.0954	-8.82232	2.45611	-2.77769	0.00547465	0.0292556	-	-	-	-	-	-	-	-	-	-	-
TRINITY_DN6611_c0_g1_i6	124.028	-5.77642	1.13333	-3.33213	0.00086183	0.00536921	-	-	-	-	-	-	-	-	-	-	-
TRINITY_DN66376_c1_g2_i1	41.5801	-8.64264	2.56634	-2.58837	0.00964309	0.0490542	-	-	-	-	-	-	-	-	-	-	-
TRINITY_DN67127_c0_g2_i3	34.3128	-8.36483	2.10594	-3.02231	0.0025085	0.0143183	-	-	-	-	-	-	-	-	-	-	-
TRINITY_DN67457_c3_g1_i4	724.31	-4.17708	0.809405	-2.68972	0.00715114	0.0373357	XP_008796136.1	-	-	-	-	-	-	-	K	XP_010933626.1	HD-ZIP
TRINITY_DN675_c0_g1_i1	958.06	-4.56618	0.678708	-3.78098	0.000156212	0.00109811	-	-	-	-	-	-	-	-	-	-	-
TRINITY_DN67901_c0_g1_i1	115.175	-10.1122	1.82625	-4.44202	8.91182e-06	7.45187e-05	-	-	-	-	-	-	-	-	-	-	-
TRINITY_DN6798_c0_g1_i5	5879.82	-5.27347	1.05405	-3.1056	0.00189891	0.0110922	XP_020269864.1	-	-	-	-	-	-	-	-	-	-
TRINITY_DN6807_c0_g1_i2	69.6719	-9.38724	1.98544	-3.72071	0.00019866	0.00137454	-	-	-	-	-	-	-	-	-	-	-
TRINITY_DN6808_c0_g3_i2	1307.69	-3.87731	0.701112	-2.67762	0.00741478	0.0385501	-	-	-	-	-	-	-	-	-	-	-
TRINITY_DN682_c0_g1_i28	225.409	-4.02296	0.71012	-2.84876	0.00438905	0.0238897	XP_020267873.1	-	-	-	-	-	-	-	-	KFK41460.1	NAC
TRINITY_DN6825_c0_g1_i1	150.171	-4.6669	0.893002	-2.98645	0.00282241	0.015944	-	-	-	-	-	-	-	-	-	-	-
TRINITY_DN6886_c0_g1_i14	895.687	-3.42173	0.515196	-2.75959	0.00578739	0.030775	XP_020270450.1	-	-	-	-	-	-	-	-	-	-
TRINITY_DN7052_c0_g1_i3	25777	-4.2831	0.678668	-3.36408	0.000767988	0.00482925	XP_022766664.1	Magnesium chelatase (EC 6.6.1.1)	LOC111311505	Durio zibethinus (Durian)	ATP binding [GO:0005524]; magnesium chelatase activity [GO:0016851]	-	chlorophyll biosynthetic process [GO:0015995]; photosynthesis [GO:0015979]	PATHWAY: Porphyrin-containing compound metabolism. {ECO:0000256|ARBA:ARBA00023444}.	-	-	-
TRINITY_DN7108_c0_g1_i23	156.017	-4.67986	0.839822	-3.19099	0.00141788	0.00848899	AGO81838.1	FT-like protein (FT1)	-	Allium cepa (Onion)	-	-	-	-	-	Zmw_sc06576.1.g00010.1	Nin-like
TRINITY_DN7128_c0_g1_i4	40.076	-8.58926	2.07338	-3.17802	0.00148282	0.00882525	-	-	-	-	-	-	-	-	-	-	-
TRINITY_DN73604_c1_g2_i1	29.463	-8.1447	2.185	-2.81222	0.00492005	0.0265236	-	-	-	-	-	-	-	-	-	-	-
TRINITY_DN7362_c0_g1_i1	598.81	-4.06183	0.646364	-3.1899	0.00142323	0.008515	XP_020253153.1	-	-	-	-	-	-	-	-	Peaxi162Scf00045g01644.1	B3
TRINITY_DN7466_c3_g1_i9	150.632	-23.2054	4.78504	-4.43159	9.35386e-06	7.80758e-05	-	-	-	-	-	-	-	-	-	-	-
TRINITY_DN77090_c0_g1_i2	379.837	-3.59069	0.575539	-2.76382	0.00571287	0.0304017	XP_029118917.1	-	-	-	-	-	-	-	-	-	-
TRINITY_DN7932_c1_g1_i14	76.3181	-5.6948	1.31563	-2.8084	0.00497883	0.0268302	-	-	-	-	-	-	-	-	-	-	-
TRINITY_DN7991_c0_g1_i2	82.0242	-22.3587	3.10257	-6.56188	5.31346e-11	1.4076e-09	-	-	-	-	-	-	-	-	-	-	-
TRINITY_DN8130_c0_g1_i8	53.6646	-9.01042	1.95446	-3.58689	0.000334646	0.00222642	-	-	-	-	-	-	-	-	-	-	-
TRINITY_DN82471_c0_g3_i2	127.972	-10.2634	1.72732	-4.78393	1.719e-06	1.61919e-05	-	-	-	-	-	-	-	-	-	-	-
TRINITY_DN8260_c0_g1_i11	3030.93	-4.17396	0.528504	-4.11343	3.89829e-05	0.000300225	XP_020264808.1	-	-	-	-	-	-	-	-	cra_locus_5362_iso_4	MYB_related
TRINITY_DN82762_c0_g1_i1	65.7534	-5.83462	1.23564	-3.10334	0.00191352	0.0111729	GAY69100.1	L-ascorbate peroxidase (EC 1.11.1.11) (Fragment)	CUMW_269420	Citrus unshiu (Satsuma mandarin) (Citrus nobilis var. unshiu)	heme binding [GO:0020037]; L-ascorbate peroxidase activity [GO:0016688]; metal ion binding [GO:0046872]	-	response to oxidative stress [GO:0006979]	-	-	PH01001490G0340	MYB_related
TRINITY_DN8478_c0_g1_i3	96.6394	-9.85832	1.76451	-4.45355	8.44628e-06	7.09209e-05	-	-	-	-	-	-	-	-	-	Rsa1.0_00424.1_g00007.1	C2H2
TRINITY_DN8708_c3_g2_i1	59.8383	-9.16646	2.77326	-2.58413	0.00976264	0.0496264	-	-	-	-	-	-	-	-	-	-	-
TRINITY_DN8716_c1_g3_i2	55.0954	-9.04855	2.47856	-2.8438	0.00445787	0.0242362	-	-	-	-	-	-	-	-	-	-	-
TRINITY_DN8759_c0_g1_i1	120.03	-22.8897	3.00943	-6.94141	3.88194e-12	1.48481e-10	-	-	-	-	-	-	-	-	-	-	-
TRINITY_DN8946_c0_g2_i1	52.689	-5.94526	1.35271	-2.91655	0.00353922	0.0196258	-	-	-	-	-	-	-	-	-	-	-
TRINITY_DN9044_c11_g1_i1	4992.94	-4.29329	0.559414	-4.09945	4.14132e-05	0.000317898	A9SMC8.1	-	-	-	-	-	-	-	H	-	-
TRINITY_DN9116_c0_g1_i1	1236.65	-4.43892	0.851054	-2.86576	0.00416006	0.022746	BAG32267.1	Gibberellin 3-oxidase	GA3ox1	Allium fistulosum (Welsh onion)	metal ion binding [GO:0046872]; oxidoreductase activity [GO:0016491]	-	-	-	-	676709864	STAT
TRINITY_DN915_c0_g1_i1	373.208	-7.37725	0.868619	-6.19058	5.99444e-10	1.17898e-08	XP_020215519.1	-	-	-	-	-	-	-	-	C.cajan_23240	NF-YB
TRINITY_DN9216_c0_g1_i2	80.3404	-22.3307	3.10857	-6.54021	6.14338e-11	1.58568e-09	-	-	-	-	-	-	-	-	-	-	-
TRINITY_DN9563_c5_g1_i1	98.862	-22.5431	3.05335	-6.72807	1.71928e-11	5.35004e-10	-	-	-	-	-	-	-	-	-	-	-
TRINITY_DN9647_c0_g4_i1	137.566	-6.96367	1.42391	-3.48595	0.000490392	0.0031775	-	-	-	-	-	-	-	-	-	-	-
TRINITY_DN9681_c0_g1_i1	290.02	-5.15309	0.691187	-4.56185	5.0705e-06	4.41833e-05	-	-	-	-	-	-	-	-	-	-	-
TRINITY_DN9785_c0_g1_i16	57.5707	-9.11127	1.89253	-3.75756	0.00017158	0.00119896	-	-	-	-	-	-	-	-	-	-	-
TRINITY_DN9879_c0_g1_i5	51.577	-6.53211	1.62963	-2.78106	0.0054182	0.0289723	-	-	-	-	-	-	-	-	-	-	-
TRINITY_DN9906_c0_g1_i2	88.2782	-22.4625	3.08219	-6.63892	3.15981e-11	8.94299e-10	-	-	-	-	-	-	-	-	-	-	-
TRINITY_DN9957_c1_g1_i1	42.3973	-8.66898	2.16529	-3.07995	0.00207035	0.0120138	-	-	-	-	-	-	-	-	-	-	-

## Sheet: Afr_upregulated
TranscriptID	baseMean	log2FoldChange	lfcSE	stat	pvalue	padj	nrdb	Protein names	Gene names	Organism	Gene ontology (molecular function)	Gene ontology (cellular component)	Gene ontology (biological process)	Pathway	COG Functional cat.	TFDB_ID	TFDB_Family
TRINITY_DN10004_c0_g1_i1	692.174	9.07483	0.85908	8.23536	1.79023e-16	2.5283e-14	XP_008792903.1	-	-	-	-	-	-	-	-	PDK_30s873781g005	C3H
TRINITY_DN10013_c0_g1_i2	25448.9	6.50979	0.595462	7.5736	3.63031e-14	2.76211e-12	XP_008796283.1	-	-	-	-	-	-	-	-	Csa09g050690.1	NF-YC
TRINITY_DN10021_c0_g1_i1	164.466	11.052	1.71138	5.28929	1.22793e-07	1.41414e-06	RYN31900.1	-	-	-	-	-	-	-	-	-	-
TRINITY_DN10028_c0_g3_i1	46.7638	9.23782	2.02438	3.57533	0.000349789	0.00232023	RAR00942.1	-	-	-	-	-	-	-	-	-	-
TRINITY_DN10030_c0_g2_i2	592.409	12.9007	1.66003	6.56655	5.1493e-11	1.37013e-09	RII07252.1	-	-	-	-	-	-	-	-	-	-
TRINITY_DN10030_c1_g1_i1	750.019	13.2409	1.57263	7.14785	8.81488e-13	4.25278e-11	XP_028503425.1	-	-	-	-	-	-	-	-	-	-
TRINITY_DN100318_c0_g1_i1	27.8197	8.48864	2.2939	2.82865	0.00467445	0.0253127	KNG50063.1	-	-	-	-	-	-	-	-	-	-
TRINITY_DN10032_c0_g1_i1	204.196	11.364	1.65121	5.67101	1.41961e-08	1.98103e-07	RYN41123.1	-	-	-	-	-	-	-	-	-	-
TRINITY_DN10033_c0_g1_i1	693.411	8.95469	1.09052	6.3774	1.80124e-10	4.07397e-09	-	-	-	-	-	-	-	-	-	-	-
TRINITY_DN1004_c0_g1_i1	458.818	10.1613	1.51314	5.39365	6.90397e-08	8.30345e-07	RAQ99261.1	-	-	-	-	-	-	-	-	-	-
TRINITY_DN10057_c0_g1_i2	66.0211	9.73544	2.0219	3.82583	0.000130332	0.000927617	PZC95099.1	-	-	-	-	-	-	-	-	-	-
TRINITY_DN1008_c0_g1_i1	48.1184	9.27902	2.64975	2.74706	0.00601321	0.0318714	RAR01734.1	-	-	-	-	-	-	-	-	-	-
TRINITY_DN1008_c0_g2_i1	199.879	11.3333	2.22595	4.19294	2.75365e-05	0.00021589	RAR01734.1	-	-	-	-	-	-	-	-	-	-
TRINITY_DN1008_c1_g1_i1	333.329	12.0711	1.82901	5.5063	3.66449e-08	4.67918e-07	XP_028508693.1	-	-	-	-	-	-	-	-	-	-
TRINITY_DN10082_c0_g1_i2	535.26	11.3074	1.53093	6.07959	1.20488e-09	2.18363e-08	XP_018380635.1	-	-	-	-	-	-	-	-	-	-
TRINITY_DN10089_c0_g1_i1	96.2299	10.2784	1.76671	4.68578	2.78896e-06	2.53322e-05	OWY46764.1	-	-	-	-	-	-	-	-	-	-
TRINITY_DN10089_c0_g2_i1	108.24	10.4485	2.10339	4.01663	5.90375e-05	0.000441235	RAR00302.1	-	-	-	-	-	-	-	-	-	-
TRINITY_DN10090_c0_g1_i2	723.801	13.1896	1.58024	7.08093	1.4319e-12	6.39165e-11	XP_018383538.1	-	-	-	-	-	-	-	-	-	-
TRINITY_DN10097_c0_g1_i1	532.237	12.746	1.5911	6.75382	1.44004e-11	4.57208e-10	XP_018384391.1	-	-	-	-	-	-	-	-	Achn303171	ERF
TRINITY_DN10097_c0_g2_i1	50.6529	9.35314	2.45482	2.99539	0.00274096	0.0155276	KZM24255.1	-	-	-	-	-	-	-	-	Achn303171	ERF
TRINITY_DN10104_c0_g2_i1	91.286	7.67447	1.56487	3.62616	0.000287665	0.00193736	-	-	-	-	-	-	-	-	-	-	-
TRINITY_DN10105_c0_g1_i1	729.075	13.2001	1.61497	6.9352	4.05642e-12	1.54038e-10	KAB2108883.1	-	-	-	-	-	-	-	-	-	-
TRINITY_DN10105_c0_g2_i1	100.142	8.00218	2.06648	2.90454	0.00367792	0.0203336	KNG52518.1	-	-	-	-	-	-	-	-	-	-
TRINITY_DN101199_c0_g2_i1	153.464	10.9519	1.67981	5.32914	9.86815e-08	1.1559e-06	XP_018385640.1	-	-	-	-	-	-	-	-	-	-
TRINITY_DN101199_c0_g3_i1	40.0766	9.01456	2.05418	3.41478	0.000638343	0.00406504	XP_028505672.1	-	-	-	-	-	-	-	-	-	-
TRINITY_DN10122_c0_g1_i3	747.1	10.7513	1.29498	6.75782	1.40084e-11	4.46778e-10	XP_028502217.1	-	-	-	-	-	-	-	-	-	-
TRINITY_DN101248_c0_g2_i1	29.1346	8.55423	2.30213	2.84703	0.00441291	0.0240072	-	-	-	-	-	-	-	-	-	-	-
TRINITY_DN101266_c0_g1_i1	46664.5	7.16744	0.690101	7.48795	6.99574e-14	4.93995e-12	XP_020253182.1	-	-	-	-	-	-	-	-	EPS67213.1	NAC
TRINITY_DN101288_c0_g1_i1	187.486	8.23279	1.14997	5.41996	5.96114e-08	7.26678e-07	XP_020265572.1	-	-	-	-	-	-	-	S	-	-
TRINITY_DN10141_c0_g1_i3	65.6782	9.72785	1.92795	4.00832	6.11525e-05	0.000456315	XP_020256538.1	-	-	-	-	-	-	-	-	-	-
TRINITY_DN101572_c0_g2_i1	974.765	3.58501	0.563444	2.81308	0.00490695	0.0264597	XP_020082682.1	12-oxophytodienoate reductase 1-like	LOC109706314	Ananas comosus (Pineapple) (Ananas ananas)	FMN binding [GO:0010181]; oxidoreductase activity [GO:0016491]	-	fatty acid biosynthetic process [GO:0006633]; oxylipin biosynthetic process [GO:0031408]	-	C	LPERR04G10720.2	NAC
TRINITY_DN10163_c0_g1_i1	686.954	10.7093	1.20382	7.2347	4.66572e-13	2.46274e-11	KAB2107387.1	-	-	-	-	-	-	-	-	-	-
TRINITY_DN10168_c0_g1_i2	554.467	12.805	1.59337	6.78127	1.19125e-11	3.8635e-10	XP_018386312.1	-	-	-	-	-	-	-	-	-	-
TRINITY_DN10177_c0_g1_i4	1054.69	13.7328	1.57303	7.45873	8.73609e-14	5.89295e-12	XP_028502841.1	-	-	-	-	-	-	-	-	-	-
TRINITY_DN10177_c0_g2_i1	67.4647	9.76663	2.16861	3.58138	0.000341786	0.00227071	KNG50213.1	-	-	-	-	-	-	-	-	-	-
TRINITY_DN101772_c0_g1_i1	81.2767	23.4538	3.05694	7.01807	2.2496e-12	9.34073e-11	KZL75503.1	-	-	-	-	-	-	-	-	-	-
TRINITY_DN10180_c0_g1_i1	152.75	10.9454	2.03192	4.40245	1.07038e-05	8.85904e-05	RAR01161.1	-	-	-	-	-	-	-	-	-	-
TRINITY_DN10192_c1_g1_i1	3115.33	4.33937	0.862931	2.71096	0.00670886	0.0352138	PKA62781.1	2-phytyl-1,4-beta-naphthoquinone methyltransferase, chloroplastic (EC 2.1.1.163) (EC 2.1.1.201)	MENG AXF42_Ash020053	Apostasia shenzhenica	2-octaprenyl-6-methoxy-1,4-benzoquinone methylase activity [GO:0043333]; demethylmenaquinone methyltransferase activity [GO:0043770]; S-adenosylmethionine:2-demethylmenaquinol-7 methyltransferase activity [GO:0102955]; S-adenosylmethionine:2-demethylmenaquinol methyltransferase activity [GO:0102094]; S-adenosylmethionine:2-demethylquinol-8 methyltransferase activity [GO:0102027]	integral component of membrane [GO:0016021]	methylation [GO:0032259]	-	-	-	-
TRINITY_DN10194_c0_g2_i1	172.583	6.603	1.02491	4.49114	7.08424e-06	6.01419e-05	XP_018383190.1	-	-	-	-	-	-	-	-	-	-
TRINITY_DN10195_c0_g1_i8	599.827	12.9185	1.59919	6.82751	8.64034e-12	2.96285e-10	RYN76547.1	-	-	-	-	-	-	-	-	-	-
TRINITY_DN102282_c0_g1_i4	84.6818	10.0945	2.12235	3.81394	0.00013677	0.000970166	KNG45363.1	-	-	-	-	-	-	-	-	-	-
TRINITY_DN10232_c0_g1_i1	36.1679	8.86735	2.38807	2.8757	0.00403139	0.0220996	KNG52080.1	-	-	-	-	-	-	-	-	-	-
TRINITY_DN10236_c0_g1_i3	646.061	13.0257	1.57949	6.98053	2.94063e-12	1.17256e-10	XP_018391618.1	-	-	-	-	-	-	-	-	-	-
TRINITY_DN10236_c0_g3_i1	54.5781	9.46087	2.07708	3.592	0.00032815	0.00218665	RAQ99953.1	-	-	-	-	-	-	-	-	-	-
TRINITY_DN10238_c0_g2_i1	91.092	10.1997	1.82662	4.48899	7.15631e-06	6.07172e-05	KNG49531.1	-	-	-	-	-	-	-	-	-	-
TRINITY_DN10239_c0_g1_i1	116.941	6.96955	1.68729	2.94529	0.00322657	0.0180228	RAR04637.1	-	-	-	-	-	-	-	-	-	-
TRINITY_DN10239_c0_g2_i1	1314.56	10.5484	0.999362	8.55387	1.19031e-17	2.09431e-15	KAB2102485.1	-	-	-	-	-	-	-	-	-	-
TRINITY_DN10244_c0_g1_i1	1526.86	14.2665	1.55925	7.86693	3.63446e-15	3.72505e-13	XP_018379367.1	-	-	-	-	-	-	-	-	-	-
TRINITY_DN10248_c0_g1_i1	344.985	12.1206	1.62391	6.23227	4.59723e-10	9.39174e-09	RYN66742.1	-	-	-	-	-	-	-	-	-	-
TRINITY_DN10253_c0_g1_i1	154.658	10.9633	2.11399	4.23998	2.23541e-05	0.000177533	KNG48257.1	-	-	-	-	-	-	-	-	-	-
TRINITY_DN10257_c0_g1_i1	32.4997	8.71307	2.55572	2.62669	0.00862209	0.0443033	RMZ71563.1	-	-	-	-	-	-	-	-	-	-
TRINITY_DN10261_c0_g1_i1	132.392	10.7391	1.99942	4.37081	1.23784e-05	0.000101437	XP_008022558.1	-	-	-	-	-	-	-	-	-	-
TRINITY_DN10261_c0_g2_i1	1073.24	13.7578	1.69019	6.9565	3.48821e-12	1.35328e-10	XP_018389403.1	-	-	-	-	-	-	-	-	-	-
TRINITY_DN102637_c0_g1_i1	115.744	10.5446	1.81791	4.70025	2.59841e-06	2.36931e-05	OWY57150.1	-	-	-	-	-	-	-	-	-	-
TRINITY_DN10267_c0_g1_i2	62.5935	9.65853	2.1946	3.48971	0.000483542	0.00313648	XP_008022186.1	-	-	-	-	-	-	-	-	-	-
TRINITY_DN10267_c0_g2_i2	48.7776	9.2988	2.20189	3.31479	0.000917112	0.00568259	XP_008022186.1	-	-	-	-	-	-	-	-	-	-
TRINITY_DN10267_c0_g3_i1	397.394	12.3246	1.59679	6.46584	1.00736e-10	2.43909e-09	XP_018383375.1	-	-	-	-	-	-	-	-	-	-
TRINITY_DN10267_c0_g4_i1	420.699	12.4068	1.594	6.52874	6.63258e-11	1.69742e-09	XP_018383375.1	-	-	-	-	-	-	-	-	-	-
TRINITY_DN102702_c0_g1_i1	2166.34	4.9405	0.508087	5.78739	7.14885e-09	1.06745e-07	AGT28471.1	9-cis-epoxycarotenoid dioxygenase	-	Narcissus tazetta (Cream narcissus)	metal ion binding [GO:0046872]; oxidoreductase activity, acting on single donors with incorporation of molecular oxygen, incorporation of two atoms of oxygen [GO:0016702]	-	-	-	Q	-	-
TRINITY_DN10277_c0_g3_i1	1771.65	3.51993	0.570706	2.66324	0.00773928	0.0401039	XP_020263758.1	-	-	-	-	-	-	-	-	-	-
TRINITY_DN10288_c0_g1_i4	475.797	12.5844	1.58827	6.66408	2.66331e-11	7.69771e-10	XP_018391181.1	-	-	-	-	-	-	-	-	-	-
TRINITY_DN1029_c0_g3_i1	198.03	11.3199	2.02367	4.60544	4.11593e-06	3.63529e-05	RAR05133.1	-	-	-	-	-	-	-	-	-	-
TRINITY_DN10296_c0_g1_i3	11089.8	4.1865	0.838199	2.60857	0.00909209	0.0465203	XP_008787779.1	-	-	-	-	-	-	-	-	TRAES3BF073600100CFD_t1	NAC
TRINITY_DN10298_c0_g1_i1	478.471	10.2024	1.32738	6.17937	6.43566e-10	1.25119e-08	KAB2109068.1	-	-	-	-	-	-	-	-	-	-
TRINITY_DN10310_c0_g2_i1	2280.18	14.8448	3.59981	3.5682	0.000359438	0.00237937	XP_028502468.1	-	-	-	-	-	-	-	-	-	-
TRINITY_DN10310_c0_g3_i1	48.4513	9.28901	2.53363	2.87691	0.00401594	0.0220292	RAQ98938.1	-	-	-	-	-	-	-	-	-	-
TRINITY_DN10312_c0_g1_i1	45.5774	9.2009	2.30951	3.11793	0.00182126	0.0106859	XP_001930793.1	-	-	-	-	-	-	-	-	-	-
TRINITY_DN10312_c0_g2_i1	47.3735	9.25666	2.15154	3.37278	0.000744147	0.00468931	XP_014082804.1	-	-	-	-	-	-	-	-	-	-
TRINITY_DN10312_c1_g1_i1	1867.8	11.121	0.903954	10.0901	6.10802e-24	3.03439e-21	RYN38359.1	-	-	-	-	-	-	-	-	-	-
TRINITY_DN103163_c1_g1_i1	37.9344	8.93614	2.30231	3.01268	0.00258949	0.0147268	YP_009182158.1	-	-	-	-	-	-	-	-	-	-
TRINITY_DN10319_c0_g1_i1	261.833	9.3406	1.40784	5.21408	1.84736e-07	2.04532e-06	XP_007699549.1	-	-	-	-	-	-	-	-	-	-
TRINITY_DN10331_c0_g1_i1	202.774	4.71405	0.73772	3.67897	0.000234177	0.00160243	XP_020094461.1	glutathione S-transferase U17-like	LOC109714302	Ananas comosus (Pineapple) (Ananas ananas)	transferase activity [GO:0016740]	-	glutathione metabolic process [GO:0006749]	-	-	-	-
TRINITY_DN10341_c0_g1_i2	1363.83	14.1036	1.56828	7.71775	1.184e-14	1.05036e-12	OWY41823.1	-	-	-	-	-	-	-	-	-	-
TRINITY_DN10344_c0_g1_i1	600.447	10.4464	1.2322	6.85474	7.14415e-12	2.51817e-10	RII21613.1	-	-	-	-	-	-	-	-	-	-
TRINITY_DN10344_c0_g2_i1	88.8872	10.1644	2.13702	3.82046	0.000133205	0.000946624	KNG48081.1	-	-	-	-	-	-	-	-	-	-
TRINITY_DN10350_c0_g1_i1	218.186	8.10847	1.27019	4.8091	1.51608e-06	1.44026e-05	XP_020272647.1	-	-	-	-	-	-	-	-	-	-
TRINITY_DN10351_c0_g1_i4	368.826	12.2168	1.7707	5.76992	7.931e-09	1.17017e-07	XP_018388176.1	-	-	-	-	-	-	-	-	-	-
TRINITY_DN10352_c0_g1_i7	92.621	10.2232	1.79738	4.57508	4.76036e-06	4.1644e-05	XP_018384127.1	-	-	-	-	-	-	-	-	-	-
TRINITY_DN10354_c0_g1_i2	61.4167	9.63049	1.88974	4.03786	5.39409e-05	0.00040638	-	-	-	-	-	-	-	-	-	-	-
TRINITY_DN10356_c0_g1_i1	417.091	5.45116	1.11045	3.1079	0.0018842	0.0110154	-	-	-	-	-	-	-	-	-	676720782	FAR1
TRINITY_DN10367_c0_g1_i2	2631.39	15.0517	1.6701	7.81494	5.499e-15	5.33807e-13	RYN17878.1	-	-	-	-	-	-	-	-	-	-
TRINITY_DN10367_c1_g1_i2	33.495	8.75659	2.29477	2.94435	0.00323638	0.0180699	KNG48445.1	-	-	-	-	-	-	-	-	-	-
TRINITY_DN10367_c1_g2_i1	42.2058	9.09005	2.28146	3.10768	0.0018856	0.0110205	KNG48445.1	-	-	-	-	-	-	-	-	-	-
TRINITY_DN10371_c0_g1_i4	390.044	12.2975	1.64089	6.27556	3.48372e-10	7.35168e-09	KAB2105410.1	-	-	-	-	-	-	-	-	-	-
TRINITY_DN10373_c0_g1_i1	37.0181	8.90044	2.07526	3.32509	0.000883904	0.00549376	-	-	-	-	-	-	-	-	-	-	-
TRINITY_DN10379_c1_g1_i2	169.172	11.0927	1.71655	5.29709	1.17662e-07	1.36049e-06	XP_018383320.1	-	-	-	-	-	-	-	-	-	-
TRINITY_DN10383_c0_g1_i1	342.141	9.63255	1.24114	6.14964	7.76575e-10	1.47316e-08	XP_028511189.1	-	-	-	-	-	-	-	-	-	-
TRINITY_DN103867_c0_g1_i3	63.2128	9.67199	1.90267	4.03222	5.52532e-05	0.00041523	-	-	-	-	-	-	-	-	-	-	-
TRINITY_DN10388_c0_g1_i1	124.798	10.6538	2.25215	3.84246	0.000121807	0.000870459	KNG50542.1	-	-	-	-	-	-	-	-	-	-
TRINITY_DN10389_c0_g1_i1	257.157	9.17038	1.59701	4.48989	7.12614e-06	6.04734e-05	RAR08437.1	-	-	-	-	-	-	-	-	mrna27194.1-v1.0-hybrid	bZIP
TRINITY_DN10390_c0_g1_i3	281.772	11.8284	1.64182	5.98629	2.14681e-09	3.6539e-08	RII06475.1	-	-	-	-	-	-	-	-	-	-
TRINITY_DN10390_c0_g4_i1	588.335	12.8906	1.59501	6.82789	8.61713e-12	2.96074e-10	RII06475.1	-	-	-	-	-	-	-	-	-	-
TRINITY_DN10390_c0_g5_i1	97.8979	10.3037	2.15134	3.85976	0.000113498	0.000814526	RII06475.1	-	-	-	-	-	-	-	-	-	-
TRINITY_DN10390_c1_g1_i1	44.1535	9.15468	1.99391	3.58827	0.000332882	0.00221573	KAB2099778.1	-	-	-	-	-	-	-	-	-	-
TRINITY_DN10390_c1_g3_i1	179.709	11.1797	1.66025	5.52909	3.21904e-08	4.15816e-07	KAB2101799.1	-	-	-	-	-	-	-	-	-	-
TRINITY_DN10390_c1_g4_i1	507.137	10.2062	1.21167	6.77264	1.26455e-11	4.07931e-10	XP_018383713.1	-	-	-	-	-	-	-	-	-	-
TRINITY_DN10390_c1_g5_i1	220.837	11.4772	1.68631	5.62004	1.90908e-08	2.59964e-07	KAB2106898.1	-	-	-	-	-	-	-	-	-	-
TRINITY_DN10391_c0_g1_i2	680.89	13.1014	1.57545	7.04653	1.83438e-12	7.83218e-11	KAB2100197.1	-	-	-	-	-	-	-	-	-	-
TRINITY_DN10391_c0_g2_i1	141.465	10.8347	1.97072	4.48299	7.36039e-06	6.23735e-05	RAR14299.1	-	-	-	-	-	-	-	-	-	-
TRINITY_DN103963_c0_g1_i1	266.338	11.7471	1.64255	5.93414	2.95381e-09	4.85334e-08	OWY48508.1	-	-	-	-	-	-	-	-	-	-
TRINITY_DN103979_c0_g1_i2	503.228	12.6653	1.60063	6.66318	2.6796e-11	7.72364e-10	KAB2107674.1	-	-	-	-	-	-	-	-	-	-
TRINITY_DN10399_c0_g2_i1	1479.72	10.7189	1.00107	8.7096	3.04959e-18	6.40672e-16	KAB2106805.1	-	-	-	-	-	-	-	-	-	-
TRINITY_DN10401_c0_g2_i5	744.422	10.8253	1.20469	7.32578	2.37513e-13	1.38147e-11	XP_020245410.1	-	-	-	-	-	-	-	Q	Csa09g009740.1	HSF
TRINITY_DN10405_c0_g1_i4	153.234	24.2534	4.78515	4.65051	3.31109e-06	2.97547e-05	BAF83248.1	-	-	-	-	-	-	-	-	-	-
TRINITY_DN104144_c0_g1_i1	228.282	11.525	1.69738	5.61159	2.00473e-08	2.71413e-07	XP_018391677.1	-	-	-	-	-	-	-	-	-	-
TRINITY_DN10416_c0_g2_i1	81.4421	10.0382	2.07346	3.87673	0.00010587	0.000764068	XP_007693982.1	-	-	-	-	-	-	-	-	-	-
TRINITY_DN10416_c0_g3_i7	5757.87	12.1811	0.887608	11.4703	1.86062e-30	2.01457e-27	YP_009445536.1	-	-	-	-	-	-	-	-	-	-
TRINITY_DN1042_c0_g2_i2	94.473	23.6596	3.01697	7.17924	7.00997e-13	3.51139e-11	NP_990838.1	-	-	-	-	-	-	-	-	-	-
TRINITY_DN10425_c0_g1_i3	143.758	7.5197	1.43699	3.84114	0.000122463	0.000874702	KNG45457.1	-	-	-	-	-	-	-	-	-	-
TRINITY_DN10425_c0_g2_i1	1876.03	14.5636	1.58696	7.91675	2.43791e-15	2.60853e-13	RYN18294.1	-	-	-	-	-	-	-	-	-	-
TRINITY_DN10425_c2_g1_i2	302.453	11.9307	1.61332	6.15545	7.48628e-10	1.42913e-08	OWY48880.1	-	-	-	-	-	-	-	-	-	-
TRINITY_DN104312_c0_g1_i3	287.187	4.86915	1.1082	2.58903	0.00962477	0.0489728	-	-	-	-	-	-	-	-	-	-	-
TRINITY_DN10434_c0_g5_i1	128.407	23.9503	2.93596	7.47636	7.64092e-14	5.27211e-12	-	-	-	-	-	-	-	-	-	-	-
TRINITY_DN1044_c0_g1_i1	190.674	11.2653	1.67968	5.51609	3.46623e-08	4.44484e-07	-	-	-	-	-	-	-	-	-	676777512	ERF
TRINITY_DN104481_c0_g1_i2	130.789	10.7213	1.70329	5.12026	3.05108e-07	3.24938e-06	OAL44299.1	-	-	-	-	-	-	-	-	-	-
TRINITY_DN104502_c0_g1_i1	83.2679	10.0702	1.95492	4.12817	3.65665e-05	0.000282387	-	-	-	-	-	-	-	-	-	-	-
TRINITY_DN104519_c0_g2_i1	101.134	10.3502	1.75249	4.76474	1.89097e-06	1.76973e-05	KAB2101236.1	-	-	-	-	-	-	-	-	-	-
TRINITY_DN104524_c0_g1_i1	201.886	11.3477	1.68394	5.55109	2.83892e-08	3.72064e-07	OWY48146.1	-	-	-	-	-	-	-	-	-	-
TRINITY_DN104540_c0_g1_i1	43.5109	9.13394	2.43025	2.93547	0.0033304	0.0185458	RYN56862.1	-	-	-	-	-	-	-	-	-	-
TRINITY_DN104583_c0_g1_i1	53.1706	9.42225	2.02214	3.67049	0.000242086	0.001652	RYN38486.1	-	-	-	-	-	-	-	-	-	-
TRINITY_DN104592_c0_g1_i2	353.726	9.77024	1.36326	5.69974	1.19988e-08	1.70139e-07	RYN16170.1	-	-	-	-	-	-	-	-	GSMUA_Achr1P17680_001	C2H2
TRINITY_DN104636_c0_g1_i1	110.58	10.4794	2.18571	3.87945	0.000104693	0.000756353	RAR16584.1	-	-	-	-	-	-	-	-	-	-
TRINITY_DN10464_c0_g1_i1	241.936	11.6088	1.65733	5.79773	6.72204e-09	1.00979e-07	KAB2107264.1	-	-	-	-	-	-	-	-	-	-
TRINITY_DN1047_c0_g1_i2	15332.8	14.1008	0.962749	12.569	3.1273e-36	6.01157e-33	KAB2103434.1	-	-	-	-	-	-	-	-	-	-
TRINITY_DN104708_c0_g1_i1	226.667	11.5147	1.67219	5.69	1.27042e-08	1.79358e-07	XP_018382294.1	-	-	-	-	-	-	-	-	CCG017923.1	NAC
TRINITY_DN104709_c0_g1_i1	32.3613	8.70692	2.32723	2.88193	0.00395247	0.021715	RYN26522.1	-	-	-	-	-	-	-	-	-	-
TRINITY_DN104712_c0_g1_i2	305.633	11.9457	1.61893	6.14338	8.07823e-10	1.5249e-08	OWY57853.1	-	-	-	-	-	-	-	-	-	-
TRINITY_DN104739_c0_g1_i1	102.69	10.3725	1.76659	4.73934	2.14411e-06	1.98769e-05	XP_028510635.1	-	-	-	-	-	-	-	-	-	-
TRINITY_DN10477_c0_g2_i2	285.641	8.48321	1.13337	5.72031	1.06333e-08	1.52518e-07	RYN62715.1	-	-	-	-	-	-	-	-	-	-
TRINITY_DN104773_c0_g2_i1	129.198	10.7037	1.71379	5.07862	3.80191e-07	3.98371e-06	RII08314.1	-	-	-	-	-	-	-	-	-	-
TRINITY_DN104804_c0_g1_i1	84.909	10.0981	1.79465	4.51236	6.41099e-06	5.47788e-05	XP_018389366.1	-	-	-	-	-	-	-	-	-	-
TRINITY_DN104969_c0_g1_i3	72.6521	9.87345	1.91938	4.10209	4.09439e-05	0.000314581	RYO65269.1	-	-	-	-	-	-	-	-	-	-
TRINITY_DN104969_c0_g2_i1	40.4687	9.02836	2.14053	3.28347	0.00102539	0.00630174	-	-	-	-	-	-	-	-	-	-	-
TRINITY_DN10498_c0_g1_i4	430.754	10.0486	1.30969	6.14543	7.97481e-10	1.50672e-08	KAB2109774.1	-	-	-	-	-	-	-	-	-	-
TRINITY_DN10499_c0_g1_i2	464.549	8.65183	1.43282	4.64249	3.44233e-06	3.08226e-05	RYN22745.1	-	-	-	-	-	-	-	-	-	-
TRINITY_DN10503_c0_g1_i1	6078.55	13.8585	1.22748	9.66085	4.422e-22	1.69752e-19	XP_018379124.1	-	-	-	-	-	-	-	-	-	-
TRINITY_DN105072_c0_g1_i2	107.946	8.10089	1.90078	3.20968	0.00132882	0.00799662	XP_018391909.1	-	-	-	-	-	-	-	-	KXZ56109.1	HB-other
TRINITY_DN10511_c0_g1_i1	89.085	10.1676	2.09158	3.905	9.42254e-05	0.000684814	KNG48803.1	-	-	-	-	-	-	-	-	-	-
TRINITY_DN105114_c0_g1_i1	96.6256	10.2847	1.79953	4.60384	4.14764e-06	3.66177e-05	RYO64552.1	-	-	-	-	-	-	-	-	-	-
TRINITY_DN10518_c0_g2_i2	117.115	10.5616	1.79551	4.76836	1.85735e-06	1.74096e-05	RII23414.1	-	-	-	-	-	-	-	-	-	-
TRINITY_DN105218_c0_g1_i1	133.329	5.63707	1.12633	3.22914	0.00124165	0.00751377	XP_020246596.1	-	-	-	-	-	-	-	-	-	-
TRINITY_DN1053_c0_g1_i1	565.396	10.3642	1.20621	6.93424	4.0841e-12	1.54811e-10	-	-	-	-	-	-	-	-	-	-	-
TRINITY_DN105303_c0_g1_i2	200.485	11.3377	1.68488	5.54203	2.98982e-08	3.90025e-07	RYN18183.1	-	-	-	-	-	-	-	-	-	-
TRINITY_DN105303_c0_g2_i1	69.6101	9.81167	1.88317	4.14814	3.35188e-05	0.000260327	-	-	-	-	-	-	-	-	-	-	-
TRINITY_DN10533_c0_g1_i1	189.692	11.2579	1.71971	5.38339	7.3095e-08	8.75377e-07	RYO08229.1	-	-	-	-	-	-	-	-	-	-
TRINITY_DN10538_c0_g1_i1	924.636	3.70261	0.501455	3.39534	0.000685422	0.00434258	XP_020264641.1	-	-	-	-	-	-	-	-	Lus10007348	MYB_related
TRINITY_DN10559_c0_g1_i1	76.1124	7.59693	1.93436	2.89343	0.0038106	0.0209901	KNG45683.1	-	-	-	-	-	-	-	-	-	-
TRINITY_DN10567_c0_g1_i2	216.717	11.4498	1.64076	5.75938	8.44211e-09	1.23822e-07	XP_028506513.1	-	-	-	-	-	-	-	-	-	-
TRINITY_DN10574_c0_g2_i3	88.5047	10.1579	1.77671	4.59154	4.39984e-06	3.86745e-05	XP_028502638.1	-	-	-	-	-	-	-	-	-	-
TRINITY_DN10582_c0_g3_i1	1322.38	14.0591	1.55997	7.73031	1.07288e-14	9.61883e-13	XP_028504519.1	-	-	-	-	-	-	-	-	-	-
TRINITY_DN10582_c0_g4_i1	75.2624	9.92442	1.99169	3.97875	6.92799e-05	0.000512613	RAR14366.1	-	-	-	-	-	-	-	-	-	-
TRINITY_DN10588_c0_g1_i3	445.269	12.4887	1.59399	6.58018	4.69878e-11	1.26476e-09	KAB2111705.1	-	-	-	-	-	-	-	-	-	-
TRINITY_DN10588_c0_g2_i1	88.8839	10.1644	2.07817	3.92863	8.54323e-05	0.000624144	RYN43050.1	-	-	-	-	-	-	-	-	-	-
TRINITY_DN10602_c0_g1_i2	26804.4	4.21304	0.752028	2.94276	0.00325297	0.0181529	XP_020253377.1	-	-	-	-	-	-	-	S	Zjn_sc00014.1.g01720.1.am.mk	GeBP
TRINITY_DN106044_c0_g1_i1	207.185	8.02122	1.15589	5.20915	1.89704e-07	2.09538e-06	OWY57932.1	-	-	-	-	-	-	-	-	-	-
TRINITY_DN10608_c0_g1_i3	116.638	10.5563	1.76346	4.85197	1.22242e-06	1.18203e-05	RYN31895.1	-	-	-	-	-	-	-	-	-	-
TRINITY_DN10614_c0_g1_i4	109.357	10.4632	1.74736	4.84343	1.2762e-06	1.22952e-05	RYO65679.1	-	-	-	-	-	-	-	-	-	-
TRINITY_DN106256_c0_g1_i1	120.451	10.6025	1.71621	5.01248	5.37334e-07	5.49129e-06	XP_018379862.1	-	-	-	-	-	-	-	-	-	-
TRINITY_DN106257_c0_g1_i1	79.7085	10.0072	2.10162	3.81002	0.000138957	0.000984517	KNG46508.1	-	-	-	-	-	-	-	-	-	-
TRINITY_DN10630_c0_g1_i4	111.76	7.99099	1.38776	4.31702	1.58153e-05	0.000127644	XP_028509242.1	-	-	-	-	-	-	-	-	-	-
TRINITY_DN106309_c0_g1_i1	137.444	10.793	2.21385	3.97184	7.13184e-05	0.000526773	XP_020573422.1	-	-	-	-	-	-	-	-	-	-
TRINITY_DN1064_c0_g1_i1	2640.97	7.81041	0.706744	8.22138	2.01176e-16	2.78222e-14	PKA45697.1	Sugar carrier protein C	STC AXF42_Ash011038	Apostasia shenzhenica	symporter activity [GO:0015293]	integral component of membrane [GO:0016021]	-	-	-	Bv5_101120_supk.t1	ERF
TRINITY_DN1064_c0_g2_i1	14123.5	5.84876	0.775334	4.964	6.90576e-07	6.9186e-06	XP_010904882.1	sugar transport protein MST3	LOC105032198	Elaeis guineensis var. tenera (Oil palm)	symporter activity [GO:0015293]	integral component of membrane [GO:0016021]	carbohydrate transport [GO:0008643]	-	-	Achn111201	MYB_related
TRINITY_DN1064_c0_g3_i2	9251.23	5.87247	0.722792	5.35766	8.43047e-08	1.00026e-06	PKA45697.1	Sugar carrier protein C	STC AXF42_Ash011038	Apostasia shenzhenica	symporter activity [GO:0015293]	integral component of membrane [GO:0016021]	-	-	U	Bv5_101120_supk.t1	ERF
TRINITY_DN10646_c0_g1_i1	1599.64	4.73324	0.582686	4.69077	2.72185e-06	2.47653e-05	XP_010941432.1	LOW QUALITY PROTEIN: phospholipase A1-Ibeta2, chloroplastic-like	LOC105059714	Elaeis guineensis var. tenera (Oil palm)	-	-	lipid metabolic process [GO:0006629]	-	-	-	-
TRINITY_DN10648_c0_g1_i1	59.8184	9.59313	2.08898	3.63486	0.000278136	0.00187978	RYN40678.1	-	-	-	-	-	-	-	-	-	-
TRINITY_DN1065_c1_g1_i6	1987.48	3.54371	0.57085	2.70424	0.00684611	0.0358629	XP_020265630.1	-	-	-	-	-	-	-	-	312791	bHLH
TRINITY_DN10655_c0_g1_i1	96.7576	10.2868	2.05268	4.03706	5.4125e-05	0.000407404	KNG46012.1	-	-	-	-	-	-	-	-	-	-
TRINITY_DN10656_c0_g1_i5	1267.33	13.9977	1.56942	7.64468	2.09458e-14	1.72413e-12	RYN52803.1	-	-	-	-	-	-	-	-	-	-
TRINITY_DN10656_c0_g2_i1	95.0997	7.72095	1.69421	3.37676	0.000733461	0.00462681	XP_014079926.1	-	-	-	-	-	-	-	-	-	-
TRINITY_DN10678_c0_g1_i2	734.03	13.2098	1.60675	6.97668	3.02242e-12	1.19951e-10	KAB2103525.1	-	-	-	-	-	-	-	-	-	-
TRINITY_DN10678_c0_g2_i1	70.1342	9.8226	2.16601	3.61152	0.000304405	0.00204034	RAQ99833.1	-	-	-	-	-	-	-	-	-	-
TRINITY_DN10681_c0_g2_i4	863.074	13.4435	1.56937	7.29177	3.05902e-13	1.71545e-11	OWY52485.1	-	-	-	-	-	-	-	-	-	-
TRINITY_DN10685_c0_g1_i1	124.191	7.57145	1.63739	3.40265	0.000667364	0.00423644	XP_010364047.2	-	-	-	-	-	-	-	-	-	-
TRINITY_DN10687_c0_g1_i2	232.138	11.5489	1.64438	5.80696	6.36158e-09	9.6111e-08	KAB2109289.1	-	-	-	-	-	-	-	-	-	-
TRINITY_DN10689_c0_g1_i2	1113.64	7.7524	0.635014	9.0587	1.32015e-19	3.52823e-17	-	-	-	-	-	-	-	-	-	-	-
TRINITY_DN10693_c0_g1_i1	562.618	12.8262	1.59304	6.79593	1.07615e-11	3.55854e-10	XP_018389593.1	-	-	-	-	-	-	-	-	-	-
TRINITY_DN106965_c0_g1_i1	231.001	11.5418	1.64816	5.78937	7.06502e-09	1.0563e-07	RYO45492.1	-	-	-	-	-	-	-	-	-	-
TRINITY_DN10698_c0_g1_i1	888.662	11.0195	1.19238	7.56428	3.90027e-14	2.94627e-12	XP_018385823.1	-	-	-	-	-	-	-	-	-	-
TRINITY_DN10698_c0_g2_i1	92.8784	10.2278	1.9556	4.20729	2.58449e-05	0.000203459	KNG45463.1	-	-	-	-	-	-	-	-	-	-
TRINITY_DN107041_c0_g1_i1	91.2029	5.37136	1.04745	3.21865	0.00128795	0.00776727	XP_001806656.1	-	-	-	-	-	-	-	-	-	-
TRINITY_DN10715_c0_g2_i1	1071.2	3.66412	0.606797	2.74246	0.00609814	0.0322892	XP_020276307.1	-	-	-	-	-	-	-	-	XP_015897327.1	Trihelix
TRINITY_DN107151_c0_g1_i13	175.039	11.1419	1.70347	5.36662	8.02242e-08	9.55069e-07	XP_028500869.1	-	-	-	-	-	-	-	-	Araip.EM5UC	TALE
TRINITY_DN107155_c0_g1_i1	96.9419	10.2892	1.75726	4.71713	2.392e-06	2.1982e-05	KAB2102560.1	-	-	-	-	-	-	-	-	-	-
TRINITY_DN10724_c0_g3_i1	96.9058	10.289	1.87184	4.42827	9.49937e-06	7.91808e-05	KNG52367.1	-	-	-	-	-	-	-	-	-	-
TRINITY_DN1073_c0_g2_i1	343.69	12.1152	1.62877	6.21034	5.28695e-10	1.05857e-08	OWY46068.1	-	-	-	-	-	-	-	-	-	-
TRINITY_DN10742_c0_g2_i1	220.929	11.4778	1.86598	5.07925	3.78927e-07	3.97243e-06	RAR01155.1	-	-	-	-	-	-	-	-	-	-
TRINITY_DN10753_c0_g1_i2	287.658	11.8584	1.61786	6.09349	1.10477e-09	2.01834e-08	XP_018387755.1	-	-	-	-	-	-	-	-	-	-
TRINITY_DN10757_c0_g1_i1	74.1811	7.57185	2.14922	2.5925	0.00952823	0.0485342	KNG49037.1	-	-	-	-	-	-	-	-	-	-
TRINITY_DN10763_c0_g1_i1	163.83	11.0462	1.67151	5.41198	6.23328e-08	7.56358e-07	RII04729.1	-	-	-	-	-	-	-	-	-	-
TRINITY_DN10772_c0_g1_i11	459.243	10.0499	1.28774	6.25117	4.07385e-10	8.44924e-09	RYN72378.1	-	-	-	-	-	-	-	-	-	-
TRINITY_DN10773_c0_g1_i9	1239.41	6.42279	0.916558	4.82544	1.39696e-06	1.33581e-05	-	-	-	-	-	-	-	-	-	-	-
TRINITY_DN10785_c0_g1_i6	27904.5	5.22668	0.687303	4.6947	2.67e-06	2.4325e-05	ABB70124.1	Homogentisate phytyltransferase VTE2-1	VTE2-1	Allium porrum (Leek) (Allium ampeloprasum var. porrum)	prenyltransferase activity [GO:0004659]	integral component of membrane [GO:0016021]	vitamin E biosynthetic process [GO:0010189]	PATHWAY: Cofactor biosynthesis; tocopherol biosynthesis. {ECO:0000256|ARBA:ARBA00024015}.	H	-	-
TRINITY_DN10786_c0_g1_i1	333.701	8.52921	1.2406	5.26294	1.41769e-07	1.60797e-06	KNG50020.1	-	-	-	-	-	-	-	-	-	-
TRINITY_DN10786_c1_g1_i1	986.626	11.1289	1.45549	6.2721	3.56208e-10	7.49457e-09	KAB2103431.1	-	-	-	-	-	-	-	-	-	-
TRINITY_DN10796_c0_g3_i1	114.927	10.5351	1.89023	4.51536	6.32095e-06	5.40751e-05	XP_007695470.1	-	-	-	-	-	-	-	-	-	-
TRINITY_DN10796_c2_g1_i2	297.355	11.9064	1.72739	5.73487	9.75844e-09	1.4141e-07	XP_028509833.1	-	-	-	-	-	-	-	-	-	-
TRINITY_DN10807_c0_g1_i2	464.717	12.5504	1.59372	6.61999	3.59219e-11	9.99259e-10	-	-	-	-	-	-	-	-	-	-	-
TRINITY_DN10815_c0_g1_i1	1965.89	4.18924	0.505438	4.33137	1.48183e-05	0.000120079	XP_010933216.1	probable folate-biopterin transporter 9, chloroplastic	LOC105053661	Elaeis guineensis var. tenera (Oil palm)	-	integral component of membrane [GO:0016021]	-	-	-	-	-
TRINITY_DN108153_c1_g1_i1	46.9251	6.69595	1.6726	2.80757	0.00499165	0.0268924	-	-	-	-	-	-	-	-	-	-	-
TRINITY_DN10816_c0_g1_i2	11514.7	3.71898	0.570107	3.01519	0.00256816	0.0146173	XP_020246936.1	-	-	-	-	-	-	-	-	PDK_30s873781g005	C3H
TRINITY_DN108200_c0_g1_i1	108.115	10.4468	2.32306	3.63606	0.000276835	0.00187158	KNG47301.1	-	-	-	-	-	-	-	-	-	-
TRINITY_DN10823_c0_g1_i1	873.345	13.4605	1.737	6.59784	4.17182e-11	1.13874e-09	-	-	-	-	-	-	-	-	-	-	-
TRINITY_DN10826_c0_g1_i2	48.0492	9.27704	2.41204	3.01697	0.00255314	0.0145416	KNG46605.1	-	-	-	-	-	-	-	-	-	-
TRINITY_DN10826_c0_g2_i2	415.228	12.388	1.61729	6.42308	1.3354e-10	3.12756e-09	RII07825.1	-	-	-	-	-	-	-	-	-	-
TRINITY_DN10865_c0_g1_i1	504.402	12.6686	1.58996	6.70999	1.94641e-11	5.96453e-10	XP_028511877.1	-	-	-	-	-	-	-	-	-	-
TRINITY_DN10868_c0_g1_i1	462.793	12.5444	1.59728	6.6015	4.07018e-11	1.11388e-09	KNG51663.1	-	-	-	-	-	-	-	-	-	-
TRINITY_DN108755_c0_g1_i1	279.943	11.8192	1.63134	6.01911	1.75376e-09	3.05385e-08	RYO42683.1	-	-	-	-	-	-	-	-	-	-
TRINITY_DN10877_c0_g1_i1	85.9076	10.115	1.78824	4.53797	5.67993e-06	4.90684e-05	-	-	-	-	-	-	-	-	-	-	-
TRINITY_DN10878_c1_g1_i2	98.6988	10.3154	2.15115	3.86558	0.000110828	0.00079699	KNG51689.1	-	-	-	-	-	-	-	-	-	-
TRINITY_DN10878_c1_g2_i1	519.115	12.7102	1.68931	6.33998	2.29797e-10	5.04946e-09	XP_018390488.1	-	-	-	-	-	-	-	-	-	-
TRINITY_DN10881_c0_g1_i2	149.394	10.9134	1.73553	5.13581	2.80924e-07	3.01234e-06	XP_018387341.1	-	-	-	-	-	-	-	-	-	-
TRINITY_DN10881_c0_g2_i1	31.5637	8.67094	2.46122	2.71042	0.00671976	0.0352535	KNG48681.1	-	-	-	-	-	-	-	-	-	-
TRINITY_DN10893_c5_g1_i1	763.885	10.7869	1.27336	6.90055	5.18004e-12	1.90041e-10	XP_028506672.1	-	-	-	-	-	-	-	-	-	-
TRINITY_DN10898_c0_g1_i1	702.943	13.1475	1.5926	6.99953	2.56831e-12	1.04081e-10	XP_018391353.1	-	-	-	-	-	-	-	-	-	-
TRINITY_DN10902_c0_g1_i1	276.622	11.8021	1.88155	5.20957	1.89278e-07	2.09122e-06	XP_008023853.1	-	-	-	-	-	-	-	-	-	-
TRINITY_DN10910_c1_g1_i1	8872.02	4.51527	0.83536	3.011	0.00260388	0.0148007	XP_020254563.1	-	-	-	-	-	-	-	K	XP_010922870.1	NAC
TRINITY_DN10911_c0_g2_i1	833.404	13.3929	1.64497	6.92591	4.33182e-12	1.62595e-10	RII06089.1	-	-	-	-	-	-	-	-	-	-
TRINITY_DN10915_c0_g2_i1	68.9243	9.79661	2.13335	3.65463	0.000257549	0.00174932	-	-	-	-	-	-	-	-	-	-	-
TRINITY_DN1092_c1_g1_i1	546.377	10.2942	1.32881	6.2418	4.32557e-10	8.91874e-09	RII08978.1	-	-	-	-	-	-	-	-	-	-
TRINITY_DN1092_c1_g2_i1	74.6792	9.91308	2.39968	3.29756	0.000975294	0.00602014	RAR08401.1	-	-	-	-	-	-	-	-	-	-
TRINITY_DN109217_c0_g1_i2	53.7905	9.43979	2.51444	2.95883	0.00308813	0.0173039	KNG47642.1	-	-	-	-	-	-	-	-	-	-
TRINITY_DN109217_c0_g3_i5	319.436	12.0095	1.61017	6.21647	5.08477e-10	1.02148e-08	RII10949.1	-	-	-	-	-	-	-	-	-	-
TRINITY_DN10924_c0_g2_i1	214.222	11.4331	1.64161	5.74626	9.12406e-09	1.32764e-07	XP_018383984.1	-	-	-	-	-	-	-	-	-	-
TRINITY_DN10948_c0_g1_i1	514.5	12.6972	1.58508	6.74864	1.49236e-11	4.71692e-10	RII19251.1	-	-	-	-	-	-	-	-	-	-
TRINITY_DN1095_c0_g2_i1	1022.55	13.6881	1.6046	7.28416	3.23671e-13	1.80312e-11	KNG45212.1	-	-	-	-	-	-	-	-	-	-
TRINITY_DN10950_c0_g1_i1	155.504	10.9708	1.70496	5.26156	1.42836e-07	1.61964e-06	KNG44267.1	-	-	-	-	-	-	-	-	-	-
TRINITY_DN10957_c0_g1_i2	889.411	13.4869	1.58697	7.23826	4.5447e-13	2.41395e-11	XP_028501277.1	-	-	-	-	-	-	-	-	Sopen12g015990.1	TCP
TRINITY_DN10964_c0_g1_i1	732.956	13.2076	1.6105	6.95912	3.42405e-12	1.33506e-10	RYN19264.1	-	-	-	-	-	-	-	-	-	-
TRINITY_DN10964_c0_g2_i2	43.0692	9.11925	2.17443	3.27407	0.0010601	0.006498	KNG52843.1	-	-	-	-	-	-	-	-	-	-
TRINITY_DN10974_c0_g1_i2	510.664	12.6865	1.61856	6.60245	4.04427e-11	1.10894e-09	-	-	-	-	-	-	-	-	-	-	-
TRINITY_DN10975_c0_g1_i1	837.959	13.4008	1.58852	7.17701	7.12503e-13	3.54798e-11	XP_018382081.1	-	-	-	-	-	-	-	-	-	-
TRINITY_DN10975_c0_g2_i1	79.6656	10.0064	1.97228	4.05948	4.91831e-05	0.000372931	KNG50520.1	-	-	-	-	-	-	-	-	-	-
TRINITY_DN10975_c1_g2_i1	138.04	10.7992	1.71192	5.13997	2.74782e-07	2.95322e-06	RYN82868.1	-	-	-	-	-	-	-	-	-	-
TRINITY_DN10975_c1_g5_i2	555.443	9.29428	1.05205	6.9334	4.10839e-12	1.55452e-10	KAB2105717.1	-	-	-	-	-	-	-	-	-	-
TRINITY_DN10975_c2_g1_i1	75.6347	9.9312	1.81696	4.36509	1.2707e-05	0.000103928	RYO45230.1	-	-	-	-	-	-	-	-	-	-
TRINITY_DN10976_c0_g1_i4	1162.46	4.9366	0.678995	4.32491	1.52592e-05	0.000123439	XP_020275381.1	-	-	-	-	-	-	-	-	Bradi2g44117.7.p	bHLH
TRINITY_DN1098_c0_g1_i3	6783.53	12.2875	1.05195	9.77943	1.37986e-22	5.60263e-20	XP_018391316.1	-	-	-	-	-	-	-	-	-	-
TRINITY_DN1098_c0_g2_i1	671.242	13.0809	1.81216	6.11476	9.6701e-10	1.79411e-08	KNG46744.1	-	-	-	-	-	-	-	-	-	-
TRINITY_DN10989_c0_g1_i2	756.538	13.2534	1.58075	7.11899	1.08719e-12	5.08403e-11	RYN16878.1	-	-	-	-	-	-	-	-	-	-
TRINITY_DN10991_c0_g1_i1	448.337	12.4987	1.60804	6.52887	6.62656e-11	1.69691e-09	OWY46072.1	-	-	-	-	-	-	-	-	-	-
TRINITY_DN10991_c0_g2_i1	692.969	9.61708	1.03458	7.36252	1.80473e-13	1.09138e-11	RYN50922.1	-	-	-	-	-	-	-	-	-	-
TRINITY_DN1100_c0_g1_i1	3989.62	15.6522	1.55033	8.80599	1.29703e-18	2.86752e-16	-	-	-	-	-	-	-	-	-	-	-
TRINITY_DN11014_c0_g1_i3	497.348	10.1688	1.26345	6.46547	1.00987e-10	2.44377e-09	RII12807.1	-	-	-	-	-	-	-	-	-	-
TRINITY_DN11018_c0_g1_i4	178.117	11.1667	1.67715	5.46563	4.61264e-08	5.75755e-07	RYN53151.1	-	-	-	-	-	-	-	-	-	-
TRINITY_DN11020_c0_g1_i1	118.227	4.89364	0.854549	3.38617	0.000708767	0.00447839	-	-	-	-	-	-	-	-	-	-	-
TRINITY_DN11024_c0_g1_i1	2666.85	3.45974	0.48303	3.02205	0.00251073	0.014329	XP_020275678.1	-	-	-	-	-	-	-	-	-	-
TRINITY_DN11025_c0_g1_i6	983.057	13.6313	1.5696	7.41036	1.25959e-13	8.10802e-12	KNG46568.1	-	-	-	-	-	-	-	-	Achn219111	NAC
TRINITY_DN11033_c0_g1_i1	360.97	12.1859	1.60694	6.33871	2.31695e-10	5.08512e-09	RYN76749.1	-	-	-	-	-	-	-	-	-	-
TRINITY_DN11056_c1_g1_i2	27852.4	9.83952	0.51833	15.1246	1.11488e-51	1.56927e-47	XP_020243896.1	-	-	-	-	-	-	-	S	-	-
TRINITY_DN11057_c0_g1_i1	70.3386	9.82676	2.28525	3.4249	0.000615015	0.00392596	RYO54573.1	-	-	-	-	-	-	-	-	-	-
TRINITY_DN11059_c0_g1_i3	624.634	12.9769	1.61489	6.79734	1.06572e-11	3.53235e-10	RII14367.1	-	-	-	-	-	-	-	-	-	-
TRINITY_DN11060_c0_g1_i1	165.185	11.0583	1.93119	4.69055	2.72467e-06	2.47856e-05	-	-	-	-	-	-	-	-	-	-	-
TRINITY_DN11070_c0_g2_i3	149.546	10.9148	2.03103	4.38932	1.13705e-05	9.36132e-05	RAR09993.1	-	-	-	-	-	-	-	-	-	-
TRINITY_DN110715_c1_g1_i3	458.791	12.5318	1.60879	6.54639	5.89447e-11	1.53267e-09	RII16618.1	-	-	-	-	-	-	-	-	-	-
TRINITY_DN11079_c0_g1_i4	248.936	11.6499	1.65029	5.84741	4.99276e-09	7.70857e-08	XP_028507600.1	-	-	-	-	-	-	-	-	-	-
TRINITY_DN110856_c0_g1_i1	396.851	10.8942	1.57917	5.63222	1.77904e-08	2.4367e-07	AIZ66409.1	-	-	-	-	-	-	-	-	-	-
TRINITY_DN11089_c0_g1_i1	1026.39	12.2482	1.51453	6.76657	1.31871e-11	4.21857e-10	OWY48116.1	-	-	-	-	-	-	-	-	-	-
TRINITY_DN1109_c0_g2_i6	10363.4	5.11839	0.595784	5.2341	1.65793e-07	1.85112e-06	XP_020256658.1	-	-	-	-	-	-	-	-	GSBRNA2T00126537001	S1Fa-like
TRINITY_DN1109_c0_g4_i2	10514.7	5.09827	0.571268	5.42349	5.8447e-08	7.13719e-07	XP_020256658.1	-	-	-	-	-	-	-	-	GSBRNA2T00126537001	S1Fa-like
TRINITY_DN11091_c0_g1_i1	32.5491	8.71481	2.13759	3.1413	0.00168198	0.00991831	KNG50438.1	-	-	-	-	-	-	-	-	-	-
TRINITY_DN11091_c0_g2_i1	40.9995	9.04819	2.16691	3.25265	0.00114336	0.00695986	KNG50438.1	-	-	-	-	-	-	-	-	-	-
TRINITY_DN11092_c0_g1_i1	698.302	13.1379	1.59103	7.00045	2.55137e-12	1.03494e-10	RYN61692.1	-	-	-	-	-	-	-	-	-	-
TRINITY_DN1110_c0_g1_i1	244.763	7.04088	1.07807	4.67582	2.92778e-06	2.65247e-05	-	-	-	-	-	-	-	-	-	-	-
TRINITY_DN11101_c2_g1_i2	44.5983	6.62292	1.66429	2.77771	0.0054743	0.0292556	-	-	-	-	-	-	-	-	-	-	-
TRINITY_DN11103_c0_g1_i1	27346	8.45316	1.04469	6.17708	6.52967e-10	1.26655e-08	XP_020270199.1	-	-	-	-	-	-	-	S	-	-
TRINITY_DN11117_c0_g1_i5	2469.82	3.85314	0.603719	3.06953	0.00214394	0.0124085	XP_017698761.1	-	-	-	-	-	-	-	U	Itr_sc000489.1_g00018.1	ERF
TRINITY_DN111226_c0_g1_i1	44.3118	9.16025	2.42666	2.95067	0.0031709	0.0177418	KNG46275.1	-	-	-	-	-	-	-	-	-	-
TRINITY_DN11124_c0_g1_i1	96.5928	10.2843	2.08373	3.97573	7.01643e-05	0.000518521	XP_009348147.1	-	-	-	-	-	-	-	-	-	-
TRINITY_DN11124_c2_g1_i1	111.612	10.4928	1.81608	4.67643	2.91914e-06	2.64577e-05	RYN23257.1	-	-	-	-	-	-	-	-	-	-
TRINITY_DN11127_c0_g1_i1	481.72	12.6021	1.59577	6.64389	3.05516e-11	8.68172e-10	OWY55556.1	-	-	-	-	-	-	-	-	-	-
TRINITY_DN11130_c0_g1_i2	933.374	13.5565	1.62715	7.1023	1.22695e-12	5.61738e-11	RYO52047.1	-	-	-	-	-	-	-	-	-	-
TRINITY_DN11131_c0_g2_i1	721.956	13.186	1.60776	6.95749	3.46379e-12	1.34684e-10	-	-	-	-	-	-	-	-	-	-	-
TRINITY_DN11131_c0_g3_i1	85.7826	10.1131	2.11422	3.83741	0.000124341	0.000887214	KNG51296.1	-	-	-	-	-	-	-	-	-	-
TRINITY_DN11131_c0_g6_i1	67.4448	9.76612	1.91024	4.06553	4.79232e-05	0.000363836	-	-	-	-	-	-	-	-	-	-	-
TRINITY_DN11137_c0_g1_i9	26356.4	3.95353	0.70262	2.78034	0.00543013	0.0290324	ANH58213.1	Glutathione S-transferase	GSTL1	Dracaena cambodiana	glutathione transferase activity [GO:0004364]	-	glutathione metabolic process [GO:0006749]	-	T	-	-
TRINITY_DN11143_c0_g1_i1	109.634	8.10585	1.66253	3.67263	0.000240063	0.00163899	-	-	-	-	-	-	-	-	-	-	-
TRINITY_DN11148_c0_g1_i1	82.5066	10.057	2.02576	3.97725	6.97159e-05	0.000515625	KNG49721.1	-	-	-	-	-	-	-	-	-	-
TRINITY_DN11149_c1_g1_i2	115.74	5.98514	1.27828	3.11758	0.0018234	0.0106955	-	-	-	-	-	-	-	-	-	-	-
TRINITY_DN11151_c0_g1_i1	111	5.24475	0.990102	3.27719	0.00104846	0.00643414	XP_020251051.1	-	-	-	-	-	-	-	-	-	-
TRINITY_DN111519_c0_g1_i2	534.435	9.23656	1.06303	6.80747	9.93305e-12	3.33686e-10	RII04907.1	-	-	-	-	-	-	-	-	-	-
TRINITY_DN11152_c0_g1_i1	592.597	12.9011	1.62471	6.70958	1.95192e-11	5.97273e-10	XP_018387876.1	-	-	-	-	-	-	-	-	-	-
TRINITY_DN11153_c0_g1_i10	38072.8	6.38669	0.912713	4.80621	1.5382e-06	1.45996e-05	RWR95518.1	Chitinase 2-like protein	CKAN_02486700	Cinnamomum micranthum f. kanehirae	hydrolase activity, hydrolyzing O-glycosyl compounds [GO:0004553]	-	carbohydrate metabolic process [GO:0005975]	-	G	-	-
TRINITY_DN11155_c0_g1_i2	580.391	12.8709	1.74384	6.23389	4.55005e-10	9.31338e-09	-	-	-	-	-	-	-	-	-	-	-
TRINITY_DN11160_c0_g1_i1	572.236	26.1134	4.78485	5.03952	4.66698e-07	4.81487e-06	-	-	-	-	-	-	-	-	-	-	-
TRINITY_DN11162_c0_g1_i2	64.7286	7.32866	1.51547	3.51618	0.000437807	0.00286225	RYN92753.1	-	-	-	-	-	-	-	-	-	-
TRINITY_DN11162_c0_g2_i1	64.0962	9.69239	1.86323	4.12852	3.6511e-05	0.00028201	RII10270.1	-	-	-	-	-	-	-	-	-	-
TRINITY_DN11166_c0_g1_i6	188.986	11.2525	1.70816	5.41665	6.07252e-08	7.38337e-07	XP_028503099.1	-	-	-	-	-	-	-	-	-	-
TRINITY_DN111721_c0_g1_i1	37.9311	8.93599	2.21588	3.13012	0.00174733	0.0102792	CDR35516.1	-	-	-	-	-	-	-	-	-	-
TRINITY_DN11176_c0_g1_i2	144.53	10.8656	1.93107	4.59106	4.4099e-06	3.87548e-05	KNG48239.1	-	-	-	-	-	-	-	-	-	-
TRINITY_DN11184_c0_g1_i2	373.398	12.2348	1.6176	6.32717	2.49701e-10	5.44896e-09	RYN29275.1	-	-	-	-	-	-	-	-	-	-
TRINITY_DN11185_c0_g1_i2	108.316	7.90726	1.71793	3.43858	0.000584773	0.00374537	RYO67540.1	-	-	-	-	-	-	-	-	-	-
TRINITY_DN112036_c0_g1_i1	147.528	10.8948	1.73004	5.14135	2.72772e-07	2.93237e-06	OWY47803.1	-	-	-	-	-	-	-	-	-	-
TRINITY_DN112041_c0_g1_i1	197.532	8.82993	1.29258	5.28396	1.26418e-07	1.45141e-06	RYN97584.1	-	-	-	-	-	-	-	-	-	-
TRINITY_DN11205_c0_g1_i1	672.542	13.0836	1.57872	7.02066	2.20827e-12	9.22341e-11	XP_028503799.1	-	-	-	-	-	-	-	-	-	-
TRINITY_DN11205_c0_g2_i1	78.4759	9.98471	2.14174	3.72814	0.000192902	0.00133667	RAR03018.1	-	-	-	-	-	-	-	-	-	-
TRINITY_DN11210_c0_g1_i5	2308.2	12.3208	1.77929	5.80053	6.61074e-09	9.94838e-08	-	-	-	-	-	-	-	-	-	-	-
TRINITY_DN11211_c0_g1_i1	1513.06	4.09937	0.661986	3.17133	0.00151745	0.00902116	THU65127.1	CASP-like protein	C4D60_Mb05t00370	Musa balbisiana (Banana)	-	integral component of membrane [GO:0016021]; plasma membrane [GO:0005886]	-	-	-	-	-
TRINITY_DN112126_c0_g1_i1	123.308	10.6365	1.75396	4.92399	8.47975e-07	8.38385e-06	OWY45526.1	-	-	-	-	-	-	-	-	-	-
TRINITY_DN11218_c0_g1_i1	1699.74	3.83254	0.662908	2.7644	0.0057028	0.0303557	XP_029117226.1	-	-	-	-	-	-	-	-	-	-
TRINITY_DN11220_c0_g1_i1	127.656	10.6865	2.02528	4.28905	1.79441e-05	0.00014403	RAR11185.1	-	-	-	-	-	-	-	-	-	-
TRINITY_DN11223_c0_g1_i3	92.6015	10.2235	1.87366	4.38897	1.13888e-05	9.37275e-05	RYN18662.1	-	-	-	-	-	-	-	-	-	-
TRINITY_DN11224_c0_g1_i1	781.059	6.50613	1.4787	3.04737	0.00230856	0.0132811	XP_014073547.1	-	-	-	-	-	-	-	-	-	-
TRINITY_DN112245_c0_g1_i2	305.492	11.945	1.62434	6.12251	9.21112e-10	1.71801e-08	RYN46395.1	-	-	-	-	-	-	-	-	-	-
TRINITY_DN112245_c0_g3_i1	168.882	9.63642	1.60742	4.75073	2.02682e-06	1.88559e-05	XP_018385884.1	-	-	-	-	-	-	-	-	-	-
TRINITY_DN112270_c0_g1_i1	310.043	11.9666	1.64088	6.07393	1.24817e-09	2.25242e-08	XP_018379401.1	-	-	-	-	-	-	-	-	-	-
TRINITY_DN11228_c0_g1_i5	188.202	11.2462	1.65657	5.58157	2.38359e-08	3.17414e-07	OWY43002.1	-	-	-	-	-	-	-	-	-	-
TRINITY_DN11244_c0_g1_i4	937.009	13.5621	1.62684	7.1071	1.18508e-12	5.47509e-11	XP_018379085.1	-	-	-	-	-	-	-	-	-	-
TRINITY_DN112526_c0_g1_i1	219.97	11.4714	1.64362	5.7625	8.28754e-09	1.21763e-07	RII18173.1	-	-	-	-	-	-	-	-	-	-
TRINITY_DN11258_c0_g1_i1	49.7892	6.77071	1.80787	2.63886	0.00831843	0.0428682	RAR09669.1	-	-	-	-	-	-	-	-	-	-
TRINITY_DN112706_c0_g1_i1	203.299	11.3574	1.80667	5.17934	2.22667e-07	2.42522e-06	XP_018388662.1	-	-	-	-	-	-	-	-	-	-
TRINITY_DN11273_c0_g2_i9	635.583	13.002	1.58156	6.95643	3.49e-12	1.35328e-10	-	-	-	-	-	-	-	-	-	-	-
TRINITY_DN11275_c0_g1_i3	69.412	7.26188	1.70777	3.08113	0.00206215	0.0119695	-	-	-	-	-	-	-	-	-	-	-
TRINITY_DN11284_c0_g3_i1	891.773	13.4907	1.56785	7.32895	2.31964e-13	1.35479e-11	RII19895.1	-	-	-	-	-	-	-	-	-	-
TRINITY_DN11287_c0_g2_i1	589.926	8.96212	1.0462	6.65469	2.83903e-11	8.10024e-10	OWY46152.1	-	-	-	-	-	-	-	-	-	-
TRINITY_DN112871_c0_g1_i5	72.4378	9.86899	1.83915	4.27861	1.88063e-05	0.000150603	XP_018385682.1	-	-	-	-	-	-	-	-	-	-
TRINITY_DN112944_c0_g1_i1	146.787	10.8879	1.72303	5.15832	2.49175e-07	2.69379e-06	RYN32826.1	-	-	-	-	-	-	-	-	-	-
TRINITY_DN11295_c0_g1_i20	8606.92	5.3659	0.475793	7.07428	1.50226e-12	6.65644e-11	XP_020241774.1	-	-	-	-	-	-	-	-	-	-
TRINITY_DN11299_c0_g1_i1	309.15	11.9624	1.61915	6.15283	7.61111e-10	1.44707e-08	OWY43657.1	-	-	-	-	-	-	-	-	-	-
TRINITY_DN113036_c0_g2_i1	136.069	10.7785	1.70832	5.13866	2.76707e-07	2.97315e-06	RYN98079.1	-	-	-	-	-	-	-	-	-	-
TRINITY_DN11309_c0_g1_i1	4951.34	6.78081	0.787789	6.06864	1.28996e-09	2.31497e-08	-	-	-	-	-	-	-	-	-	-	-
TRINITY_DN11314_c0_g1_i3	811.257	5.2748	0.853452	3.83713	0.000124482	0.000888072	XP_020254829.1	-	-	-	-	-	-	-	-	676782350	GATA
TRINITY_DN11317_c0_g1_i1	1375.6	8.15756	0.999974	6.15772	7.37992e-10	1.41074e-08	XP_008784878.1	-	-	-	-	-	-	-	-	-	-
TRINITY_DN113187_c0_g2_i1	1497.89	4.86054	0.616557	4.63954	3.49178e-06	3.12455e-05	XP_018681641.1	-	-	-	-	-	-	-	-	-	-
TRINITY_DN11320_c0_g1_i14	848.345	13.4186	1.57526	7.24869	4.20809e-13	2.26075e-11	RII09820.1	-	-	-	-	-	-	-	-	-	-
TRINITY_DN11328_c0_g1_i1	3140.29	4.03986	0.589113	3.4626	0.000534976	0.00344419	XP_020275856.1	-	-	-	-	-	-	-	-	-	-
TRINITY_DN1133_c0_g2_i1	1402.9	3.50804	0.539883	2.79326	0.00521796	0.0279973	XP_008785103.1	-	-	-	-	-	-	-	-	-	-
TRINITY_DN113306_c0_g1_i1	273.889	11.7877	1.64883	5.93615	2.91797e-09	4.79631e-08	KAB2104945.1	-	-	-	-	-	-	-	-	-	-
TRINITY_DN11338_c0_g1_i1	158.547	10.9992	1.94986	4.61529	3.92542e-06	3.48119e-05	KNG46104.1	-	-	-	-	-	-	-	-	-	-
TRINITY_DN11356_c0_g1_i1	63.6613	9.68292	2.19309	3.50323	0.000459645	0.00299574	KNG49504.1	-	-	-	-	-	-	-	-	-	-
TRINITY_DN1136_c0_g1_i1	291.138	11.8756	1.64212	6.01392	1.81089e-09	3.13715e-08	XP_020268379.1	-	-	-	-	-	-	-	K	PDK_30s1133891g002	HD-ZIP
TRINITY_DN11361_c0_g3_i1	128.96	8.34661	1.73584	3.65622	0.000255962	0.00173966	XP_008020165.1	-	-	-	-	-	-	-	-	-	-
TRINITY_DN113643_c0_g1_i1	39.4307	8.99189	2.1668	3.22683	0.0012517	0.00756593	XP_007699136.1	-	-	-	-	-	-	-	-	-	-
TRINITY_DN113694_c0_g1_i2	64.9696	9.71206	1.87938	4.10352	4.06919e-05	0.000312759	XP_018391684.1	-	-	-	-	-	-	-	-	-	-
TRINITY_DN113725_c0_g1_i1	297.592	11.9074	1.63243	6.06913	1.28608e-09	2.30953e-08	RYN31711.1	-	-	-	-	-	-	-	-	-	-
TRINITY_DN113872_c0_g1_i1	277.656	11.8075	1.69638	5.7814	7.40818e-09	1.10227e-07	RAQ99826.1	-	-	-	-	-	-	-	-	-	-
TRINITY_DN11397_c0_g2_i1	45.2312	9.1898	2.05675	3.49571	0.000472802	0.00307296	RAR16007.1	-	-	-	-	-	-	-	-	-	-
TRINITY_DN11397_c0_g3_i2	477.188	12.5885	1.61192	6.56887	5.06978e-11	1.35409e-09	XP_018388482.1	-	-	-	-	-	-	-	-	-	-
TRINITY_DN114050_c0_g1_i5	271.875	9.37981	1.27529	5.78675	7.17609e-09	1.07114e-07	KAB2110932.1	-	-	-	-	-	-	-	-	-	-
TRINITY_DN114094_c0_g2_i1	154.434	10.9613	1.8876	4.74744	2.06006e-06	1.91524e-05	KNG44847.1	-	-	-	-	-	-	-	-	-	-
TRINITY_DN114095_c1_g1_i1	289.475	11.8676	1.65754	5.95316	2.63008e-09	4.3759e-08	RMZ70531.1	-	-	-	-	-	-	-	-	-	-
TRINITY_DN11410_c0_g2_i1	22.843	8.20384	2.34029	2.65089	0.00802809	0.0414935	-	-	-	-	-	-	-	-	-	-	-
TRINITY_DN114129_c0_g1_i1	64.0993	7.34841	1.94357	2.75185	0.00592588	0.0314599	KNG49679.1	-	-	-	-	-	-	-	-	-	-
TRINITY_DN11413_c0_g1_i1	41.2565	9.05694	2.04218	3.45559	0.000549099	0.00352965	KAB2104533.1	-	-	-	-	-	-	-	-	-	-
TRINITY_DN11413_c0_g2_i11	493.21	12.6363	1.66984	6.36964	1.89469e-10	4.24665e-09	KAB2101077.1	-	-	-	-	-	-	-	-	-	-
TRINITY_DN11413_c0_g5_i1	86.5108	10.1251	1.79257	4.53265	5.82495e-06	5.01366e-05	XP_018384785.1	-	-	-	-	-	-	-	-	-	-
TRINITY_DN11415_c0_g2_i1	425.438	12.4229	1.59332	6.54165	6.08425e-11	1.57234e-09	KAB2102781.1	-	-	-	-	-	-	-	-	-	-
TRINITY_DN11415_c0_g3_i1	44.9742	9.1817	2.23499	3.2133	0.0013122	0.00789881	RAR04659.1	-	-	-	-	-	-	-	-	-	-
TRINITY_DN11415_c0_g4_i1	38.5672	8.96	2.26277	3.07588	0.00209882	0.0121607	XP_008022750.1	-	-	-	-	-	-	-	-	-	-
TRINITY_DN11419_c1_g1_i1	827.025	5.65043	0.891947	4.09265	4.26471e-05	0.000326538	-	-	-	-	-	-	-	-	-	-	-
TRINITY_DN114262_c0_g2_i5	370.686	12.2243	1.72974	5.91091	3.40217e-09	5.48333e-08	XP_018387451.1	-	-	-	-	-	-	-	-	-	-
TRINITY_DN114277_c0_g1_i1	36.102	8.86472	2.42649	2.82907	0.0046684	0.0252896	XP_014554016.1	-	-	-	-	-	-	-	-	-	-
TRINITY_DN114277_c1_g1_i1	125.45	10.6611	1.70922	5.0673	4.03506e-07	4.2092e-06	RII04909.1	-	-	-	-	-	-	-	-	-	-
TRINITY_DN11434_c0_g1_i2	488.511	11.1366	2.09591	4.35925	1.30508e-05	0.000106554	KDN70926.1	-	-	-	-	-	-	-	-	-	-
TRINITY_DN114385_c0_g1_i2	267.248	8.21624	1.17755	5.27895	1.29924e-07	1.4856e-06	XP_018385844.1	-	-	-	-	-	-	-	-	-	-
TRINITY_DN11449_c0_g1_i1	944.945	11.1863	1.34298	6.84022	7.90695e-12	2.75257e-10	XP_020245433.1	-	-	-	-	-	-	-	-	-	-
TRINITY_DN11449_c1_g1_i1	425.457	12.4229	1.70885	6.09934	1.06506e-09	1.9537e-08	-	-	-	-	-	-	-	-	-	-	-
TRINITY_DN11449_c2_g1_i1	188.465	7.69933	1.25829	4.52942	5.91471e-06	5.0847e-05	-	-	-	-	-	-	-	-	-	-	-
TRINITY_DN11460_c0_g1_i1	550.068	12.7936	1.58276	6.81949	9.13672e-12	3.10891e-10	XP_028506718.1	-	-	-	-	-	-	-	-	Lus10009218	C2H2
TRINITY_DN11460_c0_g2_i1	89.3553	10.172	2.15402	3.79382	0.000148346	0.00104648	RAR04119.1	-	-	-	-	-	-	-	-	Lus10009218	C2H2
TRINITY_DN114605_c0_g1_i2	88.2742	10.1544	1.96337	4.15329	3.27734e-05	0.000254913	RAR12758.1	-	-	-	-	-	-	-	-	-	-
TRINITY_DN11476_c0_g1_i1	101.375	10.3539	2.37192	3.52201	0.00042829	0.00280437	KNG50706.1	-	-	-	-	-	-	-	-	-	-
TRINITY_DN11477_c0_g2_i2	2178.26	6.28445	0.97772	4.38208	1.17552e-05	9.65173e-05	-	-	-	-	-	-	-	-	-	-	-
TRINITY_DN11482_c0_g1_i1	2173.15	14.7757	1.55384	8.22203	2.00088e-16	2.78222e-14	-	-	-	-	-	-	-	-	-	-	-
TRINITY_DN11488_c0_g1_i21	24708.4	12.1123	1.08932	9.28315	1.6454e-20	4.99858e-18	ATY69730.1	-	-	-	-	-	-	-	-	-	-
TRINITY_DN11491_c0_g1_i1	122.394	6.21981	1.03022	4.09604	4.20282e-05	0.000322033	RAR08291.1	-	-	-	-	-	-	-	-	-	-
TRINITY_DN11491_c0_g2_i2	2847.09	11.6679	0.979427	9.87094	5.56394e-23	2.47314e-20	OWY54350.1	-	-	-	-	-	-	-	-	-	-
TRINITY_DN11491_c0_g3_i1	74.0035	9.90007	2.12787	3.71267	0.000205085	0.00141575	XP_014084515.1	-	-	-	-	-	-	-	-	-	-
TRINITY_DN11499_c0_g3_i2	221.571	11.4817	1.64546	5.76231	8.2968e-09	1.21818e-07	-	-	-	-	-	-	-	-	-	-	-
TRINITY_DN1150_c0_g1_i3	48.1247	6.73322	1.66752	2.83847	0.004533	0.0246225	XP_023633895.1	-	-	-	-	-	-	-	S	-	-
TRINITY_DN11506_c0_g1_i1	578.174	12.8654	1.60789	6.75755	1.40348e-11	4.47282e-10	RYO68668.1	-	-	-	-	-	-	-	-	-	-
TRINITY_DN115064_c0_g1_i1	105.913	10.4172	1.85848	4.52909	5.92372e-06	5.09107e-05	RYO24094.1	-	-	-	-	-	-	-	-	-	-
TRINITY_DN11507_c0_g1_i1	57.6759	9.53968	1.9487	3.86909	0.000109244	0.00078654	-	-	-	-	-	-	-	-	-	-	-
TRINITY_DN11508_c0_g1_i1	157.979	10.9936	1.689	5.32482	1.01055e-07	1.18076e-06	-	-	-	-	-	-	-	-	-	-	-
TRINITY_DN11512_c0_g1_i2	173.005	11.125	1.70728	5.34476	9.05365e-08	1.0682e-06	XP_018382164.1	-	-	-	-	-	-	-	-	-	-
TRINITY_DN11516_c1_g2_i1	100.307	10.3388	1.85651	4.49164	7.06766e-06	6.00133e-05	OWY44563.1	-	-	-	-	-	-	-	-	-	-
TRINITY_DN11517_c0_g1_i1	735.42	13.2125	1.94878	5.75358	8.73723e-09	1.27752e-07	-	-	-	-	-	-	-	-	-	-	-
TRINITY_DN115185_c1_g1_i2	94.7931	10.2571	1.81237	4.55599	5.21398e-06	4.53399e-05	XP_018385736.1	-	-	-	-	-	-	-	-	-	-
TRINITY_DN11523_c0_g1_i1	68.1205	9.78058	1.98554	3.91863	8.90531e-05	0.000649136	KNG52160.1	-	-	-	-	-	-	-	-	-	-
TRINITY_DN11525_c0_g1_i1	1182.6	13.8979	1.56191	7.61752	2.58591e-14	2.0467e-12	RYN28609.1	-	-	-	-	-	-	-	-	-	-
TRINITY_DN1154_c0_g2_i7	101.698	10.3586	2.07697	4.02443	5.7113e-05	0.000427684	RAR09023.1	-	-	-	-	-	-	-	-	-	-
TRINITY_DN1154_c0_g3_i1	1568.47	14.3053	1.56471	7.86424	3.71335e-15	3.78752e-13	OWY46118.1	-	-	-	-	-	-	-	-	-	-
TRINITY_DN1154_c1_g1_i1	463.88	12.5477	1.58953	6.63577	3.22811e-11	9.11187e-10	RYN32469.1	-	-	-	-	-	-	-	-	-	-
TRINITY_DN11551_c0_g2_i1	154.012	10.9573	1.97541	4.5344	5.77685e-06	4.9814e-05	KNG50157.1	-	-	-	-	-	-	-	-	-	-
TRINITY_DN11555_c0_g1_i1	778.68	6.49163	0.672984	6.67421	2.48574e-11	7.28422e-10	-	-	-	-	-	-	-	-	-	Tp57577_TGAC_v2_mRNA33215	bHLH
TRINITY_DN11561_c0_g1_i5	503.465	12.6658	1.592	6.69965	2.08912e-11	6.31478e-10	XP_018388724.1	-	-	-	-	-	-	-	-	-	-
TRINITY_DN1157_c0_g1_i1	3528.48	15.475	1.78483	7.54973	4.36168e-14	3.25407e-12	-	-	-	-	-	-	-	-	-	-	-
TRINITY_DN1157_c0_g2_i1	595.518	10.3765	1.66173	5.0408	4.63601e-07	4.78525e-06	-	-	-	-	-	-	-	-	-	-	-
TRINITY_DN11571_c0_g1_i2	256.342	11.6922	1.64972	5.87504	4.22732e-09	6.63348e-08	KAB2108566.1	-	-	-	-	-	-	-	-	-	-
TRINITY_DN11576_c0_g1_i1	1453.19	14.1952	1.58658	7.68647	1.51255e-14	1.30614e-12	XP_018379671.1	-	-	-	-	-	-	-	-	-	-
TRINITY_DN11603_c1_g1_i1	768.528	13.2761	1.57638	7.15318	8.47902e-13	4.11072e-11	RYN49508.1	-	-	-	-	-	-	-	-	-	-
TRINITY_DN11611_c0_g1_i1	1207.85	11.5353	1.29646	7.35488	1.91104e-13	1.14141e-11	RYN81326.1	-	-	-	-	-	-	-	-	-	-
TRINITY_DN11617_c0_g1_i1	137.298	8.40487	1.38902	4.61106	4.00628e-06	3.54438e-05	RZR91672.1	-	-	-	-	-	-	-	-	GSMUA_Achr5P11330_001	LBD
TRINITY_DN11626_c0_g1_i2	10496.2	4.26612	0.639775	3.54205	0.000397031	0.00261103	-	-	-	-	-	-	-	-	V	-	-
TRINITY_DN11632_c0_g1_i1	72.5336	9.87114	2.09826	3.75127	0.000175942	0.0012264	RII16260.1	-	-	-	-	-	-	-	-	-	-
TRINITY_DN11633_c0_g1_i1	276.809	11.803	1.99279	4.91924	8.68806e-07	8.56699e-06	KNG49590.1	-	-	-	-	-	-	-	-	-	-
TRINITY_DN11643_c0_g1_i1	239.263	8.14457	1.28231	4.79178	1.65308e-06	1.56162e-05	KNG44241.1	-	-	-	-	-	-	-	-	-	-
TRINITY_DN11664_c0_g1_i1	792.565	13.3206	1.6868	6.71128	1.92923e-11	5.92046e-10	RYN37288.1	-	-	-	-	-	-	-	-	-	-
TRINITY_DN11678_c0_g1_i1	3266.7	15.3638	1.55051	8.61894	6.75742e-18	1.27958e-15	XP_028509960.1	-	-	-	-	-	-	-	-	-	-
TRINITY_DN11680_c0_g1_i1	182.155	11.1993	2.11869	4.34199	1.41196e-05	0.000114748	RAR15985.1	-	-	-	-	-	-	-	-	-	-
TRINITY_DN11680_c0_g3_i1	378.457	8.71538	1.20891	5.55491	2.77754e-08	3.65039e-07	RAR15985.1	-	-	-	-	-	-	-	-	-	-
TRINITY_DN11686_c0_g1_i2	357.568	12.1723	1.60764	6.32747	2.49209e-10	5.44123e-09	RII17955.1	-	-	-	-	-	-	-	-	-	-
TRINITY_DN11686_c0_g2_i1	62.5968	9.65857	2.29675	3.33453	0.000854443	0.00532554	RYN37137.1	-	-	-	-	-	-	-	-	-	-
TRINITY_DN11686_c0_g3_i1	60.1447	9.60092	1.98848	3.82248	0.000132114	0.000939425	RYN37137.1	-	-	-	-	-	-	-	-	-	-
TRINITY_DN11687_c0_g1_i6	264.816	11.7391	1.64962	5.90385	3.55118e-09	5.69741e-08	KAB2111005.1	-	-	-	-	-	-	-	-	-	-
TRINITY_DN11689_c0_g1_i1	188.588	11.2494	1.7119	5.40303	6.55248e-08	7.93267e-07	XP_028506093.1	-	-	-	-	-	-	-	-	-	-
TRINITY_DN1169_c0_g1_i1	22798.2	10.3077	0.718244	11.5667	6.07549e-31	6.75131e-28	OWY46497.1	-	-	-	-	-	-	-	-	-	-
TRINITY_DN117_c0_g1_i2	181.046	6.6671	1.11167	4.19829	2.68943e-05	0.000211139	XP_020252921.1	-	-	-	-	-	-	-	S	-	-
TRINITY_DN11706_c0_g1_i1	216.21	11.4467	1.80423	5.23584	1.64235e-07	1.83519e-06	RAR14763.1	-	-	-	-	-	-	-	-	-	-
TRINITY_DN11706_c0_g2_i1	346.462	12.1268	1.67023	6.06316	1.33474e-09	2.38876e-08	RII14290.1	-	-	-	-	-	-	-	-	-	-
TRINITY_DN11709_c0_g2_i3	482.128	10.1263	1.24966	6.5028	7.88368e-11	1.97804e-09	RYN37858.1	-	-	-	-	-	-	-	-	-	-
TRINITY_DN11728_c0_g1_i1	161.302	8.53127	1.32678	4.92265	8.53792e-07	8.43149e-06	-	-	-	-	-	-	-	-	-	-	-
TRINITY_DN11735_c0_g1_i6	245.779	11.6314	1.63222	5.90079	3.6176e-09	5.78828e-08	XP_018387023.1	-	-	-	-	-	-	-	-	-	-
TRINITY_DN117359_c0_g1_i1	52.0503	9.39246	2.26157	3.26873	0.00108033	0.00661147	NP_001771.1	-	-	-	-	-	-	-	-	-	-
TRINITY_DN11738_c0_g1_i2	31.2275	8.65549	2.36296	2.81659	0.00485371	0.0261926	RYN52158.1	-	-	-	-	-	-	-	-	-	-
TRINITY_DN11741_c0_g1_i4	313.151	11.9809	1.61781	6.16942	6.8542e-10	1.321e-08	RYN42922.1	-	-	-	-	-	-	-	-	-	-
TRINITY_DN11741_c0_g2_i1	47.0407	9.24649	2.1694	3.34032	0.000836832	0.00522349	KNG44554.1	-	-	-	-	-	-	-	-	-	-
TRINITY_DN11744_c1_g1_i1	453.822	12.5162	1.61689	6.50397	7.82261e-11	1.96735e-09	RYN90482.1	-	-	-	-	-	-	-	-	-	-
TRINITY_DN11748_c0_g1_i1	63.0516	9.66905	2.02994	3.77797	0.000158113	0.00111018	XP_008027369.1	-	-	-	-	-	-	-	-	-	-
TRINITY_DN11751_c0_g1_i1	45.7817	9.20726	2.54646	2.83031	0.00465033	0.0251982	KNG51769.1	-	-	-	-	-	-	-	-	-	-
TRINITY_DN11777_c0_g4_i1	73.2059	9.88442	2.20376	3.57771	0.000346619	0.00230136	KNG51756.1	-	-	-	-	-	-	-	-	-	-
TRINITY_DN117795_c0_g1_i1	116.532	10.5549	1.74695	4.89705	9.72854e-07	9.53812e-06	RYN28826.1	-	-	-	-	-	-	-	-	-	-
TRINITY_DN11790_c0_g1_i3	330.51	5.13737	0.950064	3.30227	0.000959064	0.00592862	RZR78504.1	-	-	-	-	-	-	-	V	-	-
TRINITY_DN11792_c0_g1_i1	501.597	12.6606	1.65109	6.45673	1.06989e-10	2.57574e-09	RYN37646.1	-	-	-	-	-	-	-	-	-	-
TRINITY_DN11792_c0_g2_i1	82.0478	5.49669	1.34786	2.59424	0.0094799	0.0483507	RAR05038.1	-	-	-	-	-	-	-	-	-	-
TRINITY_DN11806_c0_g1_i2	391.947	12.3047	1.61883	6.36553	1.94611e-10	4.35036e-09	XP_018386563.1	-	-	-	-	-	-	-	-	-	-
TRINITY_DN11833_c0_g1_i16	115.668	10.5439	1.73335	4.92909	8.26152e-07	8.18342e-06	KAB2106021.1	-	-	-	-	-	-	-	-	-	-
TRINITY_DN11833_c0_g2_i2	26.1091	8.39651	2.25798	2.83284	0.00461359	0.0250184	RYN40419.1	-	-	-	-	-	-	-	-	-	-
TRINITY_DN11834_c0_g3_i1	131.165	7.15311	1.45657	3.53782	0.000403439	0.00265028	XP_001934536.1	-	-	-	-	-	-	-	-	-	-
TRINITY_DN11834_c1_g1_i2	201.962	11.3483	1.80098	5.19067	2.09537e-07	2.29404e-06	RYN78641.1	-	-	-	-	-	-	-	-	-	-
TRINITY_DN11840_c4_g2_i1	66.7264	9.75077	2.08848	3.7112	0.000206281	0.00142307	KNG45462.1	-	-	-	-	-	-	-	-	-	-
TRINITY_DN11841_c0_g1_i2	240.525	11.6002	1.6314	5.88462	3.98964e-09	6.31003e-08	XP_018391864.1	-	-	-	-	-	-	-	-	-	-
TRINITY_DN11851_c0_g1_i7	15197.4	3.6401	0.508395	3.22604	0.00125517	0.0075847	-	-	-	-	-	-	-	-	-	-	-
TRINITY_DN1186_c0_g1_i1	776.504	13.291	1.57215	7.1819	6.8748e-13	3.44777e-11	-	-	-	-	-	-	-	-	-	-	-
TRINITY_DN11866_c0_g1_i1	116.122	5.77985	0.981543	3.85093	0.000117672	0.000843193	XP_020274159.1	-	-	-	-	-	-	-	-	MDP0000285251	C3H
TRINITY_DN11871_c0_g1_i4	122.507	10.6272	1.93478	4.45899	8.23461e-06	6.93089e-05	XP_008023005.1	-	-	-	-	-	-	-	-	-	-
TRINITY_DN11871_c0_g2_i1	1191.5	13.9087	1.56397	7.61444	2.64837e-14	2.08255e-12	KAB2100306.1	-	-	-	-	-	-	-	-	-	-
TRINITY_DN11875_c0_g2_i1	155.979	10.9756	1.77717	5.05052	4.40616e-07	4.56698e-06	XP_018381090.1	-	-	-	-	-	-	-	-	-	-
TRINITY_DN11879_c0_g1_i1	393.898	12.3118	1.59745	6.45518	1.0809e-10	2.5978e-09	RYN55903.1	-	-	-	-	-	-	-	-	-	-
TRINITY_DN11883_c0_g2_i2	158.685	11.0003	1.69346	5.31474	1.0681e-07	1.24216e-06	XP_028510015.1	-	-	-	-	-	-	-	-	-	-
TRINITY_DN118847_c0_g1_i3	294.289	11.8911	1.62615	6.08254	1.18292e-09	2.14936e-08	RYN22332.1	-	-	-	-	-	-	-	-	-	-
TRINITY_DN11887_c0_g1_i3	257.136	11.6964	1.64459	5.89593	3.72588e-09	5.93933e-08	PRQ52345.1	Putative RNA-directed DNA polymerase (EC 2.7.7.49)	RchiOBHm_Chr2g0154461	Rosa chinensis (China rose)	nucleic acid binding [GO:0003676]; RNA-directed DNA polymerase activity [GO:0003964]	-	DNA integration [GO:0015074]	-	-	Rsa1.0_02878.1_g00005.1	LBD
TRINITY_DN11891_c0_g1_i5	92.6564	5.88055	1.46713	2.645	0.00816909	0.0421707	AFW90573.1	Plastocyanin	-	Solanum tuberosum (Potato)	copper ion binding [GO:0005507]; electron transfer activity [GO:0009055]	chloroplast thylakoid membrane [GO:0009535]	-	-	-	-	-
TRINITY_DN118999_c2_g1_i1	424.885	12.4211	1.60651	6.48683	8.76586e-11	2.16466e-09	XP_014550968.1	-	-	-	-	-	-	-	-	-	-
TRINITY_DN11904_c0_g1_i6	249.184	9.15585	1.35668	5.27453	1.33096e-07	1.51775e-06	KAB2103527.1	-	-	-	-	-	-	-	-	-	-
TRINITY_DN11921_c0_g1_i1	124.425	8.29837	1.78303	3.53239	0.000411826	0.00270118	KNG48885.1	-	-	-	-	-	-	-	-	-	-
TRINITY_DN11930_c1_g1_i2	2146.76	10.6296	1.03354	8.34956	6.85175e-17	1.0521e-14	-	-	-	-	-	-	-	-	-	-	-
TRINITY_DN11930_c1_g2_i1	121.614	5.99454	1.52506	2.61927	0.00881193	0.045158	KNG50212.1	-	-	-	-	-	-	-	-	-	-
TRINITY_DN11948_c0_g1_i3	215.253	11.44	1.64104	5.75248	8.79462e-09	1.28457e-07	XP_018385441.1	-	-	-	-	-	-	-	-	-	-
TRINITY_DN11954_c0_g1_i2	398.198	12.3274	1.60255	6.44438	1.16075e-10	2.75903e-09	RYN27868.1	-	-	-	-	-	-	-	-	-	-
TRINITY_DN119546_c0_g1_i1	173.71	11.1307	1.66565	5.4818	4.21029e-08	5.2992e-07	XP_028506128.1	-	-	-	-	-	-	-	-	-	-
TRINITY_DN119606_c0_g1_i2	251.589	11.6652	1.63492	5.91171	3.38579e-09	5.46528e-08	RII05165.1	-	-	-	-	-	-	-	-	-	-
TRINITY_DN11964_c0_g1_i1	660.246	13.0571	1.60664	6.88212	5.89674e-12	2.13004e-10	RYN18823.1	-	-	-	-	-	-	-	-	-	-
TRINITY_DN11978_c0_g1_i1	126.864	10.6774	1.71842	5.04964	4.42637e-07	4.58568e-06	RII15433.1	-	-	-	-	-	-	-	-	-	-
TRINITY_DN119851_c0_g1_i1	142.7	10.8471	1.69427	5.22175	1.77242e-07	1.96751e-06	OWY57143.1	-	-	-	-	-	-	-	-	-	-
TRINITY_DN119862_c0_g1_i1	129.379	8.15456	1.8326	3.35838	0.000784021	0.00492076	RAR05543.1	-	-	-	-	-	-	-	-	-	-
TRINITY_DN119881_c0_g1_i2	258.418	11.7039	1.66022	5.84492	5.06806e-09	7.82197e-08	KAB2104576.1	-	-	-	-	-	-	-	-	-	-
TRINITY_DN119907_c0_g1_i2	124.254	10.647	1.7682	4.89031	1.00679e-06	9.84802e-06	RII07695.1	-	-	-	-	-	-	-	-	-	-
TRINITY_DN1200_c0_g4_i7	52750.7	6.36059	0.785292	5.55283	2.81085e-08	3.68614e-07	RWW16172.1	Uncharacterized protein	GW17_00019953	Ensete ventricosum (Abyssinian banana) (Musa ensete)	transferase activity, transferring acyl groups other than amino-acyl groups [GO:0016747]	-	-	-	-	-	-
TRINITY_DN120016_c0_g1_i5	195.429	11.3006	1.65817	5.60893	2.03578e-08	2.75175e-07	XP_018389156.1	-	-	-	-	-	-	-	-	-	-
TRINITY_DN120031_c0_g1_i2	161.414	11.0249	1.68257	5.36376	8.15082e-08	9.69534e-07	XP_028503232.1	-	-	-	-	-	-	-	-	-	-
TRINITY_DN12012_c0_g1_i2	665.884	13.0693	1.57637	7.02201	2.187e-12	9.15265e-11	RYN58358.1	-	-	-	-	-	-	-	-	-	-
TRINITY_DN12013_c0_g1_i1	220.92	8.91325	2.04729	3.37678	0.000733408	0.00462681	NP_001839.2	-	-	-	-	-	-	-	-	-	-
TRINITY_DN12018_c0_g2_i1	2231.19	14.8137	1.55386	8.24638	1.63265e-16	2.33701e-14	XP_018386481.1	-	-	-	-	-	-	-	-	-	-
TRINITY_DN1202_c0_g1_i2	4017.65	5.45579	0.574492	6.01538	1.7946e-09	3.11727e-08	XP_020095027.1	UDP-glycosyltransferase 83A1 (UDP-glycosyltransferase 83A1-like)	LOC109714741 ACMD2_06179	Ananas comosus (Pineapple) (Ananas ananas)	UDP-glycosyltransferase activity [GO:0008194]	-	-	-	-	-	-
TRINITY_DN120245_c1_g1_i1	197.236	11.314	1.66398	5.59745	2.1753e-08	2.91886e-07	XP_028511292.1	-	-	-	-	-	-	-	-	-	-
TRINITY_DN120406_c1_g1_i1	117.798	10.5705	1.74048	4.92419	8.47084e-07	8.377e-06	RII09951.1	-	-	-	-	-	-	-	-	-	-
TRINITY_DN12041_c0_g1_i2	37170.6	4.11665	0.562417	3.76348	0.000167564	0.00117226	XP_020244575.1	-	-	-	-	-	-	-	-	Lus10007348	MYB_related
TRINITY_DN120434_c0_g1_i1	34282.8	6.79929	0.616231	7.78814	6.80013e-15	6.48192e-13	ASV46320.1	Beta 1,3-glucanase	-	Lilium regale (Regal lily)	hydrolase activity, hydrolyzing O-glycosyl compounds [GO:0004553]	-	carbohydrate metabolic process [GO:0005975]	-	-	-	-
TRINITY_DN120451_c0_g1_i1	167.244	11.076	1.67226	5.4274	5.71823e-08	6.99895e-07	OWY43241.1	-	-	-	-	-	-	-	-	-	-
TRINITY_DN120483_c0_g1_i2	113.801	4.90759	1.05689	2.75108	0.00594	0.0315309	-	-	-	-	-	-	-	-	O	-	-
TRINITY_DN120483_c2_g1_i1	234.091	9.11815	1.55304	4.58335	4.57575e-06	4.00872e-05	RWR88664.1	Protein P21-like protein	CKAN_01769700	Cinnamomum micranthum f. kanehirae	-	-	-	-	-	-	-
TRINITY_DN120574_c0_g1_i1	291.28	11.8764	1.61608	6.11131	9.88155e-10	1.82932e-08	OWY42355.1	-	-	-	-	-	-	-	-	-	-
TRINITY_DN120574_c1_g1_i1	32.2987	8.70413	2.50069	2.68091	0.00734222	0.0382058	KNG46033.1	-	-	-	-	-	-	-	-	-	-
TRINITY_DN120659_c0_g1_i2	146.009	10.8799	1.69968	5.22446	1.74666e-07	1.93942e-06	KAB2109931.1	-	-	-	-	-	-	-	-	-	-
TRINITY_DN12068_c0_g1_i1	108.56	10.4527	1.75579	4.81418	1.47804e-06	1.40792e-05	XP_018382364.1	-	-	-	-	-	-	-	-	-	-
TRINITY_DN12069_c0_g1_i1	98.6557	6.72043	1.71535	2.75188	0.00592541	0.0314599	KNG51222.1	-	-	-	-	-	-	-	-	-	-
TRINITY_DN12071_c0_g1_i1	353.586	8.71554	0.96177	6.98248	2.90012e-12	1.15969e-10	-	-	-	-	-	-	-	-	-	-	-
TRINITY_DN12072_c0_g1_i1	405.268	12.3529	1.60544	6.44867	1.12837e-10	2.68741e-09	XP_028511814.1	-	-	-	-	-	-	-	-	-	-
TRINITY_DN12074_c0_g1_i1	553.499	12.8026	1.60212	6.74273	1.55442e-11	4.88018e-10	XP_018386987.1	-	-	-	-	-	-	-	-	-	-
TRINITY_DN120798_c0_g1_i1	308.694	7.5107	0.839582	6.56363	5.25147e-11	1.39205e-09	OWY42789.1	-	-	-	-	-	-	-	-	-	-
TRINITY_DN120809_c0_g1_i1	49.9838	9.334	2.3622	3.10473	0.0019045	0.0111233	KNG51675.1	-	-	-	-	-	-	-	-	-	-
TRINITY_DN12081_c0_g1_i5	633.56	5.67631	0.978176	3.75833	0.000171049	0.00119564	THU48966.1	Fatty acid hydroxylase domain-containing protein	C4D60_Mb06t04580	Musa balbisiana (Banana)	iron ion binding [GO:0005506]; oxidoreductase activity [GO:0016491]	integral component of membrane [GO:0016021]	lipid biosynthetic process [GO:0008610]	-	-	-	-
TRINITY_DN12082_c0_g1_i1	1382.51	14.1232	1.58434	7.6519	1.98039e-14	1.65596e-12	KAB2100449.1	-	-	-	-	-	-	-	-	-	-
TRINITY_DN12098_c0_g1_i1	45.7817	9.20726	2.54646	2.83031	0.00465033	0.0251982	XP_007691840.1	-	-	-	-	-	-	-	-	-	-
TRINITY_DN12104_c0_g1_i1	196.582	8.35358	1.26444	5.02484	5.03855e-07	5.17168e-06	XP_020276078.1	-	-	-	-	-	-	-	S	evm.model.supercontig_104.9	NF-YA
TRINITY_DN12107_c0_g3_i1	66.7418	6.41116	1.54052	2.86343	0.00419086	0.0229084	-	-	-	-	-	-	-	-	I	-	-
TRINITY_DN1211_c0_g1_i1	912.88	11.0592	1.18743	7.6293	2.36026e-14	1.90204e-12	XP_018385590.1	-	-	-	-	-	-	-	-	-	-
TRINITY_DN1211_c0_g2_i2	93.9788	7.87815	1.60825	3.65499	0.000257191	0.00174733	RII16213.1	-	-	-	-	-	-	-	-	-	-
TRINITY_DN121130_c0_g1_i3	715.16	13.1723	1.58442	7.05134	1.772e-12	7.61978e-11	XP_028505663.1	-	-	-	-	-	-	-	-	-	-
TRINITY_DN121157_c0_g1_i4	401.877	9.86635	1.2335	6.37725	1.80291e-10	4.07555e-09	KAB2109431.1	-	-	-	-	-	-	-	-	-	-
TRINITY_DN12125_c0_g1_i1	84.2731	10.0875	1.99973	4.04432	5.24759e-05	0.000396192	XP_018385555.1	-	-	-	-	-	-	-	-	-	-
TRINITY_DN12125_c0_g2_i1	729.971	13.2018	1.57299	7.12137	1.06863e-12	5.01389e-11	XP_018385555.1	-	-	-	-	-	-	-	-	-	-
TRINITY_DN12130_c0_g1_i2	1227.16	11.4806	1.21812	7.78301	7.08173e-15	6.72001e-13	KAB2111397.1	-	-	-	-	-	-	-	-	-	-
TRINITY_DN12130_c0_g2_i2	102.571	10.3709	2.18732	3.82702	0.000129704	0.000923306	KNG50809.1	-	-	-	-	-	-	-	-	-	-
TRINITY_DN12134_c0_g1_i2	78.5418	9.98592	2.12519	3.75775	0.000171448	0.00119823	KNG49892.1	-	-	-	-	-	-	-	-	-	-
TRINITY_DN121359_c0_g1_i1	96.7508	10.2865	1.77172	4.67709	2.90974e-06	2.63839e-05	XP_028506303.1	-	-	-	-	-	-	-	-	-	-
TRINITY_DN121359_c0_g2_i1	58.5923	9.56283	1.88907	4.00347	6.24208e-05	0.000464875	XP_018382485.1	-	-	-	-	-	-	-	-	-	-
TRINITY_DN121380_c0_g1_i1	531.911	12.7451	1.60247	6.70533	2.00949e-11	6.10945e-10	OWY46973.1	-	-	-	-	-	-	-	-	-	-
TRINITY_DN121385_c0_g2_i1	282.965	11.8344	1.70252	5.7764	7.63151e-09	1.13201e-07	RII23041.1	-	-	-	-	-	-	-	-	-	-
TRINITY_DN12144_c0_g1_i3	41.6321	9.0692	2.19036	3.22741	0.00124917	0.0075539	RYN52240.1	-	-	-	-	-	-	-	-	-	-
TRINITY_DN12146_c0_g1_i1	147.628	24.1134	4.78516	4.62125	3.81437e-06	3.38951e-05	KNG46571.1	-	-	-	-	-	-	-	-	-	-
TRINITY_DN12146_c0_g2_i2	567.25	10.3439	1.35751	6.14646	7.92314e-10	1.49897e-08	XP_018387222.1	-	-	-	-	-	-	-	-	-	-
TRINITY_DN12159_c0_g1_i12	5161.91	10.054	0.738774	10.9018	1.13018e-27	7.69744e-25	-	-	-	-	-	-	-	-	-	-	-
TRINITY_DN1216_c0_g2_i2	609.784	12.9423	1.58103	6.92099	4.48486e-12	1.67743e-10	RYN98234.1	-	-	-	-	-	-	-	-	-	-
TRINITY_DN12161_c0_g1_i1	67.4021	9.76525	2.28941	3.39181	0.000694318	0.00439433	RAR12768.1	-	-	-	-	-	-	-	-	-	-
TRINITY_DN12161_c0_g2_i1	453.298	12.5146	1.69331	6.20948	5.31589e-10	1.06335e-08	XP_028502960.1	-	-	-	-	-	-	-	-	-	-
TRINITY_DN12163_c0_g1_i1	91.2899	10.2029	2.13624	3.83986	0.000123103	0.000878827	KNG45521.1	-	-	-	-	-	-	-	-	-	-
TRINITY_DN12163_c0_g2_i1	394.036	12.3124	1.63718	6.2989	2.99764e-10	6.4027e-09	XP_018385795.1	-	-	-	-	-	-	-	-	-	-
TRINITY_DN1218_c0_g1_i1	1197.2	11.4473	1.20504	7.83987	4.50996e-15	4.52356e-13	XP_028503573.1	-	-	-	-	-	-	-	-	-	-
TRINITY_DN12180_c0_g1_i5	251.158	11.6625	1.62918	5.93091	3.0126e-09	4.93266e-08	RYN58365.1	-	-	-	-	-	-	-	-	-	-
TRINITY_DN12180_c0_g2_i2	103.468	10.3835	1.80544	4.64344	3.42652e-06	3.06941e-05	XP_014076566.1	-	-	-	-	-	-	-	-	-	-
TRINITY_DN12184_c0_g1_i2	73.2317	7.5043	1.48053	3.7178	0.000200966	0.00138913	XP_028505527.1	-	-	-	-	-	-	-	-	-	-
TRINITY_DN121930_c0_g1_i1	70.7274	9.83477	2.03538	3.8493	0.000118456	0.000848233	RYN50356.1	-	-	-	-	-	-	-	-	-	-
TRINITY_DN121930_c1_g1_i1	40.8051	9.04137	2.31484	3.04184	0.00235138	0.0135035	KNG45412.1	-	-	-	-	-	-	-	-	-	-
TRINITY_DN12210_c0_g1_i1	33.5278	8.75678	2.44902	2.75897	0.00579831	0.0308253	RLN18639.1	Uncharacterized protein	C2845_PM02G09080	Panicum miliaceum (Proso millet) (Broomcorn millet)	-	-	response to auxin [GO:0009733]	-	-	-	-
TRINITY_DN122137_c0_g1_i1	188.422	11.2479	1.6671	5.54728	2.90152e-08	3.79679e-07	RYN38310.1	-	-	-	-	-	-	-	-	-	-
TRINITY_DN12219_c0_g1_i2	965.836	13.6058	1.5684	7.39975	1.36441e-13	8.6861e-12	XP_028506241.1	-	-	-	-	-	-	-	-	-	-
TRINITY_DN122207_c0_g1_i1	152.011	10.9383	1.69295	5.27971	1.2939e-07	1.4819e-06	KAB2100974.1	-	-	-	-	-	-	-	-	-	-
TRINITY_DN12223_c0_g1_i2	313.393	5.39465	1.21078	2.8037	0.00505204	0.0271865	-	-	-	-	-	-	-	-	-	-	-
TRINITY_DN122239_c0_g1_i3	113.282	10.5142	1.82984	4.653	3.27145e-06	2.9411e-05	RYN46238.1	-	-	-	-	-	-	-	-	-	-
TRINITY_DN12225_c2_g1_i12	241.064	24.6508	4.785	4.73371	2.20456e-06	2.0397e-05	-	-	-	-	-	-	-	-	-	-	-
TRINITY_DN122250_c0_g2_i1	53.8564	9.44159	2.44479	3.04386	0.00233565	0.0134315	KNG51558.1	-	-	-	-	-	-	-	-	-	-
TRINITY_DN12229_c0_g1_i2	84.998	10.0994	1.78653	4.53362	5.79802e-06	4.99354e-05	RYN85648.1	-	-	-	-	-	-	-	-	-	-
TRINITY_DN12230_c0_g1_i5	416.922	12.3938	1.59697	6.50844	7.59357e-11	1.91549e-09	RYN22273.1	-	-	-	-	-	-	-	-	-	-
TRINITY_DN12230_c1_g1_i1	69.5838	9.81121	1.93523	4.03633	5.42944e-05	0.000408461	XP_018381684.1	-	-	-	-	-	-	-	-	-	-
TRINITY_DN12232_c0_g1_i3	868.367	13.4523	1.57852	7.25513	4.01285e-13	2.16824e-11	XP_018383740.1	-	-	-	-	-	-	-	-	-	-
TRINITY_DN12235_c0_g1_i4	252.384	11.6698	1.66556	5.80572	6.40915e-09	9.67951e-08	RYO01815.1	-	-	-	-	-	-	-	-	-	-
TRINITY_DN12237_c0_g1_i1	90.3504	10.1878	1.79533	4.56061	5.10043e-06	4.44166e-05	XP_018380794.1	-	-	-	-	-	-	-	-	-	-
TRINITY_DN122381_c0_g1_i3	125.586	10.663	2.01532	4.29856	1.71911e-05	0.000138324	RAR02395.1	-	-	-	-	-	-	-	-	ONIVA03G38180.1	LBD
TRINITY_DN122381_c0_g2_i1	134.194	10.7586	2.00864	4.36047	1.29782e-05	0.000106002	RAR02395.1	-	-	-	-	-	-	-	-	ONIVA03G38180.1	LBD
TRINITY_DN12243_c0_g2_i1	1195.1	11.4423	1.21887	7.74681	9.42291e-15	8.59398e-13	RYN29708.1	-	-	-	-	-	-	-	-	-	-
TRINITY_DN12244_c0_g1_i1	4784.12	6.89727	0.634641	7.71659	1.19482e-14	1.05773e-12	XP_020244065.1	-	-	-	-	-	-	-	S	-	-
TRINITY_DN12244_c1_g1_i1	43.6427	9.13833	2.34901	3.03887	0.00237468	0.0136224	KNG47451.1	-	-	-	-	-	-	-	-	-	-
TRINITY_DN12244_c1_g2_i1	191.966	11.275	1.66616	5.56668	2.59646e-08	3.43593e-07	-	-	-	-	-	-	-	-	-	-	-
TRINITY_DN122493_c1_g1_i1	63.7733	9.68533	1.90908	4.02568	5.68104e-05	0.000425644	KAB2099532.1	-	-	-	-	-	-	-	-	-	-
TRINITY_DN12252_c0_g1_i1	1084.2	13.7725	1.57377	7.48045	7.40688e-14	5.16122e-12	OWY49862.1	-	-	-	-	-	-	-	-	-	-
TRINITY_DN12256_c0_g1_i1	306.352	8.50729	1.00416	6.48034	9.1515e-11	2.24284e-09	XP_028507809.1	-	-	-	-	-	-	-	-	-	-
TRINITY_DN122624_c0_g1_i2	252.057	11.6678	1.63558	5.91095	3.40139e-09	5.48333e-08	XP_018387859.1	-	-	-	-	-	-	-	-	-	-
TRINITY_DN12273_c1_g1_i1	230.505	5.36151	1.03083	3.26096	0.00111035	0.00677263	XP_020276386.1	-	-	-	-	-	-	-	-	GSMUA_Achr7P25320_001	TCP
TRINITY_DN12273_c3_g1_i1	328.631	5.38921	0.972616	3.48463	0.000492815	0.00319125	-	-	-	-	-	-	-	-	-	-	-
TRINITY_DN122743_c0_g1_i1	118.888	10.5837	1.72189	4.98504	6.19488e-07	6.25517e-06	XP_018389986.1	-	-	-	-	-	-	-	-	-	-
TRINITY_DN1228_c0_g1_i7	8163.99	7.52657	1.2546	4.40506	1.05754e-05	8.75797e-05	XP_020252449.1	-	-	-	-	-	-	-	-	TRIUR3_17264-P1	GRAS
TRINITY_DN122801_c0_g1_i1	104.189	10.3934	1.76051	4.76759	1.86444e-06	1.74605e-05	XP_018389704.1	-	-	-	-	-	-	-	-	-	-
TRINITY_DN122884_c1_g1_i1	119.94	10.5965	1.75997	4.8845	1.03692e-06	1.01193e-05	-	-	-	-	-	-	-	-	-	-	-
TRINITY_DN12292_c0_g2_i1	172.349	8.74966	1.54223	4.37656	1.20566e-05	9.88958e-05	RAQ99726.1	-	-	-	-	-	-	-	-	-	-
TRINITY_DN12293_c0_g1_i3	695.27	10.6588	1.22802	7.05105	1.77577e-12	7.62823e-11	RYN55997.1	-	-	-	-	-	-	-	-	-	-
TRINITY_DN122956_c0_g1_i1	65.4177	9.72154	1.87089	4.1272	3.67211e-05	0.000283478	XP_018383910.1	-	-	-	-	-	-	-	-	-	-
TRINITY_DN12297_c0_g2_i4	11555.2	12.6142	1.11932	9.48276	2.4764e-21	8.71423e-19	-	-	-	-	-	-	-	-	-	-	-
TRINITY_DN12297_c0_g3_i1	269.858	11.7661	1.62633	6.005	1.91336e-09	3.29374e-08	-	-	-	-	-	-	-	-	-	-	-
TRINITY_DN12297_c1_g4_i1	533.925	12.7507	1.60547	6.69631	2.13743e-11	6.42606e-10	XP_028506353.1	-	-	-	-	-	-	-	-	-	-
TRINITY_DN1230_c0_g1_i7	1398.36	4.31093	0.714786	3.23304	0.0012248	0.00741607	XP_020271356.1	-	-	-	-	-	-	-	-	-	-
TRINITY_DN12305_c0_g1_i1	48.2436	9.28292	2.2034	3.30531	0.000948731	0.00586904	KNG45323.1	-	-	-	-	-	-	-	-	-	-
TRINITY_DN12306_c0_g1_i1	7558.93	10.4683	0.771368	10.9783	4.85961e-28	3.73103e-25	XP_014083317.1	-	-	-	-	-	-	-	-	-	-
TRINITY_DN12313_c0_g1_i1	3360.19	10.4981	1.12056	7.58382	3.35515e-14	2.58065e-12	XP_028511046.1	-	-	-	-	-	-	-	-	-	-
TRINITY_DN12314_c0_g1_i1	46.6715	9.23511	2.13036	3.3962	0.000683286	0.0043297	EMD91904.1	-	-	-	-	-	-	-	-	XP_010558920.1	C2H2
TRINITY_DN12323_c0_g1_i3	84.4211	10.0895	1.81028	4.46863	7.8724e-06	6.64855e-05	-	-	-	-	-	-	-	-	-	-	-
TRINITY_DN12343_c0_g1_i2	308.208	11.9579	1.61513	6.16542	7.0295e-10	1.35109e-08	XP_018387188.1	-	-	-	-	-	-	-	-	-	-
TRINITY_DN123504_c0_g1_i2	205.069	11.37	1.65035	5.6776	1.36595e-08	1.91183e-07	XP_018387730.1	-	-	-	-	-	-	-	-	Migut.H00513.1.p	C2H2
TRINITY_DN123517_c0_g1_i1	71.8643	9.85739	1.82821	4.29785	1.72464e-05	0.000138717	OWY45349.1	-	-	-	-	-	-	-	-	-	-
TRINITY_DN123528_c1_g1_i1	132.124	10.7359	1.70213	5.13237	2.8612e-07	3.06261e-06	RYN20781.1	-	-	-	-	-	-	-	-	-	-
TRINITY_DN12356_c0_g1_i1	367.591	12.2122	1.64515	6.20747	5.38431e-10	1.075e-08	XP_028507167.1	-	-	-	-	-	-	-	-	-	-
TRINITY_DN12358_c0_g1_i1	102.492	10.3699	1.99159	4.20261	2.6385e-05	0.000207247	KNG52269.1	-	-	-	-	-	-	-	-	-	-
TRINITY_DN12358_c0_g2_i1	1072.42	10.3192	0.934662	8.9008	5.54455e-19	1.31534e-16	RMZ66166.1	-	-	-	-	-	-	-	-	-	-
TRINITY_DN12367_c0_g1_i1	2738.49	4.83012	1.09164	2.59254	0.00952702	0.0485342	XP_020257195.1	-	-	-	-	-	-	-	-	-	-
TRINITY_DN12378_c0_g1_i1	1179.15	13.8937	1.56197	7.61452	2.64675e-14	2.08255e-12	KAB2105074.1	-	-	-	-	-	-	-	-	-	-
TRINITY_DN123862_c0_g1_i3	154.898	10.9653	1.67852	5.34123	9.23189e-08	1.08771e-06	RYN55157.1	-	-	-	-	-	-	-	-	-	-
TRINITY_DN12410_c0_g2_i1	840.723	10.0506	1.19778	6.72122	1.80208e-11	5.57717e-10	XP_028501839.1	-	-	-	-	-	-	-	-	-	-
TRINITY_DN12411_c0_g1_i1	141.84	7.24459	1.78567	2.93704	0.00331366	0.0184647	KNG45365.1	-	-	-	-	-	-	-	-	-	-
TRINITY_DN12414_c0_g1_i2	205.627	11.3742	1.69202	5.54026	3.02015e-08	3.92889e-07	KAB2108477.1	-	-	-	-	-	-	-	-	-	-
TRINITY_DN12417_c1_g1_i1	44.7699	9.1751	2.1441	3.34644	0.000818568	0.0051178	KNG47002.1	-	-	-	-	-	-	-	-	-	-
TRINITY_DN12418_c0_g1_i1	98.794	10.3163	1.76907	4.70097	2.58933e-06	2.36206e-05	XP_028501510.1	-	-	-	-	-	-	-	-	-	-
TRINITY_DN124211_c0_g1_i1	155.096	10.9674	1.72523	5.1978	2.01665e-07	2.21927e-06	KAB2107789.1	-	-	-	-	-	-	-	-	-	-
TRINITY_DN1243_c0_g1_i1	3848.1	12.5693	0.991216	10.6629	1.51713e-26	9.56179e-24	RYN57086.1	-	-	-	-	-	-	-	-	-	-
TRINITY_DN1243_c0_g2_i1	472.608	12.5747	1.86014	5.68491	1.30884e-08	1.84229e-07	KNG52257.1	-	-	-	-	-	-	-	-	-	-
TRINITY_DN124314_c0_g1_i1	243.607	11.6186	1.63126	5.89642	3.71477e-09	5.92385e-08	OWY43150.1	-	-	-	-	-	-	-	-	-	-
TRINITY_DN124332_c0_g1_i2	107.047	10.4323	1.73803	4.85164	1.22443e-06	1.1837e-05	OWY41588.1	-	-	-	-	-	-	-	-	-	-
TRINITY_DN124337_c0_g1_i1	385.796	12.2817	1.6237	6.33228	2.41564e-10	5.28525e-09	OWY48319.1	-	-	-	-	-	-	-	-	-	-
TRINITY_DN12436_c0_g1_i5	1992.38	7.05273	0.719961	7.01806	2.24963e-12	9.34073e-11	-	-	-	-	-	-	-	-	-	-	-
TRINITY_DN12446_c0_g1_i1	705.355	10.6784	1.23495	7.02735	2.10491e-12	8.8354e-11	-	-	-	-	-	-	-	-	-	-	-
TRINITY_DN124482_c1_g1_i1	1565.29	5.45126	0.595895	5.79173	6.96642e-09	1.04316e-07	AAA32640.1	Chitinase (EC 3.2.1.14) (Fragment)	chitinase	Allium sativum (Garlic)	chitinase activity [GO:0004568]; chitin binding [GO:0008061]	-	cell wall macromolecule catabolic process [GO:0016998]; chitin catabolic process [GO:0006032]; polysaccharide catabolic process [GO:0000272]	-	O	Peinf101Scf00562g09013.1	NAC
TRINITY_DN124493_c0_g1_i2	220.784	11.4766	1.63927	5.78099	7.42635e-09	1.1042e-07	RYN35136.1	-	-	-	-	-	-	-	-	-	-
TRINITY_DN124511_c0_g1_i1	35.0342	8.82141	2.43378	2.8028	0.00506608	0.0272551	RII13006.1	-	-	-	-	-	-	-	-	-	-
TRINITY_DN1246_c0_g1_i4	1521.3	14.2613	1.59461	7.6892	1.4806e-14	1.2838e-12	XP_018388781.1	-	-	-	-	-	-	-	-	-	-
TRINITY_DN12465_c0_g1_i5	111.618	7.9522	1.70281	3.49552	0.000473132	0.00307463	XP_008020673.1	-	-	-	-	-	-	-	-	-	-
TRINITY_DN12472_c0_g1_i2	1922.45	4.86194	0.583858	4.90178	9.49744e-07	9.31804e-06	-	-	-	-	-	-	-	-	-	-	-
TRINITY_DN12482_c0_g1_i3	183.7	11.2115	1.6783	5.48859	4.05155e-08	5.11924e-07	XP_018379582.1	-	-	-	-	-	-	-	-	-	-
TRINITY_DN124851_c0_g2_i1	38.6364	8.96259	2.34065	2.97464	0.00293337	0.0165157	RYN59510.1	-	-	-	-	-	-	-	-	-	-
TRINITY_DN12486_c0_g1_i1	158.322	10.997	1.7019	5.28646	1.24707e-07	1.43449e-06	RYN76024.1	-	-	-	-	-	-	-	-	-	-
TRINITY_DN12489_c0_g1_i4	110.323	10.4755	1.77132	4.78484	1.71126e-06	1.61262e-05	RYN71821.1	-	-	-	-	-	-	-	-	-	-
TRINITY_DN1249_c0_g1_i42	24433.4	3.91698	0.578636	3.31294	0.000923222	0.00571794	XP_020267505.1	-	-	-	-	-	-	-	S	-	-
TRINITY_DN124913_c0_g1_i7	58.8097	9.56777	1.94075	3.89941	9.64255e-05	0.000699495	RAR11676.1	-	-	-	-	-	-	-	-	-	-
TRINITY_DN12492_c0_g1_i14	448.624	12.4996	1.60094	6.55837	5.4399e-11	1.43302e-09	OWY41536.1	-	-	-	-	-	-	-	-	-	-
TRINITY_DN12494_c1_g1_i1	261.426	4.95885	0.655778	4.51197	6.42295e-06	5.48477e-05	XP_020243734.1	-	-	-	-	-	-	-	-	Lus10023829	bHLH
TRINITY_DN1250_c0_g1_i19	836.395	6.95585	1.47989	3.3488	0.000811625	0.00507891	XP_020240892.1	-	-	-	-	-	-	-	-	MDP0000270344	BES1
TRINITY_DN1250_c0_g2_i1	570.855	6.89463	1.45212	3.37067	0.00074986	0.0047232	XP_020240892.1	-	-	-	-	-	-	-	-	MDP0000270344	BES1
TRINITY_DN12502_c0_g1_i1	267.884	11.7555	1.63125	5.98041	2.22581e-09	3.77921e-08	XP_018383823.1	-	-	-	-	-	-	-	-	-	-
TRINITY_DN12514_c0_g1_i1	268.862	4.95127	1.02494	2.87945	0.00398365	0.0218777	-	-	-	-	-	-	-	-	-	-	-
TRINITY_DN12522_c0_g1_i1	79.8468	10.0096	1.83299	4.36967	1.24436e-05	0.000101912	OWY41404.1	-	-	-	-	-	-	-	-	-	-
TRINITY_DN12524_c1_g1_i2	144.427	10.8644	1.68817	5.25086	1.51391e-07	1.70429e-06	KAB2110075.1	-	-	-	-	-	-	-	-	-	-
TRINITY_DN1253_c1_g1_i1	423.616	7.61019	1.19018	4.71375	2.43204e-06	2.2311e-05	KAB0349701.1	-	-	-	-	-	-	-	-	-	-
TRINITY_DN1253_c1_g2_i1	406.528	8.78541	1.53825	4.41114	1.02829e-05	8.53243e-05	KAB0349701.1	-	-	-	-	-	-	-	-	-	-
TRINITY_DN12534_c1_g1_i2	160.237	8.62855	1.38645	4.78095	1.74472e-06	1.64085e-05	XP_009385345.1	-	-	-	-	-	-	-	-	MDP0000320566	NAC
TRINITY_DN12536_c0_g1_i1	95.6859	10.27	2.07702	3.98167	6.84331e-05	0.000507092	XP_018391009.1	-	-	-	-	-	-	-	-	-	-
TRINITY_DN125695_c1_g1_i1	221.818	11.4832	2.08018	4.55882	5.14408e-06	4.47597e-05	-	-	-	-	-	-	-	-	-	-	-
TRINITY_DN1257_c0_g1_i2	1147.04	13.8538	1.65311	7.17061	7.46624e-13	3.69609e-11	XP_028512310.1	-	-	-	-	-	-	-	-	-	-
TRINITY_DN12576_c0_g1_i1	158.639	11	1.74397	5.16064	2.46108e-07	2.66267e-06	XP_018380386.1	-	-	-	-	-	-	-	-	-	-
TRINITY_DN125776_c0_g2_i1	575.271	7.90891	1.01851	5.80154	6.5709e-09	9.89902e-08	-	-	-	-	-	-	-	-	-	-	-
TRINITY_DN1258_c0_g1_i8	63175.7	14.2868	0.918084	13.3831	7.58989e-41	2.67082e-37	-	-	-	-	-	-	-	-	-	-	-
TRINITY_DN1258_c0_g2_i1	2852.48	7.83387	1.14883	5.07811	3.81199e-07	3.99229e-06	-	-	-	-	-	-	-	-	-	-	-
TRINITY_DN12581_c0_g1_i2	50.5934	9.35122	1.95324	3.76361	0.000167479	0.00117185	RYN55314.1	-	-	-	-	-	-	-	-	-	-
TRINITY_DN125830_c0_g1_i1	117.138	10.5619	1.8492	4.63004	3.65601e-06	3.26114e-05	RYN31158.1	-	-	-	-	-	-	-	-	Cc10_g03650	G2-like
TRINITY_DN12591_c2_g1_i1	292.187	11.881	1.67243	5.90822	3.45834e-09	5.56537e-08	RYN21848.1	-	-	-	-	-	-	-	-	-	-
TRINITY_DN125976_c0_g2_i1	59.1856	9.57779	2.11141	3.58897	0.000331985	0.00221011	CDR39931.1	-	-	-	-	-	-	-	-	-	-
TRINITY_DN12598_c0_g1_i1	316.767	11.9975	1.62649	6.14668	7.91204e-10	1.49754e-08	RYO62225.1	-	-	-	-	-	-	-	-	-	-
TRINITY_DN12598_c0_g2_i1	57.8772	9.5455	2.01034	3.75334	0.000174491	0.00121749	RYO62225.1	-	-	-	-	-	-	-	-	676752188	C2H2
TRINITY_DN12602_c0_g1_i2	195.772	11.3033	1.67025	5.57003	2.54699e-08	3.3747e-07	XP_018385685.1	-	-	-	-	-	-	-	-	-	-
TRINITY_DN12603_c0_g1_i5	3371.72	15.4094	1.55144	8.6432	5.4662e-18	1.06369e-15	OQD71752.1	-	-	-	-	-	-	-	-	-	-
TRINITY_DN12603_c0_g2_i1	104.318	10.3953	1.90448	4.40821	1.04228e-05	8.63834e-05	RKK08135.1	-	-	-	-	-	-	-	-	-	-
TRINITY_DN12603_c0_g4_i1	73.1927	9.88419	1.98298	3.97593	7.01055e-05	0.000518177	OQD71752.1	-	-	-	-	-	-	-	-	-	-
TRINITY_DN12614_c0_g1_i1	73.3904	7.31915	2.01976	2.63356	0.00844953	0.0434954	RAR00329.1	-	-	-	-	-	-	-	-	-	-
TRINITY_DN1262_c0_g1_i1	413.383	10.013	1.53678	5.21416	1.84648e-07	2.04489e-06	KNG44104.1	-	-	-	-	-	-	-	-	-	-
TRINITY_DN12621_c0_g1_i1	399.988	12.3341	1.62075	6.37609	1.81665e-10	4.10224e-09	KAB2101592.1	-	-	-	-	-	-	-	-	-	-
TRINITY_DN12629_c0_g1_i1	1087.33	4.51381	0.869713	2.89039	0.00384763	0.0211748	XP_019710905.1	RING-type E3 ubiquitin transferase (EC 2.3.2.27)	LOC105059493	Elaeis guineensis var. tenera (Oil palm)	transferase activity [GO:0016740]	integral component of membrane [GO:0016021]	protein ubiquitination [GO:0016567]	-	O	-	-
TRINITY_DN1263_c0_g1_i1	2164.21	12.3654	1.20343	8.61322	7.10375e-18	1.3332e-15	KAB2105796.1	-	-	-	-	-	-	-	-	-	-
TRINITY_DN1263_c0_g2_i1	274.014	8.46625	1.60935	4.01792	5.87133e-05	0.000438967	KNG52658.1	-	-	-	-	-	-	-	-	-	-
TRINITY_DN12639_c0_g1_i1	243.353	8.07841	1.19178	5.10028	3.39151e-07	3.58212e-06	-	-	-	-	-	-	-	-	-	-	-
TRINITY_DN12640_c0_g1_i15	983.482	11.1646	1.19941	7.64088	2.15749e-14	1.77246e-12	PZD04097.1	-	-	-	-	-	-	-	-	-	-
TRINITY_DN12642_c0_g2_i1	311.308	3.66567	0.594751	2.80062	0.00510038	0.0274152	XP_020259763.1	-	-	-	-	-	-	-	-	-	-
TRINITY_DN12648_c0_g1_i1	464.328	9.03228	1.06902	6.57822	4.76116e-11	1.27976e-09	XP_028505260.1	-	-	-	-	-	-	-	-	-	-
TRINITY_DN126501_c0_g1_i2	176.96	11.1573	1.66637	5.49538	3.89872e-08	4.95216e-07	XP_018387778.1	-	-	-	-	-	-	-	-	-	-
TRINITY_DN12653_c0_g1_i1	63.9942	9.69045	2.17273	3.53953	0.000400834	0.00263399	KNG49395.1	-	-	-	-	-	-	-	-	-	-
TRINITY_DN12653_c0_g2_i1	648.107	11.5838	1.52676	6.27723	3.44658e-10	7.28423e-09	RYN36490.1	-	-	-	-	-	-	-	-	-	-
TRINITY_DN12658_c0_g1_i8	5018.64	3.71952	0.541471	3.17564	0.00149507	0.00889566	-	-	-	-	-	-	-	-	-	-	-
TRINITY_DN1266_c0_g1_i2	940.986	13.5682	1.57314	7.35356	1.93e-13	1.14786e-11	RYN52939.1	-	-	-	-	-	-	-	-	-	-
TRINITY_DN1266_c0_g2_i3	68.6314	9.79137	2.14055	3.63989	0.000272752	0.00184546	KNG49232.1	-	-	-	-	-	-	-	-	-	-
TRINITY_DN12660_c0_g1_i5	139.721	10.8165	1.69288	5.20801	1.90872e-07	2.10718e-06	XP_018380947.1	-	-	-	-	-	-	-	-	-	-
TRINITY_DN1267_c0_g1_i1	202.16	8.82772	1.5514	4.401	1.07754e-05	8.91136e-05	KNG51015.1	-	-	-	-	-	-	-	-	XP_010558920.1	C2H2
TRINITY_DN12681_c0_g1_i1	138.874	10.8081	1.82782	4.81891	1.44347e-06	1.37654e-05	RAR02122.1	-	-	-	-	-	-	-	-	-	-
TRINITY_DN126832_c0_g1_i1	52.07	9.39293	2.01216	3.67413	0.000238665	0.00163076	KNG49811.1	-	-	-	-	-	-	-	-	-	-
TRINITY_DN12689_c0_g1_i1	228.081	11.5237	1.69558	5.61679	1.94542e-08	2.64486e-07	RYN99412.1	-	-	-	-	-	-	-	-	-	-
TRINITY_DN126896_c0_g2_i1	155.205	10.9684	1.75148	5.12047	3.0478e-07	3.24671e-06	RYO39845.1	-	-	-	-	-	-	-	-	Aan015255	MYB
TRINITY_DN12694_c0_g1_i2	597.718	10.4425	1.21701	6.9371	4.00217e-12	1.52527e-10	-	-	-	-	-	-	-	-	-	-	-
TRINITY_DN12704_c0_g1_i4	580.573	12.8714	1.62987	6.67007	2.55681e-11	7.43059e-10	-	-	-	-	-	-	-	-	-	-	-
TRINITY_DN12704_c0_g2_i6	90.7425	10.1939	1.77482	4.61679	3.89729e-06	3.45737e-05	-	-	-	-	-	-	-	-	-	-	-
TRINITY_DN12710_c0_g1_i1	896.408	13.4982	1.58473	7.25562	3.9983e-13	2.16456e-11	OWY52672.1	-	-	-	-	-	-	-	-	-	-
TRINITY_DN12719_c0_g1_i2	556.804	10.4105	1.23795	6.79387	1.09165e-11	3.60133e-10	XP_018383776.1	-	-	-	-	-	-	-	-	-	-
TRINITY_DN12727_c0_g1_i2	151.154	8.39702	1.64395	3.89126	9.97238e-05	0.000722677	KNG46653.1	-	-	-	-	-	-	-	-	-	-
TRINITY_DN12727_c0_g2_i1	1343.97	14.0825	1.58235	7.63579	2.24448e-14	1.82616e-12	OWY52719.1	-	-	-	-	-	-	-	-	-	-
TRINITY_DN127299_c0_g1_i1	268.257	11.7578	1.71289	5.69668	1.22163e-08	1.72932e-07	KAB2106392.1	-	-	-	-	-	-	-	-	-	-
TRINITY_DN12732_c0_g1_i2	64.4589	9.7009	2.12024	3.63208	0.000281144	0.00189889	KNG44381.1	-	-	-	-	-	-	-	-	ONIVA04G19030.1	MYB
TRINITY_DN12732_c0_g2_i1	616.846	12.9589	1.58185	6.92788	4.27192e-12	1.60776e-10	XP_018380245.1	-	-	-	-	-	-	-	-	-	-
TRINITY_DN12735_c0_g1_i1	1836.61	6.50275	1.34309	3.35254	0.000800744	0.00502049	AGI98130.1	9-cis-epoxycarotenoid dioxygenase	-	Narcissus tazetta (Cream narcissus)	metal ion binding [GO:0046872]; oxidoreductase activity, acting on single donors with incorporation of molecular oxygen, incorporation of two atoms of oxygen [GO:0016702]	-	-	-	-	-	-
TRINITY_DN12735_c0_g2_i1	512.892	4.63527	0.828239	3.18177	0.00146378	0.00872915	AGT28471.1	9-cis-epoxycarotenoid dioxygenase	-	Narcissus tazetta (Cream narcissus)	metal ion binding [GO:0046872]; oxidoreductase activity, acting on single donors with incorporation of molecular oxygen, incorporation of two atoms of oxygen [GO:0016702]	-	-	-	-	-	-
TRINITY_DN127377_c0_g1_i1	46.5924	9.2324	1.98984	3.63465	0.000278355	0.00188095	XP_018385872.1	-	-	-	-	-	-	-	-	-	-
TRINITY_DN12742_c0_g1_i5	1174.54	11.4812	1.18649	7.99096	1.33887e-15	1.5532e-13	XP_018387678.1	-	-	-	-	-	-	-	-	-	-
TRINITY_DN127437_c0_g2_i1	667.621	9.63501	0.927491	8.23189	1.84283e-16	2.58528e-14	XP_018390817.1	-	-	-	-	-	-	-	-	-	-
TRINITY_DN12744_c0_g1_i1	425.319	10.0257	1.27159	6.31155	2.76246e-10	5.93944e-09	XP_018383803.1	-	-	-	-	-	-	-	-	-	-
TRINITY_DN1275_c1_g1_i2	8454	10.7451	0.737954	11.8505	2.14022e-32	2.82422e-29	XP_020250456.1	-	-	-	-	-	-	-	-	-	-
TRINITY_DN12752_c0_g1_i1	61.3971	9.63062	2.37385	3.21445	0.00130695	0.00787281	XP_007715587.1	-	-	-	-	-	-	-	-	-	-
TRINITY_DN12766_c0_g1_i1	201.055	11.3415	1.66561	5.60845	2.04152e-08	2.75863e-07	-	-	-	-	-	-	-	-	-	-	-
TRINITY_DN12786_c0_g1_i1	64.4324	9.70001	1.868	4.12207	3.75484e-05	0.000289493	XP_018380675.1	-	-	-	-	-	-	-	-	-	-
TRINITY_DN12787_c0_g1_i1	40.4096	9.02721	2.62485	2.67719	0.00742427	0.0385852	KNG50854.1	-	-	-	-	-	-	-	-	-	-
TRINITY_DN12787_c0_g2_i1	41.9784	9.08211	2.68249	2.64013	0.00828738	0.0427447	XP_018386227.1	-	-	-	-	-	-	-	-	-	-
TRINITY_DN12787_c0_g3_i1	106.309	10.4225	2.18609	3.85278	0.000116783	0.000837108	KNG50854.1	-	-	-	-	-	-	-	-	-	-
TRINITY_DN12792_c0_g1_i3	1391.27	11.6695	1.17618	8.22112	2.01615e-16	2.78222e-14	RYN63227.1	-	-	-	-	-	-	-	-	-	-
TRINITY_DN12792_c0_g2_i2	190.918	11.2672	1.98215	4.67531	2.93507e-06	2.6585e-05	KNG50362.1	-	-	-	-	-	-	-	-	-	-
TRINITY_DN127928_c0_g1_i1	229.887	11.535	1.65021	5.77807	7.55632e-09	1.12155e-07	RYO06303.1	-	-	-	-	-	-	-	-	-	-
TRINITY_DN12799_c0_g1_i1	81.6068	10.0412	2.0427	3.93653	8.26676e-05	0.000605202	KNG47396.1	-	-	-	-	-	-	-	-	DCAR_026406	MYB_related
TRINITY_DN12799_c0_g2_i1	996.123	9.07648	1.11093	6.36985	1.89217e-10	4.24325e-09	XP_028505282.1	-	-	-	-	-	-	-	-	DCAR_026406	MYB_related
TRINITY_DN12815_c0_g1_i2	309.032	6.58735	0.92062	4.98289	6.26419e-07	6.3176e-06	XP_010937114.2	sphinganine C4-monooxygenase 2	LOC105056572	Elaeis guineensis var. tenera (Oil palm)	iron ion binding [GO:0005506]; monooxygenase activity [GO:0004497]	integral component of membrane [GO:0016021]	lipid biosynthetic process [GO:0008610]	-	-	-	-
TRINITY_DN128197_c0_g1_i3	138.848	10.8077	1.72698	5.10006	3.3955e-07	3.58455e-06	KAB2104276.1	-	-	-	-	-	-	-	-	-	-
TRINITY_DN128202_c0_g1_i1	25.1994	8.3448	2.43104	2.60992	0.0090564	0.0463545	-	-	-	-	-	-	-	-	-	-	-
TRINITY_DN128324_c0_g1_i1	50.2145	9.34067	2.25381	3.257	0.00112597	0.00685895	KNG46302.1	-	-	-	-	-	-	-	-	-	-
TRINITY_DN12835_c0_g1_i1	38.9001	8.97239	2.23961	3.11322	0.00185059	0.0108384	XP_007694346.1	-	-	-	-	-	-	-	-	-	-
TRINITY_DN12837_c0_g1_i1	1053.02	8.12237	0.933872	6.5559	5.53083e-11	1.45152e-09	XP_020276514.1	-	-	-	-	-	-	-	-	Zpz_sc00083.1.g00290.1.am.mk	Dof
TRINITY_DN12844_c0_g1_i1	751.634	13.2441	1.59034	7.07024	1.54666e-12	6.81532e-11	XP_018381461.1	-	-	-	-	-	-	-	-	-	-
TRINITY_DN12848_c0_g1_i8	322.426	12.0231	1.64776	6.08287	1.18051e-09	2.14683e-08	XP_018384033.1	-	-	-	-	-	-	-	-	-	-
TRINITY_DN1285_c0_g3_i1	950.537	13.5827	1.56889	7.38275	1.55048e-13	9.60003e-12	XP_018383222.1	-	-	-	-	-	-	-	-	-	-
TRINITY_DN12855_c0_g1_i13	2425.12	12.4653	1.20892	8.65675	4.85418e-18	9.66875e-16	RYN87736.1	-	-	-	-	-	-	-	-	-	-
TRINITY_DN12860_c0_g1_i8	243.716	11.6191	1.63451	5.88504	3.97968e-09	6.30344e-08	XP_018386033.1	-	-	-	-	-	-	-	-	-	-
TRINITY_DN12862_c0_g1_i2	646.967	13.0277	1.57858	6.98581	2.8321e-12	1.13464e-10	RYN86896.1	-	-	-	-	-	-	-	-	-	-
TRINITY_DN12862_c0_g2_i1	67.7283	9.77227	2.10196	3.69762	0.000217627	0.00149865	KNG44675.1	-	-	-	-	-	-	-	-	Gh_A11G2240	MYB
TRINITY_DN12873_c0_g1_i21	493.894	3.90255	0.620382	3.06674	0.0021641	0.0125112	-	-	-	-	-	-	-	-	-	-	-
TRINITY_DN12888_c0_g1_i2	148.965	4.90777	0.985396	2.95086	0.0031689	0.017733	-	-	-	-	-	-	-	-	-	KZV44363.1	LBD
TRINITY_DN12896_c0_g1_i6	299.233	11.9153	1.61588	6.13616	8.45406e-10	1.58945e-08	RII12682.1	-	-	-	-	-	-	-	-	-	-
TRINITY_DN12898_c0_g1_i1	325.234	12.0356	1.62155	6.18888	6.05936e-10	1.18953e-08	XP_018391609.1	-	-	-	-	-	-	-	-	-	-
TRINITY_DN129_c2_g1_i7	550.171	12.794	1.65414	6.52544	6.78005e-11	1.73201e-09	XP_028504832.1	-	-	-	-	-	-	-	-	-	-
TRINITY_DN129_c4_g1_i2	268.25	11.7576	1.62299	6.01213	1.83107e-09	3.16757e-08	OWY43583.1	-	-	-	-	-	-	-	-	-	-
TRINITY_DN1290_c0_g1_i5	5466.96	7.88153	0.829254	7.09256	1.31651e-12	5.93299e-11	-	-	-	-	-	-	-	-	-	-	-
TRINITY_DN129012_c0_g1_i1	190.041	11.2605	1.68158	5.507	3.65006e-08	4.66357e-07	RII09903.1	-	-	-	-	-	-	-	-	-	-
TRINITY_DN12910_c0_g1_i1	100.943	10.3476	1.74874	4.77347	1.81079e-06	1.69959e-05	XP_018379561.1	-	-	-	-	-	-	-	-	-	-
TRINITY_DN12928_c0_g1_i2	560.591	12.8209	1.58591	6.82315	8.90679e-12	3.04294e-10	RYN45592.1	-	-	-	-	-	-	-	-	-	-
TRINITY_DN12931_c0_g1_i1	136.459	10.7828	1.96145	4.47769	7.54552e-06	6.38783e-05	XP_007696237.1	-	-	-	-	-	-	-	-	-	-
TRINITY_DN12931_c0_g2_i1	730.327	13.2026	1.57497	7.11287	1.13656e-12	5.26243e-11	XP_028512380.1	-	-	-	-	-	-	-	-	-	-
TRINITY_DN12933_c0_g1_i1	2143.22	14.7557	1.56892	8.13025	4.28407e-16	5.58343e-14	-	-	-	-	-	-	-	-	-	-	-
TRINITY_DN12933_c0_g2_i2	214.15	11.4328	2.04924	4.60307	4.16315e-06	3.67393e-05	-	-	-	-	-	-	-	-	-	-	-
TRINITY_DN12933_c3_g1_i1	327.817	12.0468	1.61027	6.23922	4.39747e-10	9.03611e-09	RYN43391.1	-	-	-	-	-	-	-	-	-	-
TRINITY_DN12934_c0_g1_i2	492.115	12.633	1.5879	6.69627	2.13811e-11	6.42606e-10	XP_018387770.1	-	-	-	-	-	-	-	-	-	-
TRINITY_DN12935_c0_g1_i1	989.391	13.6405	1.56535	7.43639	1.03473e-13	6.9026e-12	RYN76466.1	-	-	-	-	-	-	-	-	-	-
TRINITY_DN12939_c0_g1_i2	34.3618	8.79343	2.26762	2.99584	0.0027369	0.0155087	KNG46654.1	-	-	-	-	-	-	-	-	-	-
TRINITY_DN12945_c0_g1_i1	187.311	11.2392	1.92553	4.79824	1.60065e-06	1.5148e-05	XP_018382283.1	-	-	-	-	-	-	-	-	-	-
TRINITY_DN12953_c0_g1_i1	38.7716	8.96762	2.41013	2.89097	0.00384056	0.0211414	WP_130136268.1	-	-	-	-	-	-	-	-	mrna26696.1-v1.0-hybrid	bHLH
TRINITY_DN12960_c0_g1_i2	999.737	13.6556	1.57005	7.42369	1.13902e-13	7.46437e-12	XP_018389946.1	-	-	-	-	-	-	-	-	-	-
TRINITY_DN12962_c0_g1_i2	220.872	6.47682	1.17018	3.82574	0.000130379	0.000927791	KNG49953.1	-	-	-	-	-	-	-	-	-	-
TRINITY_DN12963_c0_g1_i1	49.2122	6.9583	1.8472	2.68423	0.00726976	0.0378614	XP_018382248.1	-	-	-	-	-	-	-	-	-	-
TRINITY_DN12964_c0_g1_i1	35.6669	8.84724	2.37432	2.88387	0.00392825	0.0215987	RAR07666.1	-	-	-	-	-	-	-	-	-	-
TRINITY_DN12968_c0_g1_i3	1770.1	14.4797	1.58989	7.84944	4.17903e-15	4.21604e-13	XP_020246731.1	-	-	-	-	-	-	-	-	-	-
TRINITY_DN129686_c0_g1_i1	779.253	13.2961	1.58042	7.14755	8.83403e-13	4.25353e-11	XP_018389332.1	-	-	-	-	-	-	-	-	-	-
TRINITY_DN12979_c0_g1_i1	1420.98	14.1628	1.56472	7.77318	7.65388e-15	7.15045e-13	-	-	-	-	-	-	-	-	-	-	-
TRINITY_DN12996_c0_g1_i1	87.5458	10.1425	2.03045	4.0102	6.06679e-05	0.000452779	XP_018389843.1	-	-	-	-	-	-	-	-	-	-
TRINITY_DN12996_c0_g2_i1	43.969	9.14906	2.14692	3.32992	0.000868704	0.00540964	EFQ94493.1	-	-	-	-	-	-	-	-	-	-
TRINITY_DN13001_c0_g1_i7	956.172	13.5912	1.59134	7.28394	3.24208e-13	1.80373e-11	-	-	-	-	-	-	-	-	-	-	-
TRINITY_DN13002_c0_g1_i1	574.324	12.8558	1.59874	6.79022	1.11964e-11	3.66684e-10	OWY46993.1	-	-	-	-	-	-	-	-	-	-
TRINITY_DN13002_c0_g2_i1	157.018	10.9852	1.99919	4.49441	6.97616e-06	5.9284e-05	RAR02589.1	-	-	-	-	-	-	-	-	-	-
TRINITY_DN130053_c1_g1_i1	77.0483	9.95744	2.33003	3.41517	0.000637417	0.00406037	NP_001296176.1	Chlorophyll a-b binding protein 7, chloroplastic (LHCI type II CAB-7)	CAB7	Solanum lycopersicum (Tomato) (Lycopersicon esculentum)	chlorophyll binding [GO:0016168]; metal ion binding [GO:0046872]	chloroplast thylakoid membrane [GO:0009535]; integral component of membrane [GO:0016021]; photosystem I [GO:0009522]; photosystem II [GO:0009523]	photosynthesis, light harvesting in photosystem I [GO:0009768]; protein-chromophore linkage [GO:0018298]; response to light stimulus [GO:0009416]	-	C	Bradi3g42627.5.p	ERF
TRINITY_DN13008_c0_g1_i2	271.41	9.28738	1.3047	5.58547	2.33069e-08	3.10761e-07	RYN32215.1	-	-	-	-	-	-	-	-	-	-
TRINITY_DN13017_c0_g1_i1	69.3427	7.43055	1.53322	3.54193	0.000397208	0.00261179	XP_007688792.1	-	-	-	-	-	-	-	-	-	-
TRINITY_DN13024_c0_g1_i1	86.3858	10.1232	2.16439	3.75313	0.000174643	0.00121834	-	-	-	-	-	-	-	-	-	-	-
TRINITY_DN13024_c0_g2_i1	710.467	13.1628	1.60075	6.97348	3.09198e-12	1.22138e-10	RYN50406.1	-	-	-	-	-	-	-	-	-	-
TRINITY_DN13025_c0_g1_i1	125.543	10.6625	1.92589	4.49793	6.86198e-06	5.8396e-05	RYN47790.1	-	-	-	-	-	-	-	-	-	-
TRINITY_DN13028_c0_g2_i1	49.252	9.3122	1.94911	3.75157	0.000175732	0.00122514	-	-	-	-	-	-	-	-	-	-	-
TRINITY_DN13030_c0_g2_i2	56.048	9.49921	2.10158	3.56837	0.000359203	0.00237818	KNG50373.1	-	-	-	-	-	-	-	-	-	-
TRINITY_DN130346_c1_g1_i1	27.8823	8.49167	2.23628	2.90289	0.00369734	0.0204193	XP_027067576.1	senescence-specific cysteine protease SAG39-like	LOC113693205	Coffea arabica (Arabian coffee)	cysteine-type peptidase activity [GO:0008234]	-	-	-	-	FANhyb_rscf00000253.1.g00010.1	BBR-BPC
TRINITY_DN13037_c0_g1_i1	121.713	10.6178	1.99622	4.31705	1.58129e-05	0.000127644	RAR12447.1	-	-	-	-	-	-	-	-	-	-
TRINITY_DN13037_c0_g2_i1	857.044	10.9501	1.29081	6.93371	4.09949e-12	1.55255e-10	XP_028502586.1	-	-	-	-	-	-	-	-	-	-
TRINITY_DN13053_c0_g1_i4	231.195	7.996	1.25396	4.78167	1.73847e-06	1.6357e-05	RDX86761.1	SKP1-like protein 1A (Fragment)	SKP1A CR513_31868	Mucuna pruriens (Velvet bean) (Dolichos pruriens)	-	-	protein ubiquitination [GO:0016567]; ubiquitin-dependent protein catabolic process [GO:0006511]	PATHWAY: Protein modification; protein ubiquitination. {ECO:0000256|ARBA:ARBA00004906}.	-	-	-
TRINITY_DN13064_c0_g1_i2	1860.46	12.0845	1.19921	8.40931	4.12423e-17	6.59584e-15	XP_009350631.1	-	-	-	-	-	-	-	-	-	-
TRINITY_DN13085_c0_g1_i4	813.942	13.359	1.63737	6.93736	3.99494e-12	1.52389e-10	XP_018389037.1	-	-	-	-	-	-	-	-	-	-
TRINITY_DN13087_c0_g2_i1	635.181	9.48369	1.07751	6.94533	3.77568e-12	1.4481e-10	KNG45751.1	-	-	-	-	-	-	-	-	-	-
TRINITY_DN13094_c0_g2_i1	275.062	11.7939	1.65612	5.91376	3.34389e-09	5.40384e-08	EFQ89182.1	-	-	-	-	-	-	-	-	-	-
TRINITY_DN13102_c0_g1_i2	168.645	11.0881	1.67128	5.43777	5.39528e-08	6.6383e-07	-	-	-	-	-	-	-	-	-	-	-
TRINITY_DN13106_c0_g1_i1	70.6282	7.47177	1.69873	3.22109	0.00127703	0.00770799	KNG45985.1	-	-	-	-	-	-	-	-	-	-
TRINITY_DN13133_c0_g1_i1	916.832	13.5307	1.57885	7.30324	2.80913e-13	1.60082e-11	XP_028511890.1	-	-	-	-	-	-	-	-	-	-
TRINITY_DN13139_c0_g1_i2	111.335	6.89807	1.68757	2.90244	0.00370272	0.0204385	AAH66955.2	-	-	-	-	-	-	-	-	Aan020124	MYB
TRINITY_DN13142_c0_g2_i1	59.5415	9.58635	1.96442	3.86188	0.000112518	0.000808045	RAR14318.1	-	-	-	-	-	-	-	-	-	-
TRINITY_DN131618_c0_g2_i1	204.829	11.3685	1.65032	5.67679	1.37249e-08	1.91908e-07	RII24425.1	-	-	-	-	-	-	-	-	-	-
TRINITY_DN13164_c0_g1_i5	2141.4	6.0248	0.999165	4.02817	5.62138e-05	0.000421474	-	-	-	-	-	-	-	-	-	-	-
TRINITY_DN131666_c0_g1_i1	181.359	11.1926	2.12059	4.33494	1.45802e-05	0.000118218	QDB74996.1	-	-	-	-	-	-	-	-	-	-
TRINITY_DN13167_c0_g1_i2	574.793	12.8571	1.59294	6.81575	9.37761e-12	3.17808e-10	OWY43356.1	-	-	-	-	-	-	-	-	-	-
TRINITY_DN13167_c0_g2_i1	157.462	10.9893	1.84481	4.87273	1.10064e-06	1.07122e-05	KNG49862.1	-	-	-	-	-	-	-	-	-	-
TRINITY_DN13173_c0_g1_i7	349.724	12.1403	1.60644	6.31226	2.74992e-10	5.91849e-09	RYO68591.1	-	-	-	-	-	-	-	-	-	-
TRINITY_DN13184_c0_g1_i2	304.273	11.9395	1.64111	6.05656	1.39065e-09	2.47568e-08	RII07802.1	-	-	-	-	-	-	-	-	-	-
TRINITY_DN13186_c0_g1_i4	81.9563	23.462	3.03898	7.06224	1.63844e-12	7.09805e-11	RAR10910.1	-	-	-	-	-	-	-	-	-	-
TRINITY_DN13186_c0_g2_i2	222.185	11.486	1.7151	5.53086	3.18662e-08	4.12385e-07	XP_028503465.1	-	-	-	-	-	-	-	-	Sopen10g033340.1	MYB
TRINITY_DN13187_c0_g1_i2	91.4738	22.8671	3.0251	6.89797	5.27495e-12	1.9302e-10	XP_015142058.1	-	-	-	-	-	-	-	-	-	-
TRINITY_DN13200_c0_g1_i2	277.748	11.8078	1.61946	6.05622	1.39357e-09	2.47982e-08	XP_028506496.1	-	-	-	-	-	-	-	-	-	-
TRINITY_DN132089_c0_g1_i1	51.1373	9.36688	2.0333	3.62312	0.000291071	0.00195811	KNG47759.1	-	-	-	-	-	-	-	-	-	-
TRINITY_DN13213_c0_g1_i1	152.561	6.62138	1.18719	3.89271	9.91309e-05	0.000718503	RAR05379.1	-	-	-	-	-	-	-	-	-	-
TRINITY_DN13213_c1_g1_i1	654.317	10.5704	1.23226	6.95506	3.52411e-12	1.36525e-10	XP_018386087.1	-	-	-	-	-	-	-	-	-	-
TRINITY_DN13221_c0_g2_i1	75.1405	9.92205	2.18101	3.63229	0.000280922	0.0018977	KNG48471.1	-	-	-	-	-	-	-	-	-	-
TRINITY_DN132215_c0_g2_i1	27.6812	8.48118	2.23292	2.90255	0.00370134	0.0204336	-	-	-	-	-	-	-	-	-	-	-
TRINITY_DN13229_c0_g1_i1	88.7026	10.1614	1.91383	4.26445	2.00396e-05	0.000160055	KNG45952.1	-	-	-	-	-	-	-	-	RrC1188_p3	C3H
TRINITY_DN13229_c0_g2_i1	46.8759	9.24144	2.21784	3.26508	0.00109431	0.00668445	RMZ71900.1	-	-	-	-	-	-	-	-	-	-
TRINITY_DN13229_c1_g1_i2	320.767	12.0155	1.61806	6.1898	6.02406e-10	1.18425e-08	XP_018384779.1	-	-	-	-	-	-	-	-	-	-
TRINITY_DN13232_c0_g2_i1	210.23	11.4057	1.81185	5.19123	2.08908e-07	2.28834e-06	-	-	-	-	-	-	-	-	-	-	-
TRINITY_DN13235_c0_g1_i8	388.014	12.29	1.63762	6.28351	3.31004e-10	7.02729e-09	XP_014076980.1	-	-	-	-	-	-	-	-	-	-
TRINITY_DN13240_c2_g1_i1	33.8014	8.7686	2.22801	3.03796	0.00238183	0.0136562	-	-	-	-	-	-	-	-	-	-	-
TRINITY_DN13257_c0_g1_i4	1945.28	5.20597	0.528206	6.06955	1.2827e-09	2.30488e-08	-	-	-	-	-	-	-	-	-	-	-
TRINITY_DN13258_c0_g1_i3	631.895	10.5256	1.20164	7.09496	1.2939e-12	5.8687e-11	RYN26526.1	-	-	-	-	-	-	-	-	-	-
TRINITY_DN13259_c0_g1_i3	96.899	10.2884	1.76157	4.70516	2.53672e-06	2.31779e-05	XP_007695142.1	-	-	-	-	-	-	-	-	-	-
TRINITY_DN13260_c0_g1_i3	195.416	11.3006	1.65125	5.63244	1.77679e-08	2.43441e-07	RII05375.1	-	-	-	-	-	-	-	-	-	-
TRINITY_DN13268_c0_g2_i1	139.645	10.8159	1.71908	5.1283	2.92378e-07	3.12405e-06	RYN19150.1	-	-	-	-	-	-	-	-	-	-
TRINITY_DN13268_c1_g1_i4	348.923	9.05166	1.13316	6.22301	4.877e-10	9.87728e-09	XP_028501417.1	-	-	-	-	-	-	-	-	-	-
TRINITY_DN13277_c0_g1_i1	63.714	9.68409	1.97144	3.89771	9.71052e-05	0.000704184	KNG47949.1	-	-	-	-	-	-	-	-	-	-
TRINITY_DN132788_c0_g1_i2	183.344	11.2086	1.65805	5.55384	2.7946e-08	3.66938e-07	RYN54845.1	-	-	-	-	-	-	-	-	-	-
TRINITY_DN132858_c0_g1_i1	86.1516	10.1192	1.81997	4.46116	8.15157e-06	6.86784e-05	OWY57707.1	-	-	-	-	-	-	-	-	-	-
TRINITY_DN13287_c0_g2_i1	138.198	10.8008	1.69901	5.17996	2.2193e-07	2.41849e-06	RII12987.1	-	-	-	-	-	-	-	-	-	-
TRINITY_DN13290_c0_g1_i1	1379.9	14.1203	3.59063	3.37553	0.000736732	0.00464536	-	-	-	-	-	-	-	-	-	-	-
TRINITY_DN132981_c1_g1_i1	61981.2	7.09489	0.957447	5.32133	1.03011e-07	1.20161e-06	XP_026423415.1	-	-	-	-	-	-	-	-	-	-
TRINITY_DN132981_c2_g1_i1	1451.4	5.1202	0.887539	3.51556	0.000438831	0.00286805	GAU19500.1	Uncharacterized protein	TSUD_77440	Trifolium subterraneum (Subterranean clover)	-	-	-	-	-	-	-
TRINITY_DN13302_c0_g1_i2	3395.73	15.4196	1.55439	8.63336	5.95741e-18	1.14347e-15	RYN90199.1	-	-	-	-	-	-	-	-	-	-
TRINITY_DN13304_c0_g1_i1	1573.83	14.31	3.4574	3.56048	0.000370173	0.00244851	KNG48783.1	-	-	-	-	-	-	-	-	-	-
TRINITY_DN13311_c0_g1_i5	363.511	9.71756	1.25593	6.1449	8.00131e-10	1.51105e-08	-	-	-	-	-	-	-	-	-	-	-
TRINITY_DN13314_c0_g1_i3	151.955	10.9378	1.71358	5.2159	1.82931e-07	2.0264e-06	RYN44351.1	-	-	-	-	-	-	-	-	-	-
TRINITY_DN1332_c1_g1_i1	78.8907	9.99149	2.08075	3.84068	0.000122693	0.000876199	-	-	-	-	-	-	-	-	-	-	-
TRINITY_DN13321_c0_g1_i1	40.1756	9.01886	2.57536	2.72539	0.00642262	0.0338756	XP_007700417.1	-	-	-	-	-	-	-	-	676753378	B3
TRINITY_DN13323_c1_g1_i2	345.133	9.72235	1.25965	6.13053	8.7588e-10	1.64162e-08	KAB2102523.1	-	-	-	-	-	-	-	-	-	-
TRINITY_DN13330_c0_g1_i1	44.3511	7.74075	1.96654	2.91921	0.00350914	0.0194667	NP_001289617.1	-	-	-	-	-	-	-	-	-	-
TRINITY_DN13338_c0_g1_i1	322.399	12.0229	1.62242	6.17779	6.5007e-10	1.26151e-08	XP_018381422.1	-	-	-	-	-	-	-	-	-	-
TRINITY_DN13349_c0_g2_i1	92.8784	10.2278	1.9556	4.20729	2.58449e-05	0.000203459	XP_007684326.1	-	-	-	-	-	-	-	-	-	-
TRINITY_DN13362_c0_g4_i1	254.015	11.679	1.62906	5.94143	2.82551e-09	4.65701e-08	XP_018388821.1	-	-	-	-	-	-	-	-	-	-
TRINITY_DN13380_c0_g1_i1	2114.21	4.79927	0.686505	4.07757	4.5509e-05	0.000346753	-	-	-	-	-	-	-	-	-	-	-
TRINITY_DN13381_c0_g1_i1	47.0473	9.24667	2.37232	3.05467	0.00225305	0.0129901	-	-	-	-	-	-	-	-	-	-	-
TRINITY_DN13390_c0_g1_i1	273.141	8.24178	1.22209	5.10745	3.26527e-07	3.46091e-06	XP_018387805.1	-	-	-	-	-	-	-	-	-	-
TRINITY_DN1340_c1_g3_i1	50.5703	7.87483	1.8578	3.16225	0.00156553	0.00928741	-	-	-	-	-	-	-	-	-	-	-
TRINITY_DN13400_c0_g1_i10	30.8947	8.64003	2.39525	2.77217	0.00556837	0.0296963	-	-	-	-	-	-	-	-	-	-	-
TRINITY_DN13403_c0_g1_i2	246.847	11.6377	1.63219	5.90476	3.53169e-09	5.67261e-08	RYN16192.1	-	-	-	-	-	-	-	-	-	-
TRINITY_DN13407_c0_g3_i1	371.308	12.2267	1.60559	6.3694	1.89764e-10	4.25102e-09	KNG46461.1	-	-	-	-	-	-	-	-	-	-
TRINITY_DN1341_c0_g1_i1	4716.33	15.8936	1.58174	8.78373	1.58145e-18	3.4601e-16	RYN30425.1	-	-	-	-	-	-	-	-	-	-
TRINITY_DN1341_c0_g2_i1	770.442	13.2797	1.9452	5.79874	6.68157e-09	1.00478e-07	XP_028503923.1	-	-	-	-	-	-	-	-	-	-
TRINITY_DN13415_c0_g1_i1	75.8755	9.93608	2.20144	3.60496	0.000312204	0.00208896	OWY58061.1	-	-	-	-	-	-	-	-	-	-
TRINITY_DN13418_c0_g1_i2	1120.56	13.8202	1.56405	7.55742	4.11146e-14	3.09473e-12	XP_018383125.1	-	-	-	-	-	-	-	-	-	-
TRINITY_DN13418_c0_g2_i2	145.334	8.51057	1.6255	4.00528	6.19451e-05	0.000461888	KNG47143.1	-	-	-	-	-	-	-	-	-	-
TRINITY_DN13422_c0_g1_i1	291.056	11.8752	1.62609	6.07297	1.25564e-09	2.26396e-08	KAB2099460.1	-	-	-	-	-	-	-	-	-	-
TRINITY_DN13436_c0_g1_i7	651.182	13.037	1.59325	6.92735	4.28803e-12	1.61238e-10	RYN54919.1	-	-	-	-	-	-	-	-	-	-
TRINITY_DN1344_c1_g1_i3	206.157	11.3779	1.6858	5.5629	2.65325e-08	3.50341e-07	OWY41503.1	-	-	-	-	-	-	-	-	-	-
TRINITY_DN13448_c0_g1_i3	92.3345	10.2193	1.87362	4.38685	1.15005e-05	9.45915e-05	KAB2099425.1	-	-	-	-	-	-	-	-	-	-
TRINITY_DN13464_c0_g1_i1	81.765	10.0439	1.94293	4.14011	3.47138e-05	0.000268866	XP_007685847.1	-	-	-	-	-	-	-	-	-	-
TRINITY_DN134693_c0_g1_i1	86.1516	10.1192	1.81997	4.46116	8.15157e-06	6.86784e-05	XP_018389365.1	-	-	-	-	-	-	-	-	-	-
TRINITY_DN13475_c0_g2_i3	1107.88	3.443	0.537837	2.68296	0.0072973	0.0379908	-	-	-	-	-	-	-	-	-	-	-
TRINITY_DN134973_c0_g2_i1	134.735	10.7644	2.09235	4.18876	2.80482e-05	0.00021982	KNG49318.1	-	-	-	-	-	-	-	-	-	-
TRINITY_DN13515_c0_g1_i1	1770.63	14.4802	1.59564	7.82143	5.22285e-15	5.11706e-13	RYN49236.1	-	-	-	-	-	-	-	-	-	-
TRINITY_DN1352_c0_g1_i1	506.998	10.2032	1.22553	6.69361	2.17729e-11	6.5107e-10	RMZ66098.1	-	-	-	-	-	-	-	-	-	-
TRINITY_DN1352_c2_g1_i2	145.511	10.8748	1.7908	4.95578	7.2039e-07	7.20169e-06	XP_018390369.1	-	-	-	-	-	-	-	-	-	-
TRINITY_DN13520_c0_g1_i1	29.2566	8.56139	2.32212	2.8256	0.00471919	0.025532	KNG44273.1	-	-	-	-	-	-	-	-	-	-
TRINITY_DN13520_c0_g2_i1	480.788	12.5995	1.62709	6.51438	7.2992e-11	1.8523e-09	OWY42088.1	-	-	-	-	-	-	-	-	-	-
TRINITY_DN13521_c0_g1_i1	687.855	13.1162	1.64043	6.7764	1.23204e-11	3.98052e-10	OWY57923.1	-	-	-	-	-	-	-	-	-	-
TRINITY_DN13521_c0_g2_i1	143.448	6.38734	1.52682	2.87352	0.00405928	0.0222381	KNG49688.1	-	-	-	-	-	-	-	-	-	-
TRINITY_DN135224_c0_g1_i1	158.998	11.0032	1.72144	5.23004	1.69475e-07	1.88724e-06	XP_018383352.1	-	-	-	-	-	-	-	-	-	-
TRINITY_DN13526_c0_g1_i4	1247.46	13.9749	1.62039	7.39011	1.46706e-13	9.21868e-12	XP_018391644.1	-	-	-	-	-	-	-	-	-	-
TRINITY_DN13526_c0_g3_i1	65.2697	9.7188	2.48288	3.10881	0.00187844	0.0109878	KNG45460.1	-	-	-	-	-	-	-	-	-	-
TRINITY_DN13526_c0_g5_i1	389.679	12.2964	1.65063	6.23789	4.43526e-10	9.09606e-09	XP_028505767.1	-	-	-	-	-	-	-	-	-	-
TRINITY_DN13526_c0_g6_i1	28.6864	8.53288	2.26829	2.88009	0.00397567	0.0218367	KNG45343.1	-	-	-	-	-	-	-	-	-	-
TRINITY_DN13526_c4_g1_i1	190.526	11.2642	2.06073	4.49558	6.93801e-06	5.89836e-05	XP_008027739.1	-	-	-	-	-	-	-	-	-	-
TRINITY_DN13530_c2_g1_i1	91.0229	10.1986	2.13632	3.83774	0.000124172	0.000886164	RAR08079.1	-	-	-	-	-	-	-	-	-	-
TRINITY_DN13535_c0_g1_i1	119.838	10.595	1.72529	4.98175	6.30115e-07	6.34881e-06	-	-	-	-	-	-	-	-	-	-	-
TRINITY_DN13552_c0_g1_i1	80.2093	7.48258	1.61005	3.40523	0.000661096	0.00419854	KNG45537.1	-	-	-	-	-	-	-	-	-	-
TRINITY_DN13552_c1_g1_i1	1028.33	13.6962	1.57217	7.43953	1.01043e-13	6.75114e-12	XP_028505722.1	-	-	-	-	-	-	-	-	-	-
TRINITY_DN13557_c0_g1_i2	581.892	12.8747	1.58043	6.88088	5.94835e-12	2.14318e-10	XP_018381557.1	-	-	-	-	-	-	-	-	-	-
TRINITY_DN13558_c0_g1_i1	121.446	10.6146	1.99615	4.31562	1.59153e-05	0.000128427	RAR07040.1	-	-	-	-	-	-	-	-	-	-
TRINITY_DN13558_c0_g2_i1	72.7543	9.87549	1.93744	4.0649	4.8053e-05	0.000364755	-	-	-	-	-	-	-	-	-	-	-
TRINITY_DN13558_c1_g1_i1	182.899	11.205	1.66023	5.54442	2.94935e-08	3.85341e-07	XP_028511724.1	-	-	-	-	-	-	-	-	-	-
TRINITY_DN13560_c0_g1_i1	87.4101	6.041	1.39984	2.88675	0.00389244	0.0214102	RAR06734.1	-	-	-	-	-	-	-	-	-	-
TRINITY_DN13561_c0_g1_i1	1034.16	13.7044	1.60585	7.28864	3.13109e-13	1.75121e-11	RYN71607.1	-	-	-	-	-	-	-	-	-	-
TRINITY_DN13561_c0_g2_i2	52.3106	9.39966	2.10861	3.50926	0.00044936	0.00293369	KNG46685.1	-	-	-	-	-	-	-	-	-	-
TRINITY_DN13576_c0_g2_i1	866.881	13.4498	1.56969	7.29434	3.00131e-13	1.6966e-11	KAB2103675.1	-	-	-	-	-	-	-	-	-	-
TRINITY_DN13579_c0_g1_i1	250.123	11.6566	1.62998	5.92437	3.13492e-09	5.10916e-08	OWY52630.1	-	-	-	-	-	-	-	-	-	-
TRINITY_DN13582_c0_g2_i1	69.6233	9.81207	1.99895	3.90808	9.30327e-05	0.000676859	-	-	-	-	-	-	-	-	-	-	-
TRINITY_DN13582_c2_g1_i1	53.0522	9.41995	2.2865	3.24511	0.00117404	0.00713429	AVD96821.1	-	-	-	-	-	-	-	-	-	-
TRINITY_DN13589_c1_g1_i1	665.133	13.0677	1.57811	7.01323	2.32885e-12	9.59418e-11	XP_018386785.1	-	-	-	-	-	-	-	-	-	-
TRINITY_DN13595_c0_g1_i3	771.02	13.2808	1.57141	7.17878	7.03369e-13	3.51493e-11	RYO61659.1	-	-	-	-	-	-	-	-	-	-
TRINITY_DN13597_c0_g1_i1	31.7581	8.67973	2.26859	2.94445	0.00323533	0.0180664	EFQ88431.1	-	-	-	-	-	-	-	-	-	-
TRINITY_DN13597_c0_g3_i1	551.452	12.7972	1.58725	6.80247	1.02843e-11	3.42759e-10	XP_018379228.1	-	-	-	-	-	-	-	-	-	-
TRINITY_DN13597_c0_g4_i1	26.9166	8.44091	2.27412	2.83227	0.0046219	0.0250602	EFQ88431.1	-	-	-	-	-	-	-	-	-	-
TRINITY_DN13597_c0_g5_i1	542.332	12.7732	1.58423	6.80025	1.04434e-11	3.47513e-10	XP_018379228.1	-	-	-	-	-	-	-	-	-	-
TRINITY_DN13600_c0_g1_i1	26.1783	8.4005	2.25545	2.83779	0.00454264	0.0246717	-	-	-	-	-	-	-	-	-	-	-
TRINITY_DN13622_c0_g1_i4	245.176	11.628	1.72659	5.57631	2.45674e-08	3.26332e-07	KAB2100255.1	-	-	-	-	-	-	-	-	-	-
TRINITY_DN13623_c0_g2_i2	918.67	10.0275	1.01751	7.88933	3.03807e-15	3.15205e-13	XP_018381883.1	-	-	-	-	-	-	-	-	-	-
TRINITY_DN13624_c0_g1_i1	14326.2	6.38675	0.819989	5.34977	8.80671e-08	1.04255e-06	XP_020249172.1	-	-	-	-	-	-	-	-	-	-
TRINITY_DN13629_c0_g1_i1	49.3378	9.31522	2.07031	3.5334	0.000410247	0.00269208	KNG52125.1	-	-	-	-	-	-	-	-	-	-
TRINITY_DN13629_c0_g2_i1	309.993	11.9661	1.65685	6.01506	1.79815e-09	3.12086e-08	XP_028511516.1	-	-	-	-	-	-	-	-	-	-
TRINITY_DN13632_c0_g1_i1	152.614	10.9441	2.01419	4.44057	8.97219e-06	7.49938e-05	KNG49918.1	-	-	-	-	-	-	-	-	-	-
TRINITY_DN13641_c0_g1_i1	455.878	12.5226	1.59025	6.61698	3.66613e-11	1.01657e-09	RMZ66084.1	-	-	-	-	-	-	-	-	-	-
TRINITY_DN136439_c0_g1_i1	54.1265	9.44854	1.92153	3.87636	0.00010603	0.000765097	XP_028504619.1	-	-	-	-	-	-	-	-	-	-
TRINITY_DN13647_c1_g1_i5	80.3446	10.0187	2.14068	3.74584	0.000179792	0.00125137	-	-	-	-	-	-	-	-	-	-	-
TRINITY_DN13650_c0_g2_i1	104.542	10.3984	1.84026	4.56369	5.02611e-06	4.38417e-05	XP_010933723.1	Pectinesterase (EC 3.1.1.11)	LOC105054042	Elaeis guineensis var. tenera (Oil palm)	aspartyl esterase activity [GO:0045330]; enzyme inhibitor activity [GO:0004857]; pectinesterase activity [GO:0030599]	-	cell wall modification [GO:0042545]; pectin catabolic process [GO:0045490]	PATHWAY: Glycan metabolism. {ECO:0000256|ARBA:ARBA00004881}.; PATHWAY: Glycan metabolism; pectin degradation; 2-dehydro-3-deoxy-D-gluconate from pectin: step 1/5. {ECO:0000256|ARBA:ARBA00005184, ECO:0000256|RuleBase:RU000589}.	-	MDP0000320566	NAC
TRINITY_DN13663_c0_g1_i1	796.578	13.3278	1.58079	7.16591	7.72714e-13	3.79853e-11	XP_018388679.1	-	-	-	-	-	-	-	-	-	-
TRINITY_DN13663_c0_g2_i1	140.262	10.8222	1.69338	5.2098	1.89048e-07	2.08923e-06	-	-	-	-	-	-	-	-	-	-	-
TRINITY_DN13667_c0_g1_i1	76.9728	7.42234	1.61432	3.35891	0.000782515	0.00491203	KNG51406.1	-	-	-	-	-	-	-	-	-	-
TRINITY_DN136729_c0_g2_i1	133.397	10.75	1.80068	4.85927	1.1782e-06	1.14163e-05	RYN87490.1	-	-	-	-	-	-	-	-	-	-
TRINITY_DN13695_c0_g1_i3	183.522	11.2102	1.72616	5.33565	9.52031e-08	1.11857e-06	OWY55912.1	-	-	-	-	-	-	-	-	-	-
TRINITY_DN13699_c0_g1_i1	267.94	11.7559	1.62215	6.01417	1.80809e-09	3.13425e-08	XP_018385499.1	-	-	-	-	-	-	-	-	-	-
TRINITY_DN13699_c0_g2_i1	39.7669	9.00418	2.2156	3.1613	0.00157068	0.00931535	XP_008025573.1	-	-	-	-	-	-	-	-	-	-
TRINITY_DN1370_c3_g1_i3	225.711	11.5086	1.64506	5.78008	7.46634e-09	1.10936e-07	XP_018382220.1	-	-	-	-	-	-	-	-	-	-
TRINITY_DN13700_c0_g1_i5	225.292	9.02108	1.28672	5.45658	4.85389e-08	6.03016e-07	RYN75708.1	-	-	-	-	-	-	-	-	-	-
TRINITY_DN13701_c0_g1_i1	692.231	13.1253	1.59093	6.99294	2.69184e-12	1.08462e-10	RAR10972.1	-	-	-	-	-	-	-	-	-	-
TRINITY_DN13708_c0_g2_i1	45.7751	9.20716	2.23222	3.2287	0.00124354	0.00752309	RAQ98567.1	-	-	-	-	-	-	-	-	-	-
TRINITY_DN13710_c0_g1_i1	46.5793	9.23226	2.33758	3.09391	0.00197535	0.0114942	KNG48677.1	-	-	-	-	-	-	-	-	-	-
TRINITY_DN13711_c0_g1_i40	745.794	13.2327	1.57557	7.12934	1.00849e-12	4.77952e-11	RYN44740.1	-	-	-	-	-	-	-	-	-	-
TRINITY_DN13713_c0_g2_i2	274.822	11.7926	1.64719	5.94504	2.76389e-09	4.57331e-08	-	-	-	-	-	-	-	-	-	-	-
TRINITY_DN13715_c0_g1_i1	669.532	26.1878	4.78484	5.0551	4.30175e-07	4.46643e-06	NP_001125.1	-	-	-	-	-	-	-	-	-	-
TRINITY_DN13718_c0_g1_i1	56.8589	9.51986	2.38498	3.15301	0.00161595	0.00956101	XP_028507218.1	-	-	-	-	-	-	-	-	-	-
TRINITY_DN1372_c0_g2_i1	64.3337	9.69801	2.36828	3.25047	0.00115216	0.0070104	KNG43907.1	-	-	-	-	-	-	-	-	-	-
TRINITY_DN13726_c0_g1_i3	25.7729	8.37762	2.28362	2.79277	0.00522591	0.0280293	-	-	-	-	-	-	-	-	-	-	-
TRINITY_DN13729_c0_g1_i3	139.227	10.8115	1.69394	5.20175	1.97419e-07	2.17491e-06	RII19205.1	-	-	-	-	-	-	-	-	-	-
TRINITY_DN13730_c0_g2_i1	421.444	12.4093	1.59408	6.52998	6.57765e-11	1.68741e-09	XP_028508618.1	-	-	-	-	-	-	-	-	-	-
TRINITY_DN13735_c0_g1_i2	164.917	7.60618	1.23669	4.5332	5.80969e-06	5.00256e-05	KNG51364.1	-	-	-	-	-	-	-	-	-	-
TRINITY_DN13740_c0_g1_i1	460.411	4.11004	0.750007	2.81336	0.00490272	0.0264403	-	-	-	-	-	-	-	-	-	-	-
TRINITY_DN13750_c0_g1_i1	55.0494	9.47328	2.15024	3.47555	0.000509808	0.00329421	XP_028505712.1	-	-	-	-	-	-	-	-	-	-
TRINITY_DN13750_c0_g2_i2	523.774	10.3196	1.21767	6.83237	8.35234e-12	2.89094e-10	XP_028505712.1	-	-	-	-	-	-	-	-	-	-
TRINITY_DN13751_c0_g1_i2	299.124	11.9148	1.61418	6.1423	8.13348e-10	1.53464e-08	-	-	-	-	-	-	-	-	-	-	-
TRINITY_DN13752_c0_g2_i4	34.2992	8.79083	2.40086	2.8285	0.00467662	0.0253212	XP_017823929.1	-	-	-	-	-	-	-	-	PEQU_11640	NAC
TRINITY_DN1376_c2_g2_i2	60.2929	7.06115	1.6766	3.0187	0.00253866	0.0144669	XP_014872560.1	-	-	-	-	-	-	-	-	Achn077281	MYB_related
TRINITY_DN13761_c0_g1_i4	71.2087	9.84444	2.40517	3.26149	0.00110827	0.0067609	RAR00478.1	-	-	-	-	-	-	-	-	-	-
TRINITY_DN13764_c0_g1_i3	348.703	12.136	1.60433	6.3179	2.65141e-10	5.73864e-09	XP_028503012.1	-	-	-	-	-	-	-	-	-	-
TRINITY_DN13775_c1_g1_i2	80.9409	10.0291	1.8073	4.44259	8.88806e-06	7.43495e-05	RII15216.1	-	-	-	-	-	-	-	-	-	-
TRINITY_DN13779_c0_g1_i1	55.59	9.48733	2.34676	3.19049	0.00142031	0.00849991	KNG48644.1	-	-	-	-	-	-	-	-	-	-
TRINITY_DN13780_c0_g1_i3	111.799	10.4951	1.76421	4.81526	1.4701e-06	1.40131e-05	TQB69642.1	-	-	-	-	-	-	-	-	-	-
TRINITY_DN13783_c0_g2_i1	95.1059	10.2612	1.87387	4.40865	1.04015e-05	8.62407e-05	KAE8716592.1	Mitotic spindle checkpoint protein MAD2-like	F3Y22_tig00110114pilonHSYRG00373	Hibiscus syriacus (Rose of Sharon)	-	integral component of membrane [GO:0016021]	-	-	-	-	-
TRINITY_DN13786_c0_g1_i4	472.65	12.5748	1.60568	6.58591	4.52113e-11	1.22302e-09	XP_018385218.1	-	-	-	-	-	-	-	-	-	-
TRINITY_DN13788_c0_g1_i4	15928.8	6.47343	0.57387	7.7952	6.43088e-15	6.15775e-13	XP_020250207.1	-	-	-	-	-	-	-	-	DCAR_007495	NF-YC
TRINITY_DN13791_c0_g1_i1	66.7123	5.73687	1.43882	2.59719	0.00939912	0.0479749	KNG49991.1	-	-	-	-	-	-	-	-	-	-
TRINITY_DN13809_c0_g1_i1	69.4652	9.80879	2.13132	3.66383	0.000248469	0.00169282	XP_028506167.1	-	-	-	-	-	-	-	-	-	-
TRINITY_DN13809_c0_g2_i1	330.028	12.0564	1.65557	6.07432	1.24518e-09	2.24797e-08	XP_028506167.1	-	-	-	-	-	-	-	-	-	-
TRINITY_DN13826_c0_g1_i2	726.612	13.1952	1.57372	7.11382	1.1287e-12	5.24311e-11	RYN40948.1	-	-	-	-	-	-	-	-	-	-
TRINITY_DN13829_c0_g1_i5	760.497	11.8142	1.5328	6.40282	1.52529e-10	3.50235e-09	KAB2103741.1	-	-	-	-	-	-	-	-	-	-
TRINITY_DN13829_c0_g2_i1	209.144	11.3987	2.03955	4.6082	4.06175e-06	3.58969e-05	XP_014550639.1	-	-	-	-	-	-	-	-	-	-
TRINITY_DN13831_c0_g1_i1	117.448	10.5663	2.07761	4.12315	3.73722e-05	0.000288187	KNG52163.1	-	-	-	-	-	-	-	-	-	-
TRINITY_DN13831_c0_g2_i1	2318.18	11.4305	0.995698	9.47123	2.76568e-21	9.65175e-19	-	-	-	-	-	-	-	-	-	-	-
TRINITY_DN1384_c0_g1_i9	1322.48	14.0592	1.56421	7.70945	1.26358e-14	1.11161e-12	XP_028510933.1	-	-	-	-	-	-	-	-	-	-
TRINITY_DN13845_c0_g1_i1	1157.14	13.8665	1.56981	7.55918	4.05603e-14	3.05847e-12	-	-	-	-	-	-	-	-	-	-	-
TRINITY_DN13845_c0_g2_i1	160.837	7.89697	1.36457	4.32148	1.54985e-05	0.000125279	-	-	-	-	-	-	-	-	-	-	-
TRINITY_DN13863_c1_g1_i1	101.39	7.99534	1.70532	3.51567	0.000438643	0.00286727	-	-	-	-	-	-	-	-	-	-	-
TRINITY_DN13878_c0_g1_i1	113.858	6.40185	1.56264	2.81693	0.00484846	0.026171	-	-	-	-	-	-	-	-	-	-	-
TRINITY_DN13886_c0_g1_i1	169.551	11.0955	1.75641	5.17844	2.23744e-07	2.43458e-06	XP_007692603.1	-	-	-	-	-	-	-	-	-	-
TRINITY_DN13888_c0_g1_i1	112.037	10.4983	2.00273	4.24335	2.20211e-05	0.000175152	KNG52089.1	-	-	-	-	-	-	-	-	-	-
TRINITY_DN13911_c0_g1_i1	278.157	9.42147	1.34864	5.50292	3.73543e-08	4.76243e-07	KNG46155.1	-	-	-	-	-	-	-	-	-	-
TRINITY_DN13916_c0_g1_i2	95.079	7.92198	1.98984	2.97611	0.0029193	0.0164452	XP_020267495.1	-	-	-	-	-	-	-	-	Zmw_sc05871.1.g00020.1	bZIP
TRINITY_DN13928_c0_g1_i2	68.3872	9.78563	1.85146	4.20514	2.6092e-05	0.000205255	XP_018385826.1	-	-	-	-	-	-	-	-	-	-
TRINITY_DN13935_c0_g1_i1	71.7656	9.85579	2.09165	3.75578	0.000172802	0.0012067	OWY55754.1	-	-	-	-	-	-	-	-	-	-
TRINITY_DN13943_c0_g2_i2	137.325	10.7919	1.76529	4.98041	6.345e-07	6.38995e-06	-	-	-	-	-	-	-	-	-	-	-
TRINITY_DN13952_c0_g2_i2	276.895	11.8035	1.78856	5.48124	4.22365e-08	5.31284e-07	KNG50832.1	-	-	-	-	-	-	-	-	-	-
TRINITY_DN139536_c0_g1_i1	302.127	11.9292	1.61361	6.15339	7.58448e-10	1.44331e-08	OWY58094.1	-	-	-	-	-	-	-	-	-	-
TRINITY_DN13954_c1_g1_i1	45.2346	9.18997	2.10096	3.42223	0.000621102	0.00396362	OWY49781.1	-	-	-	-	-	-	-	-	KZV39672.1	NAC
TRINITY_DN1396_c3_g1_i1	571.639	5.53103	0.64676	5.45958	4.77267e-08	5.93799e-07	-	-	-	-	-	-	-	-	O	-	-
TRINITY_DN13986_c0_g1_i2	73.7955	9.89515	2.03351	3.88252	0.000103379	0.000747369	-	-	-	-	-	-	-	-	-	-	-
TRINITY_DN1399_c0_g1_i12	4068.01	5.14293	0.610871	5.145	2.67517e-07	2.87954e-06	-	-	-	-	-	-	-	-	-	-	-
TRINITY_DN13992_c0_g1_i2	169.245	11.0932	1.67053	5.4433	5.23016e-08	6.45205e-07	KAB2109584.1	-	-	-	-	-	-	-	-	-	-
TRINITY_DN13993_c0_g1_i1	1336.4	11.6672	1.18463	8.16054	3.33529e-16	4.44288e-14	RYN98552.1	-	-	-	-	-	-	-	-	-	-
TRINITY_DN13996_c0_g1_i1	446.35	12.4923	1.68244	6.23635	4.47894e-10	9.17672e-09	RYN88947.1	-	-	-	-	-	-	-	-	-	-
TRINITY_DN14002_c0_g1_i2	224.403	11.5003	1.67963	5.65616	1.54795e-08	2.14453e-07	XP_028503438.1	-	-	-	-	-	-	-	-	-	-
TRINITY_DN14005_c0_g1_i1	374.815	12.2402	1.60727	6.37121	1.87542e-10	4.21241e-09	RYO55050.1	-	-	-	-	-	-	-	-	-	-
TRINITY_DN14024_c0_g1_i3	926.109	13.5452	1.58016	7.30637	2.7446e-13	1.56617e-11	XP_018380297.1	-	-	-	-	-	-	-	-	-	-
TRINITY_DN14025_c0_g2_i2	133.706	7.29975	1.38392	3.82951	0.000128401	0.000914486	KNG46265.1	-	-	-	-	-	-	-	-	-	-
TRINITY_DN14026_c0_g1_i1	8995.32	3.96235	0.480713	4.08218	4.46162e-05	0.000340442	XP_008775734.1	-	-	-	-	-	-	-	-	-	-
TRINITY_DN14033_c0_g1_i1	125.23	10.6589	1.84031	4.70514	2.53696e-06	2.31779e-05	RYO02672.1	-	-	-	-	-	-	-	-	-	-
TRINITY_DN14033_c0_g2_i1	57.4487	9.53482	2.08548	3.61298	0.000302693	0.00202951	RAR01973.1	-	-	-	-	-	-	-	-	-	-
TRINITY_DN14036_c0_g1_i4	538.958	12.7643	1.65073	6.5209	6.98859e-11	1.78097e-09	XP_018380118.1	-	-	-	-	-	-	-	-	-	-
TRINITY_DN14042_c0_g1_i1	79.9917	10.0118	1.80808	4.43111	9.37499e-06	7.82212e-05	XP_008798437.1	-	-	-	-	-	-	-	-	-	-
TRINITY_DN140436_c0_g1_i1	63176.1	6.29039	0.817179	5.25025	1.51892e-07	1.70856e-06	TQE12646.1	Uncharacterized protein	C1H46_001858	Malus baccata (Siberian crab apple) (Pyrus baccata)	-	-	-	-	-	-	-
TRINITY_DN140436_c0_g2_i1	82192	6.69208	0.691541	6.78496	1.16121e-11	3.78645e-10	AAB82777.1	Ripening-associated protein (Fragment)	-	Musa acuminata (Banana) (Musa cavendishii)	-	-	-	-	-	-	-
TRINITY_DN14044_c0_g1_i1	1710.89	4.48625	0.779483	3.18961	0.00142463	0.00852213	-	-	-	-	-	-	-	-	-	-	-
TRINITY_DN14044_c0_g2_i1	217.179	8.94748	1.42395	4.87902	1.06615e-06	1.03925e-05	-	-	-	-	-	-	-	-	-	-	-
TRINITY_DN14046_c0_g1_i1	140.901	10.829	1.7885	4.93652	7.95279e-07	7.89613e-06	XP_018383488.1	-	-	-	-	-	-	-	-	-	-
TRINITY_DN14063_c0_g1_i2	44.3249	9.16043	2.01224	3.55843	0.000373076	0.00246463	-	-	-	-	-	-	-	-	-	-	-
TRINITY_DN14064_c0_g1_i9	59.7063	9.59031	1.94608	3.90031	9.60683e-05	0.000697023	-	-	-	-	-	-	-	-	-	-	-
TRINITY_DN14071_c0_g1_i2	77.8357	5.42236	1.26128	2.71341	0.0066595	0.0349895	RII06320.1	-	-	-	-	-	-	-	-	-	-
TRINITY_DN14071_c0_g2_i4	325.626	12.0373	1.64515	6.10118	1.05291e-09	1.93479e-08	KAB2102490.1	-	-	-	-	-	-	-	-	-	-
TRINITY_DN14072_c0_g1_i1	177.415	11.1612	1.6648	5.50288	3.73646e-08	4.76243e-07	XP_028501650.1	-	-	-	-	-	-	-	-	-	-
TRINITY_DN14074_c0_g2_i1	65.2728	9.71884	1.89385	4.07575	4.58666e-05	0.00034911	XP_008027323.1	-	-	-	-	-	-	-	-	-	-
TRINITY_DN14075_c0_g2_i1	164.683	11.0538	1.68145	5.38453	7.26324e-08	8.70332e-07	RYN44241.1	-	-	-	-	-	-	-	-	-	-
TRINITY_DN1408_c0_g1_i4	1317.18	14.0533	1.56936	7.68043	1.5856e-14	1.36087e-12	OWY41580.1	-	-	-	-	-	-	-	-	Cc01_g08720	NAC
TRINITY_DN140837_c0_g1_i1	44.2063	9.15685	2.22693	3.21377	0.00131003	0.00788916	KAB2103471.1	-	-	-	-	-	-	-	-	-	-
TRINITY_DN14086_c0_g1_i1	41.7904	9.0755	2.03867	3.47065	0.000519204	0.00335082	KAB2108571.1	-	-	-	-	-	-	-	-	-	-
TRINITY_DN14086_c0_g3_i2	316.619	11.9969	1.64462	6.07853	1.21287e-09	2.19716e-08	RYN62902.1	-	-	-	-	-	-	-	-	-	-
TRINITY_DN14087_c0_g1_i1	260.695	8.36366	1.24302	5.1195	3.06339e-07	3.26085e-06	KNG46449.1	-	-	-	-	-	-	-	-	Vang02g01940.3	B3
TRINITY_DN14095_c0_g1_i1	373.082	12.2336	1.60781	6.3649	1.95422e-10	4.36618e-09	KAB2110773.1	-	-	-	-	-	-	-	-	-	-
TRINITY_DN14095_c0_g2_i1	93.2966	7.88912	1.89146	3.11354	0.00184861	0.0108343	RAR12541.1	-	-	-	-	-	-	-	-	-	-
TRINITY_DN14105_c0_g2_i1	136.251	8.26441	1.48988	4.20463	2.61506e-05	0.000205635	KNG52636.1	-	-	-	-	-	-	-	-	-	-
TRINITY_DN14109_c0_g1_i4	6258.88	9.63955	0.550568	13.8758	8.8857e-44	4.69021e-40	-	-	-	-	-	-	-	-	-	-	-
TRINITY_DN14114_c0_g1_i1	34.688	8.80684	2.13901	3.18225	0.00146137	0.00871601	-	-	-	-	-	-	-	-	-	-	-
TRINITY_DN14119_c0_g1_i1	571.733	12.8492	1.63364	6.64115	3.11244e-11	8.82666e-10	KAB2104325.1	-	-	-	-	-	-	-	-	-	-
TRINITY_DN14128_c0_g1_i1	55.323	9.48038	2.34743	3.18662	0.00143945	0.00860105	RAR11917.1	-	-	-	-	-	-	-	-	-	-
TRINITY_DN14137_c0_g1_i1	57.9827	9.54816	2.08469	3.62076	0.000293744	0.0019742	RYN36965.1	-	-	-	-	-	-	-	-	-	-
TRINITY_DN141371_c0_g1_i1	136.06	10.7785	1.97631	4.44188	8.91749e-06	7.45514e-05	XP_028508258.1	-	-	-	-	-	-	-	-	-	-
TRINITY_DN14138_c0_g1_i1	117.514	10.5671	2.06568	4.14737	3.36317e-05	0.000261108	RAR01071.1	-	-	-	-	-	-	-	-	-	-
TRINITY_DN14155_c0_g2_i2	256.576	11.6936	1.78956	5.41674	6.06946e-08	7.38268e-07	XP_007698067.1	-	-	-	-	-	-	-	-	-	-
TRINITY_DN14162_c0_g1_i2	831.929	13.3905	1.57513	7.23146	4.77813e-13	2.50953e-11	KAB2110262.1	-	-	-	-	-	-	-	-	-	-
TRINITY_DN14162_c0_g2_i1	96.9586	10.2898	2.06461	4.01519	5.93981e-05	0.000443616	KNG49830.1	-	-	-	-	-	-	-	-	-	-
TRINITY_DN1421_c0_g3_i1	182.006	4.91553	0.780011	3.73781	0.00018563	0.00129009	AGN33443.1	Glycosyltransferase (EC 2.4.1.-)	-	Allium cepa (Onion)	UDP-glycosyltransferase activity [GO:0008194]	-	-	-	CG	-	-
TRINITY_DN14211_c0_g1_i5	1557.45	14.2951	1.59907	7.6889	1.48409e-14	1.2842e-12	RYN34162.1	-	-	-	-	-	-	-	-	-	-
TRINITY_DN14239_c0_g1_i1	169.762	11.0978	1.79022	5.08193	3.73626e-07	3.9227e-06	KNG52502.1	-	-	-	-	-	-	-	-	-	-
TRINITY_DN14241_c0_g1_i2	35.6635	8.84589	2.31683	2.95485	0.00312825	0.0175148	-	-	-	-	-	-	-	-	-	-	-
TRINITY_DN14248_c0_g2_i1	46.6384	9.23315	2.04892	3.53022	0.000415208	0.00272294	XP_008809323.1	-	-	-	-	-	-	-	-	GSMUA_Achr10P17130_001	bHLH
TRINITY_DN14255_c1_g1_i3	5347.94	13.6127	1.17474	9.88532	4.8204e-23	2.21251e-20	RDI83060.1	-	-	-	-	-	-	-	-	-	-
TRINITY_DN142557_c0_g1_i1	37.8878	6.56753	1.71493	2.66339	0.00773568	0.0400902	ONK56740.1	DUF3700 domain-containing protein	A4U43_C10F12260	Asparagus officinalis (Garden asparagus)	-	-	-	-	-	-	-
TRINITY_DN14264_c0_g1_i1	369.494	24.7049	4.78491	4.74509	2.08411e-06	1.93589e-05	AAK58480.1	-	-	-	-	-	-	-	-	-	-
TRINITY_DN14273_c0_g1_i1	55.1912	9.4769	2.44086	3.06322	0.00218968	0.0126489	KNG44496.1	-	-	-	-	-	-	-	-	-	-
TRINITY_DN142770_c0_g1_i1	1202.18	4.64202	0.721849	3.66008	0.000252139	0.00171506	-	-	-	-	-	-	-	-	-	-	-
TRINITY_DN1429_c0_g1_i4	721.906	10.717	1.20605	7.22777	4.90981e-13	2.5691e-11	XP_010910890.1	Pectinesterase (EC 3.1.1.11)	LOC105036866	Elaeis guineensis var. tenera (Oil palm)	aspartyl esterase activity [GO:0045330]; enzyme inhibitor activity [GO:0004857]; pectinesterase activity [GO:0030599]	-	cell wall modification [GO:0042545]; pectin catabolic process [GO:0045490]	PATHWAY: Glycan metabolism. {ECO:0000256|ARBA:ARBA00004881}.; PATHWAY: Glycan metabolism; pectin degradation; 2-dehydro-3-deoxy-D-gluconate from pectin: step 1/5. {ECO:0000256|ARBA:ARBA00005184, ECO:0000256|RuleBase:RU000589}.	-	Vang03g11510.1	Trihelix
TRINITY_DN14293_c0_g1_i2	140.301	10.8226	1.69869	5.19377	2.06076e-07	2.26025e-06	RII24823.1	-	-	-	-	-	-	-	-	-	-
TRINITY_DN14296_c0_g1_i1	145.38	10.8737	1.69446	5.23691	1.63286e-07	1.82656e-06	XP_028500405.1	-	-	-	-	-	-	-	-	-	-
TRINITY_DN14296_c1_g1_i1	116.248	8.04696	1.39419	4.33727	1.44265e-05	0.000116994	RII07187.1	-	-	-	-	-	-	-	-	-	-
TRINITY_DN14304_c0_g1_i6	2502.95	11.9762	1.15094	8.66791	4.40138e-18	9.00533e-16	XP_028511682.1	-	-	-	-	-	-	-	-	-	-
TRINITY_DN14305_c0_g1_i1	175.843	11.1483	1.66341	5.49975	3.80328e-08	4.84029e-07	KAB2102276.1	-	-	-	-	-	-	-	-	-	-
TRINITY_DN14309_c0_g1_i2	55.0857	9.47422	2.21844	3.36913	0.000754055	0.00474608	KNG45439.1	-	-	-	-	-	-	-	-	-	-
TRINITY_DN14312_c0_g1_i2	211.958	11.4178	1.64328	5.7311	9.978e-09	1.44147e-07	XP_018389099.1	-	-	-	-	-	-	-	-	-	-
TRINITY_DN14318_c0_g1_i1	125.042	10.6567	1.92244	4.50299	6.7005e-06	5.71139e-05	KNG49253.1	-	-	-	-	-	-	-	-	-	-
TRINITY_DN14346_c0_g3_i1	71.235	9.84507	2.15579	3.63907	0.000273619	0.00185073	KNG46525.1	-	-	-	-	-	-	-	-	-	-
TRINITY_DN143504_c0_g1_i1	33.1655	8.74234	2.44778	2.75447	0.00587878	0.0312256	XP_021528600.1	-	-	-	-	-	-	-	-	-	-
TRINITY_DN14352_c1_g1_i2	1330.39	14.0678	1.561	7.7308	1.06876e-14	9.60225e-13	RII06345.1	-	-	-	-	-	-	-	-	-	-
TRINITY_DN143555_c0_g1_i1	404.141	12.3489	1.60923	6.43097	1.26794e-10	2.98613e-09	RYN54586.1	-	-	-	-	-	-	-	-	-	-
TRINITY_DN14368_c0_g1_i1	72.7839	9.87605	1.90617	4.13188	3.59808e-05	0.000278271	-	-	-	-	-	-	-	-	-	-	-
TRINITY_DN14369_c0_g2_i1	472.324	12.5737	1.59411	6.63299	3.2895e-11	9.25421e-10	XP_018386896.1	-	-	-	-	-	-	-	-	-	-
TRINITY_DN143712_c0_g1_i3	277.445	9.30962	1.36659	5.34879	8.85431e-08	1.04702e-06	XP_018388463.1	-	-	-	-	-	-	-	-	-	-
TRINITY_DN14380_c0_g1_i1	114.927	10.5345	1.75371	4.86655	1.13564e-06	1.1024e-05	XP_018380716.1	-	-	-	-	-	-	-	-	-	-
TRINITY_DN14381_c0_g2_i1	215.092	4.65428	0.896638	2.96025	0.00307386	0.0172354	-	-	-	-	-	-	-	-	-	-	-
TRINITY_DN14382_c0_g2_i1	51.7833	9.38504	2.26227	3.26443	0.00109683	0.00669692	KNG52034.1	-	-	-	-	-	-	-	-	-	-
TRINITY_DN14383_c0_g1_i1	295.599	9.33989	1.95954	3.74572	0.00017988	0.00125178	KNG48578.1	-	-	-	-	-	-	-	-	-	-
TRINITY_DN144_c0_g1_i1	604.432	7.64351	1.12236	5.02826	4.94943e-07	5.08887e-06	KNG45936.1	-	-	-	-	-	-	-	-	-	-
TRINITY_DN144_c0_g2_i1	12020.2	13.8065	0.947858	12.456	1.29745e-35	2.38207e-32	OWY50888.1	-	-	-	-	-	-	-	-	-	-
TRINITY_DN14406_c0_g1_i9	521.565	12.7168	1.60843	6.66286	2.68555e-11	7.73552e-10	RAR11892.1	-	-	-	-	-	-	-	-	-	-
TRINITY_DN1441_c6_g1_i1	259.462	4.65911	0.915344	2.90504	0.00367206	0.0203038	-	-	-	-	-	-	-	-	-	-	-
TRINITY_DN14412_c0_g1_i1	89.6616	10.1769	1.85193	4.41534	1.00852e-05	8.37501e-05	KNG45200.1	-	-	-	-	-	-	-	-	-	-
TRINITY_DN14412_c0_g2_i1	741.121	13.2238	1.58794	7.0681	1.57067e-12	6.88013e-11	RYN93822.1	-	-	-	-	-	-	-	-	-	-
TRINITY_DN14424_c0_g1_i1	82.3017	7.4999	1.81222	3.0349	0.00240614	0.0137768	ONK71085.1	Uncharacterized protein	A4U43_C04F4570	Asparagus officinalis (Garden asparagus)	-	-	-	-	-	-	-
TRINITY_DN14443_c0_g1_i2	532.251	12.7462	1.60203	6.70784	1.97521e-11	6.0318e-10	XP_028506429.1	-	-	-	-	-	-	-	-	-	-
TRINITY_DN144494_c0_g1_i1	146.507	10.8851	1.69632	5.23786	1.62449e-07	1.81811e-06	XP_018389743.1	-	-	-	-	-	-	-	-	-	-
TRINITY_DN144531_c0_g1_i2	101.869	10.3606	1.74939	4.77918	1.76011e-06	1.65459e-05	-	-	-	-	-	-	-	-	-	-	-
TRINITY_DN14454_c0_g1_i4	2784.84	12.6691	1.18567	8.9984	2.29032e-19	5.75675e-17	RYN29593.1	-	-	-	-	-	-	-	-	-	-
TRINITY_DN14454_c1_g1_i1	114.251	7.20535	1.71714	3.0314	0.00243425	0.0139227	RAR11318.1	-	-	-	-	-	-	-	-	-	-
TRINITY_DN14454_c2_g1_i1	58.7637	9.56717	1.89914	3.98453	6.7613e-05	0.000501422	KAB2109609.1	-	-	-	-	-	-	-	-	-	-
TRINITY_DN14455_c0_g1_i3	159.251	6.12571	1.25497	3.28749	0.00101083	0.00622221	-	-	-	-	-	-	-	-	-	-	-
TRINITY_DN14457_c0_g1_i1	1903.3	3.84285	0.645946	2.85295	0.00433151	0.0235917	-	-	-	-	-	-	-	-	-	-	-
TRINITY_DN14462_c0_g1_i2	135.927	10.7765	1.89378	4.63438	3.58008e-06	3.19949e-05	XP_020261740.1	-	-	-	-	-	-	-	-	Gh_A02G0666	G2-like
TRINITY_DN14463_c1_g3_i1	6918.44	3.20395	0.446433	2.69681	0.00700073	0.0366093	XP_010916176.1	uncharacterized protein At1g66480	LOC105041079	Elaeis guineensis var. tenera (Oil palm)	-	-	-	-	-	-	-
TRINITY_DN14465_c0_g1_i3	319.12	12.0082	1.61609	6.19283	5.90923e-10	1.16657e-08	OWY50269.1	-	-	-	-	-	-	-	-	-	-
TRINITY_DN14469_c0_g1_i2	1465.04	14.2069	1.55849	7.8325	4.78249e-15	4.77424e-13	RYO61998.1	-	-	-	-	-	-	-	-	-	-
TRINITY_DN14477_c0_g1_i1	127.583	10.6857	1.96559	4.41889	9.92079e-06	8.24656e-05	PWO07979.1	-	-	-	-	-	-	-	-	-	-
TRINITY_DN14477_c0_g2_i1	885.112	11.0135	1.19319	7.55416	4.21575e-14	3.16196e-12	RYN52293.1	-	-	-	-	-	-	-	-	-	-
TRINITY_DN14478_c0_g2_i1	109.664	10.4674	1.96346	4.31251	1.61411e-05	0.000130149	XP_018389807.1	-	-	-	-	-	-	-	-	-	-
TRINITY_DN14481_c0_g1_i1	243.93	11.6207	1.70118	5.65527	1.556e-08	2.15426e-07	RYN91244.1	-	-	-	-	-	-	-	-	-	-
TRINITY_DN14486_c0_g1_i3	71.0832	9.84132	1.85918	4.21763	2.46883e-05	0.000195117	-	-	-	-	-	-	-	-	-	-	-
TRINITY_DN14488_c0_g1_i1	165.181	11.0583	1.90869	4.74582	2.07661e-06	1.92978e-05	RAR16246.1	-	-	-	-	-	-	-	-	-	-
TRINITY_DN14488_c0_g2_i1	58.454	9.55984	2.16199	3.49671	0.000471031	0.00306239	RAR16246.1	-	-	-	-	-	-	-	-	-	-
TRINITY_DN14488_c1_g1_i1	478.042	12.5911	1.58947	6.66329	2.67768e-11	7.7234e-10	XP_018382303.1	-	-	-	-	-	-	-	-	-	-
TRINITY_DN14490_c0_g1_i1	115.016	6.96145	1.46392	3.38915	0.000701098	0.00443326	KNG44643.1	-	-	-	-	-	-	-	-	-	-
TRINITY_DN1451_c4_g2_i3	217.952	5.00056	1.14677	2.61654	0.00888249	0.0455029	XP_009790937.1	Chlorophyll a-b binding protein, chloroplastic	LOC104238308	Nicotiana sylvestris (Wood tobacco) (South American tobacco)	chlorophyll binding [GO:0016168]	chloroplast thylakoid membrane [GO:0009535]; photosystem I [GO:0009522]; photosystem II [GO:0009523]	photosynthesis, light harvesting [GO:0009765]; protein-chromophore linkage [GO:0018298]	-	-	Bradi3g42627.5.p	ERF
TRINITY_DN14510_c0_g1_i20	32.8028	8.72538	2.21566	3.03538	0.00240229	0.0137585	-	-	-	-	-	-	-	-	O	-	-
TRINITY_DN14513_c0_g1_i1	150.383	10.9225	1.68825	5.28509	1.25641e-07	1.44444e-06	XP_018378925.1	-	-	-	-	-	-	-	-	-	-
TRINITY_DN14515_c0_g1_i1	143.752	10.8578	2.24905	3.93844	8.20117e-05	0.000600921	KNG47618.1	-	-	-	-	-	-	-	-	-	-
TRINITY_DN14515_c0_g2_i1	1491.72	14.2329	1.65557	7.38894	1.48e-13	9.2567e-12	XP_028512121.1	-	-	-	-	-	-	-	-	-	-
TRINITY_DN14529_c0_g3_i2	54.654	9.46286	2.28268	3.26934	0.00107798	0.00659805	NP_005372.2	-	-	-	-	-	-	-	-	-	-
TRINITY_DN14529_c1_g1_i1	43.5735	9.13606	2.26338	3.15283	0.00161696	0.00956427	KNG48938.1	-	-	-	-	-	-	-	-	-	-
TRINITY_DN14532_c0_g1_i4	296.827	11.9037	1.63491	6.05765	1.38124e-09	2.46099e-08	RYN49473.1	-	-	-	-	-	-	-	-	-	-
TRINITY_DN14532_c0_g2_i1	48.9456	9.30376	2.23354	3.27003	0.00107534	0.0065838	RAR07079.1	-	-	-	-	-	-	-	-	-	-
TRINITY_DN14534_c0_g2_i6	150.838	8.42688	1.37713	4.66688	3.05809e-06	2.76518e-05	RYN33530.1	-	-	-	-	-	-	-	-	-	-
TRINITY_DN14536_c0_g1_i2	508.946	12.6814	1.64698	6.48545	8.84672e-11	2.1808e-09	OWY42531.1	-	-	-	-	-	-	-	-	-	-
TRINITY_DN14536_c0_g2_i1	82.1441	10.0506	2.09359	3.84537	0.00012037	0.000861501	KNG45498.1	-	-	-	-	-	-	-	-	-	-
TRINITY_DN14542_c0_g1_i1	115.823	10.546	1.73034	4.93893	7.85521e-07	7.80843e-06	XP_028502583.1	-	-	-	-	-	-	-	-	-	-
TRINITY_DN14553_c0_g1_i1	108.833	7.93123	1.55455	3.8154	0.000135961	0.000964908	RAR08405.1	-	-	-	-	-	-	-	-	-	-
TRINITY_DN14560_c0_g4_i1	265.409	9.25415	1.31042	5.53574	3.09919e-08	4.02427e-07	KNG47501.1	-	-	-	-	-	-	-	-	-	-
TRINITY_DN145611_c0_g1_i1	50.0102	9.33479	2.15268	3.40728	0.000656131	0.00416952	KNG44118.1	-	-	-	-	-	-	-	-	-	-
TRINITY_DN1457_c0_g1_i1	1100.28	8.30137	1.06024	5.94337	2.79226e-09	4.60761e-08	KNG50184.1	-	-	-	-	-	-	-	-	-	-
TRINITY_DN14582_c0_g1_i2	152.611	10.9441	1.98226	4.51207	6.41965e-06	5.48417e-05	KNG47267.1	-	-	-	-	-	-	-	-	-	-
TRINITY_DN14582_c0_g2_i3	576.2	12.8606	1.59557	6.80673	9.98424e-12	3.34607e-10	XP_018392045.1	-	-	-	-	-	-	-	-	-	-
TRINITY_DN14596_c1_g2_i1	1727.26	14.4444	1.55781	7.98841	1.36687e-15	1.57701e-13	XP_018383743.1	-	-	-	-	-	-	-	-	PH01001490G0340	MYB_related
TRINITY_DN14604_c0_g2_i1	52.7094	9.41061	2.08069	3.56161	0.000368587	0.0024384	XP_008020787.1	-	-	-	-	-	-	-	-	-	-
TRINITY_DN14605_c0_g1_i3	66.166	9.73829	1.85847	4.1638	3.1299e-05	0.000243985	RYO02483.1	-	-	-	-	-	-	-	-	-	-
TRINITY_DN14607_c0_g1_i2	164.096	11.0485	1.67126	5.4142	6.15641e-08	7.4746e-07	XP_028506960.1	-	-	-	-	-	-	-	-	-	-
TRINITY_DN1461_c0_g1_i10	4635.77	9.14803	0.855311	8.35723	6.42076e-17	1.00048e-14	-	-	-	-	-	-	-	-	S	-	-
TRINITY_DN1461_c0_g2_i2	1259.21	7.53355	0.57805	9.57279	1.04062e-21	3.85458e-19	-	-	-	-	-	-	-	-	S	-	-
TRINITY_DN1461_c0_g3_i1	146.184	10.8817	1.68968	5.25645	1.4686e-07	1.65903e-06	-	-	-	-	-	-	-	-	-	-	-
TRINITY_DN1461_c0_g4_i1	133.988	5.8369	0.926095	4.1431	3.42646e-05	0.000265777	-	-	-	-	-	-	-	-	-	-	-
TRINITY_DN1461_c1_g1_i1	378.802	9.86152	1.29929	6.05062	1.44285e-09	2.55353e-08	-	-	-	-	-	-	-	-	-	-	-
TRINITY_DN14620_c0_g1_i1	39.3055	8.98734	2.40714	2.90276	0.00369889	0.0204227	-	-	-	-	-	-	-	-	-	-	-
TRINITY_DN146372_c0_g1_i4	60.2962	9.60427	1.88595	4.03207	5.52888e-05	0.00041542	RYN26738.1	-	-	-	-	-	-	-	-	-	-
TRINITY_DN1465_c0_g1_i1	3202.32	15.335	1.55404	8.58091	9.41291e-18	1.67713e-15	XP_028511689.1	-	-	-	-	-	-	-	-	-	-
TRINITY_DN14650_c0_g1_i1	97.2646	7.91567	1.47782	4.00297	6.25514e-05	0.000465766	KNG51717.1	-	-	-	-	-	-	-	-	-	-
TRINITY_DN14650_c0_g2_i1	3707.88	13.0861	1.16482	9.51745	1.77483e-21	6.40562e-19	XP_018383216.1	-	-	-	-	-	-	-	-	-	-
TRINITY_DN14667_c0_g1_i3	175.823	11.148	1.67014	5.4774	4.31633e-08	5.41296e-07	XP_018381649.1	-	-	-	-	-	-	-	-	-	-
TRINITY_DN146690_c0_g1_i1	87.9347	10.1489	1.91032	4.26571	1.99267e-05	0.000159183	RYO31835.1	-	-	-	-	-	-	-	-	-	-
TRINITY_DN14682_c0_g2_i1	194.437	11.2931	1.69756	5.4744	4.38994e-08	5.49908e-07	XP_028503290.1	-	-	-	-	-	-	-	-	-	-
TRINITY_DN14682_c0_g3_i1	303.877	11.9375	1.61815	6.1413	8.18513e-10	1.54301e-08	KAB2106480.1	-	-	-	-	-	-	-	-	-	-
TRINITY_DN146828_c0_g1_i1	49.5584	9.32065	2.29252	3.19328	0.00140668	0.00843271	-	-	-	-	-	-	-	-	-	-	-
TRINITY_DN14684_c0_g1_i2	138.914	10.8084	1.72489	5.10663	3.27953e-07	3.47515e-06	EFQ94279.1	-	-	-	-	-	-	-	-	-	-
TRINITY_DN14687_c0_g1_i1	651.242	10.5559	1.27775	6.69605	2.14133e-11	6.43041e-10	XP_018384099.1	-	-	-	-	-	-	-	-	-	-
TRINITY_DN14687_c0_g2_i1	123.018	10.6332	2.03918	4.23364	2.2994e-05	0.000182238	KNG44513.1	-	-	-	-	-	-	-	-	-	-
TRINITY_DN146883_c0_g1_i1	163.427	11.0426	1.67247	5.40672	6.41881e-08	7.78121e-07	-	-	-	-	-	-	-	-	-	-	-
TRINITY_DN14693_c0_g2_i1	532.729	12.7474	1.58498	6.78077	1.19535e-11	3.87086e-10	RYO06162.1	-	-	-	-	-	-	-	-	-	-
TRINITY_DN14694_c2_g4_i2	6634.7	4.58797	0.545819	4.74146	2.12188e-06	1.96924e-05	XP_020267243.1	-	-	-	-	-	-	-	-	-	-
TRINITY_DN14694_c2_g5_i1	6444.95	4.14293	0.495281	4.32669	1.51366e-05	0.000122494	XP_020267243.1	-	-	-	-	-	-	-	-	-	-
TRINITY_DN14699_c0_g1_i1	61.5982	9.63532	2.42402	3.14986	0.0016335	0.00965401	KNG47750.1	-	-	-	-	-	-	-	-	-	-
TRINITY_DN14701_c0_g1_i1	85.5816	10.1097	2.09954	3.86263	0.000112172	0.000805972	XP_007712884.1	-	-	-	-	-	-	-	-	-	-
TRINITY_DN147029_c0_g1_i2	29.7576	8.5859	2.32759	2.82949	0.00466228	0.0252597	OWY50378.1	-	-	-	-	-	-	-	-	-	-
TRINITY_DN14703_c0_g2_i12	442.777	11.0521	1.57402	5.75091	8.87632e-09	1.29561e-07	XP_028503548.1	-	-	-	-	-	-	-	-	-	-
TRINITY_DN14707_c0_g1_i1	198.376	11.3224	1.6722	5.57493	2.47636e-08	3.28834e-07	RYN97599.1	-	-	-	-	-	-	-	-	-	-
TRINITY_DN14707_c0_g3_i1	38.1058	8.9426	2.51425	2.7613	0.00575717	0.0306181	RAQ99679.1	-	-	-	-	-	-	-	-	-	-
TRINITY_DN14718_c0_g2_i1	30.2453	8.60875	2.17129	3.0437	0.0023369	0.0134356	-	-	-	-	-	-	-	-	-	-	-
TRINITY_DN14738_c0_g1_i1	650.815	13.0361	1.7117	6.44746	1.13737e-10	2.70731e-09	XP_008812300.1	-	-	-	-	-	-	-	-	-	-
TRINITY_DN14744_c0_g1_i2	369.14	9.82556	1.30839	5.98108	2.21664e-09	3.76517e-08	-	-	-	-	-	-	-	-	-	-	-
TRINITY_DN14744_c0_g2_i2	389.363	9.90389	1.31955	5.98984	2.10048e-09	3.58806e-08	-	-	-	-	-	-	-	-	-	-	-
TRINITY_DN1476_c0_g1_i1	896.343	9.00021	0.921004	7.60063	2.94702e-14	2.29601e-12	-	-	-	-	-	-	-	-	-	-	-
TRINITY_DN14777_c0_g1_i1	927.604	13.5474	1.60183	7.20889	5.64082e-13	2.89423e-11	XP_018390020.1	-	-	-	-	-	-	-	-	-	-
TRINITY_DN14778_c0_g4_i1	444.989	12.4879	1.62198	6.46607	1.00584e-10	2.4382e-09	KAB2110873.1	-	-	-	-	-	-	-	-	-	-
TRINITY_DN14778_c2_g1_i1	822.454	13.374	1.5824	7.1878	6.58449e-13	3.3219e-11	RYN91005.1	-	-	-	-	-	-	-	-	-	-
TRINITY_DN14778_c3_g1_i1	186.848	11.2361	1.98747	4.64716	3.36536e-06	3.02038e-05	RAR15982.1	-	-	-	-	-	-	-	-	-	-
TRINITY_DN14779_c0_g1_i1	193.779	11.2886	1.91931	4.83957	1.30121e-06	1.25048e-05	RAR07032.1	-	-	-	-	-	-	-	-	-	-
TRINITY_DN147800_c0_g1_i1	199.678	11.3318	1.67324	5.57709	2.4458e-08	3.25082e-07	OWY43875.1	-	-	-	-	-	-	-	-	-	-
TRINITY_DN14790_c0_g1_i2	136.745	10.7854	1.70185	5.16225	2.43998e-07	2.64187e-06	OWY46608.1	-	-	-	-	-	-	-	-	-	-
TRINITY_DN14792_c0_g1_i1	46.9088	9.24245	2.2074	3.28098	0.00103447	0.00635385	XP_014075371.1	-	-	-	-	-	-	-	-	-	-
TRINITY_DN14796_c0_g1_i1	78.2122	9.97982	2.22218	3.591	0.000329416	0.00219439	KNG50618.1	-	-	-	-	-	-	-	-	-	-
TRINITY_DN14798_c0_g1_i1	243.667	11.619	1.6516	5.82406	5.74365e-09	8.77536e-08	XP_018389587.1	-	-	-	-	-	-	-	-	-	-
TRINITY_DN148_c0_g2_i1	37866.5	4.20047	0.578466	3.80398	0.000142391	0.0010075	XP_020275539.1	-	-	-	-	-	-	-	O	Sme2.5_00187.1_g00004.1	MYB_related
TRINITY_DN14802_c3_g1_i1	121.699	10.6171	2.5288	3.40758	0.000655418	0.00416562	XP_004984666.1	SHSP domain-containing protein	101770955 SETIT_9G458700v2	Setaria italica (Foxtail millet) (Panicum italicum)	protein self-association [GO:0043621]; unfolded protein binding [GO:0051082]	-	protein complex oligomerization [GO:0051259]; protein folding [GO:0006457]; response to heat [GO:0009408]; response to hydrogen peroxide [GO:0042542]; response to salt stress [GO:0009651]	-	O	WALNUT_00030998-RA	NF-YB
TRINITY_DN14807_c0_g1_i1	495.922	12.6442	1.61972	6.57165	4.97618e-11	1.33162e-09	XP_018385644.1	-	-	-	-	-	-	-	-	-	-
TRINITY_DN14808_c0_g1_i1	214.677	11.4363	1.65426	5.70424	1.16861e-08	1.65872e-07	XP_018382297.1	-	-	-	-	-	-	-	-	-	-
TRINITY_DN14808_c0_g2_i1	58.22	9.55406	2.15342	3.50794	0.000451593	0.0029469	KNG46278.1	-	-	-	-	-	-	-	-	-	-
TRINITY_DN148098_c0_g1_i1	133.64	10.7522	1.71031	5.11732	3.09913e-07	3.2964e-06	KAB2105862.1	-	-	-	-	-	-	-	-	-	-
TRINITY_DN14824_c0_g1_i1	202.68	11.353	1.6785	5.57226	2.51459e-08	3.33596e-07	KAB2612398.1	Benzyl alcohol O-benzoyltransferase-like	D8674_034714	Pyrus ussuriensis x Pyrus communis	transferase activity, transferring acyl groups other than amino-acyl groups [GO:0016747]	-	-	-	S	-	-
TRINITY_DN14835_c0_g1_i1	1903.08	14.5843	1.5552	8.09171	5.88315e-16	7.41575e-14	XP_009770048.1	glutathione S-transferase U17-like	LOC104220805	Nicotiana sylvestris (Wood tobacco) (South American tobacco)	transferase activity [GO:0016740]	-	glutathione metabolic process [GO:0006749]	-	-	-	-
TRINITY_DN14835_c0_g2_i1	450.967	12.5071	1.60511	6.54602	5.90915e-11	1.53554e-09	XP_008778698.1	-	-	-	-	-	-	-	-	-	-
TRINITY_DN14835_c0_g4_i1	9140.3	4.84352	0.772568	3.68061	0.000232677	0.00159268	AZL41274.1	Glutathione S-transferase	-	Datisca glomerata (Durango root)	transferase activity [GO:0016740]	-	glutathione metabolic process [GO:0006749]	-	-	-	-
TRINITY_DN14840_c0_g1_i1	160.84	11.0195	1.69818	5.31124	1.0888e-07	1.26483e-06	XP_010923184.1	Glycosyltransferase (EC 2.4.1.-)	LOC105046323	Elaeis guineensis var. tenera (Oil palm)	UDP-glycosyltransferase activity [GO:0008194]	-	-	-	-	TRIUR3_17264-P1	GRAS
TRINITY_DN14849_c0_g1_i1	537.627	12.7607	1.62601	6.61786	3.64438e-11	1.01244e-09	XP_028505903.1	-	-	-	-	-	-	-	-	-	-
TRINITY_DN14851_c0_g1_i2	135.604	8.27663	1.35021	4.64863	3.3414e-06	3.00143e-05	RYN28544.1	-	-	-	-	-	-	-	-	-	-
TRINITY_DN14860_c0_g1_i1	6460.3	4.76127	0.620564	4.44961	8.60266e-06	7.21049e-05	PKA65626.1	Uncharacterized protein	AXF42_Ash020556	Apostasia shenzhenica	-	chloroplast membrane [GO:0031969]; integral component of membrane [GO:0016021]	-	-	-	-	-
TRINITY_DN14864_c0_g1_i3	826.906	13.3817	1.57197	7.24044	4.47236e-13	2.38405e-11	XP_028511288.1	-	-	-	-	-	-	-	-	-	-
TRINITY_DN14868_c0_g1_i1	647.953	10.5556	1.23657	6.91879	4.55533e-12	1.70228e-10	RYN30805.1	-	-	-	-	-	-	-	-	-	-
TRINITY_DN14868_c1_g1_i1	76.116	9.94059	1.87027	4.24568	2.17933e-05	0.000173569	RYN29726.1	-	-	-	-	-	-	-	-	-	-
TRINITY_DN14872_c0_g1_i2	54.7525	9.46455	2.53036	2.95	0.00317773	0.0177682	XP_004233198.1	PSI-F	101245121	Solanum lycopersicum (Tomato) (Lycopersicon esculentum)	-	chloroplast thylakoid membrane [GO:0009535]; integral component of membrane [GO:0016021]; photosystem I reaction center [GO:0009538]	photosynthesis [GO:0015979]	-	S	-	-
TRINITY_DN14873_c0_g3_i1	81.8766	23.4542	3.05485	7.02298	2.17185e-12	9.09827e-11	-	-	-	-	-	-	-	-	-	-	-
TRINITY_DN14877_c0_g1_i1	215.564	11.4422	2.24989	4.19676	2.70766e-05	0.000212521	KNG49370.1	-	-	-	-	-	-	-	-	-	-
TRINITY_DN14877_c0_g2_i1	419.504	12.4028	1.90262	5.4676	4.5616e-08	5.6989e-07	RYN41890.1	-	-	-	-	-	-	-	-	-	-
TRINITY_DN14889_c0_g1_i2	525.642	8.86902	1.07198	6.40779	1.4764e-10	3.40677e-09	XP_010939776.1	L-ascorbate oxidase (EC 1.10.3.3)	LOC105058519	Elaeis guineensis var. tenera (Oil palm)	copper ion binding [GO:0005507]; L-ascorbate oxidase activity [GO:0008447]	extracellular region [GO:0005576]	-	-	-	Rsa1.0_03034.1_g00001.1	ERF
TRINITY_DN14899_c0_g1_i4	160.329	11.0148	1.72358	5.23029	1.6924e-07	1.88512e-06	RII05075.1	-	-	-	-	-	-	-	-	-	-
TRINITY_DN14925_c0_g1_i2	96.8032	10.2867	1.89016	4.38414	1.16442e-05	9.56804e-05	XP_020266731.1	-	-	-	-	-	-	-	-	GSMUA_Achr7P19680_001	NAC
TRINITY_DN14926_c0_g1_i2	100.35	10.3394	1.92689	4.3279	1.50538e-05	0.00012187	KNG44962.1	-	-	-	-	-	-	-	-	-	-
TRINITY_DN14926_c0_g2_i1	1219.48	13.9422	1.56321	7.63951	2.18057e-14	1.78448e-12	XP_018390892.1	-	-	-	-	-	-	-	-	-	-
TRINITY_DN14928_c0_g1_i1	82.5625	10.0579	1.91354	4.21101	2.54227e-05	0.000200396	KNG50566.1	-	-	-	-	-	-	-	-	-	-
TRINITY_DN14928_c1_g1_i1	669.269	13.0766	1.57839	7.01765	2.25629e-12	9.35917e-11	RII19257.1	-	-	-	-	-	-	-	-	-	-
TRINITY_DN14930_c0_g1_i1	122.484	10.6269	1.79326	4.81072	1.50388e-06	1.43028e-05	RYN28238.1	-	-	-	-	-	-	-	-	-	-
TRINITY_DN14943_c0_g1_i5	407.944	12.3624	1.60955	6.43808	1.2099e-10	2.86383e-09	XP_028506737.1	-	-	-	-	-	-	-	-	-	-
TRINITY_DN14944_c0_g1_i2	524.483	12.725	1.60403	6.68627	2.28925e-11	6.80763e-10	RYN37419.1	-	-	-	-	-	-	-	-	-	-
TRINITY_DN14946_c0_g1_i1	83.0108	10.0658	2.07952	3.87866	0.000105034	0.000758297	RAR12273.1	-	-	-	-	-	-	-	-	-	-
TRINITY_DN1495_c0_g1_i1	1703.59	6.61204	1.07334	4.29691	1.73195e-05	0.000139226	XP_008801786.2	-	-	-	-	-	-	-	-	-	-
TRINITY_DN14950_c0_g1_i1	324.897	12.034	1.6085	6.23811	4.42888e-10	9.08737e-09	XP_028507474.1	-	-	-	-	-	-	-	-	OGLUM12G00050.4	WRKY
TRINITY_DN149513_c0_g1_i1	98.4777	10.3119	1.7555	4.7348	2.19269e-06	2.03005e-05	XP_018386641.1	-	-	-	-	-	-	-	-	-	-
TRINITY_DN14953_c0_g1_i1	211.608	8.08824	1.54913	3.93011	8.49057e-05	0.000620404	KNG43905.1	-	-	-	-	-	-	-	-	-	-
TRINITY_DN14953_c0_g2_i2	1207.01	13.9274	1.6196	7.36441	1.77933e-13	1.07799e-11	XP_018501878.1	-	-	-	-	-	-	-	-	-	-
TRINITY_DN149534_c0_g1_i1	132.513	10.7404	1.90129	4.59712	4.28369e-06	3.77399e-05	RYN92134.1	-	-	-	-	-	-	-	-	-	-
TRINITY_DN14965_c0_g1_i3	510.644	12.6863	1.58879	6.72605	1.74327e-11	5.40477e-10	RII06295.1	-	-	-	-	-	-	-	-	-	-
TRINITY_DN14977_c0_g1_i1	24784.7	4.29504	0.652454	3.51755	0.000435554	0.0028484	XP_020256046.1	-	-	-	-	-	-	-	-	MDP0000247912	bHLH
TRINITY_DN14993_c0_g1_i3	127.662	10.6864	1.71321	5.07028	3.97241e-07	4.14692e-06	RYN53932.1	-	-	-	-	-	-	-	-	-	-
TRINITY_DN14998_c0_g1_i4	83.5236	4.94871	1.02584	2.87444	0.00404747	0.0221792	-	-	-	-	-	-	-	-	-	-	-
TRINITY_DN15003_c0_g1_i4	188.248	11.2468	1.6985	5.44411	5.20645e-08	6.42468e-07	RYN18407.1	-	-	-	-	-	-	-	-	-	-
TRINITY_DN15005_c0_g2_i1	167.436	11.0778	2.07511	4.37462	1.21642e-05	9.972e-05	XP_018389480.1	-	-	-	-	-	-	-	-	-	-
TRINITY_DN15007_c0_g1_i1	122.794	8.24167	1.37086	4.5531	5.28615e-06	4.5873e-05	RYN50753.1	-	-	-	-	-	-	-	-	-	-
TRINITY_DN15019_c0_g1_i1	40.3074	9.02363	2.44605	2.87142	0.00408629	0.022377	XP_007708095.1	-	-	-	-	-	-	-	-	-	-
TRINITY_DN150205_c0_g1_i3	129.827	10.7109	1.8045	4.82731	1.38389e-06	1.32481e-05	RYN30813.1	-	-	-	-	-	-	-	-	-	-
TRINITY_DN15026_c0_g1_i2	408.383	12.364	1.61245	6.42747	1.29745e-10	3.04882e-09	XP_018381443.1	-	-	-	-	-	-	-	-	-	-
TRINITY_DN15028_c0_g1_i2	456.735	12.5254	1.60345	6.56425	5.22951e-11	1.3871e-09	XP_018383047.1	-	-	-	-	-	-	-	-	-	-
TRINITY_DN15028_c0_g2_i1	64.6433	8.28704	2.00034	3.14298	0.00167236	0.00986707	XP_007705178.1	-	-	-	-	-	-	-	-	-	-
TRINITY_DN15029_c0_g1_i3	467.031	12.5575	1.59204	6.63142	3.32482e-11	9.34114e-10	KAB2103143.1	-	-	-	-	-	-	-	-	-	-
TRINITY_DN1503_c4_g1_i1	403.604	8.60137	1.74256	3.78832	0.000151669	0.00106814	-	-	-	-	-	-	-	-	-	-	-
TRINITY_DN15031_c0_g1_i1	616.892	8.25005	0.825122	7.57469	3.59973e-14	2.74379e-12	KAB2106623.1	-	-	-	-	-	-	-	-	-	-
TRINITY_DN15031_c0_g2_i2	92.6873	10.2248	2.06491	3.98313	6.80131e-05	0.000504212	KNG46559.1	-	-	-	-	-	-	-	-	-	-
TRINITY_DN15033_c0_g1_i1	669.101	13.0762	1.58728	6.97808	2.99238e-12	1.19207e-10	XP_018391917.1	-	-	-	-	-	-	-	-	-	-
TRINITY_DN15038_c1_g1_i7	8208.34	5.36521	0.480191	7.00807	2.41634e-12	9.88709e-11	XP_020244250.1	-	-	-	-	-	-	-	-	-	-
TRINITY_DN15044_c0_g1_i2	341.94	12.1077	1.60532	6.29639	3.04662e-10	6.50075e-09	PZD54250.1	-	-	-	-	-	-	-	-	-	-
TRINITY_DN15046_c0_g1_i2	191.537	11.2718	1.67337	5.54076	3.01161e-08	3.92261e-07	OWY48575.1	-	-	-	-	-	-	-	-	-	-
TRINITY_DN15046_c0_g2_i2	204.529	11.3664	1.65062	5.67447	1.39115e-08	1.94452e-07	OWY48575.1	-	-	-	-	-	-	-	-	-	-
TRINITY_DN15046_c1_g1_i1	266.866	11.7503	1.67063	5.83628	5.33781e-09	8.20531e-08	OWY43404.1	-	-	-	-	-	-	-	-	-	-
TRINITY_DN15055_c0_g1_i1	44.1767	9.15587	2.34677	3.04924	0.0022942	0.0132039	RMZ72995.1	-	-	-	-	-	-	-	-	-	-
TRINITY_DN15063_c0_g1_i1	76.0298	6.48062	1.22357	3.66192	0.00025033	0.00170412	XP_010910890.1	Pectinesterase (EC 3.1.1.11)	LOC105036866	Elaeis guineensis var. tenera (Oil palm)	aspartyl esterase activity [GO:0045330]; enzyme inhibitor activity [GO:0004857]; pectinesterase activity [GO:0030599]	-	cell wall modification [GO:0042545]; pectin catabolic process [GO:0045490]	PATHWAY: Glycan metabolism. {ECO:0000256|ARBA:ARBA00004881}.; PATHWAY: Glycan metabolism; pectin degradation; 2-dehydro-3-deoxy-D-gluconate from pectin: step 1/5. {ECO:0000256|ARBA:ARBA00005184, ECO:0000256|RuleBase:RU000589}.	G	-	-
TRINITY_DN150633_c0_g1_i2	322.828	12.0249	1.64988	6.07615	1.23102e-09	2.22813e-08	XP_028511536.1	-	-	-	-	-	-	-	-	-	-
TRINITY_DN15065_c0_g2_i1	333.209	12.0705	1.62375	6.20201	5.57476e-10	1.1104e-08	RYN51239.1	-	-	-	-	-	-	-	-	GRMZM2G396451_P02	GATA
TRINITY_DN150758_c0_g1_i1	84.21	10.0858	2.56834	3.14824	0.00164257	0.00970355	NP_187537.1	Beta-glucosidase 23 (AtBGLU23) (EC 3.2.1.21) (Protein PHOSPHATE STARVATION-RESPONSE 3.1)	BGLU23 PSR3.1 PYK10 At3g09260 F3L24.13	Arabidopsis thaliana (Mouse-ear cress)	beta-glucosidase activity [GO:0008422]; copper ion binding [GO:0005507]; fucosidase activity [GO:0015928]; protease binding [GO:0002020]; protein homodimerization activity [GO:0042803]; scopolin beta-glucosidase activity [GO:0102483]; thioglucosidase activity [GO:0019137]	cytosol [GO:0005829]; endoplasmic reticulum [GO:0005783]; endoplasmic reticulum lumen [GO:0005788]; ER body [GO:0010168]; nucleus [GO:0005634]; peroxisome [GO:0005777]; plasmodesma [GO:0009506]; vacuole [GO:0005773]	carbohydrate metabolic process [GO:0005975]; cellular response to cold [GO:0070417]; ER body organization [GO:0080119]; glucosinolate catabolic process [GO:0019762]; glucosinolate metabolic process [GO:0019760]; indole glucosinolate catabolic process [GO:0042344]; indole glucosinolate metabolic process [GO:0042343]; negative regulation of defense response [GO:0031348]; response to osmotic stress …	-	-	Jcr4S00282.90	NAC
TRINITY_DN15114_c0_g1_i3	219.152	11.4659	1.6395	5.77366	7.75668e-09	1.14766e-07	XP_018380992.1	-	-	-	-	-	-	-	-	-	-
TRINITY_DN15115_c1_g1_i2	691.535	13.1238	1.57465	7.0643	1.61431e-12	7.03484e-11	XP_028508307.1	-	-	-	-	-	-	-	-	-	-
TRINITY_DN15115_c3_g1_i1	6997.71	4.86545	0.479199	5.97967	2.23597e-09	3.79037e-08	XP_020585469.1	-	-	-	-	-	-	-	-	-	-
TRINITY_DN15117_c0_g2_i1	419.95	8.58644	1.02606	6.41914	1.37043e-10	3.1919e-09	XP_018384075.1	-	-	-	-	-	-	-	-	-	-
TRINITY_DN151186_c1_g1_i1	35.7592	8.85085	2.17467	3.1503	0.00163104	0.00964216	KNG48676.1	-	-	-	-	-	-	-	-	-	-
TRINITY_DN15119_c0_g1_i1	29.0919	8.55329	2.38347	2.74948	0.00596905	0.0316692	XP_007717639.1	-	-	-	-	-	-	-	-	-	-
TRINITY_DN15119_c0_g2_i1	390.552	9.82608	1.22756	6.37529	1.82614e-10	4.11485e-09	XP_018383497.1	-	-	-	-	-	-	-	-	-	-
TRINITY_DN15121_c0_g1_i2	250.449	11.6583	1.67242	5.77509	7.69132e-09	1.13958e-07	RYN83513.1	-	-	-	-	-	-	-	-	-	-
TRINITY_DN15133_c2_g1_i1	120.912	10.6082	1.77697	4.84432	1.27046e-06	1.22511e-05	XP_028500457.1	-	-	-	-	-	-	-	-	-	-
TRINITY_DN15149_c0_g1_i1	125.329	10.66	1.83349	4.72325	2.32103e-06	2.13809e-05	KNG50521.1	-	-	-	-	-	-	-	-	-	-
TRINITY_DN151491_c0_g1_i1	79.9095	10.0108	2.11663	3.78471	0.00015389	0.00108305	KNG51251.1	-	-	-	-	-	-	-	-	-	-
TRINITY_DN1515_c0_g1_i1	4523.23	4.06573	0.698816	2.95605	0.0031161	0.0174514	XP_020246929.1	-	-	-	-	-	-	-	-	-	-
TRINITY_DN15174_c1_g1_i1	135.226	10.7697	1.9799	4.42934	9.45201e-06	7.88483e-05	EMD90046.1	-	-	-	-	-	-	-	-	Gh_A02G0666	G2-like
TRINITY_DN15187_c0_g1_i10	1244.12	3.5019	0.484439	3.10029	0.00193328	0.0112742	AAM28290.1	Putative ATP/GTP binding protein	ACMD2_15088	Ananas comosus (Pineapple) (Ananas ananas)	-	-	regulation of cellular response to heat [GO:1900034]	-	-	-	-
TRINITY_DN1519_c0_g1_i1	770.24	9.7486	1.16303	6.6624	2.69393e-11	7.74908e-10	XP_008804094.1	-	-	-	-	-	-	-	-	-	-
TRINITY_DN1521_c1_g1_i2	8457.4	10.3706	0.65404	12.7983	1.6753e-37	4.16135e-34	XP_029119354.1	-	-	-	-	-	-	-	-	-	-
TRINITY_DN1521_c1_g2_i2	746.45	10.863	1.5055	5.88705	3.93142e-09	6.23872e-08	XP_018678153.1	-	-	-	-	-	-	-	-	-	-
TRINITY_DN152141_c1_g1_i1	30.921	8.64108	2.22291	2.98756	0.00281217	0.0158926	RYE15675.1	-	-	-	-	-	-	-	-	-	-
TRINITY_DN152181_c0_g1_i1	159.376	8.64975	1.70298	3.90476	9.43183e-05	0.000685268	XP_014508015.1	protein P21	LOC106767605	Vigna radiata var. radiata (Mung bean) (Phaseolus aureus)	-	-	-	-	O	-	-
TRINITY_DN1522_c0_g1_i1	1079.8	13.7667	1.57344	7.47835	7.52593e-14	5.21835e-12	XP_028500965.1	-	-	-	-	-	-	-	-	-	-
TRINITY_DN1522_c0_g2_i1	181.644	11.1953	1.99992	4.59784	4.26898e-06	3.76339e-05	RAR05923.1	-	-	-	-	-	-	-	-	-	-
TRINITY_DN15237_c1_g1_i2	93.4651	4.64658	1.01466	2.60836	0.00909781	0.0465439	-	-	-	-	-	-	-	-	-	-	-
TRINITY_DN152505_c0_g1_i2	2824.3	11.6566	0.977758	9.87628	5.27536e-23	2.3953e-20	RYN38334.1	-	-	-	-	-	-	-	-	-	-
TRINITY_DN15255_c0_g1_i2	816.643	13.3637	1.58055	7.18974	6.49132e-13	3.28668e-11	XP_028509206.1	-	-	-	-	-	-	-	-	-	-
TRINITY_DN15256_c0_g1_i2	1453.95	14.1959	1.57927	7.72249	1.14077e-14	1.01842e-12	RMZ70131.1	-	-	-	-	-	-	-	-	-	-
TRINITY_DN15261_c0_g1_i1	1048.6	5.05459	0.860104	3.55142	0.000383154	0.00252527	XP_020258639.1	-	-	-	-	-	-	-	K	XP_010924759.1	WRKY
TRINITY_DN15267_c0_g1_i1	118.961	8.24645	1.98011	3.1546	0.00160718	0.00951308	CAD97649.1	-	-	-	-	-	-	-	-	-	-
TRINITY_DN152735_c0_g1_i1	384.607	12.2774	1.60105	6.41916	1.37029e-10	3.1919e-09	RYN16847.1	-	-	-	-	-	-	-	-	-	-
TRINITY_DN15289_c0_g1_i1	58.5199	9.56147	2.1443	3.5263	0.000421401	0.00276055	KNG49841.1	-	-	-	-	-	-	-	-	-	-
TRINITY_DN1529_c1_g1_i1	7130.28	12.9953	0.966515	11.3762	5.49258e-30	5.52226e-27	ONK75331.1	Pectinesterase (EC 3.1.1.11)	A4U43_C03F15730	Asparagus officinalis (Garden asparagus)	aspartyl esterase activity [GO:0045330]; pectinesterase activity [GO:0030599]	-	cell wall modification [GO:0042545]; pectin catabolic process [GO:0045490]	PATHWAY: Glycan metabolism. {ECO:0000256|ARBA:ARBA00004881}.; PATHWAY: Glycan metabolism; pectin degradation; 2-dehydro-3-deoxy-D-gluconate from pectin: step 1/5. {ECO:0000256|ARBA:ARBA00005184, ECO:0000256|RuleBase:RU000589}.	-	MDP0000320566	NAC
TRINITY_DN1529_c1_g2_i1	310.422	11.9682	1.61159	6.18532	6.19749e-10	1.2099e-08	-	-	-	-	-	-	-	-	-	-	-
TRINITY_DN15301_c0_g2_i1	742.171	13.2257	1.58004	7.10472	1.2057e-12	5.55818e-11	XP_018383627.1	-	-	-	-	-	-	-	-	-	-
TRINITY_DN15304_c0_g1_i1	73.4563	9.88936	1.94856	4.04881	5.14782e-05	0.000389077	RII19194.1	-	-	-	-	-	-	-	-	-	-
TRINITY_DN15324_c0_g1_i4	218.961	11.4647	1.6403	5.77011	7.92199e-09	1.16966e-07	RYN49879.1	-	-	-	-	-	-	-	-	-	-
TRINITY_DN15324_c0_g2_i1	30.7595	8.63369	2.34112	2.83356	0.00460328	0.0249721	XP_018381956.1	-	-	-	-	-	-	-	-	-	-
TRINITY_DN15327_c0_g1_i3	270.701	11.7705	1.69714	5.75705	8.55949e-09	1.2537e-07	OWY47584.1	-	-	-	-	-	-	-	-	-	-
TRINITY_DN15347_c0_g1_i1	601.66	12.9229	1.57977	6.91424	4.70377e-12	1.74847e-10	KAB2106132.1	-	-	-	-	-	-	-	-	-	-
TRINITY_DN15357_c0_g1_i1	1943.07	10.4749	1.11338	7.61191	2.70084e-14	2.11986e-12	XP_018389336.1	-	-	-	-	-	-	-	-	-	-
TRINITY_DN15363_c0_g1_i1	294.816	11.8937	1.67107	5.92054	3.20882e-09	5.21414e-08	-	-	-	-	-	-	-	-	-	-	-
TRINITY_DN15373_c0_g1_i1	73.0341	7.52424	1.74877	3.15893	0.00158349	0.00938339	KNG49109.1	-	-	-	-	-	-	-	-	-	-
TRINITY_DN15373_c0_g2_i1	336.881	12.0864	1.71297	5.88827	3.90263e-09	6.19769e-08	XP_018386708.1	-	-	-	-	-	-	-	-	-	-
TRINITY_DN153793_c0_g1_i1	269.163	8.22295	1.20389	5.16905	2.35281e-07	2.55142e-06	RII24184.1	-	-	-	-	-	-	-	-	-	-
TRINITY_DN15386_c0_g1_i2	498.014	12.6501	1.59893	6.66077	2.72398e-11	7.8149e-10	RYN44391.1	-	-	-	-	-	-	-	-	-	-
[truncated: 6,882 more rows]
